# Supplementary material for: Proteomics and metabolomics analysis reveal potential mechanism of extended-spectrum β-lactamase production in Escherichia coli
Source: Royal Society of Chemistry journal article supplement (doi:10.1039/d0ra04250a), 2020-01-01
Supplement: d0ra04250a1.zip [file d0ra04250a1.zip]

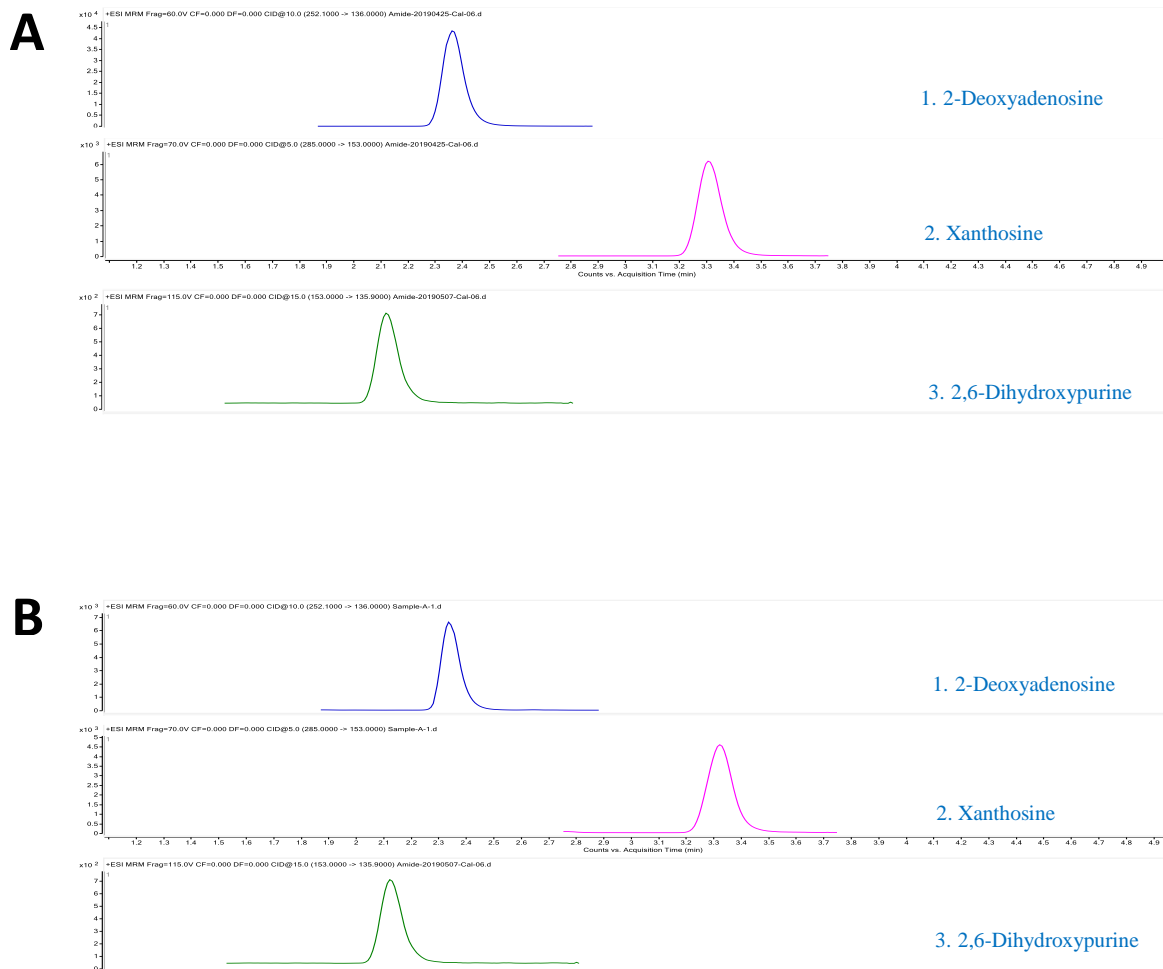

**Figure S2.** Representative extracted ion chromatographs (EICs) from a standard solution (A) and a sample (B) of the targeted analytes under the optimal conditions.
