# Supplementary material for: Proteomics and metabolomics analysis reveal potential mechanism of extended-spectrum β-lactamase production in Escherichia coli
Source: RSC Adv. 2020 Jul 17;10(45):26862–73. doi: 10.1039/d0ra04250a (PMC9055503; doi:10.1039/d0ra04250a)
Supplement: RA-010-D0RA04250A-s001 [file RA-010-D0RA04250A-s001.xlsx]

## Sheet: MRM Parameters
Compound Name	Prec Ion	Prod Ion	Frag (V)	CE (V)	Polarity	Quantifier/Qualifier
2,6-Dihydroxypurine	153	135.9	115	15	Positive	Quantifier
2,6-Dihydroxypurine	153	110	115	15	Positive	Qualifier
2-Deoxyadenosine monohydrate	252.1	136	60	10	Positive	Quantifier
2-Deoxyadenosine monohydrate	252.1	119	60	52	Positive	Qualifier
Xanthosine	285	153	70	5	Positive	Quantifier
Xanthosine	285	135.9	70	35	Positive	Qualifier
