# Supplementary material for: Proteomics and metabolomics analysis reveal potential mechanism of extended-spectrum β-lactamase production in Escherichia coli
Source: RSC Adv. 2020 Jul 17;10(45):26862–73. doi: 10.1039/d0ra04250a (PMC9055503; doi:10.1039/d0ra04250a)
Supplement: RA-010-D0RA04250A-s002 [file RA-010-D0RA04250A-s002.xlsx]

## Sheet: Time Table
Time	A (H2O)	B (ACN)	Flow
0.00 min	0.1	0.9	0.400 mL/min
2.00 min	0.1	0.9	0.400 mL/min
6.00 min	0.4	0.6	0.400 mL/min
7.00 min	0.4	0.6	0.400 mL/min
7.20 min	0.1	0.9	0.400 mL/min
10.00 min	0.1	0.9	0.400 mL/min
