# Supplementary material for: Proteomics and metabolomics analysis reveal potential mechanism of extended-spectrum β-lactamase production in Escherichia coli
Source: RSC Adv. 2020 Jul 17;10(45):26862–73. doi: 10.1039/d0ra04250a (PMC9055503; doi:10.1039/d0ra04250a)
Supplement: RA-010-D0RA04250A-s003 [file RA-010-D0RA04250A-s003.xlsx]

## Sheet: Recovery and RSD
Compound Name	Concentration (nmol/L)	Recovery	RSD
2-Deoxyadenosine monohydrate	400	93.5276	0.0102988
2,6-Dihydroxypurine	400	104.221	0.0314802
Xanthosine	400	101.821	0.0143005

## Sheet: ValueList_Helper
Sample
Blank
Cal
QC
CC
DoubleBlank
MatrixSpike
MatrixSpikeDup
MatrixBlank
TuneCheck
ResponseCheck
