# Supplementary material for: Proteomics and metabolomics analysis reveal potential mechanism of extended-spectrum β-lactamase production in Escherichia coli
Source: RSC Adv. 2020 Jul 17;10(45):26862–73. doi: 10.1039/d0ra04250a (PMC9055503; doi:10.1039/d0ra04250a)
Supplement: RA-010-D0RA04250A-s004 [file RA-010-D0RA04250A-s004.xlsx]

## Sheet: Calibration
Compound Name	LLOD (nmol/L)	LLOQ (nmol/L)	R^2
2-Deoxyadenosine monohydrate	4.8828	9.7656	0.999666
2,6-Dihydroxypurine	19.5312	39.0625	0.999759
Xanthosine	1.2207	2.4414	0.99986
2-Deoxyadenosine monohydrate
2,6-Dihydroxypurine
Xanthosine

## Sheet: ValueList_Helper
Sample
Blank
Cal
QC
CC
DoubleBlank
MatrixSpike
MatrixSpikeDup
MatrixBlank
TuneCheck
ResponseCheck
