# Supplementary material for: Proteomics and metabolomics analysis reveal potential mechanism of extended-spectrum β-lactamase production in Escherichia coli
Source: RSC Adv. 2020 Jul 17;10(45):26862–73. doi: 10.1039/d0ra04250a (PMC9055503; doi:10.1039/d0ra04250a)
Supplement: RA-010-D0RA04250A-s005 [file RA-010-D0RA04250A-s005.xlsx]

## Sheet: KEGG
KEGG pathway	Genes
eco03018:RNA degradation - Escherichia coli K-12 MG1655(8)	eco:b4143 groL:groL Cpn60 chaperonin GroEL, large subunit of GroESL||eco:b2779 eno: enolase||eco:b1084 rne: endoribonuclease||eco:b3783 rho: transcription termination factor||eco:b4172 hfq: global sRNA chaperone||eco:b4179 rnr: exoribonuclease R, RNase R||eco:b3916 pfkA: 6-phosphofructokinase I||eco:b0143 pcnB: poly(A) polymerase
eco00430:Taurine and hypotaurine metabolism - Escherichia coli K-12 MG1655(3)	eco:b1493 gadB:gadB glutamate decarboxylase B, PLP-dependent||eco:b3517 gadA: glutamate decarboxylase A, PLP-dependent||eco:b2296 ackA: acetate kinase A and propionate kinase 2
eco01110:Biosynthesis of secondary metabolites - Escherichia coli K-12 MG1655(111)	eco:b1493 gadB:gadB glutamate decarboxylase B, PLP-dependent||eco:b3517 gadA: glutamate decarboxylase A, PLP-dependent||eco:b2779 eno: enolase||eco:b1241 adhE: fused acetaldehyde-CoA dehydrogenase/iron-dependent alcohol dehydrogenase/pyruvate-formate lyase deactivase||eco:b2926 pgk: phosphoglycerate kinase||eco:b3236 mdh: malate dehydrogenase, NAD(P)-binding||eco:b1004 wrbA: NAD(P)H:quinone oxido…
eco02024:Quorum sensing - Escherichia coli K-12 MG1655(10)	eco:b1493 gadB:gadB glutamate decarboxylase B, PLP-dependent||eco:b3517 gadA: glutamate decarboxylase A, PLP-dependent||eco:b1492 gadC: glutamate:gamma-aminobutyric acid antiporter||eco:b2687 luxS: S-ribosylhomocysteine lyase||eco:b4172 hfq: global sRNA chaperone||eco:b2610 ffh: Signal Recognition Particle (SRP) component with 4.5S RNA (ffs)||eco:b3464 ftsY: Signal Recognition Particle (SRP) rece…
eco00650:Butanoate metabolism - Escherichia coli K-12 MG1655(5)	eco:b1493 gadB:gadB glutamate decarboxylase B, PLP-dependent||eco:b3517 gadA: glutamate decarboxylase A, PLP-dependent||eco:b1241 adhE: fused acetaldehyde-CoA dehydrogenase/iron-dependent alcohol dehydrogenase/pyruvate-formate lyase deactivase||eco:b0903 pflB: formate C-acetyltransferase 1, anaerobic||eco:b4153 frdB: fumarate reductase (anaerobic), Fe-S subunit
eco00250:Alanine, aspartate and glutamate metabolism - Escherichia coli K-12 MG1655(8)	eco:b1493 gadB:gadB glutamate decarboxylase B, PLP-dependent||eco:b3517 gadA: glutamate decarboxylase A, PLP-dependent||eco:b4177 purA: adenylosuccinate synthetase||eco:b3729 glmS: L-glutamine:D-fructose-6-phosphate aminotransferase||eco:b1014 putA: fused DNA-binding transcriptional regulator/proline dehydrogenase/pyrroline-5-carboxylate dehydrogenase||eco:b3870 glnA: glutamine synthetase||eco:b0…
eco01100:Metabolic pathways - Escherichia coli K-12 MG1655(213)	eco:b1493 gadB:gadB glutamate decarboxylase B, PLP-dependent||eco:b3517 gadA: glutamate decarboxylase A, PLP-dependent||eco:b2779 eno: enolase||eco:b3987 rpoB: RNA polymerase, beta subunit||eco:b1241 adhE: fused acetaldehyde-CoA dehydrogenase/iron-dependent alcohol dehydrogenase/pyruvate-formate lyase deactivase||eco:b2926 pgk: phosphoglycerate kinase||eco:b3988 rpoC: RNA polymerase, beta prime s…
eco00410:beta-Alanine metabolism - Escherichia coli K-12 MG1655(5)	eco:b1493 gadB:gadB glutamate decarboxylase B, PLP-dependent||eco:b3517 gadA: glutamate decarboxylase A, PLP-dependent||eco:b0133 panC: pantothenate synthetase||eco:b0121 speE: spermidine synthase (putrescine aminopropyltransferase)||eco:b0131 panD: aspartate 1-decarboxylase
eco01120:Microbial metabolism in diverse environments - Escherichia coli K-12 MG1655(62)	eco:b1493 gadB:gadB glutamate decarboxylase B, PLP-dependent||eco:b3517 gadA: glutamate decarboxylase A, PLP-dependent||eco:b2779 eno: enolase||eco:b1241 adhE: fused acetaldehyde-CoA dehydrogenase/iron-dependent alcohol dehydrogenase/pyruvate-formate lyase deactivase||eco:b2926 pgk: phosphoglycerate kinase||eco:b3236 mdh: malate dehydrogenase, NAD(P)-binding||eco:b0903 pflB: formate C-acetyltrans…
eco03010:Ribosome - Escherichia coli K-12 MG1655(45)	eco:b0911 rpsA:rpsA 30S ribosomal subunit protein S1||eco:b3984 rplA: 50S ribosomal subunit protein L1||eco:b3308 rplE: 50S ribosomal subunit protein L5||eco:b3303 rpsE: 30S ribosomal subunit protein S5||eco:b3301 rplO: 50S ribosomal subunit protein L15||eco:b3320 rplC: 50S ribosomal subunit protein L3||eco:b3296 rpsD: 30S ribosomal subunit protein S4||eco:b0169 rpsB: 30S ribosomal subunit protei…
eco01200:Carbon metabolism - Escherichia coli K-12 MG1655(38)	eco:b2779 eno:eno enolase||eco:b2926 pgk: phosphoglycerate kinase||eco:b3236 mdh: malate dehydrogenase, NAD(P)-binding||eco:b1779 gapA: glyceraldehyde-3-phosphate dehydrogenase A||eco:b3919 tpiA: triosephosphate isomerase||eco:b0115 aceF: pyruvate dehydrogenase, dihydrolipoyltransacetylase component E2||eco:b0114 aceE: pyruvate dehydrogenase, decarboxylase component E1, thiamine triphosphate-bind…
eco00680:Methane metabolism - Escherichia coli K-12 MG1655(12)	eco:b2779 eno:eno enolase||eco:b3236 mdh: malate dehydrogenase, NAD(P)-binding||eco:b0755 gpmA: phosphoglyceromutase 1||eco:b1702 ppsA: phosphoenolpyruvate synthase||eco:b2296 ackA: acetate kinase A and propionate kinase 2||eco:b0907 serC: 3-phosphoserine/phosphohydroxythreonine aminotransferase||eco:b3894 fdoG: formate dehydrogenase-O, large subunit||eco:b4232 fbp: fructose-1,6-bisphosphatase I|…
eco01230:Biosynthesis of amino acids - Escherichia coli K-12 MG1655(45)	eco:b2779 eno:eno enolase||eco:b2926 pgk: phosphoglycerate kinase||eco:b1779 gapA: glyceraldehyde-3-phosphate dehydrogenase A||eco:b3919 tpiA: triosephosphate isomerase||eco:b1854 pykA: pyruvate kinase II||eco:b0755 gpmA: phosphoglyceromutase 1||eco:b1136 icd: isocitrate dehydrogenase||eco:b1276 acnA: aconitate hydratase 1||eco:b2935 tktA: transketolase 1, thiamine triphosphate-binding||eco:b1207…
eco00010:Glycolysis / Gluconeogenesis - Escherichia coli K-12 MG1655(14)	eco:b2779 eno:eno enolase||eco:b1241 adhE: fused acetaldehyde-CoA dehydrogenase/iron-dependent alcohol dehydrogenase/pyruvate-formate lyase deactivase||eco:b2926 pgk: phosphoglycerate kinase||eco:b1779 gapA: glyceraldehyde-3-phosphate dehydrogenase A||eco:b3919 tpiA: triosephosphate isomerase||eco:b0115 aceF: pyruvate dehydrogenase, dihydrolipoyltransacetylase component E2||eco:b0114 aceE: pyruva…
eco01130:Biosynthesis of antibiotics - Escherichia coli K-12 MG1655(68)	eco:b2779 eno:eno enolase||eco:b1241 adhE: fused acetaldehyde-CoA dehydrogenase/iron-dependent alcohol dehydrogenase/pyruvate-formate lyase deactivase||eco:b2926 pgk: phosphoglycerate kinase||eco:b3236 mdh: malate dehydrogenase, NAD(P)-binding||eco:b1779 gapA: glyceraldehyde-3-phosphate dehydrogenase A||eco:b3919 tpiA: triosephosphate isomerase||eco:b0115 aceF: pyruvate dehydrogenase, dihydrolipo…
eco00230:Purine metabolism - Escherichia coli K-12 MG1655(31)	eco:b3987 rpoB:rpoB RNA polymerase, beta subunit||eco:b3988 rpoC: RNA polymerase, beta prime subunit||eco:b4383 deoB: phosphopentomutase||eco:b1854 pykA: pyruvate kinase II||eco:b4384 deoD: purine nucleoside phosphorylase 1||eco:b4177 purA: adenylosuccinate synthetase||eco:b3295 rpoA: RNA polymerase, alpha subunit||eco:b1207 prs: phosphoribosylpyrophosphate synthase||eco:b2507 guaA: GMP synthetas…
eco00240:Pyrimidine metabolism - Escherichia coli K-12 MG1655(21)	eco:b3987 rpoB:rpoB RNA polymerase, beta subunit||eco:b3988 rpoC: RNA polymerase, beta prime subunit||eco:b4384 deoD: purine nucleoside phosphorylase 1||eco:b3295 rpoA: RNA polymerase, alpha subunit||eco:b4382 deoA: thymidine phosphorylase||eco:b2498 upp: uracil phosphoribosyltransferase||eco:b3863 polA: 5' to 3' DNA polymerase and 3' to 5'/5' to 3' exonuclease||eco:b3649 rpoZ: RNA polymerase, om…
eco03020:RNA polymerase - Escherichia coli K-12 MG1655(4)	eco:b3987 rpoB:rpoB RNA polymerase, beta subunit||eco:b3988 rpoC: RNA polymerase, beta prime subunit||eco:b3295 rpoA: RNA polymerase, alpha subunit||eco:b3649 rpoZ: RNA polymerase, omega subunit
eco00350:Tyrosine metabolism - Escherichia coli K-12 MG1655(2)	eco:b1241 adhE:adhE fused acetaldehyde-CoA dehydrogenase/iron-dependent alcohol dehydrogenase/pyruvate-formate lyase deactivase||eco:b2021 hisC: histidinol-phosphate aminotransferase
eco00620:Pyruvate metabolism - Escherichia coli K-12 MG1655(17)	eco:b1241 adhE:adhE fused acetaldehyde-CoA dehydrogenase/iron-dependent alcohol dehydrogenase/pyruvate-formate lyase deactivase||eco:b3236 mdh: malate dehydrogenase, NAD(P)-binding||eco:b0903 pflB: formate C-acetyltransferase 1, anaerobic||eco:b0115 aceF: pyruvate dehydrogenase, dihydrolipoyltransacetylase component E2||eco:b0114 aceE: pyruvate dehydrogenase, decarboxylase component E1, thiamine …
eco00270:Cysteine and methionine metabolism - Escherichia coli K-12 MG1655(14)	eco:b3236 mdh:mdh malate dehydrogenase, NAD(P)-binding||eco:b0002 thrA: Bifunctional aspartokinase/homoserine dehydrogenase 1||eco:b2687 luxS: S-ribosylhomocysteine lyase||eco:b3433 asd: aspartate-semialdehyde dehydrogenase, NAD(P)-binding||eco:b2947 gshB: glutathione synthetase||eco:b1919 dcyD: D-cysteine desulfhydrase, PLP-dependent||eco:b2688 gshA: glutamate-cysteine ligase||eco:b3770 ilvE: br…
eco00630:Glyoxylate and dicarboxylate metabolism - Escherichia coli K-12 MG1655(14)	eco:b3236 mdh:mdh malate dehydrogenase, NAD(P)-binding||eco:b1276 acnA: aconitate hydratase 1||eco:b0720 gltA: citrate synthase||eco:b3894 fdoG: formate dehydrogenase-O, large subunit||eco:b4014 aceB: malate synthase A||eco:b3870 glnA: glutamine synthetase||eco:b1850 eda: KHG/KDPG aldolase||eco:b2799 fucO: L-1,2-propanediol oxidoreductase||eco:b3125 garR: tartronate semialdehyde reductase||eco:b1…
eco00020:Citrate cycle (TCA cycle) - Escherichia coli K-12 MG1655(7)	eco:b3236 mdh:mdh malate dehydrogenase, NAD(P)-binding||eco:b0115 aceF: pyruvate dehydrogenase, dihydrolipoyltransacetylase component E2||eco:b0114 aceE: pyruvate dehydrogenase, decarboxylase component E1, thiamine triphosphate-binding||eco:b1136 icd: isocitrate dehydrogenase||eco:b1276 acnA: aconitate hydratase 1||eco:b0720 gltA: citrate synthase||eco:b4153 frdB: fumarate reductase (anaerobic), …
eco02060:Phosphotransferase system (PTS) - Escherichia coli K-12 MG1655(5)	eco:b2416 ptsI:ptsI PEP-protein phosphotransferase of PTS system (enzyme I)||eco:b2417 crr: glucose-specific enzyme IIA component of PTS||eco:b1817 manX: fused mannose-specific PTS enzymes: IIA component/IIB component||eco:b1819 manZ: mannose-specific enzyme IID component of PTS||eco:b2934 cmtB: putative mannitol-specific enzyme IIA component of PTS
eco00640:Propanoate metabolism - Escherichia coli K-12 MG1655(5)	eco:b0903 pflB:pflB formate C-acetyltransferase 1, anaerobic||eco:b2296 ackA: acetate kinase A and propionate kinase 2||eco:b0185 accA: acetyl-CoA carboxylase, carboxytransferase, alpha subunit||eco:b2316 accD: acetyl-CoA carboxylase, beta (carboxyltransferase) subunit||eco:b2799 fucO: L-1,2-propanediol oxidoreductase
eco00130:Ubiquinone and other terpenoid-quinone biosynthesis - Escherichia coli K-12 MG1655(10)	eco:b1004 wrbA:wrbA NAD(P)H:quinone oxidoreductase||eco:b2262 menB: dihydroxynaphthoic acid synthetase||eco:b3833 ubiE: bifunctional 2-octaprenyl-6-methoxy-1,4-benzoquinone methylase/S-adenosylmethionine:2-DMK methyltransferase||eco:b3843 ubiD: 3-octaprenyl-4-hydroxybenzoate decarboxylase||eco:b0662 ubiF: 2-octaprenyl-3-methyl-6-methoxy-1,4-benzoquinol oxygenase||eco:b2232 ubiG: bifunctional 3-de…
eco00030:Pentose phosphate pathway - Escherichia coli K-12 MG1655(14)	eco:b4383 deoB:deoB phosphopentomutase||eco:b2029 gnd: 6-phosphogluconate dehydrogenase, decarboxylating||eco:b2935 tktA: transketolase 1, thiamine triphosphate-binding||eco:b1207 prs: phosphoribosylpyrophosphate synthase||eco:b4381 deoC: 2-deoxyribose-5-phosphate aldolase, NAD(P)-linked||eco:b0767 pgl: 6-phosphogluconolactonase||eco:b1852 zwf: glucose-6-phosphate 1-dehydrogenase||eco:b4232 fbp: …
eco00051:Fructose and mannose metabolism - Escherichia coli K-12 MG1655(11)	eco:b3919 tpiA:tpiA triosephosphate isomerase||eco:b1817 manX: fused mannose-specific PTS enzymes: IIA component/IIB component||eco:b3600 mtlD: mannitol-1-phosphate dehydrogenase, NAD-dependent||eco:b4232 fbp: fructose-1,6-bisphosphatase I||eco:b3916 pfkA: 6-phosphofructokinase I||eco:b1613 manA: mannose-6-phosphate isomerase||eco:b1819 manZ: mannose-specific enzyme IID component of PTS||eco:b392…
eco00190:Oxidative phosphorylation - Escherichia coli K-12 MG1655(7)	eco:b3734 atpA:atpA F1 sector of membrane-bound ATP synthase, alpha subunit||eco:b4226 ppa: inorganic pyrophosphatase||eco:b0733 cydA: cytochrome d terminal oxidase, subunit I||eco:b4153 frdB: fumarate reductase (anaerobic), Fe-S subunit||eco:b1109 ndh: respiratory NADH dehydrogenase 2/cupric reductase||eco:b2287 nuoB: NADH:ubiquinone oxidoreductase, chain B||eco:b3737 atpE: F0 sector of membrane…
eco00480:Glutathione metabolism - Escherichia coli K-12 MG1655(10)	eco:b2029 gnd:gnd 6-phosphogluconate dehydrogenase, decarboxylating||eco:b1136 icd: isocitrate dehydrogenase||eco:b3500 gor: glutathione oxidoreductase||eco:b1852 zwf: glucose-6-phosphate 1-dehydrogenase||eco:b2523 pepB: aminopeptidase B||eco:b4260 pepA: multifunctional aminopeptidase A: a cyteinylglycinase, transcription regulator and site-specific recombination factor||eco:b2947 gshB: glutathio…
eco00760:Nicotinate and nicotinamide metabolism - Escherichia coli K-12 MG1655(6)	eco:b4384 deoD:deoD purine nucleoside phosphorylase 1||eco:b1602 pntB: pyridine nucleotide transhydrogenase, beta subunit||eco:b3962 sthA: pyridine nucleotide transhydrogenase, soluble||eco:b1603 pntA: pyridine nucleotide transhydrogenase, alpha subunit||eco:b3996 nudC: NADH pyrophosphatase||eco:b2615 nadK: NAD kinase
eco00260:Glycine, serine and threonine metabolism - Escherichia coli K-12 MG1655(11)	eco:b0755 gpmA:gpmA phosphoglyceromutase 1||eco:b0907 serC: 3-phosphoserine/phosphohydroxythreonine aminotransferase||eco:b3617 kbl: glycine C-acetyltransferase||eco:b0002 thrA: Bifunctional aspartokinase/homoserine dehydrogenase 1||eco:b3433 asd: aspartate-semialdehyde dehydrogenase, NAD(P)-binding||eco:b2585 pssA: phosphatidylserine synthase||eco:b0004 thrC: L-threonine synthase||eco:b1261 trpB…
eco01210:2-Oxocarboxylic acid metabolism - Escherichia coli K-12 MG1655(7)	eco:b1136 icd:icd isocitrate dehydrogenase||eco:b1276 acnA: aconitate hydratase 1||eco:b0720 gltA: citrate synthase||eco:b3433 asd: aspartate-semialdehyde dehydrogenase, NAD(P)-binding||eco:b3774 ilvC: ketol-acid reductoisomerase, NAD(P)-binding||eco:b3770 ilvE: branched-chain amino acid aminotransferase||eco:b3957 argE: acetylornithine deacetylase
eco00970:Aminoacyl-tRNA biosynthesis - Escherichia coli K-12 MG1655(16)	eco:b2697 alaS:alaS alanyl-tRNA synthetase||eco:b2890 lysS: lysine tRNA synthetase, constitutive||eco:b0026 ileS: isoleucyl-tRNA synthetase||eco:b0194 proS: prolyl-tRNA synthetase||eco:b0642 leuS: leucyl-tRNA synthetase||eco:b2114 metG: methionyl-tRNA synthetase||eco:b1719 thrS: threonyl-tRNA synthetase||eco:b2514 hisS: histidyl tRNA synthetase||eco:b1876 argS: arginyl-tRNA synthetase||eco:b2400 …
eco00380:Tryptophan metabolism - Escherichia coli K-12 MG1655(2)	eco:b3708 tnaA:tnaA tryptophanase/L-cysteine desulfhydrase, PLP-dependent||eco:b3942 katG: catalase-peroxidase HPI, heme b-containing
eco00564:Glycerophospholipid metabolism - Escherichia coli K-12 MG1655(13)	eco:b2239 glpQ:glpQ periplasmic glycerophosphodiester phosphodiesterase||eco:b2585 pssA: phosphatidylserine synthase||eco:b3608 gpsA: glycerol-3-phosphate dehydrogenase (NAD+)||eco:b4041 plsB: glycerol-3-phosphate O-acyltransferase||eco:b4160 psd: phosphatidylserine decarboxylase||eco:b2241 glpA: anaerobic sn-glycerol-3-phosphate dehydrogenase, large FAD/NAD(P)-binding subunit||eco:b2243 glpC: an…
eco00520:Amino sugar and nucleotide sugar metabolism - Escherichia coli K-12 MG1655(17)	eco:b3729 glmS:glmS L-glutamine:D-fructose-6-phosphate aminotransferase||eco:b2417 crr: glucose-specific enzyme IIA component of PTS||eco:b1817 manX: fused mannose-specific PTS enzymes: IIA component/IIB component||eco:b3430 glgC: glucose-1-phosphate adenylyltransferase||eco:b3176 glmM: phosphoglucosamine mutase||eco:b0677 nagA: N-acetylglucosamine-6-phosphate deacetylase||eco:b1613 manA: mannose…
eco00500:Starch and sucrose metabolism - Escherichia coli K-12 MG1655(9)	eco:b2417 crr:crr glucose-specific enzyme IIA component of PTS||eco:b3430 glgC: glucose-1-phosphate adenylyltransferase||eco:b1197 treA: periplasmic trehalase||eco:b3429 glgA: glycogen synthase||eco:b2132 bglX: beta-D-glucoside glucohydrolase, periplasmic||eco:b1896 otsA: trehalose-6-phosphate synthase||eco:b3432 glgB: 1,4-alpha-glucan branching enzyme||eco:b2388 glk: glucokinase||eco:b3431 glgX:…
eco02026:Biofilm formation - Escherichia coli - Escherichia coli K-12 MG1655(10)	eco:b2417 crr:crr glucose-specific enzyme IIA component of PTS||eco:b2687 luxS: S-ribosylhomocysteine lyase||eco:b3430 glgC: glucose-1-phosphate adenylyltransferase||eco:b2696 csrA: pleiotropic regulatory protein for carbon source metabolism||eco:b3405 ompR: response regulator in two-component regulatory system with EnvZ||eco:b3429 glgA: glycogen synthase||eco:b2000 flu: CP4-44 prophage||eco:b014…
eco00330:Arginine and proline metabolism - Escherichia coli K-12 MG1655(4)	eco:b1014 putA:putA fused DNA-binding transcriptional regulator/proline dehydrogenase/pyrroline-5-carboxylate dehydrogenase||eco:b0337 codA: cytosine/isoguanine deaminase||eco:b0120 speD: S-adenosylmethionine decarboxylase||eco:b0121 speE: spermidine synthase (putrescine aminopropyltransferase)
eco00561:Glycerolipid metabolism - Escherichia coli K-12 MG1655(4)	eco:b3926 glpK:glpK glycerol kinase||eco:b4041 plsB: glycerol-3-phosphate O-acyltransferase||eco:b1090 plsX: putative phosphate acyltransferase||eco:b3018 plsC: 1-acyl-sn-glycerol-3-phosphate acyltransferase
eco01212:Fatty acid metabolism - Escherichia coli K-12 MG1655(7)	eco:b1288 fabI:fabI enoyl-[acyl-carrier-protein] reductase, NADH-dependent||eco:b0954 fabA: beta-hydroxydecanoyl thioester dehydrase||eco:b1092 fabD: malonyl-CoA-[acyl-carrier-protein] transacylase||eco:b0185 accA: acetyl-CoA carboxylase, carboxytransferase, alpha subunit||eco:b2316 accD: acetyl-CoA carboxylase, beta (carboxyltransferase) subunit||eco:b0180 fabZ: (3R)-hydroxymyristol acyl carrier…
eco00061:Fatty acid biosynthesis - Escherichia coli K-12 MG1655(7)	eco:b1288 fabI:fabI enoyl-[acyl-carrier-protein] reductase, NADH-dependent||eco:b0954 fabA: beta-hydroxydecanoyl thioester dehydrase||eco:b1092 fabD: malonyl-CoA-[acyl-carrier-protein] transacylase||eco:b0185 accA: acetyl-CoA carboxylase, carboxytransferase, alpha subunit||eco:b2316 accD: acetyl-CoA carboxylase, beta (carboxyltransferase) subunit||eco:b0180 fabZ: (3R)-hydroxymyristol acyl carrier…
eco00780:Biotin metabolism - Escherichia coli K-12 MG1655(5)	eco:b1288 fabI:fabI enoyl-[acyl-carrier-protein] reductase, NADH-dependent||eco:b0180 fabZ: (3R)-hydroxymyristol acyl carrier protein dehydratase||eco:b0778 bioD: dethiobiotin synthetase||eco:b1093 fabG: 3-oxoacyl-[acyl-carrier-protein] reductase||eco:b3973 birA: bifunctional biotin-[acetylCoA carboxylase] holoenzyme synthetase/DNA-binding transcriptional repressor, bio-5'-AMP-binding
eco00450:Selenocompound metabolism - Escherichia coli K-12 MG1655(5)	eco:b2114 metG:metG methionyl-tRNA synthetase||eco:b1764 selD: selenophosphate synthase||eco:b3591 selA: selenocysteine synthase||eco:b4019 metH: homocysteine-N5-methyltetrahydrofolate transmethylase, B12-dependent||eco:b3829 metE: 5-methyltetrahydropteroyltriglutamate-homocysteine S-methyltransferase
eco02010:ABC transporters - Escherichia coli K-12 MG1655(13)	eco:b3751 rbsB:rbsB D-ribose ABC transporter periplasmic binding protein||eco:b3193 mlaD: OM lipid asymmetry maintenance protein||eco:b0914 msbA: lipid ABC transporter permease/ATPase||eco:b0886 cydC: glutathione/cysteine ABC transporter export permease/ATPase||eco:b0830 gsiB: glutathione ABC transporter periplasmic binding protein||eco:b0199 metN: DL-methionine transporter subunit||eco:b4088 als…
eco02030:Bacterial chemotaxis - Escherichia coli K-12 MG1655(2)	eco:b3751 rbsB:rbsB D-ribose ABC transporter periplasmic binding protein||eco:b4355 tsr: methyl-accepting chemotaxis protein I, serine sensor receptor
eco00360:Phenylalanine metabolism - Escherichia coli K-12 MG1655(2)	eco:b3942 katG:katG catalase-peroxidase HPI, heme b-containing||eco:b2021 hisC: histidinol-phosphate aminotransferase
eco03440:Homologous recombination - Escherichia coli K-12 MG1655(8)	eco:b2699 recA:recA DNA recombination and repair protein||eco:b3863 polA: 5' to 3' DNA polymerase and 3' to 5'/5' to 3' exonuclease||eco:b0470 dnaX: DNA polymerase III/DNA elongation factor III, tau and gamma subunits||eco:b4362 dnaT: DNA biosynthesis protein (primosomal protein I)||eco:b1861 ruvA: component of RuvABC resolvasome, regulatory subunit||eco:b0640 holA: DNA polymerase III, delta subu…
eco00750:Vitamin B6 metabolism - Escherichia coli K-12 MG1655(3)	eco:b0907 serC:serC 3-phosphoserine/phosphohydroxythreonine aminotransferase||eco:b0004 thrC: L-threonine synthase||eco:b1638 pdxH: pyridoxine 5'-phosphate oxidase
eco01503:Cationic antimicrobial peptide (CAMP) resistance - Escherichia coli K-12 MG1655(7)	eco:b3035 tolC:tolC transport channel||eco:b0192 nlpE: lipoprotein involved with copper homeostasis and adhesion||eco:b2253 arnB: uridine 5'-(beta-1-threo-pentapyranosyl-4-ulose diphosphate) aminotransferase, PLP-dependent||eco:b3363 ppiA: peptidyl-prolyl cis-trans isomerase A (rotamase A)||eco:b1291 sapD: antimicrobial peptide ABC transporter ATPase||eco:b1290 sapF: antimicrobial peptide ABC tra…
eco03070:Bacterial secretion system - Escherichia coli K-12 MG1655(7)	eco:b3035 tolC:tolC transport channel||eco:b2610 ffh: Signal Recognition Particle (SRP) component with 4.5S RNA (ffs)||eco:b3464 ftsY: Signal Recognition Particle (SRP) receptor||eco:b0408 secD: SecYEG protein translocase auxillary subunit||eco:b3836 tatA: TatABCE protein translocation system subunit||eco:b0409 secF: SecYEG protein translocase auxillary subunit||eco:b3300 secY: preprotein translo…
eco01501:beta-Lactam resistance - Escherichia coli K-12 MG1655(3)	eco:b3035 tolC:tolC transport channel||eco:b1107 nagZ: beta N-acetyl-glucosaminidase||eco:b0635 mrdA: penicillin-binding protein 2, transpeptidase involved in peptidoglycan synthesis
eco02020:Two-component system - Escherichia coli K-12 MG1655(22)	eco:b3035 tolC:tolC transport channel||eco:b1479 maeA: malate dehydrogenase, decarboxylating, NAD-requiring||eco:b2696 csrA: pleiotropic regulatory protein for carbon source metabolism||eco:b3870 glnA: glutamine synthetase||eco:b3405 ompR: response regulator in two-component regulatory system with EnvZ||eco:b0733 cydA: cytochrome d terminal oxidase, subunit I||eco:b4153 frdB: fumarate reductase (…
eco03030:DNA replication - Escherichia coli K-12 MG1655(5)	eco:b3863 polA:polA 5' to 3' DNA polymerase and 3' to 5'/5' to 3' exonuclease||eco:b2411 ligA: DNA ligase, NAD(+)-dependent||eco:b0470 dnaX: DNA polymerase III/DNA elongation factor III, tau and gamma subunits||eco:b0640 holA: DNA polymerase III, delta subunit||eco:b3066 dnaG: DNA primase
eco03410:Base excision repair - Escherichia coli K-12 MG1655(4)	eco:b3863 polA:polA 5' to 3' DNA polymerase and 3' to 5'/5' to 3' exonuclease||eco:b2411 ligA: DNA ligase, NAD(+)-dependent||eco:b3068 mug: G/U mismatch-specific DNA glycosylase||eco:b3635 mutM: formamidopyrimidine/5-formyluracil/5-hydroxymethyluracil DNA glycosylase
eco03420:Nucleotide excision repair - Escherichia coli K-12 MG1655(6)	eco:b3863 polA:polA 5' to 3' DNA polymerase and 3' to 5'/5' to 3' exonuclease||eco:b4058 uvrA: ATPase and DNA damage recognition protein of nucleotide excision repair excinuclease UvrABC||eco:b1114 mfd: transcription-repair coupling factor||eco:b0779 uvrB: exision nuclease of nucleotide excision repair, DNA damage recognition component||eco:b2411 ligA: DNA ligase, NAD(+)-dependent||eco:b3813 uvrD…
eco00300:Lysine biosynthesis - Escherichia coli K-12 MG1655(6)	eco:b0002 thrA:thrA Bifunctional aspartokinase/homoserine dehydrogenase 1||eco:b2478 dapA: dihydrodipicolinate synthase||eco:b3433 asd: aspartate-semialdehyde dehydrogenase, NAD(P)-binding||eco:b0166 dapD: 2,3,4,5-tetrahydropyridine-2-carboxylate N-succinyltransferase||eco:b2472 dapE: N-succinyl-diaminopimelate deacylase||eco:b0086 murF: UDP-N-acetylmuramoyl-tripeptide:D-alanyl-D-alanine ligase
eco00261:Monobactam biosynthesis - Escherichia coli K-12 MG1655(3)	eco:b0002 thrA:thrA Bifunctional aspartokinase/homoserine dehydrogenase 1||eco:b2478 dapA: dihydrodipicolinate synthase||eco:b3433 asd: aspartate-semialdehyde dehydrogenase, NAD(P)-binding
eco00860:Porphyrin and chlorophyll metabolism - Escherichia coli K-12 MG1655(6)	eco:b0154 hemL:hemL glutamate-1-semialdehyde aminotransferase (aminomutase)||eco:b2400 gltX: glutamyl-tRNA synthetase||eco:b3805 hemC: hydroxymethylbilane synthase||eco:b3368 cysG: fused siroheme synthase 1,3-dimethyluroporphyriongen III dehydrogenase and siroheme ferrochelatase/uroporphyrinogen methyltransferase||eco:b3850 hemG: protoporphyrin oxidase, flavoprotein||eco:b1992 cobS: cobalamin syn…
eco00040:Pentose and glucuronate interconversions - Escherichia coli K-12 MG1655(5)	eco:b3092 uxaC:uxaC uronate isomerase||eco:b4322 uxuA: mannonate hydrolase||eco:b3386 rpe: D-ribulose-5-phosphate 3-epimerase||eco:b4323 uxuB: D-mannonate oxidoreductase, NAD-dependent||eco:b4196 ulaD: 3-keto-L-gulonate 6-phosphate decarboxylase
eco00900:Terpenoid backbone biosynthesis - Escherichia coli K-12 MG1655(7)	eco:b2515 ispG:ispG 1-hydroxy-2-methyl-2-(E)-butenyl 4-diphosphate synthase||eco:b0420 dxs: 1-deoxyxylulose-5-phosphate synthase, thiamine triphosphate-binding, FAD-requiring||eco:b0029 ispH: 4-hydroxy-3-methylbut-2-enyl diphosphate reductase, 4Fe-4S protein||eco:b2746 ispF: 2C-methyl-D-erythritol 2,4-cyclodiphosphate synthase||eco:b0421 ispA: geranyltranstransferase||eco:b1208 ispE: 4-diphosphoc…
eco00730:Thiamine metabolism - Escherichia coli K-12 MG1655(4)	eco:b0474 adk:adk adenylate kinase||eco:b0420 dxs: 1-deoxyxylulose-5-phosphate synthase, thiamine triphosphate-binding, FAD-requiring||eco:b0423 thiI: tRNA s(4)U8 sulfurtransferase||eco:b0417 thiL: thiamine monophosphate kinase
eco03060:Protein export - Escherichia coli K-12 MG1655(7)	eco:b2610 ffh:ffh Signal Recognition Particle (SRP) component with 4.5S RNA (ffs)||eco:b3464 ftsY: Signal Recognition Particle (SRP) receptor||eco:b0408 secD: SecYEG protein translocase auxillary subunit||eco:b2568 lepB: leader peptidase (signal peptidase I)||eco:b3836 tatA: TatABCE protein translocation system subunit||eco:b0409 secF: SecYEG protein translocase auxillary subunit||eco:b3300 secY:…
eco00052:Galactose metabolism - Escherichia coli K-12 MG1655(2)	eco:b3916 pfkA:pfkA 6-phosphofructokinase I||eco:b2388 glk: glucokinase
eco00910:Nitrogen metabolism - Escherichia coli K-12 MG1655(2)	eco:b3870 glnA:glnA glutamine synthetase||eco:b2206 napA: nitrate reductase, periplasmic, large subunit
eco00220:Arginine biosynthesis - Escherichia coli K-12 MG1655(3)	eco:b3870 glnA:glnA glutamine synthetase||eco:b3957 argE: acetylornithine deacetylase||eco:b3960 argH: argininosuccinate lyase
eco00790:Folate biosynthesis - Escherichia coli K-12 MG1655(9)	eco:b0782 moaB:moaB inactive molybdopterin adenylyltransferase||eco:b1277 ribA: GTP cyclohydrolase II||eco:b0827 moeA: molybdopterin molybdenumtransferase||eco:b3177 folP: 7,8-dihydropteroate synthase||eco:b2303 folX: D-erythro-7,8-dihydroneopterin triphosphate 2'-epimerase and dihydroneopterin aldolase||eco:b0785 moaE: molybdopterin synthase, large subunit||eco:b2153 folE: GTP cyclohydrolase I||…
eco00770:Pantothenate and CoA biosynthesis - Escherichia coli K-12 MG1655(5)	eco:b3774 ilvC:ilvC ketol-acid reductoisomerase, NAD(P)-binding||eco:b0133 panC: pantothenate synthetase||eco:b3770 ilvE: branched-chain amino acid aminotransferase||eco:b0134 panB: 3-methyl-2-oxobutanoate hydroxymethyltransferase||eco:b0131 panD: aspartate 1-decarboxylase
eco00290:Valine, leucine and isoleucine biosynthesis - Escherichia coli K-12 MG1655(3)	eco:b3774 ilvC:ilvC ketol-acid reductoisomerase, NAD(P)-binding||eco:b3770 ilvE: branched-chain amino acid aminotransferase||eco:b3572 avtA: valine-pyruvate aminotransferase
eco00400:Phenylalanine, tyrosine and tryptophan biosynthesis - Escherichia coli K-12 MG1655(9)	eco:b3390 aroK:aroK shikimate kinase I||eco:b1261 trpB: tryptophan synthase, beta subunit||eco:b1260 trpA: tryptophan synthase, alpha subunit||eco:b1693 aroD: 3-dehydroquinate dehydratase||eco:b3389 aroB: 3-dehydroquinate synthase||eco:b2329 aroC: chorismate synthase||eco:b2021 hisC: histidinol-phosphate aminotransferase||eco:b0908 aroA: 5-enolpyruvylshikimate-3-phosphate synthetase||eco:b1263 tr…
eco00340:Histidine metabolism - Escherichia coli K-12 MG1655(4)	eco:b2022 hisB:hisB histidinol-phosphatase and imidazoleglycerol-phosphate dehydratase||eco:b2024 hisA: N-(5'-phospho-L-ribosyl-formimino)-5-amino-1-(5'-phosphoribosyl)-4-imidazolecarboxamide isomerase||eco:b2021 hisC: histidinol-phosphate aminotransferase||eco:b2023 hisH: imidazole glycerol phosphate synthase, glutamine amidotransferase subunit
eco03430:Mismatch repair - Escherichia coli K-12 MG1655(5)	eco:b2411 ligA:ligA DNA ligase, NAD(+)-dependent||eco:b4170 mutL: methyl-directed mismatch repair protein||eco:b0470 dnaX: DNA polymerase III/DNA elongation factor III, tau and gamma subunits||eco:b3813 uvrD: DNA-dependent ATPase I and helicase II||eco:b0640 holA: DNA polymerase III, delta subunit
eco00670:One carbon pool by folate - Escherichia coli K-12 MG1655(4)	eco:b4006 purH:purH IMP cyclohydrolase and phosphoribosylaminoimidazolecarboxamide formyltransferase||eco:b0529 folD: bifunctional 5,10-methylene-tetrahydrofolate dehydrogenase/5,10-methylene-tetrahydrofolate cyclohydrolase||eco:b1232 purU: formyltetrahydrofolate hydrolase||eco:b4019 metH: homocysteine-N5-methyltetrahydrofolate transmethylase, B12-dependent
eco00550:Peptidoglycan biosynthesis - Escherichia coli K-12 MG1655(7)	eco:b3189 murA:murA UDP-N-acetylglucosamine 1-carboxyvinyltransferase||eco:b0088 murD: UDP-N-acetylmuramoyl-L-alanine:D-glutamate ligase||eco:b0090 murG: N-acetylglucosaminyl transferase||eco:b0091 murC: UDP-N-acetylmuramate:L-alanine ligase||eco:b0086 murF: UDP-N-acetylmuramoyl-tripeptide:D-alanyl-D-alanine ligase||eco:b0635 mrdA: penicillin-binding protein 2, transpeptidase involved in peptidog…
eco00540:Lipopolysaccharide biosynthesis - Escherichia coli K-12 MG1655(4)	eco:b0179 lpxD:lpxD UDP-3-O-(3-hydroxymyristoyl)-glucosamine N-acyltransferase||eco:b0096 lpxC: UDP-3-O-acyl N-acetylglucosamine deacetylase||eco:b0918 kdsB: 3-deoxy-manno-octulosonate cytidylyltransferase||eco:b0182 lpxB: tetraacyldisaccharide-1-P synthase
eco00471:D-Glutamine and D-glutamate metabolism - Escherichia coli K-12 MG1655(3)	eco:b0088 murD:murD UDP-N-acetylmuramoyl-L-alanine:D-glutamate ligase||eco:b0091 murC: UDP-N-acetylmuramate:L-alanine ligase||eco:b3967 murI: glutamate racemase
eco01502:Vancomycin resistance - Escherichia coli K-12 MG1655(4)	eco:b0090 murG:murG N-acetylglucosaminyl transferase||eco:b0086 murF: UDP-N-acetylmuramoyl-tripeptide:D-alanyl-D-alanine ligase||eco:b4053 alr: alanine racemase, biosynthetic, PLP-binding||eco:b0087 mraY: phospho-N-acetylmuramoyl-pentapeptide transferase
eco00740:Riboflavin metabolism - Escherichia coli K-12 MG1655(2)	eco:b1277 ribA:ribA GTP cyclohydrolase II||eco:b3041 ribB: 3,4-dihydroxy-2-butanone-4-phosphate synthase
eco01040:Biosynthesis of unsaturated fatty acids - Escherichia coli K-12 MG1655(3)	eco:b0452 tesB:tesB acyl-CoA thioesterase 2||eco:b1093 fabG: 3-oxoacyl-[acyl-carrier-protein] reductase||eco:b0494 tesA: acyl-CoA thioesterase 1 and protease I and lysophospholipase L1
eco04122:Sulfur relay system - Escherichia coli K-12 MG1655(3)	eco:b0785 moaE:moaE molybdopterin synthase, large subunit||eco:b0423 thiI: tRNA s(4)U8 sulfurtransferase||eco:b3470 tusA: mnm(5)-s(2)U34-tRNA 2-thiolation sulfurtransferase
eco00053:Ascorbate and aldarate metabolism - Escherichia coli K-12 MG1655(2)	eco:b3126 garL:garL alpha-dehydro-beta-deoxy-D-glucarate aldolase||eco:b4196 ulaD: 3-keto-L-gulonate 6-phosphate decarboxylase
