# Supplementary material for: Proteomics and metabolomics analysis reveal potential mechanism of extended-spectrum β-lactamase production in Escherichia coli
Source: RSC Adv. 2020 Jul 17;10(45):26862–73. doi: 10.1039/d0ra04250a (PMC9055503; doi:10.1039/d0ra04250a)
Supplement: RA-010-D0RA04250A-s006 [file RA-010-D0RA04250A-s006.xlsx]

## Sheet: GC_BP
Category	Term	Count	%	PValue	Genes	List Total	Pop Hits	Pop Total	Fold Enrichment	Bonferroni	Benjamini	FDR
GOTERM_BP_DIRECT	GO:0006412~translation	46	6.82493	6.95444e-20	RPLJ, RPLL, RPLM, DEF, RPLI, RPLC, RPLD, RPLE, RPSU, RPLA, PTH, RPSB, RPMJ, RPSA, RPSC, RPMH, RPMA, RPMB, RPME, RPMF, RPMC, RPMD, RPLY, RPSR, RPLW, RPLV, RPSM, RPSN, LYSS, RPSO, ADK, RPSP, RPSI, RPLQ, RIMP, YBEY, RPSJ, RPLO, RPSK, RPLN, RPSF, RPLT, RPLS, RPSG, RPLR, RPSH	609	64	3277	3.86756	4.95156e-17	4.95156e-17	1.05116e-16
GOTERM_BP_DIRECT	GO:0031564~transcription antitermination	9	1.33531	0.000717412	RFAH, RPSD, CSPE, RPSJ, YBEY, NUSG, PEPA, CSPA, CSPC	609	13	3277	3.72527	0.400093	0.225463	1.07889
GOTERM_BP_DIRECT	GO:0006096~glycolytic process	11	1.63205	0.00220401	ACEF, ENO, TPIA, ACEE, GAPA, GPMA, MDH, PYKA, PFKA, GLK, PGK	609	21	3277	2.81859	0.792161	0.407653	3.28003
GOTERM_BP_DIRECT	GO:0019288~isopentenyl diphosphate biosynthetic process, methylerythritol 4-phosphate pathway	6	0.890208	0.00326652	ISPE, ISPF, DXR, ISPG, DXS, ISPH	609	7	3277	4.61224	0.902662	0.441439	4.8251
GOTERM_BP_DIRECT	GO:0045947~negative regulation of translational initiation	6	0.890208	0.00326652	RPSD, THRS, RAIA, RATA, CSRA, RPLA	609	7	3277	4.61224	0.902662	0.441439	4.8251
GOTERM_BP_DIRECT	GO:0015949~nucleobase-containing small molecule interconversion	10	1.48368	0.00384333	TMK, DCD, RELA, CMK, CDD, DEOC, NRDD, APAH, SPOT, PURA	609	19	3277	2.83208	0.935541	0.422094	5.65422
GOTERM_BP_DIRECT	GO:0006744~ubiquinone biosynthetic process	8	1.18694	0.00444642	UBIC, UBIB, ISPF, DXS, UBIE, UBID, UBIG, UBIF	609	13	3277	3.31136	0.958119	0.410699	6.51388
GOTERM_BP_DIRECT	GO:0046939~nucleotide phosphorylation	5	0.74184	0.00500965	USPG, TMK, PYRH, ADK, CMK	609	5	3277	5.38095	0.972008	0.400005	7.31011
GOTERM_BP_DIRECT	GO:0016114~terpenoid biosynthetic process	5	0.74184	0.0128257	ISPE, ISPF, ISPG, DXS, ISPH	609	6	3277	4.48413	0.999898	0.683004	17.7258
GOTERM_BP_DIRECT	GO:0006353~DNA-templated transcription, termination	5	0.74184	0.0128257	RPSD, NUSB, RPLD, NUSG, RHO	609	6	3277	4.48413	0.999898	0.683004	17.7258
GOTERM_BP_DIRECT	GO:0000027~ribosomal large subunit assembly	7	1.03858	0.0133287	DER, RPLK, RPLW, RLUD, SRMB, RPLE, RPLT	609	12	3277	3.13889	0.999929	0.654076	18.3572
GOTERM_BP_DIRECT	GO:0006541~glutamine metabolic process	7	1.03858	0.0133287	GUAA, PYRG, HISH, TRPD, GLMS, PURL, ASNB	609	12	3277	3.13889	0.999929	0.654076	18.3572
GOTERM_BP_DIRECT	GO:0051301~cell division	19	2.81899	0.017305	TOLR, FTSK, TIG, MRAY, CLPX, MINC, MURC, MURD, ZAPA, MURF, MRDB, MURG, TOLA, TOLB, FTSA, MPL, NAGZ, GROL, MURA	609	59	3277	1.73285	0.999996	0.711455	23.1914
GOTERM_BP_DIRECT	GO:0006508~proteolysis	13	1.92878	0.0243028	HTPX, DEGQ, MRDA, DCP, TSAB, PRC, TSAD, LEPB, DEGS, TLDD, PEPB, CLPX, PTRA	609	36	3277	1.94312	1	0.79658	31.0558
GOTERM_BP_DIRECT	GO:0006265~DNA topological change	5	0.74184	0.0255712	TOPA, GYRA, PARE, GYRB, PARC	609	7	3277	3.84354	1	0.784966	32.3981
GOTERM_BP_DIRECT	GO:0006164~purine nucleotide biosynthetic process	5	0.74184	0.0255712	PURR, PURL, FOLD, PURU, PURA	609	7	3277	3.84354	1	0.784966	32.3981
GOTERM_BP_DIRECT	GO:0009073~aromatic amino acid family biosynthetic process	7	1.03858	0.031032	TRPB, AROK, AROD, AROC, AROB, AROA, TRPA	609	14	3277	2.69048	1	0.822099	37.9033
GOTERM_BP_DIRECT	GO:0006633~fatty acid biosynthetic process	8	1.18694	0.0351606	FABZ, FABG, ACCA, PLSX, ACCD, FABD, FABR, FABA	609	18	3277	2.39153	1	0.838032	41.7844
GOTERM_BP_DIRECT	GO:0017148~negative regulation of translation	6	0.890208	0.0373756	RPLY, ACCD, RSFS, RPLD, RPLT, RPSG	609	11	3277	2.93506	1	0.836034	43.7721
GOTERM_BP_DIRECT	GO:0006098~pentose-phosphate shunt	5	0.74184	0.043756	RPE, TPIA, GND, PGL, ZWF	609	8	3277	3.3631	1	0.863445	49.1492
GOTERM_BP_DIRECT	GO:0006268~DNA unwinding involved in DNA replication	5	0.74184	0.043756	UVRD, GYRA, PARE, GYRB, PARC	609	8	3277	3.3631	1	0.863445	49.1492
GOTERM_BP_DIRECT	GO:0000028~ribosomal small subunit assembly	5	0.74184	0.043756	RPSP, RIMP, RPSK, ERA, RPSG	609	8	3277	3.3631	1	0.863445	49.1492
GOTERM_BP_DIRECT	GO:0019563~glycerol catabolic process	5	0.74184	0.043756	GLPK, TPIA, GLPA, GLPD, GLPC	609	8	3277	3.3631	1	0.863445	49.1492
GOTERM_BP_DIRECT	GO:0016226~iron-sulfur cluster assembly	8	1.18694	0.0470462	FDX, SUFA, CSDE, ERPA, SUFB, CSDA, SUFD, HSCA	609	19	3277	2.26566	1	0.867114	51.7306
GOTERM_BP_DIRECT	GO:0070475~rRNA base methylation	8	1.18694	0.0470462	RLML, RLMN, RSMB, RLMD, RLMC, RSMC, RLMJ, RLMI	609	19	3277	2.26566	1	0.867114	51.7306
GOTERM_BP_DIRECT	GO:0046168~glycerol-3-phosphate catabolic process	4	0.593472	0.0472807	GPSA, GLPA, GLPD, GLPC	609	5	3277	4.30476	1	0.852787	51.9098
GOTERM_BP_DIRECT	GO:0019877~diaminopimelate biosynthetic process	4	0.593472	0.0472807	DAPA, ASD, DAPE, DAPD	609	5	3277	4.30476	1	0.852787	51.9098
GOTERM_BP_DIRECT	GO:0060567~negative regulation of DNA-templated transcription, termination	4	0.593472	0.0472807	CSPE, ROF, CSPA, CSPC	609	5	3277	4.30476	1	0.852787	51.9098
GOTERM_BP_DIRECT	GO:0006479~protein methylation	4	0.593472	0.0472807	METH, METE, PRMB, PCM	609	5	3277	4.30476	1	0.852787	51.9098
GOTERM_BP_DIRECT	GO:0009409~response to cold	6	0.890208	0.0545519	INFC, LEPA, RNR, RAIA, RBFA, CSPA	609	12	3277	2.69048	1	0.877805	57.1683
GOTERM_BP_DIRECT	GO:0043165~Gram-negative-bacterium-type cell outer membrane assembly	6	0.890208	0.0545519	LPTC, SKP, LPTD, BAME, BAMC, BAMA	609	12	3277	2.69048	1	0.877805	57.1683
GOTERM_BP_DIRECT	GO:0007049~cell cycle	12	1.78042	0.0558203	MURC, MURD, MURF, FTSK, MRDB, MURG, TIG, MPL, MRAY, NAGZ, MURA, GROL	609	36	3277	1.79365	1	0.870596	58.0286
GOTERM_BP_DIRECT	GO:0008360~regulation of cell shape	15	2.22552	0.0566023	RODZ, MREC, ALR, MRAY, LPOA, MURC, MURD, MURF, MRDA, MRDB, MURG, MURI, MPL, NAGZ, MURA	609	49	3277	1.64723	1	0.861314	58.551
GOTERM_BP_DIRECT	GO:0009252~peptidoglycan biosynthetic process	14	2.07715	0.059912	ALR, MRAY, LPOA, MURC, MURD, MURF, MRDA, MRDB, MURG, MURI, MLTB, MPL, NAGZ, MURA	609	45	3277	1.67407	1	0.864595	60.6954
GOTERM_BP_DIRECT	GO:0009234~menaquinone biosynthetic process	5	0.74184	0.0674757	MENB, MENC, MEND, UBIE, MENI	609	9	3277	2.98942	1	0.884977	65.2131
GOTERM_BP_DIRECT	GO:0006071~glycerol metabolic process	5	0.74184	0.0674757	GLPK, GLPQ, UGPQ, GLPT, GLPX	609	9	3277	2.98942	1	0.884977	65.2131
GOTERM_BP_DIRECT	GO:0008654~phospholipid biosynthetic process	6	0.890208	0.0755581	YEGS, PSD, PLSX, ADK, PSSA, PLSB	609	13	3277	2.48352	1	0.902779	69.5019
GOTERM_BP_DIRECT	GO:0006094~gluconeogenesis	6	0.890208	0.0755581	MAEA, TPIA, GPMA, PPSA, FBP, GLPX	609	13	3277	2.48352	1	0.902779	69.5019
GOTERM_BP_DIRECT	GO:0006777~Mo-molybdopterin cofactor biosynthetic process	6	0.890208	0.0755581	TUSA, MOAE, MOAB, FDHD, MOEA, NAPA	609	13	3277	2.48352	1	0.902779	69.5019
GOTERM_BP_DIRECT	GO:0006289~nucleotide-excision repair	4	0.593472	0.0817357	MUTM, UVRD, UVRA, UVRB	609	6	3277	3.5873	1	0.91183	72.4413
GOTERM_BP_DIRECT	GO:0044209~AMP salvage	3	0.445104	0.0904097	ADK, APT, AMN	609	3	3277	5.38095	1	0.925354	76.1242
GOTERM_BP_DIRECT	GO:0042780~tRNA 3'-end processing	3	0.445104	0.0904097	RNT, RND, RPH	609	3	3277	5.38095	1	0.925354	76.1242
GOTERM_BP_DIRECT	GO:0016260~selenocysteine biosynthetic process	3	0.445104	0.0904097	SELA, SELD, SERS	609	3	3277	5.38095	1	0.925354	76.1242
GOTERM_BP_DIRECT	GO:0006002~fructose 6-phosphate metabolic process	3	0.445104	0.0904097	GLMS, FBP, PFKA	609	3	3277	5.38095	1	0.925354	76.1242
GOTERM_BP_DIRECT	GO:0032508~DNA duplex unwinding	5	0.74184	0.0964794	HELD, RUVA, UVRD, RECG, DING	609	10	3277	2.69048	1	0.931124	78.4222
GOTERM_BP_DIRECT	GO:0000105~histidine biosynthetic process	5	0.74184	0.0964794	HISH, HISC, HISB, HISA, FOLD	609	10	3277	2.69048	1	0.931124	78.4222
GOTERM_BP_DIRECT	GO:0009088~threonine biosynthetic process	4	0.593472	0.123859	THRA, THRB, ASD, THRC	609	7	3277	3.07483	1	0.965347	86.4478
GOTERM_BP_DIRECT	GO:0009102~biotin biosynthetic process	5	0.74184	0.130253	FABI, FABG, BIRA, MIOC, BIOD	609	11	3277	2.44589	1	0.967492	87.8681
GOTERM_BP_DIRECT	GO:0009423~chorismate biosynthetic process	5	0.74184	0.130253	AROK, AROD, AROC, AROB, AROA	609	11	3277	2.44589	1	0.967492	87.8681
GOTERM_BP_DIRECT	GO:0065002~intracellular protein transmembrane transport	5	0.74184	0.130253	SECD, SKP, SECF, TATA, SECY	609	11	3277	2.44589	1	0.967492	87.8681
GOTERM_BP_DIRECT	GO:0008652~cellular amino acid biosynthetic process	11	1.63205	0.132583	TRPB, AROK, TRPD, CYSE, AROD, ASNB, AROC, AROB, AROA, SERB, TRPA	609	37	3277	1.59974	1	0.965807	88.3503
GOTERM_BP_DIRECT	GO:0051289~protein homotetramerization	7	1.03858	0.150504	FABI, POXB, NAGA, FBP, PYKA, CMOB, PFKA	609	20	3277	1.88333	1	0.976395	91.5028
GOTERM_BP_DIRECT	GO:0006090~pyruvate metabolic process	3	0.445104	0.158901	ACEF, POXB, PPSA	609	4	3277	4.03571	1	0.978726	92.6875
GOTERM_BP_DIRECT	GO:0005978~glycogen biosynthetic process	3	0.445104	0.158901	GLGB, GLGC, GLGA	609	4	3277	4.03571	1	0.978726	92.6875
GOTERM_BP_DIRECT	GO:0042274~ribosomal small subunit biogenesis	3	0.445104	0.158901	RIMP, YBEY, ERA	609	4	3277	4.03571	1	0.978726	92.6875
GOTERM_BP_DIRECT	GO:0030632~D-alanine biosynthetic process	3	0.445104	0.158901	ALAC, AVTA, ALR	609	4	3277	4.03571	1	0.978726	92.6875
GOTERM_BP_DIRECT	GO:0060702~negative regulation of endoribonuclease activity	3	0.445104	0.158901	RPLD, RRAA, RRAB	609	4	3277	4.03571	1	0.978726	92.6875
GOTERM_BP_DIRECT	GO:0006189~'de novo' IMP biosynthetic process	5	0.74184	0.168104	PURH, PURL, PURM, PURC, PURU	609	12	3277	2.24206	1	0.981145	93.8077
GOTERM_BP_DIRECT	GO:0009089~lysine biosynthetic process via diaminopimelate	5	0.74184	0.168104	DAPA, THRA, ASD, DAPE, DAPD	609	12	3277	2.24206	1	0.981145	93.8077
GOTERM_BP_DIRECT	GO:0006629~lipid metabolic process	4	0.593472	0.171921	TESA, GLPQ, UGPQ, YBGC	609	8	3277	2.69048	1	0.980755	94.2236
GOTERM_BP_DIRECT	GO:0006113~fermentation	4	0.593472	0.171921	FRDB, HYAC, MDH, HYAB	609	8	3277	2.69048	1	0.980755	94.2236
GOTERM_BP_DIRECT	GO:0042254~ribosome biogenesis	4	0.593472	0.171921	RPLJ, RPMJ, RPSM, YBEY	609	8	3277	2.69048	1	0.980755	94.2236
GOTERM_BP_DIRECT	GO:0006206~pyrimidine nucleobase metabolic process	4	0.593472	0.171921	RIHC, UPP, PRKB, DEOA	609	8	3277	2.69048	1	0.980755	94.2236
GOTERM_BP_DIRECT	GO:0006730~one-carbon metabolic process	4	0.593472	0.171921	METK, FOLE, FOLD, PURU	609	8	3277	2.69048	1	0.980755	94.2236
GOTERM_BP_DIRECT	GO:0008033~tRNA processing	5	0.74184	0.209235	RNPA, RBN, RNT, RNE, RND	609	13	3277	2.0696	1	0.991567	97.1226
GOTERM_BP_DIRECT	GO:0045454~cell redox homeostasis	7	1.03858	0.210767	GRXB, AHPC, GRXD, GOR, TRXA, STHA, BCP	609	22	3277	1.71212	1	0.990733	97.2057
GOTERM_BP_DIRECT	GO:0006979~response to oxidative stress	11	1.63205	0.216857	SUFA, MSRB, MSRA, KATG, ACNA, ICD, WRBA, BCP, AZOR, SODA, SUFD	609	41	3277	1.44367	1	0.990939	97.5145
GOTERM_BP_DIRECT	GO:0030091~protein repair	4	0.593472	0.224144	MSRB, MSRA, HCHA, PCM	609	9	3277	2.39153	1	0.991393	97.842
GOTERM_BP_DIRECT	GO:0009061~anaerobic respiration	14	2.07715	0.227217	FRDB, GLPA, FDNG, MDH, NAPA, GLPD, GLPC, NDH, ERPA, ACNA, DLD, HYAC, HYAB, FDOG	609	56	3277	1.34524	1	0.990957	97.9677
GOTERM_BP_DIRECT	GO:0051454~intracellular pH elevation	3	0.445104	0.233315	GADC, GADB, GADA	609	5	3277	3.22857	1	0.991166	98.197
GOTERM_BP_DIRECT	GO:0031167~rRNA methylation	3	0.445104	0.233315	RLML, RSMC, RLMI	609	5	3277	3.22857	1	0.991166	98.197
GOTERM_BP_DIRECT	GO:0000453~enzyme-directed rRNA 2'-O-methylation	3	0.445104	0.233315	RSMI, RLMM, RLMB	609	5	3277	3.22857	1	0.991166	98.197
GOTERM_BP_DIRECT	GO:0006400~tRNA modification	3	0.445104	0.233315	ALAS, MIAA, TILS	609	5	3277	3.22857	1	0.991166	98.197
GOTERM_BP_DIRECT	GO:0000917~barrier septum assembly	5	0.74184	0.298005	ZAPD, NLPD, ZAPB, ZAPA, MINC	609	15	3277	1.79365	1	0.997855	99.5243
GOTERM_BP_DIRECT	GO:0007059~chromosome segregation	5	0.74184	0.298005	FTSK, GYRA, PARE, GYRB, PARC	609	15	3277	1.79365	1	0.997855	99.5243

## Sheet: GO_CC
Category	Term	Count	%	PValue	Genes	List Total	Pop Hits	Pop Total	Fold Enrichment	Bonferroni	Benjamini	FDR
GOTERM_CC_DIRECT	GO:0005829~cytosol	385	57.1217	1.2987e-65	FDHD, SRMB, APT, GLTA, PGL, PGK, SSPA, GLTX, RNR, RNT, OTSA, ARGS, LIGA, SLMA, RIBB, ELBB, ARGH, PURR, ASD, MANA, PURM, RBFA, PURU, RPSU, PTSI, ZAPD, MOAE, ZAPB, ZAPA, MOAB, PPSA, HFQ, MANX, RPSD, RPSC, FOLX, GUAD, GUAC, GRXB, RPSR, RPE, FOLP, GUAA, GRXD, GUAB, RPSM, RPSO, RPSI, RPSJ, PCNB, RPSK, RPSE, FOLE, RPSF, NAGZ, RPSG, FOLD, RPSH, RPH, TSAB, TSAD, METJ, MSRB, METK, MSRA, METH, YEIP, METG, …	582	1033	2941	1.88336	1.12987e-63	1.12987e-63	1.40358e-62
GOTERM_CC_DIRECT	GO:0022625~cytosolic large ribosomal subunit	27	4.00593	8.29629e-14	RPLJ, RPMJ, RPLK, RPLL, RPLM, RPLF, RPLI, RPLB, RPMA, RPMB, RPLC, RPLD, RPLE, RPME, RPMF, RPMC, RPMD, RPLA, RPLY, RPLW, RPLV, RPLQ, RPLO, RPLN, RPLT, RPLS, RPLR	582	32	2941	4.26369	7.21523e-12	3.60756e-12	8.96283e-11
GOTERM_CC_DIRECT	GO:0016020~membrane	69	10.2374	8.35917e-08	COPA, ENO, UPP, CRR, MSBA, FRDB, CLPB, MALF, CSPC, ALAS, FABI, ALSB, PANB, ACEE, GOR, HDA, NUOB, METG, PFLB, TRKA, ATPA, AHPC, ACKA, TIG, TYRS, RBSB, PURC, PURA, CYDA, GAPA, LYSS, PYRD, TNAA, FDOG, EDA, TPIA, GADB, NAPH, FTSK, FDNG, MDH, GYRA, USPA, DJLA, GADA, INFC, HYAB, PPA, MANX, CREC, MANZ, RPSA, TSF, CLSB, RPOC, LPP, GLNA, RPOB, RPOA, WRBA, DEOD, BAME, DEOC, ADHE, DEOA, RPSG, SODB, RHO, GROL	582	191	2941	1.82552	7.27245e-06	2.42416e-06	9.03425e-05
GOTERM_CC_DIRECT	GO:0022627~cytosolic small ribosomal subunit	18	2.67062	1.9077e-07	RPSB, RPSA, RPSD, RPSC, RPSU, RPSR, RPSM, RPSN, RPSO, RPSP, RPSI, RPSJ, RPSK, RPSE, RAIA, RPSF, RPSG, RPSH	582	25	2941	3.63835	1.65969e-05	4.14925e-06	0.000206177
GOTERM_CC_DIRECT	GO:0005694~chromosome	6	0.890208	0.00436518	TOPA, IHFB, GYRA, PARE, GYRB, PARC	582	7	2941	4.33137	0.31655	0.0732954	4.61801
GOTERM_CC_DIRECT	GO:0009330~DNA topoisomerase complex (ATP-hydrolyzing)	4	0.593472	0.02618	GYRA, PARE, GYRB, PARC	582	4	2941	5.05326	0.900541	0.319323	24.9273
GOTERM_CC_DIRECT	GO:0005737~cytoplasm	123	18.2493	0.0483098	FABZ, ALAC, THRC, DCYD, RLML, RLMM, THRS, GOR, NUOB, FUCU, UVRY, CUTC, RLMI, CUTA, TMK, ARGE, YCBZ, FRR, SIXA, UVRB, POLA, ARGR, ARGS, GPMA, RNE, RND, RIBA, AROB, UBIE, PTRA, YEGS, RUVA, PLSX, MDH, GYRA, GYRB, SERS, MOAB, DNAG, COBB, ARNB, TRPR, MANX, SERB, RPSA, MUG, TSF, GARL, PHES, FOLP, MOBA, YBEY, PCNB, OMPR, IADA, FOLE, YAFD, PCM, GLPK, ACEF, METH, HEMC, ACNA, KBL, GRCA, CMOB, GLPX, PARC, S…	582	544	2941	1.14256	0.986538	0.45958	41.4416
GOTERM_CC_DIRECT	GO:0009331~glycerol-3-phosphate dehydrogenase complex	4	0.593472	0.0559019	GPSA, GLPA, GLPD, GLPC	582	5	2941	4.04261	0.993294	0.465052	46.2974
GOTERM_CC_DIRECT	GO:0032153~cell division site	9	1.33531	0.146635	ZAPD, TOLR, NLPD, ZAPB, ZAPA, TOLA, DEDD, TOLB, FTSA	582	27	2941	1.68442	0.999999	0.784075	81.9809
GOTERM_CC_DIRECT	GO:0009986~cell surface	3	0.445104	0.176945	ENO, BAMC, FLU	582	4	2941	3.78995	1	0.816249	87.8105
GOTERM_CC_DIRECT	GO:0009295~nucleoid	5	0.74184	0.293164	GYRA, PARE, GYRB, PARC, CBPA	582	14	2941	1.80474	1	0.935695	97.6477

## Sheet: GO_MF
Category	Term	Count	%	PValue	Genes	List Total	Pop Hits	Pop Total	Fold Enrichment	Bonferroni	Benjamini	FDR
GOTERM_MF_DIRECT	GO:0003735~structural constituent of ribosome	45	6.67656	2.12269e-21	RPLJ, RPLK, RPLL, RPLM, RPLF, RPLI, RPLB, RPLC, RPLD, RPLE, RPSU, RPLA, RPSB, RPMJ, RPSA, RPSD, RPSC, RPMH, RPMA, RPMB, RPME, RPMF, RPMC, RPMD, RPLY, RPSR, RPLW, RPLV, RPSM, RPSN, RPSO, RPSP, RPSI, RPLQ, RPSJ, RPLO, RPSK, RPLN, RPSE, RPSF, RPLT, RPLS, RPSG, RPLR, RPSH	618	57	3186	4.07001	1.54956e-18	1.54956e-18	3.21912e-18
GOTERM_MF_DIRECT	GO:0042802~identical protein binding	95	14.095	4.25225e-10	FABZ, TDCF, ENO, UPP, TSAB, TSAD, CLPB, NANA, ALAS, FABI, PANC, METK, TESA, FABG, ACEE, HDA, KATG, APT, DXR, CODA, HEML, CMOB, GLTA, AHPC, TIG, PEPB, DNAX, CLPX, TRPB, PYRG, MURD, PYRH, TOLC, TNAA, AROD, AROC, SLMA, RIBB, EDA, UBID, HSLO, PEPP, PFKA, LPTC, TPIA, FTSK, GND, ISPF, GYRA, USPA, TATA, ILVE, ZWF, SERS, MINC, ZAPD, ZAPB, TRMD, ZAPA, MOAB, DNAT, ACCA, TILS, LPXD, STHA, ASNB, CDD, PYKA, R…	618	272	3186	1.80058	3.10414e-07	1.55207e-07	6.44867e-07
GOTERM_MF_DIRECT	GO:0005515~protein binding	198	29.3769	4.64086e-10	ENO, FDHD, MALF, SRMB, PANC, ROF, GLTA, ATPA, SSPA, FRR, UVRD, UVRA, RNR, UVRB, MNMG, RECA, RBSB, RECF, RBSA, RLUD, RNE, RLUB, SLMA, RIBA, YACL, PURR, TPIA, MANA, GYRA, GYRB, GADA, ZAPD, PTSI, MOAE, ZAPB, ZAPA, RCSF, HFQ, RPSB, RPSD, SKP, GUAC, PLSB, MUTL, RPSR, SAPF, RPE, GRXD, MOBA, DEGS, RPSJ, RPSE, RPSF, RPSG, SBCC, SFSA, TSAB, FRDB, TSAD, FEPA, YCFP, METN, METK, METG, METE, HEML, PARC, SLYD,…	618	712	3186	1.43365	3.38783e-07	1.12928e-07	7.03801e-07
GOTERM_MF_DIRECT	GO:0019843~rRNA binding	25	3.7092	1.41194e-08	RPLK, RPSD, RPSC, RPLF, RPMA, RPLB, RPLC, RPLD, RPME, RPMC, RPLA, RLMN, RPLW, RPLV, RPSM, RPSN, RMF, RPSO, RPLO, RPSE, RAIA, RPLT, RPSG, RPLS, RPSH	618	40	3186	3.22209	1.03071e-05	2.57678e-06	2.14125e-05
GOTERM_MF_DIRECT	GO:0008270~zinc ion binding	58	8.60534	2.54271e-07	HCHA, DEF, GLPK, ALAS, MSRB, HTPX, METH, THRS, METG, METE, TGT, CODA, SLYD, ARGE, ACKA, PEPD, GLTX, UVRA, RPME, CLPX, RBN, PYRC, RNE, RIBA, AROB, PTRA, ADD, RPLM, MANA, LPXC, FUR, RPLB, ISPF, TLDD, HYPF, NRDR, NAGK, ACCD, NAGA, DNAG, CDD, COBB, PPA, NRDD, NUDC, RPSB, TSF, RPOA, ILES, DAPE, GUAD, MUTM, TDK, CYSS, DKSA, YBEY, FOLE, IADA	618	157	3186	1.90452	0.000185601	3.71229e-05	0.000385609
GOTERM_MF_DIRECT	GO:0003723~RNA binding	32	4.74777	7.7578e-06	RPLF, RLMB, CSPE, RPLD, CSPA, RPLA, CSPC, RLML, THRS, GLNS, RLMD, TRUD, TRML, HFQ, PROS, TRMJ, RSUA, RLMJ, RLMI, RPSA, GLTX, RNR, NUSB, TYRS, RSMB, YBCJ, RLUD, RNE, PCNB, RLUB, YHBY, RHO	618	75	3186	2.19961	0.00564721	0.000943424	0.0117643
GOTERM_MF_DIRECT	GO:0000287~magnesium ion binding	58	8.60534	2.41956e-05	GPH, ENO, UPP, TSAD, PRS, METK, PANB, APT, DXS, PARE, GLGC, TOPA, ACKA, THIL, RNT, KDSB, PURA, MURC, AROK, TRPD, LYSS, ADK, RNE, UGPQ, ULAD, GSHB, RIBB, PFKA, YEGS, CCA, GYRB, BIOD, ILVC, SERS, PTSI, TRMD, NUDL, DNAG, PPSA, PPC, PPA, PYKA, NUDC, SERB, MENC, MEND, GLNE, POXB, GARL, ICD, FBP, PHES, MOBA, GPT, GLMM, DEOB, SELD, GROL	618	178	3186	1.67983	0.0175079	0.00252011	0.0366871
GOTERM_MF_DIRECT	GO:0005524~ATP binding	116	17.2107	5.11384e-05	THRA, RADA, THRB, CLPB, SRMB, ALAS, PANC, THRS, MFD, GNTK, PGK, TMK, ATPA, ACKA, YCBZ, UVRD, THII, GLTX, THIL, RELA, UVRA, UVRB, RECA, RECG, RECF, RBSA, DNAX, CLPX, ARGS, AROK, UBIB, LYSS, YAJQ, PRKB, YEGS, MIAA, DNAA, RUVA, PURM, GYRA, GYRB, NAGK, NRDR, BIOD, SERS, GLNS, PPSA, RCSC, NRDD, PYKA, GLNL, GMK, GLNE, LEUS, GLNA, CMK, MUTL, PHES, FRUK, GUAA, SAPF, SAPD, TDK, ISPE, PCNB, GLK, SBCC, RHO,…	618	433	3186	1.38111	0.0366437	0.00465563	0.0775249
GOTERM_MF_DIRECT	GO:0000049~tRNA binding	18	2.67062	0.00013123	THII, GLTX, RPMA, CCA, RPLE, ILES, RPLA, ALAS, PHES, RLMN, RNPA, RPSM, METG, DUSA, YAJQ, RPSI, RPSJ, RPSG	618	36	3186	2.57767	0.091358	0.0105884	0.198829
GOTERM_MF_DIRECT	GO:0048027~mRNA 5'-UTR binding	5	0.74184	0.00590235	RPSR, RPSD, RPSK, CSRA, RPSF	618	5	3186	5.15534	0.98672	0.350887	8.58642
GOTERM_MF_DIRECT	GO:0003729~mRNA binding	6	0.890208	0.0169421	RPSA, RPLM, RPSC, ACCD, ACNA, RPSG	618	9	3186	3.43689	0.999996	0.678247	22.828
GOTERM_MF_DIRECT	GO:0030170~pyridoxal phosphate binding	19	2.81899	0.0183464	ALAC, GADB, THRC, PABC, DCYD, ALR, CSDA, ILVE, GADA, TRPA, TRPB, SELA, HISC, TNAA, AVTA, KBL, ARNB, HEML, SERC	618	57	3186	1.71845	0.999999	0.675814	24.483
GOTERM_MF_DIRECT	GO:0070180~large ribosomal subunit rRNA binding	4	0.593472	0.0247516	RPLJ, RPLK, RPLI, RPLN	618	4	3186	5.15534	1	0.755219	31.62
GOTERM_MF_DIRECT	GO:0003918~DNA topoisomerase type II (ATP-hydrolyzing) activity	4	0.593472	0.0247516	GYRA, PARE, GYRB, PARC	618	4	3186	5.15534	1	0.755219	31.62
GOTERM_MF_DIRECT	GO:0001072~transcription antitermination factor activity, RNA binding	4	0.593472	0.0247516	CSPE, RPSJ, CSPA, CSPC	618	4	3186	5.15534	1	0.755219	31.62
GOTERM_MF_DIRECT	GO:0043024~ribosomal small subunit binding	6	0.890208	0.0285713	RMF, LEPA, RAIA, RBFA, ERA, YQJD	618	10	3186	3.0932	1	0.779419	35.5708
GOTERM_MF_DIRECT	GO:0050661~NADP binding	10	1.48368	0.029384	PNTB, FABG, THRA, GOR, ASD, GAPA, PNTA, WRBA, ZWF, ILVC	618	24	3186	2.14806	1	0.76577	36.3834
GOTERM_MF_DIRECT	GO:0008237~metallopeptidase activity	7	1.03858	0.0711331	ARGE, DCP, TSAB, TLDD, DAPE, IADA, PTRA	618	16	3186	2.25546	1	0.965495	67.3409
GOTERM_MF_DIRECT	GO:0070181~small ribosomal subunit rRNA binding	4	0.593472	0.091053	RPSR, RPSK, ERA, RPSF	618	6	3186	3.43689	1	0.98342	76.4915
GOTERM_MF_DIRECT	GO:0008094~DNA-dependent ATPase activity	4	0.593472	0.091053	RADA, GYRA, RECA, GYRB	618	6	3186	3.43689	1	0.98342	76.4915
GOTERM_MF_DIRECT	GO:0003899~DNA-directed RNA polymerase activity	4	0.593472	0.091053	RPOC, RPOB, RPOA, RPOZ	618	6	3186	3.43689	1	0.98342	76.4915
GOTERM_MF_DIRECT	GO:0000900~translation repressor activity, nucleic acid binding	3	0.445104	0.0978961	RPSD, THRS, RPLT	618	3	3186	5.15534	1	0.984675	79.0371
GOTERM_MF_DIRECT	GO:0008235~metalloexopeptidase activity	3	0.445104	0.0978961	PEPA, PEPB, PEPP	618	3	3186	5.15534	1	0.984675	79.0371
GOTERM_MF_DIRECT	GO:0060698~endoribonuclease inhibitor activity	3	0.445104	0.0978961	RPLD, RRAA, RRAB	618	3	3186	5.15534	1	0.984675	79.0371
GOTERM_MF_DIRECT	GO:0008097~5S rRNA binding	3	0.445104	0.0978961	RPLY, RPLE, RPLR	618	3	3186	5.15534	1	0.984675	79.0371
GOTERM_MF_DIRECT	GO:0015616~DNA translocase activity	3	0.445104	0.0978961	FTSK, UVRD, MFD	618	3	3186	5.15534	1	0.984675	79.0371
GOTERM_MF_DIRECT	GO:0051287~NAD binding	13	1.92878	0.111584	GPSA, FABG, MAEA, ASD, GAPA, CYSG, DLD, PNTA, ICD, GARR, NADK, WRBA, WECC	618	43	3186	1.55859	1	0.989388	83.3754
GOTERM_MF_DIRECT	GO:0003697~single-stranded DNA binding	7	1.03858	0.117267	MUTL, YCBZ, CSPE, RECA, RECF, CSPA, CSPC	618	18	3186	2.00485	1	0.989462	84.9171
GOTERM_MF_DIRECT	GO:0030145~manganese ion binding	16	2.37389	0.122661	MEND, TKTA, FUCI, UXUA, ISPF, PEPA, PEPB, NUDL, DXR, GSHB, RIBB, DEOB, GLPX, SODA, PEPP, NUDC	618	57	3186	1.44711	1	0.989422	86.256
GOTERM_MF_DIRECT	GO:0005525~GTP binding	15	2.22552	0.129743	UPP, RELA, FUSA, ERA, PURA, DER, PRFC, MOBA, MOAB, YAJQ, LEPA, FTSY, RIBA, FOLE, FFH	618	53	3186	1.45906	1	0.99006	87.8456
GOTERM_MF_DIRECT	GO:0016874~ligase activity	4	0.593472	0.137081	LYSS, YGIC, KBL, CYSS	618	7	3186	2.94591	1	0.990716	89.3102
GOTERM_MF_DIRECT	GO:0008289~lipid binding	4	0.593472	0.137081	POXB, MSBA, LPP, ATPE	618	7	3186	2.94591	1	0.990716	89.3102
GOTERM_MF_DIRECT	GO:0005506~iron ion binding	16	2.37389	0.137479	MIAB, NAPH, LPXC, TSAD, FEPA, ISPG, NAPA, MSRB, LUXS, NUOB, ACNA, HYAC, RLMD, RLMC, RIMO, SODB	618	58	3186	1.42216	1	0.988874	89.3847
GOTERM_MF_DIRECT	GO:0043022~ribosome binding	8	1.18694	0.14007	DER, INFC, PRFA, DEF, RMF, LEPA, TIG, RAIA	618	23	3186	1.79316	1	0.987801	89.8583
GOTERM_MF_DIRECT	GO:0008276~protein methyltransferase activity	3	0.445104	0.171041	METH, METE, PRMB	618	4	3186	3.8665	1	0.99484	94.1852
GOTERM_MF_DIRECT	GO:0001141~transcriptional repressor activity, bacterial-type RNA polymerase core promoter proximal region sequence-specific binding	3	0.445104	0.171041	ALAS, PUTA, LACI	618	4	3186	3.8665	1	0.99484	94.1852
GOTERM_MF_DIRECT	GO:0016790~thiolester hydrolase activity	3	0.445104	0.171041	YBFF, HCHA, YBGC	618	4	3186	3.8665	1	0.99484	94.1852
GOTERM_MF_DIRECT	GO:0004540~ribonuclease activity	3	0.445104	0.171041	RNR, RNE, RND	618	4	3186	3.8665	1	0.99484	94.1852
GOTERM_MF_DIRECT	GO:0017111~nucleoside-triphosphatase activity	3	0.445104	0.171041	YJJX, NUDJ, DNAX	618	4	3186	3.8665	1	0.99484	94.1852
GOTERM_MF_DIRECT	GO:0003681~bent DNA binding	3	0.445104	0.171041	ARGP, HFQ, CBPA	618	4	3186	3.8665	1	0.99484	94.1852
GOTERM_MF_DIRECT	GO:0008757~S-adenosylmethionine-dependent methyltransferase activity	5	0.74184	0.188504	PRMB, CMOA, UBIE, CMOB, UBIG	618	12	3186	2.14806	1	0.996473	95.7898
GOTERM_MF_DIRECT	GO:0043023~ribosomal large subunit binding	4	0.593472	0.189073	FRR, LEPA, RSFS, RATA	618	8	3186	2.57767	1	0.995763	95.8344
GOTERM_MF_DIRECT	GO:0016810~hydrolase activity, acting on carbon-nitrogen (but not peptide) bonds	4	0.593472	0.189073	YIBQ, YOBB, IADA, LNT	618	8	3186	2.57767	1	0.995763	95.8344
GOTERM_MF_DIRECT	GO:0008483~transaminase activity	4	0.593472	0.189073	ALAC, AVTA, HEML, ARNB	618	8	3186	2.57767	1	0.995763	95.8344
GOTERM_MF_DIRECT	GO:0003746~translation elongation factor activity	4	0.593472	0.189073	TSF, YEIP, LEPA, FUSA	618	8	3186	2.57767	1	0.995763	95.8344
GOTERM_MF_DIRECT	GO:0008233~peptidase activity	6	0.890208	0.220096	PEPE, DEGQ, TESA, LEPB, DEGS, YEGQ	618	17	3186	1.81953	1	0.998084	97.6945
GOTERM_MF_DIRECT	GO:0008198~ferrous iron binding	7	1.03858	0.241649	SUFA, ERPA, RPE, DEF, UXUA, FUCO, CODA	618	22	3186	1.64034	1	0.998806	98.4927
GOTERM_MF_DIRECT	GO:0016783~sulfurtransferase activity	4	0.593472	0.245003	TUSA, THII, FDHD, CSDA	618	9	3186	2.29126	1	0.998664	98.5907
GOTERM_MF_DIRECT	GO:0042834~peptidoglycan binding	3	0.445104	0.249717	LPP, DEDD, RLPA	618	5	3186	3.0932	1	0.998576	98.7184
GOTERM_MF_DIRECT	GO:0016597~amino acid binding	8	1.18694	0.257345	ALAS, THRA, GLND, RELA, ASNB, TYRR, PURU, SPOT	618	27	3186	1.52751	1	0.998614	98.9024
