# Supplementary material for: Proteomics and metabolomics analysis reveal potential mechanism of extended-spectrum β-lactamase production in Escherichia coli
Source: RSC Adv. 2020 Jul 17;10(45):26862–73. doi: 10.1039/d0ra04250a (PMC9055503; doi:10.1039/d0ra04250a)
Supplement: RA-010-D0RA04250A-s007 [file RA-010-D0RA04250A-s007.xlsx]

## Sheet: file explanation
Abbreviation	Description
GeneName	The corresponding gene number of the protein
Accession	The protein ID in the database
Description	Description of the protein
Coverage	Coverage of protein amino acid
#.Proteins	Number of proteins in the protein Group (when the gene and protein sequence are similar, and the data in the experiment cannot completely distinguish these proteins, the software classifies them into 1 Group)
#.Unique.Peptides	The number of unique matched peptides (that is, other proteins that do not have these sequences which are unique to the identified protein)
#.Peptides	The number of matched peptide segments
#.PSMs	The number of times a peptide segment is identified (Identified times of peptides)
#.AAs	The number of amino acids contained in whole protein theoretically
MW.[kDa]	Molecular weight of protein
calc..pI	The calculated isoelectric point of the protein
MEAN	The relative quantitative mean of the protein
P-VALUE	P = probability of correct hypothesis but rejected = number of negative results/total number of results, which is a test probability for and sample data
Q-VALUE	Adjusted p value
FOLD CHANGE	Protein fold change in two groups

## Sheet: B vs A
GeneName	Accession	Description	Score	Coverage	#.Proteins	#.Unique.Peptides	#.Peptides	#.PSMs	#.AAs	MW.[kDa]	calc..pI	MEAN B	MEAN A	P-VALUE	Q-VALUE	FOLD CHANGE	LOG_FOLDCHANGE
tig	A1A8A5	Trigger factor OS=Escherichia coli O1:K1 / APEC OX=405955 GN=tig PE=3 SV=1 - [TIG_ECOK1]	6854.93	65.5	3	2	28	235	429	47.8357	4.88135	0.00133135	0.000292967	0.0438448	0.0146591	4.54438	2.18408
C3K24_14785	A0A2L0MME0	Ribose ABC transporter substrate-binding protein RbsB OS=Escherichia coli OX=562 GN=C3K24_14785 PE=4 SV=1 - [A0A2L0MME0_ECOLX]	1979.25	65.54	4	1	13	68	296	30.9203	6.82959	0.00127575	0.000305588	0.0285839	0.0113814	4.17473	2.06168
BX51_11375	A0A025CG76	Uncharacterized protein OS=Escherichia coli O145:NM str. 2010C-3526 OX=1446596 GN=BX51_11375 PE=4 SV=1 - [A0A025CG76_ECOLX]	2332.08	50.5	10	1	6	68	101	11.0439	9.40771	0.00104573	0.000266686	0.000624366	0.00144118	3.9212	1.9713
G943_02217	T9DWT8	Uncharacterized protein OS=Escherichia coli UMEA 3212-1 OX=1281218 GN=G943_02217 PE=4 SV=1 - [T9DWT8_ECOLX]	939.451	56.93	8	1	6	28	137	14.9907	5.10986	0.00111861	0.000330167	0.00191744	0.00245034	3.38802	1.76044
ccdA	A0A0F6YRL5	Antitoxin CcdA OS=Escherichia coli O104:H7 OX=1619910 GN=ccdA PE=4 SV=1 - [A0A0F6YRL5_ECOLX]	55.2235	37.5	13	2	2	2	72	8.39508	5.10986	0.000899876	0.000291023	0.0389286	0.0137082	3.09212	1.62859
artM_3	A0A0K3MNI0	L-cystine ABC transporter ATP-binding protein YecC OS=Escherichia coli OX=562 GN=artM_3 PE=4 SV=1 - [A0A0K3MNI0_ECOLX]	210.649	25.6	10	1	5	12	250	27.6579	9.43701	0.000702573	0.000293555	0.0401415	0.013948	2.39332	1.25902
BET08_36210	A0A1V2T5K0	Hydrolase (Fragment) OS=Escherichia coli OX=562 GN=BET08_36210 PE=4 SV=1 - [A0A1V2T5K0_ECOLX]	159.944	43.45	47	1	5	9	145	15.7532	5.52881	0.000672888	0.000289011	0.00565536	0.00425618	2.32824	1.21924
Q609_ECAC00354G0001	W1XD85	Dipeptide transport system permease protein dppB (Fragment) OS=Escherichia coli DORA_A_5_14_21 OX=1403943 GN=Q609_ECAC00354G0001 PE=3 SV=1 - [W1XD85_ECOLX]	34.99	3.25	21	1	1	1	246	26.8036	9.24658	0.000957959	0.000416113	0.0108177	0.00631135	2.30216	1.20299
gltX	A0A0B5HLG4	Glutamate--tRNA ligase OS=Escherichia coli OX=562 GN=gltX PE=3 SV=1 - [A0A0B5HLG4_ECOLX]	1403.3	47.13	13	1	17	68	471	53.7808	6.01123	0.00068785	0.000304903	0.0438027	0.014651	2.25596	1.17374
trmB	A0A026UTB7	tRNA (guanine-N(7)-)-methyltransferase OS=Escherichia coli O174:H8 str. 04-3038 OX=1446704 GN=trmB PE=3 SV=1 - [A0A026UTB7_ECOLX]	128.51	16.32	24	1	3	9	239	27.3217	6.91748	0.000707735	0.000315873	0.0315945	0.0121086	2.24056	1.16386
WG5_02243	S0XQT1	Uncharacterized protein OS=Escherichia coli KTE37 OX=1169354 GN=WG5_02243 PE=4 SV=1 - [S0XQT1_ECOLX]	34.68	3.39	2	1	1	1	354	41.0047	8.33838	0.0006014	0.000328498	0.0310295	0.0119763	1.83076	0.872442
sodA	B7UNM9	Superoxide dismutase OS=Escherichia coli O127:H6 (strain E2348/69 / EPEC) OX=574521 GN=sodA PE=3 SV=1 - [B7UNM9_ECO27]	1238.72	61.17	50	11	11	87	206	23.0797	6.96143	0.000503319	0.000299055	0.0115559	0.00657207	1.68303	0.751064
glcE	A0A025CUC1	Glycolate oxidase OS=Escherichia coli O145:NM str. 2010C-3526 OX=1446596 GN=glcE PE=4 SV=1 - [A0A025CUC1_ECOLX]	56.28	6.86	82	2	2	2	350	38.1543	6.53662	0.000458231	0.000294289	0.0242112	0.0102293	1.55707	0.638838
HMPREF1608_05198	V0X1Y8	Glycolate oxidase, subunit GlcD (Fragment) OS=Escherichia coli 908525 OX=1268995 GN=HMPREF1608_05198 PE=4 SV=1 - [V0X1Y8_ECOLX]	31.93	1.83	78	1	1	1	437	46.7882	4.91943	0.000450721	0.000309972	0.00270091	0.00294329	1.45407	0.540097
hisA	A0A1Q6BHD5	1-(5-phosphoribosyl)-5-[(5-phosphoribosylamino)methylideneamino] imidazole-4-carboxamide isomerase OS=Escherichia coli OX=562 GN=hisA PE=3 SV=1 - [A0A1Q6BHD5_ECOLX]	476.849	29.8	15	1	6	15	245	26.0286	5.19873	0.000412862	0.00028598	0.0160777	0.00800264	1.44367	0.529744
A1WS_02877	S1I366	Glutathione S-transferase OS=Escherichia coli KTE107 OX=1182703 GN=A1WS_02877 PE=4 SV=1 - [S1I366_ECOLX]	116.988	41.12	9	1	9	18	214	24.2815	5.61768	0.000435405	0.000318143	0.0481127	0.0154623	1.36858	0.452684
AWP75_25425	A0A1Q6B4A4	Isochorismatase OS=Escherichia coli OX=562 GN=AWP75_25425 PE=4 SV=1 - [A0A1Q6B4A4_ECOLX]	21.39	20.7	6	1	5	5	285	32.5623	5.32568	0.000433732	0.000337304	0.0289873	0.0114821	1.28588	0.362757
BU64_33950	A0A070EUY5	Mannosyl-3-phosphoglycerate phosphatase OS=Escherichia coli O128:H2 str. 2011C-3317 OX=1446581 GN=BU64_33950 PE=3 SV=1 - [A0A070EUY5_ECOLX]	77.7192	23.25	107	6	6	11	271	30.4354	5.08447	0.000400189	0.00031408	0.0032511	0.00323163	1.27416	0.349549
HMPREF9552_02758	D7X7Y8	Glycosyl hydrolase, family 31 OS=Escherichia coli MS 198-1 OX=749549 GN=HMPREF9552_02758 PE=3 SV=1 - [D7X7Y8_ECOLX]	31.99	2.19	120	1	1	1	365	41.0517	5.8335	0.000234048	0.000282763	0.0258992	0.0106834	0.827719	-0.272788
ydhF	A0A029HYI5	Oxidoreductase YdhF OS=Escherichia coli 2-005-03_S4_C3 OX=1444258 GN=ydhF PE=4 SV=1 - [A0A029HYI5_ECOLX]	387.982	31.54	52	9	9	21	298	33.6684	6.17627	0.000248918	0.000303268	0.0380469	0.0135297	0.820785	-0.284923
mrdB	A0A1X3I7Y1	Peptidoglycan glycosyltransferase MrdB OS=Escherichia coli M056 OX=656415 GN=mrdB PE=3 SV=1 - [A0A1X3I7Y1_ECOLX]	55.08	6.75	14	1	1	1	326	35.5406	9.53955	0.000258134	0.000314733	0.0480527	0.0154513	0.820168	-0.286009
eutC	F4THB2	Ethanolamine ammonia-lyase light chain OS=Escherichia coli M718 OX=656419 GN=eutC PE=3 SV=1 - [F4THB2_ECOLX]	54.4	13.57	51	4	4	6	258	27.9776	7.25439	0.000253421	0.00030917	0.0236702	0.0100961	0.819682	-0.286863
mraY	A0A0E1L523	Phospho-N-acetylmuramoyl-pentapeptide-transferase OS=Escherichia coli OX=562 GN=mraY PE=3 SV=1 - [A0A0E1L523_ECOLX]	29.16	5.11	19	2	2	2	352	38.887	9.70068	0.000239732	0.000293533	0.0117987	0.00665497	0.81671	-0.292103
C5N07_16150	A0A2S8I2N4	NADPH-dependent 2,4-dienoyl-CoA reductase OS=Escherichia coli OX=562 GN=C5N07_16150 PE=4 SV=1 - [A0A2S8I2N4_ECOLX]	153.104	16.37	51	1	11	11	672	72.6223	6.58057	0.000238393	0.000292211	0.0159854	0.00797447	0.815822	-0.293673
moaE	A0A1V2T4G4	Molybdenum cofactor biosynthesis protein MoaE (Fragment) OS=Escherichia coli OX=562 GN=moaE PE=4 SV=1 - [A0A1V2T4G4_ECOLX]	135.08	21.28	29	3	3	5	141	16.042	5.36377	0.000241265	0.000296343	0.0288462	0.011447	0.814143	-0.296646
ligA	A0A023L520	DNA ligase OS=Escherichia coli OX=562 GN=ligA PE=3 SV=1 - [A0A023L520_ECOLX]	523.765	38.3	78	21	21	44	671	73.5193	5.5415	0.000244693	0.000301468	0.0480143	0.0154444	0.811672	-0.301032
rapZ	A0A0E2L284	RNase adapter protein RapZ OS=Escherichia coli (strain UMEA 3162-1) OX=1281200 GN=rapZ PE=3 SV=1 - [A0A0E2L284_ECOU3]	154.235	36.97	16	9	9	16	284	32.4867	7.23975	0.000239784	0.000296699	0.0228445	0.00989188	0.808172	-0.307266
APT94_05210	A0A023LJK1	DUF469 domain-containing protein OS=Escherichia coli OX=562 GN=APT94_05210 PE=4 SV=1 - [A0A023LJK1_ECOLX]	481.326	33.33	24	3	3	22	108	12.8144	5.04639	0.000246359	0.000305187	0.0271679	0.0110194	0.807238	-0.308934
yfbU	A0A0T5XKZ7	UPF0304 protein YfbU OS=Escherichia coli OX=562 GN=yfbU PE=3 SV=1 - [A0A0T5XKZ7_ECOLX]	207.513	31.1	2	1	4	18	164	19.4524	6.63916	0.000239485	0.000297462	0.00242939	0.00278028	0.805095	-0.312769
BK248_10255	A0A0A1A4P2	Bifunctional nicotinamidase/pyrazinamidase OS=Escherichia coli OX=562 GN=BK248_10255 PE=4 SV=1 - [A0A0A1A4P2_ECOLX]	256.417	25.35	83	5	5	18	213	23.3053	4.84326	0.000241296	0.000300448	0.0164829	0.00812482	0.803123	-0.316307
APX71_09350	A0A2T8H741	23S rRNA (Adenine(2030)-N(6))-methyltransferase RlmJ OS=Escherichia coli OX=562 GN=APX71_09350 PE=4 SV=1 - [A0A2T8H741_ECOLX]	314.848	32.14	5	2	8	17	280	31.9397	8.90967	0.000253147	0.000315824	0.00633539	0.00454621	0.801545	-0.319145
CSC15_1518	A0A2T7Y933	LysR substrate binding domain protein OS=Escherichia coli OX=562 GN=CSC15_1518 PE=4 SV=1 - [A0A2T7Y933_ECOLX]	32.34	13.55	30	4	4	4	273	30.5239	6.93213	0.000240388	0.000299986	0.0374696	0.013411	0.801329	-0.319534
rne	A0A2A3W2F2	Ribonuclease E OS=Escherichia coli OX=562 GN=rne PE=3 SV=1 - [A0A2A3W2F2_ECOLX]	2464.99	45.99	65	1	39	114	1061	118.251	5.65576	0.00023863	0.000298212	0.0462022	0.0151088	0.800202	-0.321564
mug	A0A2B7M496	G/U mismatch-specific DNA glycosylase OS=Escherichia coli OX=562 GN=mug PE=3 SV=1 - [A0A2B7M496_ECOLX]	174.307	36.31	3	1	5	16	168	18.7329	9.0708	0.000249048	0.000313694	0.000729516	0.0015294	0.793919	-0.332937
C5P43_36715	A0A2S7HDF8	Transcriptional regulator (Fragment) OS=Escherichia coli OX=562 GN=C5P43_36715 PE=4 SV=1 - [A0A2S7HDF8_ECOLX]	40.24	16.67	43	2	2	2	108	12.3895	6.53662	0.000246839	0.000311224	0.0376637	0.0134511	0.793125	-0.334379
BIU72_08100	A0A0D8W7N4	ABC transporter family protein OS=Escherichia coli OX=562 GN=BIU72_08100 PE=4 SV=1 - [A0A0D8W7N4_ECOLX]	342.308	23.14	28	4	4	10	242	27.035	6.63916	0.000242998	0.000306643	0.0203527	0.00924464	0.792447	-0.335613
Ec53638_2284	A0A0E1T5X8	Transcriptional regulator, IclR family OS=Escherichia coli 53638 OX=344610 GN=Ec53638_2284 PE=4 SV=1 - [A0A0E1T5X8_ECOLX]	43.36	12.59	36	3	3	3	270	29.6862	6.90283	0.000243143	0.000307188	0.00984405	0.00594613	0.791512	-0.337317
C5P43_27250	A0A2S7HLY6	Cellulose biosynthesis regulator YedQ (Fragment) OS=Escherichia coli OX=562 GN=C5P43_27250 PE=4 SV=1 - [A0A2S7HLY6_ECOLX]	0	10.41	177	5	5	6	490	56.0956	7.37158	0.00023636	0.000299053	0.023491	0.0100516	0.790362	-0.339414
HMPREF9552_00794	D7X2G7	Putative regulatory protein GalF OS=Escherichia coli MS 198-1 OX=749549 GN=HMPREF9552_00794 PE=4 SV=1 - [D7X2G7_ECOLX]	697.52	36.9	173	7	7	29	271	29.8605	5.2749	0.000238692	0.000302049	0.0201967	0.00920239	0.790243	-0.339631
mdtA	A0A0V9HBZ6	Multidrug resistance protein MdtA OS=Escherichia coli OX=562 GN=mdtA PE=2 SV=1 - [A0A0V9HBZ6_ECOLX]	82.6164	14.81	157	6	6	6	412	44.1832	8.66064	0.000238299	0.000301616	0.00686297	0.00476181	0.790074	-0.33994
BMT91_15555	A0A1V3VXH9	PTS N-acetyl glucosamine transporter subunit IIABC OS=Escherichia coli OX=562 GN=BMT91_15555 PE=4 SV=1 - [A0A1V3VXH9_ECOLX]	348.038	14.35	4	3	9	16	648	68.3479	6.01123	0.000240592	0.000304572	0.0224655	0.00979645	0.789933	-0.340197
EC970246_3073	I2S0B0	Acetyltransferase, GNAT family OS=Escherichia coli 97.0246 OX=869670 GN=EC970246_3073 PE=4 SV=1 - [I2S0B0_ECOLX]	618.035	41.32	15	5	5	23	167	18.5363	4.729	0.000243503	0.000308682	0.00948515	0.00580598	0.788849	-0.342178
G925_03876	A0A0E2KZP1	Coenzyme A biosynthesis bifunctional protein CoaBC OS=Escherichia coli (strain UMEA 3162-1) OX=1281200 GN=G925_03876 PE=3 SV=1 - [A0A0E2KZP1_ECOU3]	392.401	30.54	22	1	10	20	406	43.3966	7.15186	0.000245555	0.000311738	0.00396289	0.00353716	0.787696	-0.344288
ECW26_13690	I0VVD4	Toluene ABC transporter, permease protein OS=Escherichia coli W26 OX=1090926 GN=ECW26_13690 PE=3 SV=1 - [I0VVD4_ECOLX]	111.806	12.77	10	2	2	3	235	25.2256	9.24658	0.000248401	0.000315355	0.00944313	0.00579052	0.787687	-0.344305
pspB	A0A070FGT9	Phage shock protein OS=Escherichia coli O128:H2 str. 2011C-3317 OX=1446581 GN=pspB PE=4 SV=1 - [A0A070FGT9_ECOLX]	150.916	47.3	15	3	3	6	74	8.73857	6.78564	0.000231781	0.000294939	0.00562936	0.00424463	0.785859	-0.347657
AOX65_00235	A0A0T5XQQ9	D-galactose transporter GalP OS=Escherichia coli OX=562 GN=AOX65_00235 PE=3 SV=1 - [A0A0T5XQQ9_ECOLX]	34.4	3.01	35	2	2	2	465	51.1379	9.20264	0.000252058	0.000320913	0.0452242	0.014923	0.78544	-0.348428
ptsO	A0A0K4I4K1	Phosphocarrier protein OS=Escherichia coli OX=562 GN=ptsO PE=4 SV=1 - [A0A0K4I4K1_ECOLX]	35.37	8.89	9	1	1	1	90	9.77391	4.41162	0.000241573	0.000308124	0.0198767	0.00911493	0.784013	-0.351051
degQ	A0A061KHZ9	Periplasmic serine endoprotease DegP-like OS=Escherichia coli OX=562 GN=degQ PE=3 SV=1 - [A0A061KHZ9_ECOLX]	1412.06	55.82	44	18	18	58	455	47.2312	5.94775	0.000237104	0.000303085	0.0064589	0.004598	0.782302	-0.354203
trkD	A0A085P9V2	Low affinity potassium transport system protein kup OS=Escherichia coli OX=562 GN=trkD PE=3 SV=1 - [A0A085P9V2_ECOLX]	59.71	3.7	38	2	2	2	622	69.275	8.99756	0.000245722	0.000315642	0.0197282	0.00907396	0.778483	-0.361263
engA	A0A0K4AT88	GTPase Der OS=Escherichia coli OX=562 GN=engA PE=3 SV=1 - [A0A0K4AT88_ECOLX]	391.256	40.2	13	2	18	39	490	54.9565	5.84619	0.000233124	0.000300282	0.0443127	0.0147488	0.77635	-0.365222
glnL	A0A0E1LGG6	Nitrogen regulation protein NR(II) OS=Escherichia coli OX=562 GN=glnL PE=4 SV=1 - [A0A0E1LGG6_ECOLX]	54.82	5.44	27	2	2	2	349	38.5483	5.65576	0.000234741	0.000303027	0.00533897	0.00411252	0.774653	-0.368377
BX52_12345	A0A0E2TRU3	Protein ElaB OS=Escherichia coli O121:H19 str. 2010C-3609 OX=1446560 GN=BX52_12345 PE=4 SV=1 - [A0A0E2TRU3_ECOLX]	1002.32	59.41	14	6	6	42	101	11.2888	5.56689	0.000232652	0.000300594	0.0248156	0.0103873	0.773974	-0.369644
tolB	A0A0E2TSJ4	Tol-Pal system protein TolB OS=Escherichia coli O121:H19 str. 2010C-3609 OX=1446560 GN=tolB PE=3 SV=1 - [A0A0E2TSJ4_ECOLX]	1713.71	45.58	30	13	13	67	430	45.9432	7.59131	0.000231092	0.000299219	0.0400634	0.0139328	0.772318	-0.372734
slyX	A0A1M0PUJ3	Protein SlyX OS=Escherichia coli OX=562 GN=slyX PE=3 SV=1 - [A0A1M0PUJ3_ECOLX]	69.1879	38.89	9	2	2	4	72	8.23722	4.91943	0.000232763	0.000301486	0.00667583	0.00468699	0.772052	-0.37323
mutM	A0A023Z4G0	Formamidopyrimidine-DNA glycosylase OS=Escherichia coli O145:H28 str. RM12581 OX=1248823 GN=mutM PE=3 SV=1 - [A0A023Z4G0_ECOLX]	55.26	17.47	45	4	4	5	269	30.2268	8.25049	0.000227696	0.000295066	0.0322648	0.0122664	0.771679	-0.373927
gpmA	A0A0K4M2K3	2,3-bisphosphoglycerate-dependent phosphoglycerate mutase OS=Escherichia coli OX=562 GN=gpmA PE=3 SV=1 - [A0A0K4M2K3_ECOLX]	4477.36	56.8	16	16	16	221	250	28.5528	6.17627	0.000232504	0.00030186	0.0200146	0.00915275	0.770239	-0.376622
sixA	H4JAQ0	Phosphohistidine phosphatase SixA OS=Escherichia coli DEC1D OX=868136 GN=sixA PE=4 SV=1 - [H4JAQ0_ECOLX]	45.4333	4.49	22	1	1	3	156	16.5893	4.64014	0.000230311	0.000299228	0.0340419	0.0126729	0.769685	-0.377661
menC	A0A066T4I4	o-succinylbenzoate synthase OS=Escherichia coli OX=562 GN=menC PE=3 SV=1 - [A0A066T4I4_ECOLX]	30.04	11.56	86	3	3	3	320	35.4864	5.12256	0.000233494	0.00030339	0.00213329	0.00258382	0.769618	-0.377786
dnaK_2	A0A1D3KKQ2	Chaperone protein DnaK OS=Escherichia coli OX=562 GN=dnaK_2 PE=2 SV=1 - [A0A1D3KKQ2_ECOLX]	22391.6	64.89	2	1	37	599	638	69.0364	4.97021	0.000243943	0.000317808	0.0410555	0.0141246	0.767582	-0.381607
C7235_12690	A0A2S1Y621	Glutamate decarboxylase OS=Escherichia coli OX=562 GN=C7235_12690 PE=4 SV=1 - [A0A2S1Y621_ECOLX]	26742.7	77.9	127	1	29	987	466	52.6532	5.50342	0.00024257	0.000316417	0.0189353	0.00885094	0.766614	-0.383427
HMPREF1589_01904	U9YF69	Uncharacterized protein OS=Escherichia coli 113290 OX=1268976 GN=HMPREF1589_01904 PE=4 SV=1 - [U9YF69_ECOLX]	48.58	18.71	21	3	3	3	155	17.9028	5.56689	0.000241076	0.000314515	0.00697201	0.0048046	0.766498	-0.383645
glgX	A0A024KS28	Glycogen debranching enzyme OS=Escherichia coli D6-113.11 OX=1400022 GN=glgX PE=3 SV=1 - [A0A024KS28_ECOLX]	140.979	18.57	98	10	10	13	657	73.5445	6.06201	0.000231876	0.000302714	0.000128321	0.000644976	0.765991	-0.3846
rlpA	I0VQG1	Endolytic peptidoglycan transglycosylase RlpA OS=Escherichia coli W26 OX=1090926 GN=rlpA PE=3 SV=1 - [I0VQG1_ECOLX]	469.548	30.66	68	9	9	23	349	36.0491	5.2749	0.000227795	0.000297768	0.030271	0.0117957	0.765007	-0.386455
Q458_07540	V8FLU0	Uncharacterized protein (Fragment) OS=Escherichia coli ATCC BAA-2209 OX=1405293 GN=Q458_07540 PE=4 SV=1 - [V8FLU0_ECOLX]	28.76	12.16	54	1	1	1	74	8.50938	8.01611	0.000225447	0.000295286	0.0150007	0.0076843	0.763487	-0.389325
tuf	A0A1Y2ZA99	Elongation factor Tu (Fragment) OS=Escherichia coli OX=562 GN=tuf PE=4 SV=1 - [A0A1Y2ZA99_ECOLX]	375.215	44.9	1	3	4	40	147	16.015	5.90967	0.000232225	0.000304478	0.00569206	0.00427242	0.7627	-0.390813
yjjV	A0A0G3JWI4	Deoxyribonuclease YjjV OS=Escherichia coli OX=562 GN=yjjV PE=4 SV=1 - [A0A0G3JWI4_ECOLX]	46.9	21.24	110	6	6	8	259	28.8039	6.22705	0.000225243	0.000295892	0.0314888	0.012084	0.761235	-0.393585
deoA	A0A0F6CCW4	Thymidine phosphorylase OS=Escherichia coli Xuzhou21 OX=741093 GN=deoA PE=3 SV=1 - [A0A0F6CCW4_ECOLX]	2186.08	70.78	7	2	24	109	397	42.2825	5.32568	0.000238885	0.000313928	0.00166151	0.00227859	0.760953	-0.394121
BIU72_28155	A0A271TZS2	Glutamate decarboxylase (Fragment) OS=Escherichia coli OX=562 GN=BIU72_28155 PE=3 SV=1 - [A0A271TZS2_ECOLX]	10634.6	64.68	8	1	9	302	235	26.0931	4.85596	0.000236853	0.000311288	0.0355765	0.0130105	0.760879	-0.394261
lnt	A0A2R9VZS7	Apolipoprotein N-acyltransferase (Fragment) OS=Escherichia coli OX=562 GN=lnt PE=4 SV=1 - [A0A2R9VZS7_ECOLX]	68.8665	15.84	107	3	3	5	221	24.8559	5.07178	0.000219865	0.000289363	0.0426367	0.0144239	0.759824	-0.396262
BXT93_25995	A0A1V2FYS1	Phosphoribosylglycinamide formyltransferase (Fragment) OS=Escherichia coli OX=562 GN=BXT93_25995 PE=3 SV=1 - [A0A1V2FYS1_ECOLX]	51.4946	11.5	62	2	2	2	200	21.9122	6.03662	0.000227637	0.000299808	0.0117429	0.00663602	0.759277	-0.397302
CYD32_021145	A0A2P6J3C8	Lipopolysaccharide ABC transporter ATP-binding protein OS=Escherichia coli OX=562 GN=CYD32_021145 PE=4 SV=1 - [A0A2P6J3C8_ECOLX]	539.951	43.15	8	9	9	23	241	26.7831	6.354	0.000225497	0.000297328	0.0155954	0.00785944	0.758413	-0.398944
C6986_36485	A0A2T1MKF4	5-(Carboxyamino)imidazole ribonucleotide synthase (Fragment) OS=Escherichia coli OX=562 GN=C6986_36485 PE=4 SV=1 - [A0A2T1MKF4_ECOLX]	27.9	5.33	96	1	1	1	169	18.8178	6.01123	0.000231279	0.000304954	0.0363102	0.0131678	0.758408	-0.398954
corA	A0A2H9E3Q9	Magnesium transport protein CorA (Fragment) OS=Escherichia coli OX=562 GN=corA PE=3 SV=1 - [A0A2H9E3Q9_ECOLX]	129.39	21.05	29	4	4	5	304	34.9867	4.61475	0.000234572	0.000309316	0.0112668	0.00647154	0.758356	-0.399052
gnd	A0A0A8J4Z1	6-phosphogluconate dehydrogenase, decarboxylating OS=Escherichia coli OX=562 GN=gnd PE=3 SV=1 - [A0A0A8J4Z1_ECOLX]	3279.06	45.09	17	1	17	110	468	51.7016	5.42725	0.000224602	0.00029617	0.0377636	0.0134717	0.758355	-0.399054
Q609_ECAC02877G0001	W1VZT5	Uncharacterized protein (Fragment) OS=Escherichia coli DORA_A_5_14_21 OX=1403943 GN=Q609_ECAC02877G0001 PE=4 SV=1 - [W1VZT5_ECOLX]	1405.88	56.25	23	12	12	60	192	21.249	8.25049	0.000227605	0.000300141	0.0179823	0.0085731	0.758328	-0.399107
C5P43_17740	A0A2S7HKE2	Uncharacterized protein (Fragment) OS=Escherichia coli OX=562 GN=C5P43_17740 PE=4 SV=1 - [A0A2S7HKE2_ECOLX]	38.0912	26.79	44	3	3	6	112	12.0952	7.34229	0.000227295	0.000299848	0.0153582	0.00779027	0.758034	-0.399666
msrB	A0A0D8WB56	Peptide methionine sulfoxide reductase MsrB OS=Escherichia coli OX=562 GN=msrB PE=3 SV=1 - [A0A0D8WB56_ECOLX]	369.538	59.12	23	6	6	16	137	15.4272	5.93506	0.000227571	0.00030038	0.0275493	0.0111182	0.757609	-0.400475
C6986_29235	A0A2T1MP20	Uncharacterized protein (Fragment) OS=Escherichia coli OX=562 GN=C6986_29235 PE=4 SV=1 - [A0A2T1MP20_ECOLX]	45.37	5.77	127	1	1	1	208	23.0401	5.38916	0.000211229	0.000278861	0.0410726	0.0141279	0.757473	-0.400734
BH694_08450	A0A061KV38	DNA-binding transcriptional regulator KdgR OS=Escherichia coli OX=562 GN=BH694_08450 PE=4 SV=1 - [A0A061KV38_ECOLX]	756.466	55.13	8	1	13	35	263	30.0255	5.42725	0.00022238	0.000293951	0.00509224	0.00399571	0.756521	-0.402547
gsiB	A0A2H4TNI9	Glutathione ABC transporter substrate-binding protein GsiB OS=Escherichia coli OX=562 GN=gsiB PE=4 SV=1 - [A0A2H4TNI9_ECOLX]	135.122	31.9	5	1	8	12	348	38.7906	7.51807	0.000232503	0.000307386	0.00241925	0.00277391	0.756388	-0.402801
ECO111_1553	C8UNY0	Histidine kinase OS=Escherichia coli O111:H- (strain 11128 / EHEC) OX=585396 GN=ECO111_1553 PE=4 SV=1 - [C8UNY0_ECO1A]	425.877	13.79	78	4	12	30	812	90.6452	6.58057	0.000228426	0.000302021	0.00293808	0.00307412	0.756326	-0.40292
Q609_ECAC01124G0001	W1X5W9	Hydrogenase isoenzyme formation protein hypD (Fragment) OS=Escherichia coli DORA_A_5_14_21 OX=1403943 GN=Q609_ECAC01124G0001 PE=4 SV=1 - [W1X5W9_ECOLX]	59.5713	17.79	40	3	3	5	163	18.1853	7.07861	0.000234242	0.000310377	0.0157648	0.00790831	0.754702	-0.406022
NRG857_07035	A0A0H3EH67	Uncharacterized protein OS=Escherichia coli O83:H1 (strain NRG 857C / AIEC) OX=685038 GN=NRG857_07035 PE=4 SV=1 - [A0A0H3EH67_ECO8N]	51.9533	7.83	101	4	4	4	447	50.8825	5.45264	0.000227136	0.000301247	0.0147237	0.00760076	0.753987	-0.407388
C1I57_38375	A0A2R9VWL2	DNA polymerase III subunit epsilon (Fragment) OS=Escherichia coli OX=562 GN=C1I57_38375 PE=4 SV=1 - [A0A2R9VWL2_ECOLX]	33.24	14.41	48	2	2	2	111	12.3103	7.29834	0.000231212	0.000306929	0.000572974	0.00139124	0.753309	-0.408685
BX06_09300	A0A028AKB5	Uncharacterized protein OS=Escherichia coli O69:H11 str. 08-4661 OX=1446753 GN=BX06_09300 PE=4 SV=1 - [A0A028AKB5_ECOLX]	96.8996	13.41	52	7	7	10	552	63.4482	9.14404	0.000223789	0.000297272	0.00197291	0.00248452	0.752808	-0.409646
G925_00687	A0A0E2L8E6	KDP operon transcriptional regulatory protein kdpE OS=Escherichia coli (strain UMEA 3162-1) OX=1281200 GN=G925_00687 PE=4 SV=1 - [A0A0E2L8E6_ECOU3]	59.82	30.67	51	6	6	7	225	25.3605	6.44287	0.000239532	0.000318212	0.00122184	0.00192337	0.752744	-0.409768
PU06_00030	A0A0B1NHA2	Glutamine amidotransferase OS=Escherichia coli OX=562 GN=PU06_00030 PE=4 SV=1 - [A0A0B1NHA2_ECOLX]	124.623	32.16	32	7	7	9	255	28.6032	7.95752	0.000232038	0.000308352	0.0261368	0.0107472	0.75251	-0.410217
C6986_35645	A0A2T1MKW9	FKBP-type peptidyl-prolyl cis-trans isomerase (Fragment) OS=Escherichia coli OX=562 GN=C6986_35645 PE=4 SV=1 - [A0A2T1MKW9_ECOLX]	135.735	24.37	24	2	2	4	119	12.7993	4.55127	0.000225125	0.000299179	0.000573755	0.00139204	0.752476	-0.410282
HMPREF9540_03044	D7Y627	Intracellular growth attenuator protein IgaA (Fragment) OS=Escherichia coli MS 115-1 OX=749537 GN=HMPREF9540_03044 PE=4 SV=1 - [D7Y627_ECOLX]	135.22	16.49	102	8	8	10	558	62.1603	6.13818	0.000224996	0.000299465	0.00991651	0.00597419	0.751329	-0.412483
lptC	I0VVC9	Lipopolysaccharide export system protein LptC OS=Escherichia coli W26 OX=1090926 GN=lptC PE=3 SV=1 - [I0VVC9_ECOLX]	47.3168	18.23	20	3	3	3	181	20.4804	5.59229	0.000220543	0.000293644	0.0394624	0.0138145	0.751054	-0.413011
C6985_14995	A0A2T1LHP8	Anti-sigma-E factor RseA OS=Escherichia coli OX=562 GN=C6985_14995 PE=4 SV=1 - [A0A2T1LHP8_ECOLX]	38.5642	13.89	3	1	2	3	216	24.198	5.78271	0.000228752	0.000304754	0.00249886	0.00282328	0.750612	-0.413861
ilvE	A0A066RE28	Branched-chain-amino-acid aminotransferase OS=Escherichia coli OX=562 GN=ilvE PE=3 SV=1 - [A0A066RE28_ECOLX]	377.389	25.57	24	6	6	14	309	34.0581	5.8208	0.000224196	0.000299042	0.0134521	0.00719998	0.749712	-0.415592
zapD	A0A025CLD6	Cell division protein ZapD OS=Escherichia coli O145:NM str. 2010C-3526 OX=1446596 GN=zapD PE=3 SV=1 - [A0A025CLD6_ECOLX]	423.364	39.68	31	8	8	29	247	28.2778	6.78564	0.000225997	0.000301517	0.0220624	0.00969349	0.749531	-0.41594
AD40_2285	A0A080G0S8	Inner membrane amino-acid ABC transporter permease protein yecS OS=Escherichia coli 1-392-07_S4_C3 OX=1444275 GN=AD40_2285 PE=3 SV=1 - [A0A080G0S8_ECOLX]	46.72	32.67	30	4	4	9	150	16.6477	7.25439	0.000226492	0.000302272	0.00548898	0.00418147	0.749299	-0.416387
adhE	B7MKZ2	Aldehyde-alcohol dehydrogenase OS=Escherichia coli O45:K1 (strain S88 / ExPEC) OX=585035 GN=adhE PE=3 SV=1 - [B7MKZ2_ECO45]	10159.1	69.58	9	3	47	408	891	96.0967	6.78564	0.000222	0.00029643	0.0472659	0.0153071	0.748911	-0.417134
BET08_13220	A0A1V2SVA9	DNA-binding response regulator (Fragment) OS=Escherichia coli OX=562 GN=BET08_13220 PE=4 SV=1 - [A0A1V2SVA9_ECOLX]	143.386	47.12	29	9	9	17	208	22.8284	8.26514	0.000231194	0.000308709	0.048787	0.0155841	0.748908	-0.417139
gpmI	A0A0A0GCI5	2,3-bisphosphoglycerate-independent phosphoglycerate mutase OS=Escherichia coli OX=562 GN=gpmI PE=3 SV=1 - [A0A0A0GCI5_ECOLX]	2161.84	50.78	16	1	18	91	514	56.1313	5.33838	0.000249916	0.000333849	0.0197694	0.00908535	0.74859	-0.417752
ompR	A0A070UX09	Transcriptional regulatory protein ompR OS=Escherichia coli 2-177-06_S3_C2 OX=1444151 GN=ompR PE=4 SV=1 - [A0A070UX09_ECOLX]	994.889	50.21	19	10	10	58	239	27.3262	6.39209	0.000226089	0.000302108	0.0318698	0.0121737	0.748369	-0.418178
cydC	A0A029IYW2	Thiol reductant ABC exporter, CydC subunit OS=Escherichia coli 2-005-03_S4_C2 OX=1444228 GN=cydC PE=4 SV=1 - [A0A029IYW2_ECOLX]	223.886	15.71	96	7	7	10	573	62.8137	8.26514	0.000226756	0.000303084	0.0433425	0.014562	0.748161	-0.418579
rapA	A0A027U2B9	RNA polymerase-associated protein RapA OS=Escherichia coli O111:NM str. K6722 OX=1446533 GN=rapA PE=3 SV=1 - [A0A027U2B9_ECOLX]	998.198	35.12	82	28	28	60	968	109.729	5.17334	0.0002236	0.000299449	0.0101845	0.00607672	0.746706	-0.421388
ybeM	A0A023YTR6	Carbon-nitrogen hydrolase OS=Escherichia coli O145:H28 str. RM12581 OX=1248823 GN=ybeM PE=4 SV=1 - [A0A023YTR6_ECOLX]	274.814	36.26	50	6	6	13	262	28.6339	6.29053	0.000228912	0.000306605	0.00100981	0.00175937	0.746604	-0.421584
C1I57_32395	A0A2R9VZY8	Uncharacterized protein (Fragment) OS=Escherichia coli OX=562 GN=C1I57_32395 PE=4 SV=1 - [A0A2R9VZY8_ECOLX]	59.95	16.92	46	2	2	3	130	14.9876	6.55127	0.000220413	0.000295398	0.0117685	0.00664473	0.746156	-0.422451
PU06_19690	A0A0B1MRW9	Clp protease ClpP OS=Escherichia coli OX=562 GN=PU06_19690 PE=4 SV=1 - [A0A0B1MRW9_ECOLX]	184.618	20	25	3	3	8	165	18.209	4.55127	0.000229893	0.000308221	0.0025433	0.00285021	0.745871	-0.423001
pcm	B7MKL7	Protein-L-isoaspartate O-methyltransferase OS=Escherichia coli O45:K1 (strain S88 / ExPEC) OX=585035 GN=pcm PE=3 SV=1 - [PIMT_ECO45]	67.1721	27.88	17	5	5	6	208	23.2284	7.04932	0.000230964	0.000309801	0.00220173	0.00263124	0.745526	-0.423669
C6985_20730	A0A2T1LEF1	Pirin family protein OS=Escherichia coli OX=562 GN=C6985_20730 PE=4 SV=1 - [A0A2T1LEF1_ECOLX]	197.34	28.57	3	3	6	13	231	26.2309	5.42725	0.000231055	0.000309928	0.00141925	0.00209114	0.745513	-0.423695
rsuA	A0A029HTG3	Pseudouridine synthase OS=Escherichia coli 2-005-03_S4_C3 OX=1444258 GN=rsuA PE=3 SV=1 - [A0A029HTG3_ECOLX]	273.973	51.52	22	8	8	17	231	25.8793	6.17627	0.000229188	0.000307573	0.00375172	0.00345322	0.74515	-0.424396
sufI	A0A029HIY9	Cell division protein FtsP OS=Escherichia coli 2-005-03_S4_C3 OX=1444258 GN=sufI PE=3 SV=1 - [A0A029HIY9_ECOLX]	52.269	11.06	38	4	4	4	470	51.8265	6.34131	0.00022602	0.000303512	0.000870863	0.00165191	0.744684	-0.4253
sufA	A0A2T7Y366	FeS assembly scaffold SufA OS=Escherichia coli OX=562 GN=sufA PE=4 SV=1 - [A0A2T7Y366_ECOLX]	97.2793	17.5	21	2	2	4	120	13.0594	5.17334	0.000224653	0.000301837	0.00142068	0.00209233	0.744285	-0.426074
cmk	A0A085P3Y8	Cytidylate kinase OS=Escherichia coli OX=562 GN=cmk PE=3 SV=1 - [A0A085P3Y8_ECOLX]	1191.19	53.3	17	7	9	34	227	24.7611	5.84619	0.000225972	0.000303653	0.0175492	0.00844312	0.744178	-0.42628
purU	A0A0K4CKG6	Formyltetrahydrofolate deformylase OS=Escherichia coli OX=562 GN=purU PE=3 SV=1 - [A0A0K4CKG6_ECOLX]	314.249	21.79	14	5	5	16	280	31.9155	7.18115	0.000225381	0.000302872	0.0234631	0.0100448	0.744145	-0.426344
BIQ87_18070	A0A0J2BAX9	Arabinose 5-phosphate isomerase OS=Escherichia coli OX=562 GN=BIQ87_18070 PE=3 SV=1 - [A0A0J2BAX9_ECOLX]	334.187	31.71	31	9	9	25	328	35.1721	6.97607	0.000222852	0.000300034	0.00333385	0.00327067	0.742756	-0.429039
pgl	A0A028AGR0	6-phosphogluconolactonase OS=Escherichia coli O69:H11 str. 08-4661 OX=1446753 GN=pgl PE=3 SV=1 - [A0A028AGR0_ECOLX]	1639.16	60.42	43	13	13	76	331	36.2158	5.18604	0.000223154	0.000300686	0.0173166	0.00837235	0.742152	-0.430214
hypF	A0A2R9W2J3	Acylphosphatase (Fragment) OS=Escherichia coli OX=562 GN=hypF PE=4 SV=1 - [A0A2R9W2J3_ECOLX]	51.0384	4.5	163	2	2	2	511	56.0521	6.12549	0.000238511	0.000321382	0.0101418	0.00606052	0.742144	-0.430229
C6986_04570	A0A2T1N231	2-oxoglutarate dehydrogenase E1 component (Fragment) OS=Escherichia coli OX=562 GN=C6986_04570 PE=4 SV=1 - [A0A2T1N231_ECOLX]	924.233	35.77	2	3	14	58	397	44.8604	6.52197	0.000224274	0.000302212	0.0035049	0.00334823	0.742109	-0.430296
ihfB	B7MHM1	Integration host factor subunit beta OS=Escherichia coli O45:K1 (strain S88 / ExPEC) OX=585035 GN=ihfB PE=3 SV=1 - [IHFB_ECO45]	537.381	65.96	9	6	6	53	94	10.6445	9.34912	0.000224722	0.000302829	0.0343708	0.0127463	0.742076	-0.430361
HMPREF9540_04982	D7YBG9	Uncharacterized protein OS=Escherichia coli MS 115-1 OX=749537 GN=HMPREF9540_04982 PE=4 SV=1 - [D7YBG9_ECOLX]	336.545	42.11	48	4	4	14	171	18.7031	5.07178	0.000223342	0.0003014	0.0497853	0.0157619	0.741015	-0.432425
nanR	A0A2S7HI53	Transcriptional regulator NanR (Fragment) OS=Escherichia coli OX=562 GN=nanR PE=4 SV=1 - [A0A2S7HI53_ECOLX]	88.5767	23.85	39	5	5	7	218	24.3315	6.59521	0.000223119	0.000301293	7.56915e-05	0.000477743	0.740538	-0.433354
BET08_30385	A0A1V2SSH5	GNAT family N-acetyltransferase (Fragment) OS=Escherichia coli OX=562 GN=BET08_30385 PE=4 SV=1 - [A0A1V2SSH5_ECOLX]	273.331	21.74	35	4	5	10	276	31.319	7.72314	0.000225841	0.000305271	0.0464213	0.01515	0.739806	-0.434782
JD73_12695	A0A085P5X8	C-lysozyme inhibitor OS=Escherichia coli OX=562 GN=JD73_12695 PE=4 SV=1 - [A0A085P5X8_ECOLX]	1997.45	46.62	23	5	5	69	148	15.9989	6.29053	0.000222954	0.000301518	0.0424511	0.0143876	0.739439	-0.435497
yjgP	A0A2D0NZ94	Uncharacterized protein OS=Escherichia coli O127:H6 OX=168807 GN=yjgP PE=4 SV=1 - [A0A2D0NZ94_ECOLX]	149.53	23.05	46	5	5	12	308	33.9459	9.01221	0.000220866	0.000298736	0.00796747	0.0052105	0.739335	-0.435699
ECDEC2E_4050	H4LI73	Phosphoenolpyruvate carboxykinase domain protein OS=Escherichia coli DEC2E OX=868142 GN=ECDEC2E_4050 PE=4 SV=1 - [H4LI73_ECOLX]	390.007	79.69	1	1	5	23	64	7.0036	4.71631	0.000222757	0.000301533	0.0294975	0.011608	0.738748	-0.436847
hisH	A0A1L6W003	Imidazole glycerol phosphate synthase subunit HisH OS=Escherichia coli OX=562 GN=hisH PE=3 SV=1 - [A0A1L6W003_ECOLX]	177.582	22.96	5	4	4	14	196	21.6379	5.84619	0.000219876	0.000298052	0.0106409	0.00624688	0.737711	-0.438873
BET08_09110	A0A1V2T1G1	Nitrate/nitrite transporter (Fragment) OS=Escherichia coli OX=562 GN=BET08_09110 PE=4 SV=1 - [A0A1V2T1G1_ECOLX]	25.49	11.21	41	3	3	3	321	34.694	9.53955	0.000227216	0.000308017	0.0158971	0.00794741	0.737675	-0.438944
alr	Q8FB20	Alanine racemase, biosynthetic OS=Escherichia coli O6:H1 (strain CFT073 / ATCC 700928 / UPEC) OX=199310 GN=alr PE=3 SV=1 - [ALR1_ECOL6]	67.91	13.93	55	4	4	4	359	39.0231	6.13818	0.000237027	0.000321575	0.0256063	0.0106042	0.737081	-0.440105
pepD	A0A1D3KH96	Aminoacyl-histidine dipeptidase OS=Escherichia coli OX=562 GN=pepD PE=4 SV=1 - [A0A1D3KH96_ECOLX]	710.853	23.71	2	1	9	35	485	52.4008	5.43994	0.000213054	0.000289241	0.0333357	0.0125134	0.736595	-0.441056
Q609_ECAC01989G0001	W1WNL7	Cytoplasmic trehalase (Fragment) OS=Escherichia coli DORA_A_5_14_21 OX=1403943 GN=Q609_ECAC01989G0001 PE=3 SV=1 - [W1WNL7_ECOLX]	112.929	20.79	55	9	9	11	529	61.3514	5.12256	0.000227914	0.000309714	0.000272165	0.000969559	0.735886	-0.442445
Q609_ECAC00180G0004	W1XGU1	3-octaprenyl-4-hydroxybenzoate carboxy-lyase (Fragment) OS=Escherichia coli DORA_A_5_14_21 OX=1403943 GN=Q609_ECAC00180G0004 PE=3 SV=1 - [W1XGU1_ECOLX]	22.84	5.85	25	1	1	1	171	18.5789	7.56201	0.000235776	0.000320619	0.0152521	0.00775905	0.735378	-0.443442
ECHG_01732	F4SL11	Lipid A biosynthesis (KDO)2-(Lauroyl)-lipid IVA acyltransferase OS=Escherichia coli H736 OX=656414 GN=ECHG_01732 PE=4 SV=1 - [F4SL11_ECOLX]	0	17.96	46	2	2	3	167	19.6762	9.5542	0.000223068	0.000303472	0.0270389	0.0109858	0.735053	-0.444079
gapA	E0WA03	GapA (Fragment) OS=Escherichia coli OX=562 GN=gapA PE=3 SV=1 - [E0WA03_ECOLX]	6186.91	86.18	3	1	13	174	152	15.8951	7.98682	0.000218958	0.00029791	0.00795168	0.00520387	0.73498	-0.444223
yjjX	A0A0G9FKI5	Non-canonical purine NTP phosphatase OS=Escherichia coli OX=562 GN=yjjX PE=3 SV=1 - [A0A0G9FKI5_ECOLX]	36.46	17.71	71	3	3	3	175	18.7967	6.07471	0.000227008	0.000309023	0.00687892	0.0047681	0.7346	-0.444968
ECW26_12450	I0VVT8	Putative DNA-binding transcriptional regulator OS=Escherichia coli W26 OX=1090926 GN=ECW26_12450 PE=4 SV=1 - [I0VVT8_ECOLX]	116.556	25.88	22	6	6	8	228	25.473	5.87158	0.000219932	0.000299465	0.00193733	0.00246271	0.734419	-0.445326
sbcC	A0A024KTJ2	Nuclease SbcCD subunit C OS=Escherichia coli D6-113.11 OX=1400022 GN=sbcC PE=3 SV=1 - [A0A024KTJ2_ECOLX]	87.29	7.64	139	8	8	9	1047	118.652	5.88428	0.000221401	0.00030152	1.08589e-05	0.000160561	0.734285	-0.445588
guaD	A0A1Q6B6F6	Guanine deaminase OS=Escherichia coli OX=562 GN=guaD PE=4 SV=1 - [A0A1Q6B6F6_ECOLX]	19.22	1.82	1	1	1	1	439	50.1851	6.18896	0.000241232	0.000328621	0.0447643	0.0148345	0.734074	-0.446002
fur	A0A2J1C8R0	Ferric uptake regulation protein OS=Escherichia coli OX=562 GN=fur PE=3 SV=1 - [A0A2J1C8R0_ECOLX]	930.915	68.92	14	8	8	55	148	16.7653	6.07471	0.000223506	0.000304479	0.014721	0.00759995	0.734058	-0.446034
ftsJ	A0A0K4I2L0	Ribosomal RNA large subunit methyltransferase E OS=Escherichia coli OX=562 GN=ftsJ PE=3 SV=1 - [A0A0K4I2L0_ECOLX]	229.116	33.97	12	6	6	17	209	23.3061	9.29053	0.000218883	0.0002985	0.0367213	0.0132547	0.733276	-0.447571
ccmG	Q14F39	CcmG (Fragment) OS=Escherichia coli OX=562 GN=ccmG PE=4 SV=1 - [Q14F39_ECOLX]	41.41	14.47	25	2	2	2	159	17.687	5.14795	0.000208137	0.000284034	0.0238305	0.0101359	0.732789	-0.44853
ccmE	A0A0E1LDX8	Cytochrome c-type biogenesis protein CcmE OS=Escherichia coli OX=562 GN=ccmE PE=3 SV=1 - [A0A0E1LDX8_ECOLX]	170.68	23.84	19	3	3	6	151	16.6365	5.31299	0.000222374	0.000303496	0.0111088	0.00641575	0.732708	-0.44869
tdk	A0A070FR50	Thymidine kinase OS=Escherichia coli O128:H2 str. 2011C-3317 OX=1446581 GN=tdk PE=3 SV=1 - [A0A070FR50_ECOLX]	82.0603	30.24	22	1	4	6	205	23.3687	6.66846	0.000207476	0.000283227	0.0224711	0.00979787	0.732542	-0.449016
AC45_0301	A0A070SV39	Ribosomal subunit interface protein OS=Escherichia coli 2-210-07_S3_C3 OX=1444180 GN=AC45_0301 PE=4 SV=1 - [A0A070SV39_ECOLX]	2104.24	27.37	6	2	2	79	95	10.7716	7.06396	0.000223365	0.000304968	0.00917607	0.00569097	0.732422	-0.449253
rlmD	A0A024L9H1	23S rRNA (uracil(1939)-C(5))-methyltransferase RlmD OS=Escherichia coli OX=562 GN=rlmD PE=3 SV=1 - [A0A024L9H1_ECOLX]	52.32	6.7	76	3	3	3	433	48.119	8.63135	0.000224539	0.000306614	0.0284706	0.0113529	0.732316	-0.449462
HMPREF1608_05256	V0X480	Uncharacterized protein (Fragment) OS=Escherichia coli 908525 OX=1268995 GN=HMPREF1608_05256 PE=4 SV=1 - [V0X480_ECOLX]	772.255	74.55	2	1	5	41	55	6.3712	4.83057	0.000209861	0.000286581	0.00403654	0.00356525	0.732291	-0.449511
rpmA	B7MBV4	50S ribosomal protein L27 OS=Escherichia coli O45:K1 (strain S88 / ExPEC) OX=585035 GN=rpmA PE=3 SV=1 - [RL27_ECO45]	1649.14	45.88	6	4	4	76	85	9.11888	10.5796	0.000223483	0.000305224	0.035503	0.0129946	0.732194	-0.449703
uvrA	A0A061L2L2	UvrABC system protein A OS=Escherichia coli OX=562 GN=uvrA PE=3 SV=1 - [A0A061L2L2_ECOLX]	1267.41	37.02	54	28	28	69	940	103.805	6.63916	0.000221709	0.000302802	0.00366631	0.00341777	0.732191	-0.449708
BK248_26405	A0A1M0CLF8	Molybdopterin-synthase adenylyltransferase MoeB OS=Escherichia coli OX=562 GN=BK248_26405 PE=4 SV=1 - [A0A1M0CLF8_ECOLX]	96.0977	22.18	76	5	5	6	248	26.5724	5.2749	0.000219969	0.000300874	0.00207752	0.00254636	0.731101	-0.451857
AMK83_02845	A0A0F3T3U7	Putative allophanate hydrolase subunit 2 OS=Escherichia coli OX=562 GN=AMK83_02845 PE=4 SV=1 - [A0A0F3T3U7_ECOLX]	388.304	39.35	50	10	10	27	310	34.4366	8.35303	0.000217342	0.000297591	0.0196909	0.00906361	0.73034	-0.453361
AZZ83_001074	A0A243V7D4	Psp operon transcriptional activator OS=Escherichia coli OX=562 GN=AZZ83_001074 PE=4 SV=1 - [A0A243V7D4_ECOLX]	92.4013	15.09	64	3	3	4	212	24.5838	6.13818	0.000227389	0.000311511	0.0142353	0.00745023	0.729956	-0.454119
C5P43_17035	A0A2S7HSH8	Isoleucine--tRNA ligase (Fragment) OS=Escherichia coli OX=562 GN=C5P43_17035 PE=4 SV=1 - [A0A2S7HSH8_ECOLX]	1835.79	48.08	5	1	23	96	574	63.8143	6.07471	0.000206366	0.000282798	0.0123567	0.00684042	0.729732	-0.454561
BX06_13445	A0A028AFL0	Galactose-1-phosphate uridylyltransferase OS=Escherichia coli O69:H11 str. 08-4661 OX=1446753 GN=BX06_13445 PE=3 SV=1 - [A0A028AFL0_ECOLX]	166.669	21.55	57	4	8	12	348	39.6966	6.52197	0.000224511	0.000307675	0.00161344	0.00224349	0.729703	-0.454619
nudC	E6BRU6	NAD(+) diphosphatase (Fragment) OS=Escherichia coli MS 85-1 OX=679202 GN=nudC PE=4 SV=1 - [E6BRU6_ECOLX]	118.516	29.44	35	5	5	11	214	24.6573	6.44287	0.000221582	0.000303915	0.0313482	0.0120511	0.729093	-0.455824
ppk1	A0A070SQJ7	Polyphosphate kinase OS=Escherichia coli 2-210-07_S3_C3 OX=1444180 GN=ppk1 PE=3 SV=1 - [A0A070SQJ7_ECOLX]	1220.52	46.66	47	17	28	75	688	80.3392	8.92432	0.000218856	0.000300186	0.00175638	0.00234511	0.729067	-0.455876
AC84_4074	A0A074HRC2	Glutamate decarboxylase alpha domain protein (Fragment) OS=Escherichia coli 1-392-07_S4_C1 OX=1444219 GN=AC84_4074 PE=4 SV=1 - [A0A074HRC2_ECOLX]	11990.8	88.98	33	1	10	376	127	14.3462	5.5415	0.000218456	0.000299682	0.0393183	0.0137859	0.728959	-0.456091
speE	A0A037YRT4	Polyamine aminopropyltransferase OS=Escherichia coli OX=562 GN=speE PE=3 SV=1 - [A0A037YRT4_ECOLX]	93.5214	23.61	42	5	5	12	288	32.2907	5.65576	0.00021976	0.000301612	0.00107229	0.00180218	0.728618	-0.456766
ECCG_03391	D6HSW9	ATP-dependent Clp protease proteolytic subunit OS=Escherichia coli B088 OX=550672 GN=ECCG_03391 PE=3 SV=1 - [D6HSW9_ECOLX]	774.635	39.22	12	2	2	20	102	11.2868	7.51807	0.000219786	0.000301788	0.00334441	0.00327558	0.728281	-0.457434
rodZ	A0A061YMH5	Cytoskeleton protein RodZ OS=Escherichia coli OX=562 GN=rodZ PE=3 SV=1 - [A0A061YMH5_ECOLX]	580.777	34.33	56	11	11	32	335	36.1203	5.74463	0.000218419	0.000299943	0.00704903	0.00483447	0.728203	-0.457588
C1I57_30135	A0A2R9W1S1	Exodeoxyribonuclease V subunit alpha (Fragment) OS=Escherichia coli OX=562 GN=C1I57_30135 PE=3 SV=1 - [A0A2R9W1S1_ECOLX]	63.4136	13.08	106	5	5	5	413	45.4617	9.02686	0.00021905	0.000300935	0.00381421	0.0034786	0.7279	-0.458188
Q609_ECAC02446G0002	W1WBI7	Uncharacterized protein (Fragment) OS=Escherichia coli DORA_A_5_14_21 OX=1403943 GN=Q609_ECAC02446G0002 PE=4 SV=1 - [W1WBI7_ECOLX]	35.32	17.54	14	1	1	2	57	6.52551	5.0083	0.000204118	0.000280461	0.0336353	0.0125814	0.727797	-0.458391
zapA	A0A193LWN4	Cell division protein ZapA OS=Escherichia coli OX=562 GN=zapA PE=3 SV=1 - [A0A193LWN4_ECOLX]	224.454	44.95	10	4	4	16	109	12.5564	5.24951	0.000220535	0.00030315	0.0164928	0.00812777	0.727478	-0.459024
BK400_17325	A0A1M2TZ54	GNAT family N-acetyltransferase OS=Escherichia coli OX=562 GN=BK400_17325 PE=4 SV=1 - [A0A1M2TZ54_ECOLX]	0	5.65	1	1	1	1	124	14.3734	9.49561	0.000218727	0.00030068	0.00872543	0.00551774	0.72744	-0.4591
C4Z16_17445	A0A061YMC3	Uncharacterized protein OS=Escherichia coli OX=562 GN=C4Z16_17445 PE=4 SV=1 - [A0A061YMC3_ECOLX]	288.7	20.81	88	1	7	14	418	42.7937	4.53857	0.000219213	0.000301455	0.0258236	0.010663	0.727181	-0.459613
moaB	A0A2A3W3Y3	Molybdenum cofactor biosynthesis protein B OS=Escherichia coli OX=562 GN=moaB PE=3 SV=1 - [A0A2A3W3Y3_ECOLX]	783.011	54.71	19	8	8	40	170	18.6675	6.1001	0.000223626	0.000307574	0.00905049	0.00564337	0.727065	-0.459844
UC41_10760	A0A0D8WCL0	Capsule biosynthesis protein OS=Escherichia coli OX=562 GN=UC41_10760 PE=4 SV=1 - [A0A0D8WCL0_ECOLX]	303.013	37.43	28	14	14	21	382	43.0866	6.7124	0.000228479	0.000314447	0.0457099	0.0150157	0.726607	-0.460754
ECDEC6A_4277	H4UQN2	Outer membrane protein slp OS=Escherichia coli DEC6A OX=868160 GN=ECDEC6A_4277 PE=4 SV=1 - [H4UQN2_ECOLX]	2822.78	59.57	7	1	7	167	188	20.9667	7.41553	0.000223389	0.000307596	0.0488244	0.0155908	0.726241	-0.461481
AOX65_16455	A0A0T5XPP8	Dimethyl sulfoxide reductase OS=Escherichia coli OX=562 GN=AOX65_16455 PE=3 SV=1 - [A0A0T5XPP8_ECOLX]	366.7	13.51	137	1	10	19	814	90.1007	6.771	0.000215427	0.000297122	0.0263854	0.0108135	0.725046	-0.463855
BU64_18460	A0A070FFL6	Uncharacterized protein OS=Escherichia coli O128:H2 str. 2011C-3317 OX=1446581 GN=BU64_18460 PE=4 SV=1 - [A0A070FFL6_ECOLX]	118.119	55.56	9	2	2	5	72	7.89885	4.83057	0.000218133	0.000300907	0.0209724	0.00940987	0.72492	-0.464106
C6986_36610	A0A2T1MKH6	Uncharacterized protein (Fragment) OS=Escherichia coli OX=562 GN=C6986_36610 PE=4 SV=1 - [A0A2T1MKH6_ECOLX]	39.11	13.02	39	2	2	2	169	19.3691	6.82959	0.000218657	0.000302287	0.00268632	0.00293489	0.723343	-0.467247
DD768_16950	A0A2U2TG55	L-cystine ABC transporter ATP-binding protein YecC OS=Escherichia coli OX=562 GN=DD768_16950 PE=4 SV=1 - [A0A2U2TG55_ECOLX]	199.928	27.47	12	2	5	11	233	25.9279	9.34912	0.000222958	0.000308639	0.00799247	0.00522097	0.722389	-0.469151
ECW26_39830	I0VMV8	Putative lipoprotein OS=Escherichia coli W26 OX=1090926 GN=ECW26_39830 PE=4 SV=1 - [I0VMV8_ECOLX]	73.0222	51.02	19	3	3	5	49	5.54592	4.77979	0.00021557	0.00029846	0.0113591	0.00650385	0.722274	-0.469381
Q609_ECAC02618G0002	W1W854	UDP-glucose:(Glucosyl) LPS alpha1,3-glucosyltransferase WaaO (Fragment) OS=Escherichia coli DORA_A_5_14_21 OX=1403943 GN=Q609_ECAC02618G0002 PE=4 SV=1 - [W1W854_ECOLX]	75.04	9.91	49	2	2	6	212	23.837	6.0874	0.000214752	0.000297387	0.0336031	0.0125741	0.722129	-0.469671
AOX65_10945	A0A0T5XFK4	Glycoprotein-polysaccharide metabolism protein OS=Escherichia coli OX=562 GN=AOX65_10945 PE=4 SV=1 - [A0A0T5XFK4_ECOLX]	1341.27	20.57	1	1	2	37	175	18.3378	8.1333	0.000217816	0.000301729	0.0265749	0.0108638	0.721893	-0.470144
icd	Q7WV52	Isocitrate dehydrogenase [NADP] (Fragment) OS=Escherichia coli OX=562 GN=icd PE=4 SV=1 - [Q7WV52_ECOLX]	4284.33	65.3	56	1	24	228	389	42.843	5.22412	0.000215766	0.000299186	0.0394116	0.0138045	0.721178	-0.471573
tilS	A0A0H3EFZ3	tRNA(Ile)-lysidine synthase OS=Escherichia coli O83:H1 (strain NRG 857C / AIEC) OX=685038 GN=tilS PE=3 SV=1 - [A0A0H3EFZ3_ECO8N]	91.3995	14.12	113	5	5	7	432	47.9191	7.26904	0.000215574	0.000299097	0.00376911	0.00346033	0.720749	-0.47243
AB67_0121	A0A073I7H8	Uncharacterized protein OS=Escherichia coli 5-366-08_S1_C3 OX=1444102 GN=AB67_0121 PE=4 SV=1 - [A0A073I7H8_ECOLX]	180.765	27.27	23	9	9	16	308	34.6394	8.44092	0.000218489	0.00030332	0.0496273	0.0157339	0.720327	-0.473276
ECW26_03510	I0VY76	Surface antigen family protein OS=Escherichia coli W26 OX=1090926 GN=ECW26_03510 PE=4 SV=1 - [I0VY76_ECOLX]	60.19	17.84	67	8	8	11	527	59.3563	8.89502	0.000215181	0.000298835	0.00712694	0.0048644	0.720065	-0.4738
rnpA	A0A140RQT5	Ribonuclease P protein component OS=Escherichia coli OX=562 GN=rnpA PE=3 SV=1 - [A0A140RQT5_ECOLX]	42.7906	29.41	13	3	3	5	119	13.7616	11.7515	0.000221549	0.000307759	0.000514557	0.00132778	0.71988	-0.474173
C6986_15945	A0A2T1MW78	Transketolase (Fragment) OS=Escherichia coli OX=562 GN=C6986_15945 PE=4 SV=1 - [A0A2T1MW78_ECOLX]	1575.05	42.86	3	1	17	90	406	44.8634	6.21436	0.00022403	0.000311222	0.0475293	0.0153556	0.719838	-0.474256
nudL	A0A073HT37	Uncharacterized Nudix hydrolase NudL OS=Escherichia coli 5-366-08_S1_C3 OX=1444102 GN=nudL PE=3 SV=1 - [A0A073HT37_ECOLX]	109.914	34.9	33	4	4	7	192	21.5084	6.02393	0.000220537	0.000306449	0.00857519	0.00545846	0.719653	-0.474627
apaH	A0A2T1N4C1	Diadenosine tetraphosphatase (Fragment) OS=Escherichia coli OX=562 GN=apaH PE=4 SV=1 - [A0A2T1N4C1_ECOLX]	53.9819	26.82	46	4	4	4	179	20.0404	5.57959	0.00022132	0.000307542	0.000180247	0.00076677	0.719643	-0.474647
dcyD	A0A024KW10	D-cysteine desulfhydrase OS=Escherichia coli D6-113.11 OX=1400022 GN=dcyD PE=3 SV=1 - [A0A024KW10_ECOLX]	695.665	32.93	85	10	10	31	328	35.1892	4.98291	0.000216312	0.000300635	0.0189452	0.00885376	0.719516	-0.4749
yggU	A0A023Z2B8	UPF0235 protein YggU OS=Escherichia coli O145:H28 str. RM12581 OX=1248823 GN=yggU PE=3 SV=1 - [A0A023Z2B8_ECOLX]	86.07	18.75	18	1	1	1	96	10.4078	9.46631	0.00022522	0.000313054	0.00784923	0.00516067	0.71943	-0.475074
smrA	A0A023LEJ2	DNA endonuclease OS=Escherichia coli OX=562 GN=smrA PE=4 SV=1 - [A0A023LEJ2_ECOLX]	34.65	21.39	32	4	4	4	187	21.5131	9.12939	0.000227442	0.000316483	0.00488591	0.00391469	0.718657	-0.476625
CSC15_5453	A0A2T7Y3Q6	Replication-associated recombination protein A OS=Escherichia coli OX=562 GN=CSC15_5453 PE=4 SV=1 - [A0A2T7Y3Q6_ECOLX]	62.3854	13.46	52	5	5	5	379	42.2684	6.02393	0.000217038	0.000302034	0.0174073	0.00840005	0.718589	-0.476761
yaeH	A0A027U240	UPF0325 protein YaeH OS=Escherichia coli O111:NM str. K6722 OX=1446533 GN=yaeH PE=3 SV=1 - [A0A027U240_ECOLX]	793.828	60.16	19	9	9	35	128	15.0429	8.06006	0.000216308	0.000301102	0.00585347	0.00434283	0.718389	-0.477164
C5P43_17380	A0A2S7HSA9	Uncharacterized protein (Fragment) OS=Escherichia coli OX=562 GN=C5P43_17380 PE=4 SV=1 - [A0A2S7HSA9_ECOLX]	102.476	61.82	14	3	3	8	55	5.81488	6.49365	0.000216133	0.000300895	0.0377165	0.013462	0.7183	-0.477342
pykA	Q8XCJ4	Pyruvate kinase OS=Escherichia coli O157:H7 OX=83334 GN=pykA PE=3 SV=2 - [Q8XCJ4_ECO57]	4740.85	72.71	21	1	26	183	480	51.3327	6.90283	0.000218104	0.00030385	0.000152693	0.000702756	0.7178	-0.478347
selU	A0A0K3YJI8	tRNA 2-selenouridine synthase OS=Escherichia coli OX=562 GN=selU PE=3 SV=1 - [A0A0K3YJI8_ECOLX]	0	2.2	1	1	1	1	364	41.1578	6.23975	0.000218396	0.000304262	0.0151017	0.00771447	0.717791	-0.478364
serB	D7X361	Phosphoserine phosphatase SerB (Fragment) OS=Escherichia coli MS 198-1 OX=749549 GN=serB PE=4 SV=1 - [D7X361_ECOLX]	190.65	19.69	54	4	4	9	259	28.3788	5.35107	0.000215527	0.000300461	0.0193908	0.00897992	0.71732	-0.479311
plsC	A0A080FPE7	1-acyl-sn-glycerol-3-phosphate acyltransferase OS=Escherichia coli 1-392-07_S4_C3 OX=1444275 GN=plsC PE=3 SV=1 - [A0A080FPE7_ECOLX]	46.81	10.73	23	2	2	2	205	22.793	9.61279	0.000217101	0.000302706	0.00230467	0.00270023	0.717199	-0.479554
ECW26_02040	I0VYR7	Two component transcriptional regulator, winged helix family OS=Escherichia coli W26 OX=1090926 GN=ECW26_02040 PE=4 SV=1 - [I0VYR7_ECOLX]	22.01	5.88	43	2	2	2	221	25.0983	6.23975	0.000217136	0.000302785	0.000674069	0.001485	0.71713	-0.479694
hflC	A0A0K3YVQ8	Modulator of FtsH protease HflC OS=Escherichia coli OX=562 GN=hflC PE=3 SV=1 - [A0A0K3YVQ8_ECOLX]	2158.51	58.98	11	15	15	77	334	37.6565	6.68311	0.000213375	0.000297981	0.0230546	0.00994419	0.716071	-0.481826
yhdP	A0A2D0NVH9	Uncharacterized protein OS=Escherichia coli O127:H6 OX=168807 GN=yhdP PE=4 SV=1 - [A0A2D0NVH9_ECOLX]	72.9887	7.4	169	7	7	8	1217	133.698	5.49072	0.000218262	0.000304805	0.00757762	0.00504415	0.716069	-0.48183
EL76_4227	A0A0A0F6F6	Protein HflK OS=Escherichia coli G3/10 OX=1455601 GN=EL76_4227 PE=3 SV=1 - [A0A0A0F6F6_ECOLX]	2409.04	68.02	24	22	22	97	419	45.5051	6.43018	0.000214987	0.000300332	0.0182126	0.00864127	0.71583	-0.482311
recA	G3LXX6	Protein RecA (Fragment) OS=Escherichia coli OX=562 GN=recA PE=3 SV=1 - [G3LXX6_ECOLX]	2029.65	69.25	50	16	16	97	348	37.3633	5.32568	0.0002156	0.000301193	0.0478061	0.0154064	0.715821	-0.482329
sufD	A0A0K4IKF3	Component of SufB-SufC-SufD cysteine desulfurase activator complex OS=Escherichia coli OX=562 GN=sufD PE=4 SV=1 - [A0A0K4IKF3_ECOLX]	277.528	21.04	4	1	8	18	423	46.7639	6.88818	0.000231915	0.000324004	0.0314855	0.0120832	0.715778	-0.482416
Q609_ECAC00322G0002	W1XAY7	Hydrogenase 3 maturation protease (Fragment) OS=Escherichia coli DORA_A_5_14_21 OX=1403943 GN=Q609_ECAC00322G0002 PE=4 SV=1 - [W1XAY7_ECOLX]	43.74	25.71	38	1	1	1	35	3.95388	4.08154	0.000210254	0.000293791	0.029913	0.0117093	0.715658	-0.482657
ptrA	A0A125WZN0	Protease 3 OS=Escherichia coli 1-110-08_S3_C1 OX=1444132 GN=ptrA PE=3 SV=1 - [A0A125WZN0_ECOLX]	320.512	23.24	124	18	18	32	951	106.328	5.90967	0.000213057	0.000297822	0.0459607	0.0150632	0.715385	-0.483209
AOX65_17635	A0A0T5XQA8	Protease 4 OS=Escherichia coli OX=562 GN=AOX65_17635 PE=3 SV=1 - [A0A0T5XQA8_ECOLX]	0	3.56	1	1	1	1	618	67.3742	6.31592	0.000230765	0.000322604	0.024274	0.0102446	0.715321	-0.483338
ybjZ	A0A0G3K6Z7	Macrolide export ATP-binding/permease protein MacB OS=Escherichia coli PCN033 OX=1001989 GN=ybjZ PE=3 SV=1 - [A0A0G3K6Z7_ECOLX]	30.24	2.31	14	1	2	2	648	70.6281	6.34131	0.000212735	0.000298304	0.00559482	0.0042292	0.713146	-0.48773
gapA	E0WA13	GapA (Fragment) OS=Escherichia coli OX=562 GN=gapA PE=3 SV=1 - [E0WA13_ECOLX]	6216.6	86.18	3	1	13	177	152	15.8941	8.44092	0.000227818	0.000319843	0.0137219	0.00728746	0.71228	-0.489484
htrB	A0A070V1V1	Lipid A biosynthesis lauroyltransferase OS=Escherichia coli 2-177-06_S3_C2 OX=1444151 GN=htrB PE=3 SV=1 - [A0A070V1V1_ECOLX]	33.2501	14.71	38	5	5	6	306	35.3553	9.71533	0.000223365	0.000313604	0.0348074	0.0128428	0.712252	-0.489541
NRG857_02160	A0A0H3EFX9	Uncharacterized protein OS=Escherichia coli O83:H1 (strain NRG 857C / AIEC) OX=685038 GN=NRG857_02160 PE=4 SV=1 - [A0A0H3EFX9_ECO8N]	59.43	6.01	111	3	3	3	516	58.7474	6.37939	0.000215472	0.000302569	0.00635097	0.00455279	0.712141	-0.489766
WM48_19990	A0A192EVX4	Lipopolysaccharide 1,2-glucosyltransferase OS=Escherichia coli OX=562 GN=WM48_19990 PE=4 SV=1 - [A0A192EVX4_ECOLX]	119.27	12.08	50	6	6	10	331	38.4967	8.5874	0.000215206	0.000302221	0.0317018	0.012134	0.712083	-0.489883
ECDEC6A_1963	H4UJI7	Uncharacterized protein OS=Escherichia coli DEC6A OX=868160 GN=ECDEC6A_1963 PE=4 SV=1 - [H4UJI7_ECOLX]	26.4	10.63	36	2	2	4	207	22.0342	5.16064	0.000217741	0.000305928	0.0406221	0.0140413	0.711739	-0.49058
hscA	I0VTC9	Chaperone protein HscA OS=Escherichia coli W26 OX=1090926 GN=hscA PE=3 SV=1 - [I0VTC9_ECOLX]	362.593	20.96	76	11	11	22	606	64.5905	5.18604	0.000216173	0.000303766	0.0205972	0.00931031	0.711645	-0.490771
radA	I0VYN9	DNA repair protein RadA OS=Escherichia coli W26 OX=1090926 GN=radA PE=3 SV=1 - [I0VYN9_ECOLX]	183.51	25.94	55	9	9	11	424	45.4188	7.00537	0.000215749	0.000303252	0.0212743	0.00948891	0.711454	-0.491158
rbsB	I2W7I7	D-ribose-binding periplasmic protein OS=Escherichia coli 9.0111 OX=869686 GN=rbsB PE=4 SV=1 - [I2W7I7_ECOLX]	2155.35	65.54	3	3	14	81	296	30.9093	7.47412	0.000219732	0.000308931	0.0332887	0.0125027	0.711266	-0.491539
ECCG_01797	D6HW72	Phage shock protein C OS=Escherichia coli B088 OX=550672 GN=ECCG_01797 PE=4 SV=1 - [D6HW72_ECOLX]	53.09	16.82	26	2	2	3	107	12.1013	4.93213	0.00021753	0.000305968	0.00176403	0.00235032	0.710959	-0.492161
EAMG_03187	A0A1X3I0B8	Putative lipopolysaccharide heptosyltransferase III OS=Escherichia coli M056 OX=656415 GN=EAMG_03187 PE=4 SV=1 - [A0A1X3I0B8_ECOLX]	97.8759	16.14	79	3	3	5	254	28.0594	7.57666	0.000221999	0.000312282	0.0121514	0.006773	0.710893	-0.492296
glgA	I0VW36	Glycogen synthase OS=Escherichia coli W26 OX=1090926 GN=glgA PE=3 SV=1 - [I0VW36_ECOLX]	852.368	28.63	22	11	11	40	468	51.7626	6.69775	0.000217243	0.000305644	0.00684459	0.00475453	0.710774	-0.492537
nagZ	A0A0V9RS21	Beta-hexosaminidase OS=Escherichia coli OX=562 GN=nagZ PE=3 SV=1 - [A0A0V9RS21_ECOLX]	310.256	31.96	90	9	9	16	341	37.5519	6.23975	0.000215079	0.00030264	0.0447779	0.0148371	0.710675	-0.492737
recF	A0A1V2T3T0	DNA replication and repair protein RecF (Fragment) OS=Escherichia coli OX=562 GN=recF PE=3 SV=1 - [A0A1V2T3T0_ECOLX]	0	4.98	38	1	1	1	241	27.719	6.56592	0.000243649	0.000342965	0.0318263	0.0121634	0.710419	-0.493258
fabI	D7X4P6	Enoyl-[acyl-carrier-protein] reductase (NADH) (Fragment) OS=Escherichia coli MS 198-1 OX=749549 GN=fabI PE=4 SV=1 - [D7X4P6_ECOLX]	2674.81	60.4	23	12	12	120	250	26.5134	6.12549	0.000211964	0.00029839	0.00311399	0.00316462	0.710358	-0.493382
topA	A0A0E2L646	DNA topoisomerase 1 OS=Escherichia coli (strain UMEA 3162-1) OX=1281200 GN=topA PE=3 SV=1 - [A0A0E2L646_ECOU3]	1352.72	45.9	74	17	33	70	865	97.3193	8.38232	0.000210866	0.000296871	0.0214632	0.00953789	0.710293	-0.493513
AC16_5356	A0A070U9V8	Ribosome small subunit-dependent GTPase A (Fragment) OS=Escherichia coli 2-177-06_S3_C2 OX=1444151 GN=AC16_5356 PE=3 SV=1 - [A0A070U9V8_ECOLX]	242.316	25.36	62	7	7	10	343	38.3167	6.41748	0.000209661	0.000295336	0.0245736	0.0103199	0.709908	-0.494296
spoT	B2DFV6	Guanosine-3',5'-bis(Diphosphate) 3'-diphosphatase (Fragment) OS=Escherichia coli OX=562 GN=spoT PE=3 SV=1 - [B2DFV6_ECOLX]	168.838	13.13	38	9	9	15	693	78.0687	8.646	0.000209817	0.000295601	0.00325371	0.00323288	0.709797	-0.494521
rsmB	A0A066SYQ7	Ribosomal RNA small subunit methyltransferase B OS=Escherichia coli OX=562 GN=rsmB PE=3 SV=1 - [A0A066SYQ7_ECOLX]	51.2433	12.82	88	4	4	5	429	48.226	7.28369	0.000211802	0.00029849	0.00501691	0.00396645	0.709577	-0.494968
tsaB	A0A066SS85	tRNA (Adenosine(37)-N6)-threonylcarbamoyltransferase complex dimerization subunit type 1 TsaB OS=Escherichia coli OX=562 GN=tsaB PE=4 SV=1 - [A0A066SS85_ECOLX]	129.953	25.54	70	4	4	5	231	25.1456	5.05908	0.000213421	0.000301156	0.00485573	0.00390257	0.708672	-0.496811
hslO	A0A0E2U4A5	33 kDa chaperonin OS=Escherichia coli O121:H19 str. 2010C-3609 OX=1446560 GN=hslO PE=3 SV=1 - [A0A0E2U4A5_ECOLX]	1046.48	45.21	12	1	8	43	292	32.4989	4.48779	0.000213541	0.000301415	0.0359409	0.013089	0.708461	-0.497239
aroC	A0A066T8V4	Chorismate synthase OS=Escherichia coli OX=562 GN=aroC PE=3 SV=1 - [A0A066T8V4_ECOLX]	244.765	33.52	55	10	10	16	361	39.141	6.20166	0.000209501	0.000295723	0.0492361	0.0156645	0.708435	-0.497293
rimN	A0A2D0P2P4	Threonylcarbamoyl-AMP synthase OS=Escherichia coli O127:H6 OX=168807 GN=rimN PE=3 SV=1 - [A0A2D0P2P4_ECOLX]	117.063	29.25	39	3	3	8	147	16.1545	8.49951	0.000216105	0.000305177	0.0305085	0.0118526	0.708131	-0.497913
BMR23_14260	A0A2B7LVP0	Transporter OS=Escherichia coli OX=562 GN=BMR23_14260 PE=4 SV=1 - [A0A2B7LVP0_ECOLX]	806.323	68.31	169	7	7	31	142	14.4958	8.1626	0.000210526	0.000297328	0.00674229	0.00471376	0.708061	-0.498055
BHF46_08775	A0A1E5WYR5	Two-component system response regulator ArcA OS=Escherichia coli OX=562 GN=BHF46_08775 PE=4 SV=1 - [A0A1E5WYR5_ECOLX]	1668.05	46.64	52	10	10	92	238	27.2489	5.32568	0.000216295	0.000305535	0.00543565	0.00415713	0.707922	-0.498338
BET08_30425	A0A1V2SSN6	Sugar-phosphatase (Fragment) OS=Escherichia coli OX=562 GN=BET08_30425 PE=4 SV=1 - [A0A1V2SSN6_ECOLX]	397.988	34.6	68	8	8	20	263	29.5762	6.16357	0.000213778	0.000301999	0.000830182	0.00161675	0.707877	-0.498429
rpsK	A0A061YF40	30S ribosomal protein S11 OS=Escherichia coli OX=562 GN=rpsK PE=3 SV=1 - [A0A061YF40_ECOLX]	702.675	66.67	9	7	7	44	129	13.8644	11.3267	0.000213259	0.000301333	0.0258141	0.0106605	0.707718	-0.498753
fruB_1	A0A0K4J9R1	Multiphosphoryl transfer protein [includes: phosphocarrier protein Hpr; fructose-specific PTS system EIIA component] OS=Escherichia coli OX=562 GN=fruB_1 PE=4 SV=1 - [A0A0K4J9R1_ECOLX]	304.02	37.77	5	1	10	16	376	39.7296	5.021	0.000207553	0.000293322	0.0116341	0.0065989	0.707596	-0.499003
BET08_15750	A0A1V2T942	Integration host factor subunit alpha (Fragment) OS=Escherichia coli OX=562 GN=BET08_15750 PE=3 SV=1 - [A0A1V2T942_ECOLX]	935.735	70.41	6	9	9	60	98	11.2159	9.34912	0.000213847	0.000302244	0.00999875	0.00600587	0.707531	-0.499134
yrbB	A0A0E1LCH6	Protein YrbB OS=Escherichia coli OX=562 GN=yrbB PE=4 SV=1 - [A0A0E1LCH6_ECOLX]	125.057	46.67	21	3	3	9	90	9.85326	5.09717	0.00021563	0.0003049	0.0311649	0.0120081	0.707215	-0.499779
BK248_18410	A0A1M0CW45	Uncharacterized protein OS=Escherichia coli OX=562 GN=BK248_18410 PE=4 SV=1 - [A0A1M0CW45_ECOLX]	341.827	29.53	23	1	13	26	569	62.211	5.85889	0.000224352	0.000317373	0.00293455	0.00307226	0.706903	-0.500416
AZZ83_003243	A0A243UY73	mRNA interferase MazF OS=Escherichia coli OX=562 GN=AZZ83_003243 PE=4 SV=1 - [A0A243UY73_ECOLX]	65.26	48.65	21	3	3	3	74	8.06124	9.29053	0.000214491	0.000303509	0.0189382	0.00885177	0.706705	-0.500821
moeA	A0A0K4LU10	Molybdopterin biosynthesis protein OS=Escherichia coli OX=562 GN=moeA PE=4 SV=1 - [A0A0K4LU10_ECOLX]	236.519	17.03	3	1	4	9	411	44.0166	5.26221	0.000211103	0.000298721	0.00717776	0.00488377	0.706689	-0.500852
AUQ13_27775	A0A1S0WII2	Nickel responsive regulator (Fragment) OS=Escherichia coli OX=562 GN=AUQ13_27775 PE=4 SV=1 - [A0A1S0WII2_ECOLX]	51.4697	45.36	17	2	2	3	97	10.8834	6.50732	0.000216224	0.000306103	0.0486215	0.0155543	0.706376	-0.501492
G925_03336	A0A0E2L2K5	Inner membrane protein yqjE OS=Escherichia coli (strain UMEA 3162-1) OX=1281200 GN=G925_03336 PE=4 SV=1 - [A0A0E2L2K5_ECOU3]	93.6533	26.87	17	5	5	8	134	15.1232	7.59131	0.000215514	0.000305225	0.0429424	0.0144839	0.706084	-0.502087
rnt	A0A085NZ79	Ribonuclease T OS=Escherichia coli OX=562 GN=rnt PE=3 SV=1 - [A0A085NZ79_ECOLX]	50.23	20	31	3	3	6	215	23.4896	5.38916	0.000208775	0.000295681	0.0478367	0.015412	0.70608	-0.502096
lgt	Q14F20	Prolipoprotein diacylglyceryl transferase (Fragment) OS=Escherichia coli OX=562 GN=lgt PE=3 SV=1 - [Q14F20_ECOLX]	21.38	6.9	22	1	1	1	174	19.7913	9.68604	0.000216671	0.000307024	0.00917436	0.00569033	0.705716	-0.502841
vacJ	A0A0K3YUG8	Lipoprotein OS=Escherichia coli OX=562 GN=vacJ PE=4 SV=1 - [A0A0K3YUG8_ECOLX]	198.465	31.08	28	6	6	19	251	27.9757	5.04639	0.000219024	0.000310364	0.00628328	0.00452411	0.705703	-0.502868
nhoA	A0A0D0LMP9	N-hydroxyarylamine O-acetyltransferase OS=Escherichia coli OX=562 GN=nhoA PE=3 SV=1 - [A0A0D0LMP9_ECOLX]	0	6.05	2	1	1	1	281	32.3101	6.12549	0.000213608	0.000303138	0.00304201	0.00312823	0.704658	-0.505005
BMR23_07815	A0A2B7MII7	Universal stress protein UspG OS=Escherichia coli OX=562 GN=BMR23_07815 PE=4 SV=1 - [A0A2B7MII7_ECOLX]	636.996	50.7	4	1	7	49	142	15.9283	6.7417	0.000212063	0.000300994	0.0379803	0.0135161	0.704543	-0.505239
tyrR	Q9LA28	Transcriptional regulation of aroF, aroG, tyrA and aromatic amino acid transport OS=Escherichia coli O157:H7 OX=83334 GN=tyrR PE=4 SV=2 - [Q9LA28_ECO57]	408.296	33.72	59	14	15	29	513	57.6656	5.88428	0.000212209	0.000301436	0.000980719	0.00173834	0.703995	-0.506362
murD	A0A028AH27	UDP-N-acetylmuramoylalanine--D-glutamate ligase OS=Escherichia coli O69:H11 str. 08-4661 OX=1446753 GN=murD PE=3 SV=1 - [A0A028AH27_ECOLX]	374.577	34.02	58	10	10	29	438	46.8909	5.31299	0.000211051	0.00030009	0.0110951	0.0064109	0.703294	-0.5078
Q609_ECAC01196G0001	W1X5I7	Undecaprenyl-phosphate 4-deoxy-4-formamido-L-arabinose transferase (Fragment) OS=Escherichia coli DORA_A_5_14_21 OX=1403943 GN=Q609_ECAC01196G0001 PE=4 SV=1 - [W1X5I7_ECOLX]	69.8697	8.58	44	2	2	4	233	26.4394	6.68311	0.000206129	0.000293212	0.00122114	0.00192282	0.703006	-0.508392
AC93_3013	A0A029ILZ6	Phosphoenolpyruvate-protein phosphotransferase OS=Escherichia coli 2-005-03_S4_C2 OX=1444228 GN=AC93_3013 PE=3 SV=1 - [A0A029ILZ6_ECOLX]	202.177	17.25	40	11	11	19	748	83.7168	5.78271	0.000214416	0.000305011	0.032042	0.0122142	0.702976	-0.508452
rsmC	A0A2R9W4T8	Ribosomal RNA small subunit methyltransferase C OS=Escherichia coli OX=562 GN=rsmC PE=3 SV=1 - [A0A2R9W4T8_ECOLX]	575.148	38.78	21	3	10	31	343	37.6151	6.80029	0.00021132	0.000300642	0.00411656	0.00359511	0.702896	-0.508617
yhbM	A0A024KN71	Lipoprotein NlpI OS=Escherichia coli D6-113.11 OX=1400022 GN=yhbM PE=4 SV=1 - [A0A024KN71_ECOLX]	149.612	38.44	19	8	8	13	294	33.5768	4.70361	0.000214492	0.000305175	0.0222053	0.00973017	0.702849	-0.508713
ubiD	A8A6U8	3-octaprenyl-4-hydroxybenzoate carboxy-lyase OS=Escherichia coli O9:H4 (strain HS) OX=331112 GN=ubiD PE=3 SV=2 - [UBID_ECOHS]	430.682	19.64	63	9	9	28	494	55.2362	5.57959	0.000216117	0.0003075	0.0207211	0.00934336	0.702822	-0.508768
Q609_ECAC02614G0001	W1W882	Cystathionine beta-lyase metC (Fragment) OS=Escherichia coli DORA_A_5_14_21 OX=1403943 GN=Q609_ECAC02614G0001 PE=3 SV=1 - [W1W882_ECOLX]	28.03	15	87	3	3	3	260	28.6087	5.73193	0.000206866	0.000294607	0.001489	0.00214791	0.702176	-0.510096
nuoB	A1ADD5	NADH-quinone oxidoreductase subunit B OS=Escherichia coli O1:K1 / APEC OX=405955 GN=nuoB PE=3 SV=1 - [NUOB_ECOK1]	409.261	27.27	7	5	5	23	220	25.0394	5.74463	0.000215196	0.000306534	0.0412429	0.0141604	0.702029	-0.510397
pssA	A0A0K5W2Y4	Phosphatidylserine synthase OS=Escherichia coli OX=562 GN=pssA PE=4 SV=1 - [A0A0K5W2Y4_ECOLX]	1100.19	54.1	42	21	21	61	451	52.7678	9.0708	0.000211606	0.000301446	0.0135768	0.00724059	0.701967	-0.510524
dnaC_1	A0A0K4FV37	DNA replication protein OS=Escherichia coli OX=562 GN=dnaC_1 PE=4 SV=1 - [A0A0K4FV37_ECOLX]	0	4.08	14	1	1	1	245	27.9741	8.98291	0.000217607	0.000310002	0.00999777	0.00600549	0.701952	-0.510557
C1I57_30675	A0A2R9W0Z0	Co-chaperone YbbN (Fragment) OS=Escherichia coli OX=562 GN=C1I57_30675 PE=4 SV=1 - [A0A2R9W0Z0_ECOLX]	1586.77	72.49	36	7	11	53	229	25.4192	4.65283	0.000210967	0.000300553	0.0187012	0.00878371	0.70193	-0.510601
ydcY	A0A061KAB6	DUF2526 domain-containing protein OS=Escherichia coli OX=562 GN=ydcY PE=4 SV=1 - [A0A061KAB6_ECOLX]	46.74	40.26	15	4	4	5	77	8.77949	5.97314	0.000196076	0.000279344	0.0191729	0.00891853	0.701917	-0.510627
rpoN66	E1CBR4	RNA polymerase sigma-54 factor OS=Escherichia coli OX=562 GN=rpoN66 PE=3 SV=1 - [E1CBR4_ECOLX]	112.937	17.97	35	7	7	7	473	53.4582	4.76709	0.000207747	0.000296089	0.00870376	0.00550924	0.701637	-0.511202
lpoA	A0A192EVK2	Penicillin-binding protein activator LpoA OS=Escherichia coli OX=562 GN=lpoA PE=3 SV=1 - [A0A192EVK2_ECOLX]	705.609	43.51	21	2	23	46	678	72.7819	5.42725	0.000208496	0.000297182	0.00531665	0.00410213	0.701578	-0.511324
C6985_23820	A0A2T1LCU7	Si-specific NAD(P)(+) transhydrogenase OS=Escherichia coli OX=562 GN=C6985_23820 PE=4 SV=1 - [A0A2T1LCU7_ECOLX]	601.349	42.92	6	1	13	39	466	51.492	6.7417	0.000193992	0.000276575	0.0389387	0.0137102	0.70141	-0.511669
recG	A0A1V2STZ8	ATP-dependent DNA helicase RecG (Fragment) OS=Escherichia coli OX=562 GN=recG PE=3 SV=1 - [A0A1V2STZ8_ECOLX]	38.15	10.3	124	4	4	4	437	48.2716	8.00146	0.000220062	0.000313961	0.00029967	0.00102072	0.700921	-0.512676
atpE	A0A1D7PV28	ATP synthase subunit c OS=Escherichia coli OX=562 GN=atpE PE=3 SV=1 - [A0A1D7PV28_ECOLX]	57.83	11.39	3	1	1	2	79	8.26243	4.61475	0.000199974	0.000285315	0.0314056	0.0120646	0.700889	-0.512743
BH694_11160	A0A066SNF9	PTS glucose EIICB component OS=Escherichia coli OX=562 GN=BH694_11160 PE=4 SV=1 - [A0A066SNF9_ECOLX]	1156.3	27.67	23	13	13	54	477	50.6738	8.646	0.000208628	0.000297763	0.00190944	0.00244533	0.700652	-0.51323
argR	D5A7F5	Arginine biosynthesis repressor (Fragment) OS=Escherichia coli OX=562 GN=argR PE=3 SV=1 - [D5A7F5_ECOLX]	367.648	23.44	16	2	2	9	128	13.7993	7.18115	0.000207788	0.000296664	0.0135076	0.00721807	0.700414	-0.513721
G925_01499	A0A0E2L6A3	Peroxiredoxin osmC OS=Escherichia coli (strain UMEA 3162-1) OX=1281200 GN=G925_01499 PE=4 SV=1 - [A0A0E2L6A3_ECOU3]	3548.52	56.64	34	8	8	176	143	15.1067	5.85889	0.000207808	0.000296728	0.02413	0.0102095	0.700333	-0.513886
HMPREF1604_03040	V0V2J4	ATP-dependent RNA helicase RhlE (Fragment) OS=Escherichia coli 908519 OX=1268991 GN=HMPREF1604_03040 PE=3 SV=1 - [V0V2J4_ECOLX]	67.1971	13.5	75	5	5	5	437	48.0728	9.81787	0.000210368	0.000300416	0.0011178	0.00183837	0.700257	-0.514044
def	A0A0A6R614	Peptide deformylase OS=Escherichia coli OX=562 GN=def PE=3 SV=1 - [A0A0A6R614_ECOLX]	956.045	62.13	30	9	9	47	169	19.2632	5.22412	0.000212083	0.000302889	0.000616497	0.00143385	0.7002	-0.514161
A8M42_12275	A0A210GI33	Uncharacterized protein OS=Escherichia coli OX=562 GN=A8M42_12275 PE=4 SV=1 - [A0A210GI33_ECOLX]	5221.7	81.05	13	1	6	212	190	19.4593	8.14795	0.000231721	0.000331009	0.0415506	0.0142188	0.700045	-0.514479
C6986_03545	A0A2T1N2N2	DNA-binding response regulator (Fragment) OS=Escherichia coli OX=562 GN=C6986_03545 PE=4 SV=1 - [A0A2T1N2N2_ECOLX]	0	7.37	20	1	1	1	95	10.4065	4.95752	0.000197874	0.00028266	0.03723	0.0133613	0.700041	-0.514489
CWM24_20415	A0A2J1C2V6	Mechanosensitive ion channel protein MscS OS=Escherichia coli OX=562 GN=CWM24_20415 PE=4 SV=1 - [A0A2J1C2V6_ECOLX]	1170.37	36.01	6	1	8	50	286	30.8917	8.32373	0.00021501	0.00030715	0.0323317	0.012282	0.700017	-0.514538
tldD	A0A066SQ03	Metalloprotease TldD OS=Escherichia coli OX=562 GN=tldD PE=4 SV=1 - [A0A066SQ03_ECOLX]	1618.81	47.82	14	1	14	59	481	51.3311	5.09717	0.000208438	0.000297772	0.00649595	0.00461337	0.699993	-0.514588
EAXG_04652	A0A1X3LAA3	Uncharacterized protein OS=Escherichia coli TA054 OX=656433 GN=EAXG_04652 PE=4 SV=1 - [A0A1X3LAA3_ECOLX]	78.5302	21.61	4	1	4	5	199	21.7364	9.24658	0.000212843	0.000304091	0.00158138	0.00221953	0.699931	-0.514715
ECH7EC869_2807	A0A0H3PQW3	Putative sulfatase OS=Escherichia coli O157:H7 (strain EC869) OX=478008 GN=ECH7EC869_2807 PE=4 SV=1 - [A0A0H3PQW3_ECO5C]	206.738	18.54	14	10	10	16	577	66.6249	7.6792	0.00020652	0.000295106	0.0235075	0.0100556	0.699817	-0.51495
arnB	A0A024L0H3	UDP-4-amino-4-deoxy-L-arabinose--oxoglutarateamin otransferase OS=Escherichia coli OX=562 GN=arnB PE=3 SV=1 - [A0A024L0H3_ECOLX]	209.793	18.21	120	5	5	11	368	40.3609	6.88818	0.000210701	0.00030115	0.049529	0.0157165	0.699655	-0.515285
BMR23_05225	A0A2B7MBG4	Glutamate decarboxylase (Fragment) OS=Escherichia coli OX=562 GN=BMR23_05225 PE=3 SV=1 - [A0A2B7MBG4_ECOLX]	10925.2	70.57	14	1	18	508	350	39.5096	5.73193	0.000221148	0.000316125	0.0164869	0.00812601	0.699559	-0.515483
AZZ83_004461	A0A192EQ00	Protein YnjB OS=Escherichia coli OX=562 GN=AZZ83_004461 PE=4 SV=1 - [A0A192EQ00_ECOLX]	191.597	41.49	106	12	12	17	388	42.8499	6.46826	0.000211669	0.000302754	0.00491751	0.0039273	0.699147	-0.516333
BET08_21980	A0A1V2T0N3	Fe2+-dependent dioxygenase (Fragment) OS=Escherichia coli OX=562 GN=BET08_21980 PE=3 SV=1 - [A0A1V2T0N3_ECOLX]	104.04	11.9	76	2	2	2	210	23.874	6.53662	0.000221526	0.000316967	0.0496239	0.0157333	0.698894	-0.516855
rraA	M9G0Q7	4-hydroxy-4-methyl-2-oxoglutarate aldolase OS=Escherichia coli MP021561.2 OX=1116136 GN=rraA PE=3 SV=1 - [M9G0Q7_ECOLX]	1106.21	56.64	16	5	5	68	143	15.2356	4.27197	0.000211684	0.000302896	0.00197347	0.00248487	0.698868	-0.516908
Q609_ECAC02583G0001	W1WDY4	Uncharacterized protein (Fragment) OS=Escherichia coli DORA_A_5_14_21 OX=1403943 GN=Q609_ECAC02583G0001 PE=4 SV=1 - [W1WDY4_ECOLX]	112.25	41.89	67	5	5	6	148	16.3667	10.2134	0.000208838	0.000298867	0.0120512	0.00673975	0.698765	-0.51712
yifE	A0A0K4QZI9	Protein YifE OS=Escherichia coli OX=562 GN=yifE PE=4 SV=1 - [A0A0K4QZI9_ECOLX]	258.407	69.64	10	10	10	25	112	13.0954	6.55127	0.000208632	0.000298936	0.0243919	0.0102732	0.697914	-0.518879
ECJG_00014	F4TDN8	Putative cytoplasmic protein OS=Escherichia coli M718 OX=656419 GN=ECJG_00014 PE=4 SV=1 - [F4TDN8_ECOLX]	32.81	26	39	2	2	4	100	11.5501	9.30518	0.000215672	0.000309156	0.00444248	0.0037287	0.697615	-0.519497
BIQ87_06980	A0A0J2BI29	Bifunctional NADP-dependent 3-hydroxy acid dehydrogenase/3-hydroxypropionate dehydrogenase YdfG OS=Escherichia coli OX=562 GN=BIQ87_06980 PE=3 SV=1 - [A0A0J2BI29_ECOLX]	1285.15	44.35	25	9	9	47	248	27.2618	5.99854	0.000214944	0.000308334	0.00201247	0.0025083	0.697113	-0.520536
mltB	A0A023LJ30	Murein hydrolase B OS=Escherichia coli OX=562 GN=mltB PE=4 SV=1 - [A0A023LJ30_ECOLX]	225.86	30.19	79	6	6	16	361	40.2443	9.0415	0.000207834	0.000298207	0.00116853	0.00188075	0.696946	-0.520881
Q609_ECAC01656G0005	W1X0K3	tRNA 5-methylaminomethyl-2-thiouridine biosynthesis bifunctional protein MnmC (Fragment) OS=Escherichia coli DORA_A_5_14_21 OX=1403943 GN=Q609_ECAC01656G0005 PE=3 SV=1 - [W1X0K3_ECOLX]	21.4	5.97	130	4	4	4	586	64.8415	6.52197	0.000220406	0.000316311	0.0477967	0.0154046	0.696801	-0.521182
ribH	A0A0A0FA85	6,7-dimethyl-8-ribityllumazine synthase OS=Escherichia coli G3/10 OX=1455601 GN=ribH PE=3 SV=1 - [A0A0A0FA85_ECOLX]	833.052	53.85	14	5	5	35	156	16.1326	5.24951	0.00021234	0.000304776	0.0114689	0.00654203	0.696708	-0.521373
FORC28_3819	A0A1D7PNS9	Serine dehydratase OS=Escherichia coli OX=562 GN=FORC28_3819 PE=4 SV=1 - [A0A1D7PNS9_ECOLX]	645.003	27.68	66	9	10	37	448	48.1688	5.40186	0.000205668	0.000295214	0.0311183	0.0119972	0.696673	-0.521446
BET08_24340	A0A1V2SXG4	ATP synthase subunit a (Fragment) OS=Escherichia coli OX=562 GN=BET08_24340 PE=3 SV=1 - [A0A1V2SXG4_ECOLX]	289.772	21.13	15	5	5	15	265	29.5991	7.66455	0.000215013	0.000308686	0.0271177	0.0110063	0.696541	-0.521719
wecG	A0A027ZKA9	UDP-N-acetyl-D-mannosaminuronic acid transferase OS=Escherichia coli O69:H11 str. 08-4661 OX=1446753 GN=wecG PE=3 SV=1 - [A0A027ZKA9_ECOLX]	43.76	25.61	51	5	5	5	246	27.9746	9.5542	0.000215655	0.000309658	0.0029891	0.00310092	0.69643	-0.521949
HMPREF1588_04922	U9Y591	TIGR00370 family protein OS=Escherichia coli 110957 OX=1268975 GN=HMPREF1588_04922 PE=4 SV=1 - [U9Y591_ECOLX]	115.06	32.35	40	4	4	6	204	22.3997	5.08447	0.000215705	0.000309789	0.00645119	0.00459479	0.696297	-0.522225
AZZ83_000432	A0A192ENC8	Metal-binding protein OS=Escherichia coli OX=562 GN=AZZ83_000432 PE=4 SV=1 - [A0A192ENC8_ECOLX]	1264.89	47.37	30	7	7	35	247	26.8747	5.2876	0.00020646	0.000296629	0.0152984	0.00777271	0.696022	-0.522795
tuf	A0A2B7T366	Elongation factor Tu (Fragment) OS=Escherichia coli OX=562 GN=tuf PE=4 SV=1 - [A0A2B7T366_ECOLX]	5692.72	82.74	59	1	9	211	168	18.4822	5.22412	0.000235775	0.000338775	0.0364304	0.0131933	0.695963	-0.522917
HMPREF9534_02063	D7ZCV4	L-asparaginase, type II OS=Escherichia coli MS 69-1 OX=749531 GN=HMPREF9534_02063 PE=4 SV=1 - [D7ZCV4_ECOLX]	2458.01	69.9	6	1	11	126	206	21.9962	8.25049	0.00021526	0.000309398	0.00243955	0.00278664	0.695738	-0.523384
BXT93_08790	A0A1V2GGT8	Lipopolysaccharide ABC transporter permease LptG (Fragment) OS=Escherichia coli OX=562 GN=BXT93_08790 PE=4 SV=1 - [A0A1V2GGT8_ECOLX]	120.869	33.93	34	5	5	9	224	24.7028	9.08545	0.000209523	0.00030129	0.0314356	0.0120716	0.69542	-0.524043
parC	A0A0A1ACN5	DNA topoisomerase 4 subunit A OS=Escherichia coli OX=562 GN=parC PE=3 SV=1 - [A0A0A1ACN5_ECOLX]	256.732	26.86	151	17	17	27	752	83.8185	6.68311	0.00020809	0.000299473	0.00761871	0.00506197	0.694856	-0.525214
lapB	A0A061YB91	Lipopolysaccharide assembly protein B OS=Escherichia coli OX=562 GN=lapB PE=3 SV=1 - [A0A061YB91_ECOLX]	85.9846	15.94	44	5	5	7	389	44.5015	6.39209	0.000210625	0.000303149	0.0200083	0.00915105	0.694792	-0.525347
lolB	B1LH91	Outer-membrane lipoprotein LolB OS=Escherichia coli (strain SMS-3-5 / SECEC) OX=439855 GN=lolB PE=3 SV=1 - [LOLB_ECOSM]	657.194	62.32	15	2	10	32	207	23.552	8.83643	0.000208535	0.000300235	0.00598244	0.00439793	0.694572	-0.525804
ACN77_10640	A0A086U587	Uncharacterized protein OS=Escherichia coli OX=562 GN=ACN77_10640 PE=4 SV=1 - [A0A086U587_ECOLX]	192.354	34.6	63	6	6	11	211	23.167	8.51416	0.000213783	0.000308006	2.71339e-05	0.000247889	0.694087	-0.526812
hfq	A0A0K6D0A9	RNA-binding protein Hfq OS=Escherichia coli OX=562 GN=hfq PE=3 SV=1 - [A0A0K6D0A9_ECOLX]	1511.98	50.98	12	5	5	68	102	11.1866	7.6499	0.000204156	0.00029415	0.024444	0.0102859	0.694055	-0.526878
A8M42_04010	A0A0A7Y0P7	Putative cytoplasmic protein OS=Escherichia coli OX=562 GN=A8M42_04010 PE=4 SV=1 - [A0A0A7Y0P7_ECOLX]	843.619	59.42	14	3	3	32	69	8.06231	9.34912	0.000212369	0.00030606	0.0401396	0.0139477	0.69388	-0.527241
lpxB	A0A069XQX7	Lipid-A-disaccharide synthase OS=Escherichia coli 3-373-03_S4_C2 OX=1444252 GN=lpxB PE=3 SV=1 - [A0A069XQX7_ECOLX]	62.58	7.59	55	2	2	4	382	42.3552	7.25439	0.000202961	0.000292661	0.0398951	0.0138998	0.693503	-0.528027
C5P43_31950	A0A2S7HJC5	ATP-dependent RNA helicase HrpB (Fragment) OS=Escherichia coli OX=562 GN=C5P43_31950 PE=4 SV=1 - [A0A2S7HJC5_ECOLX]	69.83	5.47	104	2	2	3	311	33.5086	8.646	0.000210934	0.000304291	0.000567785	0.00138591	0.693199	-0.528658
pfkA	A0A1X3IEH7	ATP-dependent 6-phosphofructokinase OS=Escherichia coli E1114 OX=550691 GN=pfkA PE=3 SV=1 - [A0A1X3IEH7_ECOLX]	1054.72	52.81	18	14	14	64	320	34.8337	5.71924	0.000207072	0.000298752	0.00333782	0.00327252	0.693122	-0.528819
APX75_01275	A0A2T8H5Z3	UDP-galactose--(Galactosyl) LPS alpha1,2-galactosyltransferase (Fragment) OS=Escherichia coli OX=562 GN=APX75_01275 PE=4 SV=1 - [A0A2T8H5Z3_ECOLX]	97.6	11.89	55	4	4	6	328	37.5636	5.08447	0.000209972	0.000303029	0.0334038	0.0125289	0.692911	-0.529259
ubiC	A0A080I876	Chorismate pyruvate-lyase OS=Escherichia coli 1-250-04_S3_C2 OX=1444163 GN=ubiC PE=3 SV=1 - [A0A080I876_ECOLX]	92.85	32.12	33	4	4	5	165	18.7821	7.1958	0.000210153	0.00030331	0.0110467	0.00639366	0.692865	-0.529354
exuR	A0A0K3XSE9	DNA-binding transcriptional repressor ExuR OS=Escherichia coli OX=562 GN=exuR PE=4 SV=1 - [A0A0K3XSE9_ECOLX]	195.587	30.23	34	7	7	12	258	29.7739	5.63037	0.000215161	0.000310614	0.00282293	0.00301193	0.692696	-0.529705
G925_02328	A0A0E2L5T0	Phosphatase YfbT OS=Escherichia coli (strain UMEA 3162-1) OX=1281200 GN=G925_02328 PE=4 SV=1 - [A0A0E2L5T0_ECOU3]	330.251	33.8	10	2	6	15	216	23.0361	6.13818	0.000219547	0.000317055	0.0299267	0.0117126	0.692455	-0.530209
folX	A0A061YEK6	D-erythro-7,8-dihydroneopterin triphosphate epimerase OS=Escherichia coli OX=562 GN=folX PE=4 SV=1 - [A0A061YEK6_ECOLX]	149.525	37.5	12	5	5	10	120	14.1034	7.06396	0.000216585	0.000312846	0.0433795	0.0145692	0.692306	-0.530519
CIJ94_25095	A0A266HTL0	Stress response serine/threonine protein kinase YihE (Fragment) OS=Escherichia coli OX=562 GN=CIJ94_25095 PE=4 SV=1 - [A0A266HTL0_ECOLX]	118.709	18.14	58	4	4	8	204	23.4718	5.94775	0.000203716	0.000294325	0.000375917	0.00114163	0.692147	-0.53085
ispF	A0A0D8W8U0	2-C-methyl-D-erythritol 2,4-cyclodiphosphate synthase OS=Escherichia coli OX=562 GN=ispF PE=3 SV=1 - [A0A0D8W8U0_ECOLX]	236.001	59.75	20	7	7	13	159	16.8868	6.52197	0.000199482	0.000288237	0.000898576	0.00167484	0.692074	-0.531002
EATG_02756	A0A1X3KL54	Nitrate reductase, alpha subunit OS=Escherichia coli H605 OX=656410 GN=EATG_02756 PE=3 SV=1 - [A0A1X3KL54_ECOLX]	2067.47	40.9	14	1	41	135	1247	140.533	6.50732	0.000212206	0.000306774	0.0283388	0.0113197	0.691736	-0.531706
trmE	A0A066QRY1	tRNA modification GTPase MnmE OS=Escherichia coli OX=562 GN=trmE PE=3 SV=1 - [A0A066QRY1_ECOLX]	628.227	35.24	48	13	13	31	454	49.1827	5.021	0.000205499	0.000297139	0.00179106	0.00236856	0.69159	-0.532011
pyrC	A0A061KYU9	Dihydroorotase OS=Escherichia coli OX=562 GN=pyrC PE=3 SV=1 - [A0A061KYU9_ECOLX]	114.165	29.39	68	9	9	14	347	38.6605	6.18896	0.000211936	0.000306479	0.0178935	0.00854663	0.691517	-0.532164
tdk	A0A029I567	Thymidine kinase OS=Escherichia coli 2-005-03_S4_C3 OX=1444258 GN=tdk PE=3 SV=1 - [A0A029I567_ECOLX]	138.835	30.24	25	1	4	9	205	23.3837	6.99072	0.000213417	0.000308776	0.00108573	0.00181099	0.691171	-0.532885
rnfH	B7MYQ6	Protein RnfH OS=Escherichia coli O81 (strain ED1a) OX=585397 GN=rnfH PE=3 SV=1 - [RNFH_ECO81]	183.335	42.71	17	4	4	9	96	10.7898	8.41162	0.000216474	0.000313271	0.0150112	0.00768746	0.691013	-0.533216
nusG	A0A0K4BTV6	Transcription termination/antitermination protein NusG OS=Escherichia coli OX=562 GN=nusG PE=3 SV=1 - [A0A0K4BTV6_ECOLX]	1566.65	67.96	6	1	10	65	181	20.5455	6.81494	0.000211996	0.000306881	0.0170993	0.0083062	0.690809	-0.533641
mrdA	W1EXF3	Peptidoglycan D,D-transpeptidase MrdA OS=Escherichia coli ISC7 OX=1432555 GN=mrdA PE=3 SV=1 - [W1EXF3_ECOLX]	40.7459	7.03	18	3	3	3	569	64.0651	9.21729	0.000215955	0.000312646	0.000157649	0.000713335	0.690734	-0.533798
ECW26_09430	I0VWP2	Three-deoxy-D-manno-octulosonic-acid transferase domain protein OS=Escherichia coli W26 OX=1090926 GN=ECW26_09430 PE=4 SV=1 - [I0VWP2_ECOLX]	149.034	15.24	50	5	5	8	374	41.053	9.33447	0.000208632	0.000302054	0.0219727	0.00967037	0.690709	-0.53385
C6985_16530	A0A2T1LH30	Repressor LexA OS=Escherichia coli OX=562 GN=C6985_16530 PE=4 SV=1 - [A0A2T1LH30_ECOLX]	379.833	36.63	10	8	8	19	202	22.3589	6.41748	0.000213355	0.000308907	0.00765629	0.0050782	0.690678	-0.533915
RX35_02527	A0A234Y1B9	Glutathione S-transferase GstB OS=Escherichia coli OX=562 GN=RX35_02527 PE=4 SV=1 - [A0A234Y1B9_ECOLX]	577.668	75.33	44	9	9	33	150	17.1776	5.18604	0.000204065	0.000295471	0.0273831	0.0110753	0.690641	-0.533992
menD	A0A023Z040	2-succinyl-5-enolpyruvyl-6-hydroxy-3-cyclohexene-1-carboxylate synthase OS=Escherichia coli O145:H28 str. RM12581 OX=1248823 GN=menD PE=3 SV=1 - [A0A023Z040_ECOLX]	74.16	11.51	113	5	5	10	556	61.2947	6.56592	0.000210223	0.000304417	0.00470909	0.00384259	0.690576	-0.534129
AC93_2960	A0A029IKS2	Mandelate racemase / muconate lactonizing enzyme, C-terminal domain protein OS=Escherichia coli 2-005-03_S4_C2 OX=1444228 GN=AC93_2960 PE=3 SV=1 - [A0A029IKS2_ECOLX]	67.9757	7.67	109	2	2	3	365	39.579	5.89697	0.000215338	0.000312154	0.0120209	0.00672966	0.689846	-0.535654
codA	A0A0K4XFJ2	Cytosine deaminase OS=Escherichia coli OX=562 GN=codA PE=4 SV=1 - [A0A0K4XFJ2_ECOLX]	226.195	21.78	85	8	8	14	427	47.6043	6.40479	0.000202107	0.000292979	0.0128069	0.0069851	0.689834	-0.535679
AZZ83_001033	A0A192ENT6	NAD(P)-dependent oxidoreductase OS=Escherichia coli OX=562 GN=AZZ83_001033 PE=4 SV=1 - [A0A192ENT6_ECOLX]	614.998	46.43	18	2	10	31	252	27.929	6.78564	0.000222372	0.000322356	0.0138596	0.00733159	0.689833	-0.535682
otsA	A0A029HXH7	Trehalose-6-phosphate synthase OS=Escherichia coli 2-005-03_S4_C3 OX=1444258 GN=otsA PE=3 SV=1 - [A0A029HXH7_ECOLX]	667.977	43.88	57	9	20	54	474	53.5378	7.00537	0.000205856	0.000298791	0.00563033	0.00424506	0.688962	-0.537503
argH	A0A0J2ARX7	Argininosuccinate lyase OS=Escherichia coli OX=562 GN=argH PE=3 SV=1 - [A0A0J2ARX7_ECOLX]	119.15	21.01	64	7	7	10	457	50.2747	5.2749	0.000211183	0.000306615	0.0234566	0.0100432	0.688755	-0.537937
EC90111_5489	I2WA29	Trk system potassium uptake protein TrkA, N-terminal domain protein OS=Escherichia coli 9.0111 OX=869686 GN=EC90111_5489 PE=4 SV=1 - [I2WA29_ECOLX]	96.5468	18.47	76	5	5	5	314	35.207	5.99854	0.00020401	0.000296269	0.00620687	0.00449144	0.688596	-0.53827
msbA	D6HUW5	Lipid A export ATP-binding/permease protein MsbA OS=Escherichia coli B088 OX=550672 GN=msbA PE=3 SV=1 - [D6HUW5_ECOLX]	333.012	24.68	33	12	12	20	539	59.6531	8.30908	0.000206143	0.000299393	0.00951708	0.00581769	0.688536	-0.538395
rpe	A0A0E0VAM8	Ribulose-phosphate 3-epimerase OS=Escherichia coli O7:K1 str. CE10 OX=1072459 GN=rpe PE=3 SV=1 - [A0A0E0VAM8_ECOLX]	327.295	39.11	14	6	6	14	225	24.5567	5.31299	0.000205372	0.00029829	0.021319	0.00950053	0.688498	-0.538475
BSR05_01635	A0A2A7MAH7	Selenocysteinyl-tRNA-specific translation elongation factor SelB OS=Escherichia coli OX=562 GN=BSR05_01635 PE=4 SV=1 - [A0A2A7MAH7_ECOLX]	231.417	25.22	123	12	12	18	579	65.0517	6.43018	0.000211387	0.00030703	0.0264604	0.0108335	0.68849	-0.538493
ypeA	A0A061YET8	Acetyltransferase YpeA OS=Escherichia coli OX=562 GN=ypeA PE=3 SV=1 - [A0A061YET8_ECOLX]	82.8821	26.95	22	3	3	8	141	16.2461	4.85596	0.000209785	0.00030473	0.00612182	0.00445635	0.68843	-0.538619
grxD	A0A1X9TN23	Glutaredoxin OS=Escherichia coli OX=562 GN=grxD PE=3 SV=1 - [A0A1X9TN23_ECOLX]	762.873	46.09	8	4	4	28	115	12.9024	4.75439	0.000207429	0.000301325	0.0312405	0.0120259	0.688388	-0.538706
EL75_4391	A0A0A0GPM2	Glucose-1-phosphate thymidylyltransferase OS=Escherichia coli OX=562 GN=EL75_4391 PE=3 SV=1 - [A0A0A0GPM2_ECOLX]	77.43	18.09	45	4	6	7	293	32.6448	5.30029	0.00021465	0.00031182	0.000891165	0.00166879	0.688379	-0.538724
BW70_03285	A0A026V530	Nucleoside triphosphate hydrolase OS=Escherichia coli O174:H8 str. 04-3038 OX=1446704 GN=BW70_03285 PE=4 SV=1 - [A0A026V530_ECOLX]	1753.33	51.16	33	12	12	66	346	38.9996	5.97314	0.000205594	0.000298709	0.0121497	0.00677245	0.688274	-0.538946
uxaC	A0A0G3KC08	Uronate isomerase OS=Escherichia coli PCN033 OX=1001989 GN=uxaC PE=3 SV=1 - [A0A0G3KC08_ECOLX]	1347.25	60.43	38	24	24	87	470	53.9426	5.70654	0.000207637	0.000301679	0.0231056	0.00995683	0.68827	-0.538954
yfcN	A0A069FDX7	UPF0115 protein YfcN OS=Escherichia coli OX=562 GN=yfcN PE=3 SV=1 - [A0A069FDX7_ECOLX]	34.6026	13.11	25	2	2	2	183	20.986	8.29443	0.000212044	0.000308094	0.0481923	0.0154767	0.688244	-0.539008
HMPREF9347_00308	E1J0C8	BolA-like protein (Fragment) OS=Escherichia coli MS 124-1 OX=679205 GN=HMPREF9347_00308 PE=3 SV=1 - [E1J0C8_ECOLX]	36.84	29.09	13	2	2	2	55	6.25126	9.24658	0.000203816	0.000296162	0.00809315	0.00526289	0.688192	-0.539118
gmk	A0A073H4K2	Guanylate kinase OS=Escherichia coli 5-366-08_S1_C3 OX=1444102 GN=gmk PE=3 SV=1 - [A0A073H4K2_ECOLX]	388.09	33.33	22	6	6	19	207	23.606	6.53662	0.000208867	0.000303654	9.98105e-05	0.000562246	0.687844	-0.539847
argP	A0A0E0U2Q6	HTH-type transcriptional regulator ArgP OS=Escherichia coli UMNK88 OX=696406 GN=argP PE=3 SV=1 - [A0A0E0U2Q6_ECOLX]	150.007	28.62	23	7	7	11	297	33.4775	7.15186	0.000211618	0.000307774	0.0404365	0.0140054	0.687575	-0.540411
sfsA	A0A025CKJ7	Sugar fermentation stimulation protein A OS=Escherichia coli O145:NM str. 2010C-3526 OX=1446596 GN=sfsA PE=3 SV=1 - [A0A025CKJ7_ECOLX]	36.34	13.25	37	3	3	3	234	26.2463	7.02002	0.000205545	0.000299009	0.036121	0.0131275	0.68742	-0.540735
BET08_32045	A0A1V2T8F8	Thiamine ABC transporter substrate binding subunit (Fragment) OS=Escherichia coli OX=562 GN=BET08_32045 PE=4 SV=1 - [A0A1V2T8F8_ECOLX]	71.5131	21.89	78	4	4	5	233	25.8282	5.75732	0.000207662	0.000302143	0.000989296	0.00174462	0.687297	-0.540995
lepB	V6FV31	Signal peptidase I OS=Escherichia coli 99.0741 OX=869678 GN=lepB PE=3 SV=1 - [V6FV31_ECOLX]	420.772	32.4	30	11	11	27	321	35.6074	7.32764	0.000210983	0.000307007	0.00869208	0.00550465	0.687225	-0.541145
purL	A0A0K4M656	Phosphoribosylformylglycinamidine synthase OS=Escherichia coli OX=562 GN=purL PE=3 SV=1 - [A0A0K4M656_ECOLX]	160.21	8.03	7	2	8	9	1295	141.451	5.46533	0.000204324	0.000297521	0.00411002	0.00359269	0.686756	-0.542131
djlA	A0A061YNL4	Co-chaperone protein DjlA OS=Escherichia coli OX=562 GN=djlA PE=3 SV=1 - [A0A061YNL4_ECOLX]	183.12	9.96	35	2	2	6	271	30.5756	9.72998	0.000204776	0.000298293	0.0271238	0.0110079	0.686492	-0.542686
pntB	J7QRB4	NAD(P) transhydrogenase subunit beta OS=Escherichia coli OX=562 GN=pntB PE=3 SV=1 - [J7QRB4_ECOLX]	1195.27	29.72	33	1	9	43	461	48.5445	6.13818	0.000210026	0.000305943	0.0311461	0.0120037	0.686486	-0.542698
ECW26_37200	I0VNN6	Cupin family protein OS=Escherichia coli W26 OX=1090926 GN=ECW26_37200 PE=4 SV=1 - [I0VNN6_ECOLX]	613.511	26.14	39	7	7	35	352	39.8016	4.76709	0.000205722	0.000299769	0.0224072	0.00978165	0.686267	-0.543157
skp	A0A2D0NLL4	Periplasmic chaperone OS=Escherichia coli O127:H6 OX=168807 GN=skp PE=4 SV=1 - [A0A2D0NLL4_ECOLX]	2527.07	54.14	4	2	6	107	133	14.8567	9.70068	0.00020547	0.000299469	0.0108413	0.00631989	0.686115	-0.543478
mdh	Q9F6J2	Malate dehydrogenase (Fragment) OS=Escherichia coli OX=562 GN=mdh PE=3 SV=1 - [Q9F6J2_ECOLX]	5054.34	56.85	35	1	12	164	292	30.0711	6.58057	0.00021854	0.000318776	0.0082473	0.00532634	0.685558	-0.544649
zntB	E1IVT7	Zinc transporter (Fragment) OS=Escherichia coli MS 145-7 OX=679204 GN=zntB PE=4 SV=1 - [E1IVT7_ECOLX]	62.6597	16.49	30	4	4	6	291	32.7487	5.84619	0.000211048	0.000307978	0.00171715	0.00231803	0.68527	-0.545255
ECW26_37070	I0VNQ6	Outer membrane-specific lipoprotein transporter subunit LolC OS=Escherichia coli W26 OX=1090926 GN=ECW26_37070 PE=4 SV=1 - [I0VNQ6_ECOLX]	140.348	19.94	58	7	7	9	361	38.9196	5.22412	0.000204289	0.000298129	0.00610467	0.00444922	0.685237	-0.545326
Q609_ECAC01603G0023	W1X094	Aconitate hydratase 1 OS=Escherichia coli DORA_A_5_14_21 OX=1403943 GN=Q609_ECAC01603G0023 PE=3 SV=1 - [W1X094_ECOLX]	3666.98	80.49	2	1	23	169	328	36.5234	5.89697	0.000227919	0.0003327	0.0204201	0.0092628	0.685058	-0.545702
EC970246_2504	I2RYL2	Transcriptional regulator, Fis family OS=Escherichia coli 97.0246 OX=869670 GN=EC970246_2504 PE=4 SV=1 - [I2RYL2_ECOLX]	39.52	12.73	101	2	2	2	165	18.5191	9.39307	0.000210047	0.000306722	0.0419901	0.0143016	0.684812	-0.546221
AC84_1441	A0A074I3R1	DeoR C terminal sensor domain protein OS=Escherichia coli 1-392-07_S4_C1 OX=1444219 GN=AC84_1441 PE=4 SV=1 - [A0A074I3R1_ECOLX]	125.657	23.01	49	5	5	10	239	26.3716	6.22705	0.00020733	0.000302801	0.0335904	0.0125712	0.684707	-0.54644
surE	A0A070UVF9	5'/3'-nucleotidase SurE OS=Escherichia coli 2-177-06_S3_C2 OX=1444151 GN=surE PE=3 SV=1 - [A0A070UVF9_ECOLX]	125.292	28.85	47	5	5	6	253	26.8876	5.77002	0.000204446	0.000298707	0.0220252	0.0096839	0.684436	-0.547013
yacC	A0A0E1LXL1	PulS_OutS family protein OS=Escherichia coli 1303 OX=745156 GN=yacC PE=4 SV=1 - [A0A0E1LXL1_ECOLX]	0	7.84	19	1	1	1	102	11.3176	4.93213	0.00023202	0.000339072	0.0263056	0.0107923	0.68428	-0.547342
C1I57_38565	A0A2R9VWL0	Uncharacterized protein (Fragment) OS=Escherichia coli OX=562 GN=C1I57_38565 PE=4 SV=1 - [A0A2R9VWL0_ECOLX]	31.2	13.92	45	1	1	1	79	8.75967	10.4624	0.000201038	0.000293845	0.025933	0.0106925	0.684163	-0.547587
luxS	A0A0K4SB60	S-ribosylhomocysteine lyase OS=Escherichia coli OX=562 GN=luxS PE=3 SV=1 - [A0A0K4SB60_ECOLX]	1659.56	73.68	24	8	8	78	171	19.3446	5.52881	0.000207736	0.000303641	0.0103486	0.00613853	0.68415	-0.547616
ECO9634_01149	K4XJA4	Hydroxyacylglutathione hydrolase (Fragment) OS=Escherichia coli O111:H8 str. CVM9634 OX=1165944 GN=ECO9634_01149 PE=3 SV=1 - [K4XJA4_ECOLX]	472.687	36.44	31	1	6	24	247	27.9301	5.57959	0.000209602	0.000306742	0.0135585	0.00723464	0.683317	-0.549373
ybeA	A0A066RGM0	Ribosomal RNA large subunit methyltransferase H OS=Escherichia coli OX=562 GN=ybeA PE=3 SV=1 - [A0A066RGM0_ECOLX]	34.13	29.68	14	4	4	7	155	17.3602	8.66064	0.000208606	0.000305329	0.0104816	0.00618811	0.683218	-0.549582
I3S_04835	A0A2S1UJ47	Thioredoxin-disulfide reductase OS=Escherichia coli O121 str. RM8352 OX=1055543 GN=I3S_04835 PE=4 SV=1 - [A0A2S1UJ47_ECOLX]	1538.83	62.93	6	1	13	74	321	34.6004	5.63037	0.000203314	0.000297632	0.0257024	0.0106303	0.683106	-0.549818
yhbY	A0A0K4I3E9	Putative RNA-binding protein OS=Escherichia coli OX=562 GN=yhbY PE=4 SV=1 - [A0A0K4I3E9_ECOLX]	150.142	30.93	10	3	3	15	97	10.763	9.37842	0.000207886	0.000304342	0.0161088	0.0080121	0.683067	-0.549902
yibF	A0A0A1ABR5	Glutathione S-transferase OS=Escherichia coli OX=562 GN=yibF PE=4 SV=1 - [A0A0A1ABR5_ECOLX]	343.327	45.05	26	8	8	15	202	22.5048	5.17334	0.000205222	0.000300498	0.0293877	0.011581	0.68294	-0.550169
C1I57_34030	A0A2R9VYY2	Uncharacterized protein (Fragment) OS=Escherichia coli OX=562 GN=C1I57_34030 PE=4 SV=1 - [A0A2R9VYY2_ECOLX]	124.593	34.02	24	4	4	12	97	10.9244	5.45264	0.000211797	0.000310143	0.000803042	0.00159223	0.682901	-0.550251
cutC	D8A312	Copper homeostasis protein CutC OS=Escherichia coli (strain MS 21-1) OX=749527 GN=cutC PE=3 SV=1 - [D8A312_ECOMS]	221.905	31.51	76	7	7	12	238	25.5269	6.34131	0.000207504	0.000304	0.0276612	0.011147	0.682581	-0.550927
murC	A0A070V8M9	UDP-N-acetylmuramate--L-alanine ligase OS=Escherichia coli 2-177-06_S3_C2 OX=1444151 GN=murC PE=3 SV=1 - [A0A070V8M9_ECOLX]	331.779	34.62	37	10	10	18	491	53.5503	5.75732	0.00020377	0.000298531	0.0190873	0.00889424	0.682575	-0.550941
plsB	A0A0A0FAW1	Glycerol-3-phosphate acyltransferase OS=Escherichia coli G3/10 OX=1455601 GN=plsB PE=3 SV=1 - [A0A0A0FAW1_ECOLX]	631.418	38.12	49	23	23	52	766	86.793	8.08936	0.000205199	0.000300682	0.0404673	0.0140114	0.682446	-0.551214
trmJ	A0A0F3VUR1	tRNA (cytidine/uridine-2'-O-)-methyltransferase TrmJ OS=Escherichia coli OX=562 GN=trmJ PE=4 SV=1 - [A0A0F3VUR1_ECOLX]	355.615	32.65	30	6	6	12	245	26.8738	6.21436	0.000203927	0.000298874	0.0209251	0.00939739	0.682315	-0.551489
BH694_24795	A0A066T414	DUF416 domain-containing protein OS=Escherichia coli OX=562 GN=BH694_24795 PE=4 SV=1 - [A0A066T414_ECOLX]	233.476	45.41	27	8	8	17	196	22.5081	4.55127	0.000207336	0.000303879	0.000432326	0.00122365	0.6823	-0.551522
yggG_3	A0A0G3JQT0	Beta-barrel assembly-enhancing protease OS=Escherichia coli OX=562 GN=yggG_3 PE=3 SV=1 - [A0A0G3JQT0_ECOLX]	1155.73	41.68	46	13	15	42	487	53.8704	7.6792	0.000205405	0.000301153	0.0112659	0.00647122	0.68206	-0.55203
plsX	A0A066RGB5	Phosphate acyltransferase OS=Escherichia coli OX=562 GN=plsX PE=3 SV=1 - [A0A066RGB5_ECOLX]	97.9633	12.14	41	4	4	4	346	37.1149	9.17334	0.000207723	0.000304559	0.0150496	0.00769892	0.682044	-0.552063
mdoG	A0A0K3YU76	Glucans biosynthesis protein G OS=Escherichia coli OX=562 GN=mdoG PE=3 SV=1 - [A0A0K3YU76_ECOLX]	935.47	60	9	21	21	65	500	56.5105	7.21045	0.000203892	0.000298943	0.0135182	0.00722154	0.682044	-0.552064
BW70_12160	A0A026UX57	Glucosyltransferase I RfaG OS=Escherichia coli O174:H8 str. 04-3038 OX=1446704 GN=BW70_12160 PE=4 SV=1 - [A0A026UX57_ECOLX]	96.5057	17.65	68	7	7	8	374	42.5277	7.85498	0.000207569	0.000304393	0.00497879	0.00395153	0.681911	-0.552345
BK334_22780	A0A0A1AAB3	DUF2559 domain-containing protein OS=Escherichia coli OX=562 GN=BK334_22780 PE=4 SV=1 - [A0A0A1AAB3_ECOLX]	276.373	36.36	10	1	1	11	55	6.50651	10.4917	0.000205071	0.000300767	0.000248301	0.000921209	0.681828	-0.55252
cmoB	A0A024KWN3	tRNA U34 carboxymethyltransferase OS=Escherichia coli D6-113.11 OX=1400022 GN=cmoB PE=3 SV=1 - [A0A024KWN3_ECOLX]	135.075	27.24	41	7	7	11	323	36.9991	6.60986	0.00020527	0.000301099	0.0106321	0.00624368	0.681736	-0.552714
rcnR	A0A070UTE4	Transcriptional repressor rcnR OS=Escherichia coli 2-177-06_S3_C2 OX=1444151 GN=rcnR PE=4 SV=1 - [A0A070UTE4_ECOLX]	55.7267	28.89	18	3	3	4	90	10.1005	8.19189	0.000202525	0.000297116	0.000585766	0.00140415	0.681635	-0.55293
parE	A0A066STB3	DNA topoisomerase 4 subunit B OS=Escherichia coli OX=562 GN=parE PE=3 SV=1 - [A0A066STB3_ECOLX]	131.35	16.19	60	10	10	15	630	70.2138	5.65576	0.000204077	0.000299466	0.00205225	0.00253172	0.681472	-0.553274
A8C65_03115	A0A061KH19	DeoR/GlpR family transcriptional regulator OS=Escherichia coli OX=562 GN=A8C65_03115 PE=4 SV=1 - [A0A061KH19_ECOLX]	286.34	17.46	95	4	4	10	252	28.0614	6.26514	0.000206394	0.000302895	0.0171317	0.0083156	0.681406	-0.553413
yccJ	P0AB16	Uncharacterized protein YccJ OS=Escherichia coli O157:H7 OX=83334 GN=yccJ PE=4 SV=1 - [YCCJ_ECO57]	1408.27	76	6	5	5	56	75	8.51918	4.7417	0.000207018	0.000303832	2.67395e-05	0.000246522	0.681357	-0.553517
G925_02640	A0A0E2L3E4	Acyl-CoA synthetase OS=Escherichia coli (strain UMEA 3162-1) OX=1281200 GN=G925_02640 PE=4 SV=1 - [A0A0E2L3E4_ECOU3]	227.598	19.19	108	15	15	25	886	97.843	6.7124	0.000205604	0.000301892	0.000812033	0.00160045	0.68105	-0.554168
C1I57_27315	A0A2R9W2S5	Replicative DNA helicase (Fragment) OS=Escherichia coli OX=562 GN=C1I57_27315 PE=3 SV=1 - [A0A2R9W2S5_ECOLX]	158.067	12.53	39	5	5	9	447	49.6954	5.0083	0.000210487	0.000309095	0.0189345	0.00885072	0.680979	-0.554318
rimP	A0A2H4TUJ8	Ribosome maturation factor RimP OS=Escherichia coli OX=562 GN=rimP PE=3 SV=1 - [A0A2H4TUJ8_ECOLX]	157.206	47.78	17	4	4	13	90	10.1082	5.12256	0.000205105	0.000301227	7.19875e-06	0.000142937	0.6809	-0.554485
uspG	A0A0G3K4L9	Universal stress protein UspG OS=Escherichia coli PCN033 OX=1001989 GN=uspG PE=4 SV=1 - [A0A0G3K4L9_ECOLX]	853.492	67.61	22	3	9	68	142	15.9603	6.43018	0.000210245	0.000308803	0.0189045	0.00884212	0.680838	-0.554616
rcsC	A0A073UQS5	Sensor histidine kinase RcsC OS=Escherichia coli 5-366-08_S1_C1 OX=1444047 GN=rcsC PE=3 SV=1 - [A0A073UQS5_ECOLX]	48.0037	7.24	123	5	5	5	926	103.723	5.92236	0.000211327	0.000310585	5.96226e-05	0.000409594	0.680417	-0.555509
A9819_20805	A0A085P9I7	YicC family protein OS=Escherichia coli OX=562 GN=A9819_20805 PE=4 SV=1 - [A0A085P9I7_ECOLX]	1225.76	59.93	42	17	17	66	287	33.1523	5.12256	0.000205047	0.0003014	0.00193059	0.00245854	0.680314	-0.555727
ybeY	A0A1E5M7G6	Endoribonuclease YbeY OS=Escherichia coli OX=562 GN=ybeY PE=3 SV=1 - [A0A1E5M7G6_ECOLX]	68.51	9.68	11	1	1	3	155	17.5125	4.41162	0.000207864	0.000305573	0.00243956	0.00278665	0.680245	-0.555874
C6985_20255	A0A2T1LE54	30S ribosomal protein S12 OS=Escherichia coli OX=562 GN=C6985_20255 PE=4 SV=1 - [A0A2T1LE54_ECOLX]	797.029	50.81	8	5	5	49	124	13.7445	10.8726	0.000203403	0.000299069	0.00219819	0.00262881	0.680121	-0.556137
purR	A0A1Q6BG84	HTH-type transcriptional repressor PurR OS=Escherichia coli OX=562 GN=purR PE=3 SV=1 - [A0A1Q6BG84_ECOLX]	313.043	32.84	18	8	8	16	341	38.1803	6.7417	0.00020415	0.000300215	0.00495378	0.00394168	0.680013	-0.556366
prkB	A0A0H2VBC6	Phosphoribulokinase OS=Escherichia coli O6:H1 (strain CFT073 / ATCC 700928 / UPEC) OX=199310 GN=prkB PE=3 SV=1 - [A0A0H2VBC6_ECOL6]	198.128	21.8	25	5	5	9	289	32.3914	6.66846	0.000205283	0.000301979	0.0177016	0.00848913	0.679791	-0.556838
fdhD	A0A0K5ZF34	Sulfur carrier protein FdhD OS=Escherichia coli OX=562 GN=fdhD PE=3 SV=1 - [A0A0K5ZF34_ECOLX]	172.211	13.72	61	3	3	6	277	30.5445	6.22705	0.000206101	0.000303186	0.00765261	0.00507662	0.679786	-0.556848
APT94_12310	A0A0D8WD56	PRD domain-containing protein OS=Escherichia coli OX=562 GN=APT94_12310 PE=4 SV=1 - [A0A0D8WD56_ECOLX]	300.347	16.43	98	6	6	18	426	49.0905	7.76709	0.000204221	0.000300575	0.000471842	0.00127609	0.679433	-0.557597
BET08_32640	A0A1V2T7X3	Multidrug ABC transporter permease/ATP-binding protein (Fragment) OS=Escherichia coli OX=562 GN=BET08_32640 PE=4 SV=1 - [A0A1V2T7X3_ECOLX]	39.81	4.12	73	2	2	2	413	45.2207	6.56592	0.00022263	0.000327992	0.0147396	0.00760558	0.678767	-0.559011
BZL31_26970	A0A243ZPE4	Glutamate decarboxylase (Fragment) OS=Escherichia coli OX=562 GN=BZL31_26970 PE=3 SV=1 - [A0A243ZPE4_ECOLX]	3731.06	92.92	4	1	5	208	113	12.7252	5.21143	0.000209954	0.000309323	0.00140625	0.00208029	0.678755	-0.559038
yejL	A7ZP12	UPF0352 protein YejL OS=Escherichia coli O139:H28 (strain E24377A / ETEC) OX=331111 GN=yejL PE=3 SV=1 - [YEJL_ECO24]	55.44	28	4	3	3	3	75	8.27327	5.78271	0.000203626	0.000300057	0.0180175	0.00858355	0.678626	-0.559311
C6986_02695	A0A2T1N308	Multidrug ABC transporter permease/ATP-binding protein (Fragment) OS=Escherichia coli OX=562 GN=C6986_02695 PE=4 SV=1 - [A0A2T1N308_ECOLX]	46.67	3.59	123	2	2	2	502	55.7694	5.87158	0.000207969	0.000306785	0.00165269	0.00227222	0.677899	-0.560857
rlmC	A0A024KQU7	23S rRNA (uracil(747)-C(5))-methyltransferase RlmC OS=Escherichia coli D6-113.11 OX=1400022 GN=rlmC PE=3 SV=1 - [A0A024KQU7_ECOLX]	50.14	6.13	94	2	2	3	375	41.9585	7.02002	0.000199185	0.000293879	0.00337994	0.00329197	0.677778	-0.561116
ECO9455_07749	K4XID8	Uncharacterized protein OS=Escherichia coli O111:H11 str. CVM9455 OX=1165939 GN=ECO9455_07749 PE=4 SV=1 - [K4XID8_ECOLX]	93.5985	53.19	29	3	3	6	94	10.2101	4.93213	0.000216956	0.000320167	0.0228005	0.00988086	0.677633	-0.561423
uvrY	A0A069XLZ4	Response regulator OS=Escherichia coli 3-373-03_S4_C2 OX=1444252 GN=uvrY PE=4 SV=1 - [A0A069XLZ4_ECOLX]	54.8493	15.24	17	2	2	3	164	17.9203	8.66064	0.000215074	0.000317423	0.0157039	0.00789079	0.677564	-0.561571
slmA	A0A2T1MMI8	Nucleoid occlusion factor SlmA (Fragment) OS=Escherichia coli OX=562 GN=slmA PE=4 SV=1 - [A0A2T1MMI8_ECOLX]	60.26	16.67	15	1	1	2	54	6.27106	4.71631	0.000196771	0.000290416	0.0380585	0.0135321	0.677551	-0.561599
dxr	A0A029IDT8	1-deoxy-D-xylulose 5-phosphate reductoisomerase OS=Escherichia coli 2-005-03_S4_C3 OX=1444258 GN=dxr PE=3 SV=1 - [A0A029IDT8_ECOLX]	112.416	22.43	54	9	9	12	379	41.5159	6.01123	0.000206033	0.000304098	0.0239147	0.0101567	0.677523	-0.561659
ycfP	V8FEI2	UPF0227 protein YcfP OS=Escherichia coli ATCC BAA-2209 OX=1405293 GN=ycfP PE=3 SV=1 - [V8FEI2_ECOLX]	525.63	60.56	26	10	10	41	180	21.2287	6.60986	0.000207158	0.000306061	0.0124397	0.00686743	0.676854	-0.563083
nadR_2	A0A061KTF8	NadR DNA-binding transcriptional repressor and NMN adenylyltransferase OS=Escherichia coli OX=562 GN=nadR_2 PE=4 SV=1 - [A0A061KTF8_ECOLX]	304.783	35.37	43	12	12	23	410	47.3177	5.63037	0.000203383	0.000300527	0.00169872	0.0023051	0.676754	-0.563297
crl	A0A073HTR3	Sigma factor-binding protein Crl OS=Escherichia coli 5-366-08_S1_C3 OX=1444102 GN=crl PE=3 SV=1 - [A0A073HTR3_ECOLX]	250.084	27.87	22	3	3	14	122	14.4152	5.07178	0.000202283	0.000298926	0.00895693	0.00560757	0.676699	-0.563413
EAMG_02748	A0A1X3IAN7	Transcriptional regulator, LysR family OS=Escherichia coli M056 OX=656415 GN=EAMG_02748 PE=4 SV=1 - [A0A1X3IAN7_ECOLX]	107.715	17.67	45	5	5	6	300	33.3982	5.69385	0.000207516	0.000306692	0.000926329	0.00169702	0.676624	-0.563573
EC54115_14587	I4SNE9	Uncharacterized protein OS=Escherichia coli 541-15 OX=752785 GN=EC54115_14587 PE=4 SV=1 - [I4SNE9_ECOLX]	1173.87	43.39	10	16	16	52	454	50.9382	6.60986	0.000205714	0.000304259	0.0145199	0.00753845	0.676113	-0.564664
cca	A0A023Z3L8	Multifunctional CCA protein OS=Escherichia coli O145:H28 str. RM12581 OX=1248823 GN=cca PE=3 SV=1 - [A0A023Z3L8_ECOLX]	181.336	23.06	85	9	9	12	412	46.505	6.69775	0.000202179	0.00029904	0.000609486	0.00142723	0.676094	-0.564704
aroB	A0A023Z3P1	3-dehydroquinate synthase OS=Escherichia coli O145:H28 str. RM12581 OX=1248823 GN=aroB PE=3 SV=1 - [A0A023Z3P1_ECOLX]	262.059	24.31	35	7	7	17	362	38.8153	5.85889	0.000198644	0.000293812	0.0125002	0.00688701	0.676094	-0.564705
BY96_06730	A0A027U8Q7	Uncharacterized protein OS=Escherichia coli O111:NM str. K6722 OX=1446533 GN=BY96_06730 PE=4 SV=1 - [A0A027U8Q7_ECOLX]	371.36	18.59	162	21	21	26	1259	136.766	5.09717	0.00020214	0.000299006	0.0149869	0.00768017	0.676039	-0.564822
APT94_08270	A0A0D8WGB4	Heme biosynthesis protein HemY OS=Escherichia coli OX=562 GN=APT94_08270 PE=4 SV=1 - [A0A0D8WGB4_ECOLX]	521.639	48.74	12	17	17	38	398	45.2178	8.17725	0.000200698	0.000297026	0.0157656	0.00790853	0.675692	-0.565561
yaeP	B7M1Z3	UPF0253 protein YaeP OS=Escherichia coli O8 (strain IAI1) OX=585034 GN=yaeP PE=3 SV=1 - [YAEP_ECO8A]	823.872	80.3	9	1	3	32	66	7.20958	4.56396	0.00020781	0.000307672	0.00556846	0.00421739	0.675429	-0.566124
HMPREF9536_00898	D7XIR6	OmpA family protein (Fragment) OS=Escherichia coli MS 84-1 OX=749533 GN=HMPREF9536_00898 PE=3 SV=1 - [D7XIR6_ECOLX]	464.601	54.98	20	5	5	12	211	21.331	9.90576	0.000203942	0.000302035	0.000239824	0.000903053	0.675228	-0.566553
maf_2	A0A023Z385	Maf-like protein YceF OS=Escherichia coli O145:H28 str. RM12581 OX=1248823 GN=maf_2 PE=3 SV=1 - [A0A023Z385_ECOLX]	117.113	30.96	36	5	5	7	197	21.4882	6.11279	0.000203642	0.000301607	0.0136946	0.00727866	0.675191	-0.566632
yoaH	W1F092	UPF0181 protein YoaH OS=Escherichia coli ISC7 OX=1432555 GN=yoaH PE=3 SV=1 - [W1F092_ECOLX]	99.76	42.59	4	1	1	1	54	5.93303	6.50732	0.000222101	0.000328967	0.0144351	0.00751229	0.675146	-0.566729
AZZ83_003412	A0A192EUB9	Metalloprotease OS=Escherichia coli OX=562 GN=AZZ83_003412 PE=3 SV=1 - [A0A192EUB9_ECOLX]	566.387	54.76	7	1	11	22	252	26.8372	6.04932	0.000199096	0.000295032	0.000697481	0.00150429	0.674828	-0.567408
pyrH	A0A0K4FDR2	Uridylate kinase OS=Escherichia coli OX=562 GN=pyrH PE=3 SV=1 - [A0A0K4FDR2_ECOLX]	1227	46.06	7	9	9	68	241	25.9395	7.38623	0.000203971	0.000302387	0.0421254	0.0143269	0.674537	-0.568031
fdx	B7MIL5	[2Fe-2S] ferredoxin OS=Escherichia coli O45:K1 (strain S88 / ExPEC) OX=585035 GN=fdx PE=4 SV=1 - [B7MIL5_ECO45]	375.169	63.06	9	4	4	17	111	12.3509	4.58936	0.000204368	0.000303178	0.00617836	0.00447972	0.674085	-0.568997
uvrD	A0A027ZJG3	DNA helicase OS=Escherichia coli O69:H11 str. 08-4661 OX=1446753 GN=uvrD PE=3 SV=1 - [A0A027ZJG3_ECOLX]	158.289	19.17	67	13	13	18	720	81.9563	6.23975	0.000204169	0.000302897	0.00750503	0.00501252	0.674054	-0.569063
ybaL	A0A024KTC0	Putative monovalent cation:proton antiporter (CPA2 family) OS=Escherichia coli D6-113.11 OX=1400022 GN=ybaL PE=3 SV=1 - [A0A024KTC0_ECOLX]	49.7067	5.56	45	2	3	4	558	59.4003	5.03369	0.000204539	0.000303481	0.00633942	0.00454792	0.673975	-0.569234
C4M78_23275	A0A2S5U6R3	Bifunctional demethylmenaquinone methyltransferase/2-methoxy-6-polyprenyl-1,4-benzoquinol methylase UbiE OS=Escherichia coli OX=562 GN=C4M78_23275 PE=4 SV=1 - [A0A2S5U6R3_ECOLX]	475.835	51	13	1	11	26	251	28.0293	8.01611	0.000203675	0.000302332	0.00405385	0.00357176	0.67368	-0.569865
bamE	A0A229AIH2	Outer membrane protein assembly factor BamE OS=Escherichia coli OX=562 GN=bamE PE=3 SV=1 - [A0A229AIH2_ECOLX]	111.775	17.7	5	1	1	9	113	12.2642	8.51416	0.000206097	0.000305965	0.0283961	0.0113341	0.673597	-0.570043
fusA	A0A0T5XMQ6	Elongation factor G OS=Escherichia coli OX=562 GN=fusA PE=3 SV=1 - [A0A0T5XMQ6_ECOLX]	1194.88	7.14	3	1	4	97	700	77.4541	5.45264	0.000195636	0.000290535	0.0151894	0.0077405	0.673366	-0.570536
truD	A0A0G3K8W6	tRNA pseudouridine synthase D OS=Escherichia coli PCN033 OX=1001989 GN=truD PE=3 SV=1 - [A0A0G3K8W6_ECOLX]	250.493	46.42	64	1	12	22	349	39.0822	6.34131	0.000193149	0.00028687	0.0445867	0.0148009	0.673296	-0.570687
AZZ83_004653	A0A243UVE0	Sensor protein CpxA OS=Escherichia coli OX=562 GN=AZZ83_004653 PE=4 SV=1 - [A0A243UVE0_ECOLX]	246.993	22.59	33	9	9	10	456	51.532	6.17627	0.000206118	0.000306275	0.00381947	0.00348072	0.672983	-0.571358
ECW26_08190	I0VWU0	ATPase family protein OS=Escherichia coli W26 OX=1090926 GN=ECW26_08190 PE=4 SV=1 - [I0VWU0_ECOLX]	105.61	15.54	75	7	7	9	457	51.8892	6.07471	0.000205322	0.000305155	0.0238846	0.0101492	0.672843	-0.571658
glgC	A0A1Q4P9J4	Glucose-1-phosphate adenylyltransferase OS=Escherichia coli OX=562 GN=glgC PE=3 SV=1 - [A0A1Q4P9J4_ECOLX]	1269.31	34.8	38	5	12	67	431	48.6134	5.99854	0.000207428	0.000308366	0.0441402	0.0147158	0.672671	-0.572028
ACN77_16085	A0A0B1BJF5	Histidine triad nucleotide-binding protein OS=Escherichia coli OX=562 GN=ACN77_16085 PE=4 SV=1 - [A0A0B1BJF5_ECOLX]	522.009	43.7	17	5	5	19	119	13.2609	6.17627	0.000210161	0.000312431	0.00277255	0.00298395	0.672661	-0.572048
ECDEC2C_4187	H4KNC2	Glutamate decarboxylase A subunit (Fragment) OS=Escherichia coli DEC2C OX=868140 GN=ECDEC2C_4187 PE=4 SV=1 - [H4KNC2_ECOLX]	5626.38	87.83	33	1	9	224	115	13.0856	5.2749	0.000202524	0.000301111	0.0184994	0.00872522	0.672588	-0.572204
G925_01614	A0A0E2L363	Lipoprotein OS=Escherichia coli (strain UMEA 3162-1) OX=1281200 GN=G925_01614 PE=4 SV=1 - [A0A0E2L363_ECOU3]	67.1	28.04	41	3	3	3	107	12.3343	8.1626	0.000205384	0.000305399	0.000172049	0.000745375	0.672511	-0.57237
HMPREF1589_01146	U9YJQ3	Putative glycine cleavage system transcriptional repressor OS=Escherichia coli 113290 OX=1268976 GN=HMPREF1589_01146 PE=4 SV=1 - [U9YJQ3_ECOLX]	166.06	12.16	24	1	1	10	148	16.2753	5.23682	0.000199247	0.000296369	0.000303699	0.00102784	0.672293	-0.572838
G925_02835	A0A0E2L1B9	Glucitol operon repressor OS=Escherichia coli (strain UMEA 3162-1) OX=1281200 GN=G925_02835 PE=4 SV=1 - [A0A0E2L1B9_ECOU3]	77.77	20.23	25	6	6	8	257	28.1884	5.36377	0.000205817	0.000306182	0.0190128	0.00887306	0.672203	-0.573032
CWS33_01305	A0A0D8WDT7	NUDIX hydrolase OS=Escherichia coli OX=562 GN=CWS33_01305 PE=4 SV=1 - [A0A0D8WDT7_ECOLX]	235.622	35	11	3	5	11	180	20.3929	4.71631	0.000202077	0.000300646	0.00491476	0.00392621	0.672141	-0.573164
pyrD	A0A0A1A6K2	Dihydroorotate dehydrogenase (quinone) OS=Escherichia coli OX=562 GN=pyrD PE=3 SV=1 - [A0A0A1A6K2_ECOLX]	93.24	33.04	42	9	9	10	336	36.8244	7.44482	0.000206339	0.000307214	0.00890683	0.00558828	0.671645	-0.57423
crr	D7ZF03	Glucose-specific phosphotransferase enzyme IIA component (Fragment) OS=Escherichia coli MS 69-1 OX=749531 GN=crr PE=4 SV=1 - [D7ZF03_ECOLX]	2913.2	65.66	10	8	8	123	166	17.8705	4.70361	0.000199934	0.000298163	0.00946358	0.00579805	0.670553	-0.576576
AC93_2282	A0A029IQ03	HTH-type transcriptional repressor YcgE OS=Escherichia coli 2-005-03_S4_C2 OX=1444228 GN=AC93_2282 PE=4 SV=1 - [A0A029IQ03_ECOLX]	81.39	24.65	49	4	4	8	215	24.845	8.646	0.000208778	0.000311364	0.00894379	0.00560252	0.670527	-0.576632
csdE	A0A0A1ADS4	CsdA-binding activator OS=Escherichia coli OX=562 GN=csdE PE=4 SV=1 - [A0A0A1ADS4_ECOLX]	221.417	44.22	39	6	6	11	147	15.9003	6.55127	0.000198966	0.000296863	0.0464802	0.015161	0.670229	-0.577273
lpp	P69778	Major outer membrane lipoprotein OS=Escherichia coli O157:H7 OX=83334 GN=lpp PE=3 SV=1 - [LPP_ECO57]	2605.63	62.82	5	7	7	94	78	8.3183	9.24658	0.000198081	0.000295571	0.0104459	0.00617487	0.670164	-0.577413
kdsB	A0A0K4UBE4	3-deoxy-manno-octulosonate cytidylyltransferase OS=Escherichia coli OX=562 GN=kdsB PE=3 SV=1 - [A0A0K4UBE4_ECOLX]	74.549	33.06	16	1	7	13	248	27.7202	5.65576	0.000207028	0.000309086	0.0490067	0.0156235	0.669807	-0.578182
panB	A0A023YSK8	3-methyl-2-oxobutanoate hydroxymethyltransferase OS=Escherichia coli O145:H28 str. RM12581 OX=1248823 GN=panB PE=3 SV=1 - [A0A023YSK8_ECOLX]	368.33	34.09	67	6	6	18	264	28.3045	5.79541	0.00019918	0.000297468	0.0335477	0.0125615	0.669585	-0.57866
cobB	W1FA42	NAD-dependent protein deacylase OS=Escherichia coli ISC7 OX=1432555 GN=cobB PE=3 SV=1 - [W1FA42_ECOLX]	232.581	47.41	47	7	7	14	251	28.0451	5.87158	0.000203011	0.000303267	0.00181218	0.00238262	0.669415	-0.579027
dnaG	A0A026VAX0	DNA primase OS=Escherichia coli O174:H8 str. 04-3038 OX=1446704 GN=dnaG PE=3 SV=1 - [A0A026VAX0_ECOLX]	46.01	4.99	53	3	3	3	581	65.5393	5.99854	0.000210485	0.0003145	0.000165375	0.000729234	0.669269	-0.579341
Q609_ECAC00107G0002	W1XG20	Pyridoxal-dependent decarboxylase conserved protein (Fragment) OS=Escherichia coli DORA_A_5_14_21 OX=1403943 GN=Q609_ECAC00107G0002 PE=4 SV=1 - [W1XG20_ECOLX]	5726.15	88.14	32	1	9	228	118	13.3267	5.2749	0.000207661	0.000310291	0.00253755	0.00284675	0.669245	-0.579393
gpt	A0A0K4V4L5	Xanthine phosphoribosyltransferase OS=Escherichia coli OX=562 GN=gpt PE=3 SV=1 - [A0A0K4V4L5_ECOLX]	89.8194	31.58	9	4	4	11	152	16.9738	5.84619	0.000201301	0.000300874	0.0254655	0.0105659	0.669055	-0.579803
cmoA	A0A0B0VPV7	Carboxy-S-adenosyl-L-methionine synthase OS=Escherichia coli OX=562 GN=cmoA PE=3 SV=1 - [A0A0B0VPV7_ECOLX]	295.544	40.89	26	9	9	16	247	27.7449	5.60498	0.000204779	0.000306097	0.0196866	0.00906243	0.669	-0.579921
Q609_ECAC00189G0002	W1XEU5	Uncharacterized protein (Fragment) OS=Escherichia coli DORA_A_5_14_21 OX=1403943 GN=Q609_ECAC00189G0002 PE=4 SV=1 - [W1XEU5_ECOLX]	35.52	11.9	7	1	1	2	84	9.47094	9.89111	0.000209241	0.000312987	0.0203737	0.0092503	0.668529	-0.580939
pepB	Q0TEW2	Peptidase B OS=Escherichia coli O6:K15:H31 (strain 536 / UPEC) OX=362663 GN=pepB PE=3 SV=1 - [PEPB_ECOL5]	1164.29	56.67	19	6	22	70	427	46.1983	5.77002	0.000203774	0.000304836	0.00475377	0.00386106	0.668472	-0.581061
accA	Q1RG04	Acetyl-coenzyme A carboxylase carboxyl transferase subunit alpha OS=Escherichia coli (strain UTI89 / UPEC) OX=364106 GN=accA PE=3 SV=1 - [ACCA_ECOUT]	919.315	59.25	20	14	14	55	319	35.2493	6.03662	0.000204231	0.000305568	0.00789549	0.00518023	0.668364	-0.581294
ppx	D7YBN9	Exopolyphosphatase OS=Escherichia coli MS 115-1 OX=749537 GN=ppx PE=3 SV=1 - [D7YBN9_ECOLX]	367.107	41.31	49	15	15	30	489	55.4379	7.23975	0.000205182	0.000307056	0.00270111	0.00294341	0.668224	-0.581597
hslO	A0A0C2E6T8	33 kDa chaperonin OS=Escherichia coli OX=562 GN=hslO PE=3 SV=1 - [A0A0C2E6T8_ECOLX]	1055.85	45.21	39	1	8	41	292	32.5009	4.52588	0.000203708	0.000304905	0.0311776	0.0120111	0.668105	-0.581852
ECW26_38490	I0VNB5	Peptidase S49 domain protein OS=Escherichia coli W26 OX=1090926 GN=ECW26_38490 PE=4 SV=1 - [I0VNB5_ECOLX]	217.443	31.27	46	3	8	15	339	38.1771	9.40771	0.000202028	0.000302391	0.0478725	0.0154185	0.668101	-0.581861
aefA	A0A024KSF4	Mechanosensitive channel protein OS=Escherichia coli D6-113.11 OX=1400022 GN=aefA PE=4 SV=1 - [A0A024KSF4_ECOLX]	309.521	19.07	93	17	17	25	1096	124.153	7.23975	0.000201408	0.000301532	0.035825	0.0130641	0.667949	-0.582191
prs	I0VNK0	Ribose-phosphate pyrophosphokinase OS=Escherichia coli W26 OX=1090926 GN=prs PE=3 SV=1 - [I0VNK0_ECOLX]	2368.49	56.41	13	13	13	116	312	33.8536	5.57959	0.00020222	0.000302764	0.0384192	0.0136055	0.667912	-0.58227
mutL	A0A026V179	DNA mismatch repair protein MutL OS=Escherichia coli O174:H8 str. 04-3038 OX=1446704 GN=mutL PE=3 SV=1 - [A0A026V179_ECOLX]	424.459	24.88	113	12	12	19	615	67.9097	6.771	0.000203482	0.000304871	0.0240268	0.0101842	0.667435	-0.5833
BMR23_15030	A0A2B7M7S6	Acetyl-CoA carboxylase biotin carboxylase subunit OS=Escherichia coli OX=562 GN=BMR23_15030 PE=4 SV=1 - [A0A2B7M7S6_ECOLX]	1599.61	50.11	13	1	21	90	449	49.3053	7.10791	0.000215595	0.000323091	0.0394678	0.0138156	0.66729	-0.583614
rlpB	D7XEM4	LPS-assembly lipoprotein LptE (Fragment) OS=Escherichia coli MS 198-1 OX=749549 GN=rlpB PE=3 SV=1 - [D7XEM4_ECOLX]	670.916	46.02	26	7	7	34	176	19.5	8.11865	0.000199709	0.000299368	0.00281714	0.00300874	0.667103	-0.584019
AZZ83_005165	A0A066SZA9	Methyltransferase OS=Escherichia coli OX=562 GN=AZZ83_005165 PE=3 SV=1 - [A0A066SZA9_ECOLX]	1020.37	59.13	56	15	15	45	345	37.8011	8.77783	0.000200064	0.000299938	0.00930484	0.00573925	0.667016	-0.584207
rpoZ	A0A1X3KA42	DNA-directed RNA polymerase subunit omega OS=Escherichia coli H605 OX=656410 GN=rpoZ PE=3 SV=1 - [A0A1X3KA42_ECOLX]	1618.17	87.91	5	11	11	64	91	10.2304	4.91943	0.000202312	0.000303411	0.00398164	0.00354437	0.666791	-0.584693
prc	A0A024L111	Carboxy-terminal protease for penicillin-binding protein 3 OS=Escherichia coli OX=562 GN=prc PE=3 SV=1 - [A0A024L111_ECOLX]	479.55	31.09	27	1	20	29	682	76.5847	6.78564	0.000192322	0.000288466	0.0101766	0.00607374	0.666708	-0.584873
tesB	A0A1D3KGA5	Acyl-CoA thioesterase OS=Escherichia coli OX=562 GN=tesB PE=4 SV=1 - [A0A1D3KGA5_ECOLX]	230.537	18.82	1	1	4	6	287	32.0243	6.53662	0.000189256	0.000283878	0.00323845	0.00322557	0.666679	-0.584935
gpsA	H4UQZ1	Glycerol-3-phosphate dehydrogenase [NAD(P)+] OS=Escherichia coli DEC6A OX=868160 GN=gpsA PE=3 SV=1 - [H4UQZ1_ECOLX]	853.596	32.41	45	7	7	30	324	34.7558	6.53662	0.000203655	0.000305546	0.00196934	0.00248236	0.666527	-0.585265
glnD	A0A024KL21	Bifunctional uridylyltransferase/uridylyl-removing enzyme OS=Escherichia coli D6-113.11 OX=1400022 GN=glnD PE=3 SV=1 - [A0A024KL21_ECOLX]	151.49	14.04	101	12	12	12	890	102.3	6.72705	0.000203229	0.000304932	0.03645	0.0131974	0.666472	-0.585383
csrA	A0A0A0FK12	Translational regulator CsrA OS=Escherichia coli G3/10 OX=1455601 GN=csrA PE=3 SV=1 - [A0A0A0FK12_ECOLX]	1130.74	42.62	4	2	2	31	61	6.79365	9.40771	0.000201424	0.000302247	0.00219561	0.00262705	0.666422	-0.585491
rlmN	A0A027TYI7	Dual-specificity RNA methyltransferase RlmN OS=Escherichia coli O111:NM str. K6722 OX=1446533 GN=rlmN PE=3 SV=1 - [A0A027TYI7_ECOLX]	107.035	19.79	30	8	8	9	384	43.116	6.69775	0.000198759	0.000298287	0.00112658	0.00184584	0.666334	-0.585682
tpiA	A0A0K3T6N9	Triosephosphate isomerase OS=Escherichia coli OX=562 GN=tpiA PE=3 SV=1 - [A0A0K3T6N9_ECOLX]	5514.78	86.27	21	15	15	214	255	26.9808	5.80811	0.000199797	0.000299845	0.0298323	0.0116897	0.666334	-0.585683
glk	A0A1S6TDL1	Glucokinase OS=Escherichia coli M8 OX=1392854 GN=glk PE=3 SV=1 - [A0A1S6TDL1_ECOLX]	452.013	33.02	40	10	10	25	321	34.717	6.45557	0.000203536	0.000305508	0.00442905	0.00372279	0.666222	-0.585925
HMPREF1604_01487	V0W6G6	Ribosomal RNA large subunit methyltransferase A OS=Escherichia coli 908519 OX=1268991 GN=HMPREF1604_01487 PE=4 SV=1 - [V0W6G6_ECOLX]	44.89	14.94	77	3	3	3	241	27.0938	7.23975	0.000199495	0.000299463	0.00513393	0.00401575	0.666177	-0.586023
Q609_ECAC00435G0002	W1XA11	Osmolarity sensor protein EnvZ (Fragment) OS=Escherichia coli DORA_A_5_14_21 OX=1403943 GN=Q609_ECAC00435G0002 PE=4 SV=1 - [W1XA11_ECOLX]	67.4293	12.85	38	3	3	3	249	27.2848	5.50342	0.000203923	0.000306118	0.0383656	0.0135947	0.666156	-0.586069
HMPREF1588_04095	U9Y421	Ribosomal RNA small subunit methyltransferase E OS=Escherichia coli 110957 OX=1268975 GN=HMPREF1588_04095 PE=3 SV=1 - [U9Y421_ECOLX]	119.316	35.71	34	6	6	11	210	23.1191	5.97314	0.000204117	0.000306415	0.00531837	0.00410293	0.666146	-0.58609
ECDEC1B_2600	H4IDI9	HTH domain protein OS=Escherichia coli DEC1B OX=868134 GN=ECDEC1B_2600 PE=4 SV=1 - [H4IDI9_ECOLX]	42.23	4.66	82	1	1	1	236	25.9565	7.25439	0.000200374	0.00030086	0.042786	0.0144532	0.666003	-0.586399
yegS	A0A024KYB8	Probable lipid kinase YegS OS=Escherichia coli D6-113.11 OX=1400022 GN=yegS PE=3 SV=1 - [A0A024KYB8_ECOLX]	117.494	21.4	50	5	5	14	299	31.9974	4.84326	0.00020379	0.000306029	0.014064	0.00739645	0.665916	-0.586588
greA	A0A025CHB9	Transcription elongation factor GreA OS=Escherichia coli O145:NM str. 2010C-3526 OX=1446596 GN=greA PE=3 SV=1 - [A0A025CHB9_ECOLX]	829.575	84.81	11	13	13	46	158	17.6301	4.79248	0.00019874	0.000298596	0.00313114	0.00317316	0.665581	-0.587313
acnA	A0A2T1LLG5	Aconitate hydratase AcnA OS=Escherichia coli OX=562 GN=acnA PE=4 SV=1 - [A0A2T1LLG5_ECOLX]	3248.14	28.51	11	1	24	157	891	97.4096	5.94775	0.000198384	0.00029816	0.038516	0.0136251	0.66536	-0.587793
Q609_ECAC01917G0003	W1WMK6	Phospholipase A1 (Fragment) OS=Escherichia coli DORA_A_5_14_21 OX=1403943 GN=Q609_ECAC01917G0003 PE=4 SV=1 - [W1WMK6_ECOLX]	72.0894	23.2	38	2	2	3	125	14.3081	4.95752	0.000207121	0.000311327	0.0112682	0.00647204	0.665286	-0.587954
ileS	A0A0V9RAF9	Isoleucine--tRNA ligase OS=Escherichia coli OX=562 GN=ileS PE=3 SV=1 - [A0A0V9RAF9_ECOLX]	2871.12	46.16	14	1	34	139	938	104.319	5.94775	0.000220174	0.000331036	0.0177455	0.00850234	0.665105	-0.588345
AZZ83_001761	A0A192EUJ7	Multidrug ABC transporter ATP-binding protein OS=Escherichia coli OX=562 GN=AZZ83_001761 PE=4 SV=1 - [A0A192EUJ7_ECOLX]	51.29	4.83	133	4	4	4	911	100.778	6.16357	0.000199212	0.000299578	0.00853171	0.00544116	0.664975	-0.588627
HMPREF9552_01246	D7X3R5	HD domain protein OS=Escherichia coli MS 198-1 OX=749549 GN=HMPREF9552_01246 PE=4 SV=1 - [D7X3R5_ECOLX]	115.41	13.07	37	2	2	4	153	17.279	8.1626	0.000209583	0.000315221	0.00107454	0.00180366	0.664874	-0.588847
HMPREF1608_01260	V0Y710	Thiol:disulfide interchange protein (Fragment) OS=Escherichia coli 908525 OX=1268995 GN=HMPREF1608_01260 PE=3 SV=1 - [V0Y710_ECOLX]	423.881	42.99	36	7	7	18	214	23.2147	6.78564	0.00019979	0.000300554	0.00844819	0.00540774	0.664739	-0.58914
fsa	A0A0H0GQ86	Fructose-6-phosphate aldolase OS=Escherichia coli OX=562 GN=fsa PE=3 SV=1 - [A0A0H0GQ86_ECOLX]	162.677	38.64	99	6	6	9	220	23.0522	6.32861	0.000199582	0.000300244	0.00301129	0.00311243	0.664733	-0.589153
yajQ	Q1RFB4	UPF0234 protein YajQ OS=Escherichia coli (strain UTI89 / UPEC) OX=364106 GN=yajQ PE=3 SV=3 - [YAJQ_ECOUT]	2210.72	74.85	18	11	11	84	163	18.3326	6.23975	0.000201895	0.000303736	0.0372602	0.0133675	0.664704	-0.589216
EATG_03441	A0A1X3KTY3	Penicillin-binding protein 1B OS=Escherichia coli H605 OX=656410 GN=EATG_03441 PE=3 SV=1 - [A0A1X3KTY3_ECOLX]	1112.32	40.41	87	29	29	58	834	92.9658	9.08545	0.000199697	0.000300485	0.0217088	0.00960187	0.664584	-0.589476
trkA	A0A0L7AI59	Potassium transporter peripheral membrane component OS=Escherichia coli OX=562 GN=trkA PE=4 SV=1 - [A0A0L7AI59_ECOLX]	152.997	22.49	27	8	8	12	458	50.3104	5.94775	0.000200499	0.000301711	0.000220824	0.00086222	0.66454	-0.589571
rpoA	A0A0J1YB77	DNA-directed RNA polymerase subunit alpha OS=Escherichia coli OX=562 GN=rpoA PE=3 SV=1 - [A0A0J1YB77_ECOLX]	2453.71	63.83	12	18	18	165	329	36.4431	5.05908	0.000199044	0.000299635	0.00770425	0.00509884	0.664288	-0.590119
mtlD	Q5IMD9	Mannitol-1-phosphate dehydrogenase (Fragment) OS=Escherichia coli OX=562 GN=mtlD PE=3 SV=1 - [Q5IMD9_ECOLX]	478.462	52.86	33	1	6	15	210	22.4957	4.79248	0.000206001	0.000310167	0.0284662	0.0113518	0.664161	-0.590396
HMPREF1611_03268	V0YUR1	Uncharacterized protein (Fragment) OS=Escherichia coli 908573 OX=1268998 GN=HMPREF1611_03268 PE=4 SV=1 - [V0YUR1_ECOLX]	12023	88.11	55	1	11	377	143	16.3042	5.59229	0.000210564	0.000317048	0.00462865	0.0038089	0.664141	-0.590439
AC45_4479	A0A070SJD1	ROK family protein OS=Escherichia coli 2-210-07_S3_C3 OX=1444180 GN=AC45_4479 PE=4 SV=1 - [A0A070SJD1_ECOLX]	434.713	37.93	35	12	12	26	406	44.5416	7.35693	0.000201762	0.000303891	0.0490768	0.015636	0.663927	-0.590903
yjdM	A0A0E0VD67	Conserved protein OS=Escherichia coli O7:K1 str. CE10 OX=1072459 GN=yjdM PE=4 SV=1 - [A0A0E0VD67_ECOLX]	595.736	45.05	23	5	5	22	111	12.327	5.12256	0.000198562	0.000299204	0.0207821	0.00935956	0.663634	-0.591539
C9E25_22855	A0A2T3UWD2	Type I restriction endonuclease subunit R OS=Escherichia coli OX=562 GN=C9E25_22855 PE=4 SV=1 - [A0A2T3UWD2_ECOLX]	34.01	1.75	14	1	2	3	1030	118.253	5.61768	0.00020164	0.000303853	0.000425786	0.00121449	0.663609	-0.591596
AZZ83_004288	A0A192ENV8	Protein mlc OS=Escherichia coli OX=562 GN=AZZ83_004288 PE=4 SV=1 - [A0A192ENV8_ECOLX]	208.222	21.18	50	8	8	12	406	44.2813	6.26514	0.000204197	0.000307913	0.00394486	0.00353019	0.663164	-0.592562
G925_03615	A0A0E2L004	ADP compounds hydrolase nudE OS=Escherichia coli (strain UMEA 3162-1) OX=1281200 GN=G925_03615 PE=4 SV=1 - [A0A0E2L004_ECOU3]	167.131	42.47	33	5	5	11	186	21.0798	4.98291	0.000204125	0.00030798	0.0368228	0.0132761	0.662788	-0.593381
BHS81_25900	A0A1X0YJS6	GTPase (Fragment) OS=Escherichia coli OX=562 GN=BHS81_25900 PE=4 SV=1 - [A0A1X0YJS6_ECOLX]	161.533	23.49	79	7	7	13	315	35.259	4.83057	0.000200508	0.000302606	0.0424822	0.0143934	0.662603	-0.593784
Q609_ECAC00156G0004	W1XCX2	Protein tas (Fragment) OS=Escherichia coli DORA_A_5_14_21 OX=1403943 GN=Q609_ECAC00156G0004 PE=4 SV=1 - [W1XCX2_ECOLX]	325.264	29.2	53	7	7	15	274	30.5649	8.63135	0.000200383	0.00030242	0.0431094	0.0145166	0.662599	-0.593792
AD23_2704	A0A029HT93	Pyridoxal kinase OS=Escherichia coli 2-005-03_S4_C3 OX=1444258 GN=AD23_2704 PE=3 SV=1 - [A0A029HT93_ECOLX]	231.839	14.34	62	4	4	7	279	30.4289	5.23682	0.000197005	0.000297455	0.0180195	0.00858417	0.6623	-0.594443
tolR	A0A1X3KQH4	Tol-Pal system protein TolR OS=Escherichia coli H605 OX=656410 GN=tolR PE=3 SV=1 - [A0A1X3KQH4_ECOLX]	68.7659	29.58	16	4	4	5	142	15.3724	6.11279	0.000207974	0.000314187	0.00841844	0.00539578	0.661945	-0.595216
HMPREF1608_00665	V0Y801	Uncharacterized protein (Fragment) OS=Escherichia coli 908525 OX=1268995 GN=HMPREF1608_00665 PE=4 SV=1 - [V0Y801_ECOLX]	119.193	21.89	25	4	4	6	265	29.3875	5.33838	0.000203851	0.000308028	0.00315548	0.00318521	0.661791	-0.595551
cysG	A0A0D8WE80	Siroheme synthase OS=Escherichia coli OX=562 GN=cysG PE=3 SV=1 - [A0A0D8WE80_ECOLX]	188.565	35.23	56	12	12	18	457	49.932	6.1001	0.00020233	0.000305898	0.00600196	0.00440618	0.661428	-0.596344
ppc	A0A023Z5Q1	Phosphoenolpyruvate carboxylase OS=Escherichia coli O145:H28 str. RM12581 OX=1248823 GN=ppc PE=3 SV=1 - [A0A023Z5Q1_ECOLX]	820.272	42.36	60	35	35	71	883	98.9963	5.68115	0.000199376	0.000301449	0.00332079	0.00326458	0.661391	-0.596426
lipB	D7Y9C6	Octanoyltransferase OS=Escherichia coli MS 115-1 OX=749537 GN=lipB PE=3 SV=1 - [D7Y9C6_ECOLX]	62.5416	23.04	34	3	3	4	191	21.31	6.52197	0.000202489	0.000306179	0.0121476	0.00677173	0.661341	-0.596533
BX06_27940	A0A027ZL67	Manganese transport regulator MntR OS=Escherichia coli O69:H11 str. 08-4661 OX=1446753 GN=BX06_27940 PE=4 SV=1 - [A0A027ZL67_ECOLX]	67.82	23.23	25	3	3	3	155	17.5761	6.53662	0.000196652	0.000297413	0.0032054	0.00320962	0.661209	-0.596822
yjeP	A0A2D0P192	Uncharacterized protein OS=Escherichia coli O127:H6 OX=168807 GN=yjeP PE=4 SV=1 - [A0A2D0P192_ECOLX]	152.375	10.46	95	11	11	14	1099	122.958	6.78564	0.00019906	0.000301142	0.0179521	0.0085641	0.661016	-0.597244
rbsD	A0A061YD85	D-ribose pyranase OS=Escherichia coli OX=562 GN=rbsD PE=3 SV=1 - [A0A061YD85_ECOLX]	66.1	24.46	38	4	4	4	139	15.3018	5.96045	0.000205071	0.000310287	0.012525	0.00689501	0.660907	-0.597482
rpoD	A0A074IBT4	RNA polymerase sigma factor RpoD OS=Escherichia coli 1-392-07_S4_C1 OX=1444219 GN=rpoD PE=3 SV=1 - [A0A074IBT4_ECOLX]	1783.18	27.73	33	19	19	73	613	70.1232	4.79248	0.000199189	0.000301469	0.00246855	0.00280465	0.660728	-0.597873
ubiB	A0A0K5HII7	Probable protein kinase UbiB OS=Escherichia coli OX=562 GN=ubiB PE=3 SV=1 - [A0A0K5HII7_ECOLX]	211.887	13	33	7	7	13	546	63.2224	8.86572	0.00020062	0.000303639	0.0329472	0.0124245	0.660718	-0.597894
HMPREF1595_02126	V0SQW8	Toxin YafO family protein OS=Escherichia coli 907672 OX=1268982 GN=HMPREF1595_02126 PE=4 SV=1 - [V0SQW8_ECOLX]	0	27.17	27	2	2	2	92	10.8835	8.23584	0.000199392	0.000301797	0.0249769	0.0104319	0.660681	-0.597973
ispA	A0A029IC64	Farnesyl diphosphate synthase OS=Escherichia coli 2-005-03_S4_C3 OX=1444258 GN=ispA PE=3 SV=1 - [A0A029IC64_ECOLX]	197.053	22.74	48	6	6	8	299	32.1405	5.68115	0.000198466	0.00030044	0.0227709	0.00987346	0.660585	-0.598184
CWM24_12265	A0A2J1C6P0	Uncharacterized protein OS=Escherichia coli OX=562 GN=CWM24_12265 PE=4 SV=1 - [A0A2J1C6P0_ECOLX]	0	3.31	1	1	1	1	332	36.3366	9.43701	0.000210158	0.00031819	0.0110512	0.00639528	0.66048	-0.598412
ydjY	A0A0K3G2T6	Protein YdjY OS=Escherichia coli OX=562 GN=ydjY PE=4 SV=1 - [A0A0K3G2T6_ECOLX]	116.647	32.44	17	6	6	9	225	24.199	7.38623	0.000201485	0.000305059	0.0242322	0.0102344	0.660479	-0.598415
ECIG_01708	F4T395	Putative transcriptional regulator, PadR family OS=Escherichia coli M605 OX=656417 GN=ECIG_01708 PE=4 SV=1 - [F4T395_ECOLX]	213.326	36.32	48	8	8	11	201	22.6753	6.7417	0.000197813	0.000299726	8.41868e-05	0.000509482	0.659979	-0.599508
AC93_4588	A0A029IHJ1	Putative acyl-CoA dehydrogenase AidB OS=Escherichia coli 2-005-03_S4_C2 OX=1444228 GN=AC93_4588 PE=3 SV=1 - [A0A029IHJ1_ECOLX]	757.935	29.02	128	1	11	45	541	60.5818	7.97217	0.000200751	0.000304272	0.00184878	0.00240661	0.659777	-0.599949
O3K_08440	A0A0E0XYD9	Cytochrome c-type protein OS=Escherichia coli O104:H4 (strain 2011C-3493) OX=1133852 GN=O3K_08440 PE=4 SV=1 - [A0A0E0XYD9_ECO1C]	84.8533	5	17	1	1	3	200	23.0973	8.60205	0.000205001	0.000310761	0.00177829	0.00235998	0.659676	-0.600171
ECCG_03354	D6HST2	S-adenosylmethionine:tRNA ribosyltransferase-isomerase (Fragment) OS=Escherichia coli B088 OX=550672 GN=ECCG_03354 PE=3 SV=1 - [D6HST2_ECOLX]	36.6767	11.54	43	3	3	4	286	31.4241	5.17334	0.000203507	0.0003085	0.0232528	0.00999316	0.659668	-0.600189
AD23_4161	A0A029HFV9	Uncharacterized protein OS=Escherichia coli 2-005-03_S4_C3 OX=1444258 GN=AD23_4161 PE=4 SV=1 - [A0A029HFV9_ECOLX]	30.07	14.36	14	3	5	5	404	45.0793	6.25244	0.000200405	0.000303798	0.0293376	0.0115687	0.659665	-0.600195
bamA	D6I568	Outer membrane protein assembly factor BamA OS=Escherichia coli B088 OX=550672 GN=bamA PE=3 SV=1 - [D6I568_ECOLX]	1453.84	44.68	35	29	29	85	808	90.2944	5.12256	0.000199033	0.000301789	8.29761e-05	0.00050512	0.659512	-0.60053
ksgA	Q2EWY5	KsgA (Fragment) OS=Escherichia coli OX=562 GN=ksgA PE=3 SV=1 - [Q2EWY5_ECOLX]	226.882	32.03	44	4	6	15	256	28.4016	7.03467	0.000201375	0.000305439	0.0121466	0.0067714	0.659298	-0.600997
pepA	A0A266FC75	Probable cytosol aminopeptidase OS=Escherichia coli OX=562 GN=pepA PE=3 SV=1 - [A0A266FC75_ECOLX]	988.999	50.1	24	17	17	64	503	54.859	7.2251	0.000191221	0.000290037	0.0362703	0.0131593	0.659298	-0.600998
ileS	A0A2B7MEH8	Isoleucine--tRNA ligase OS=Escherichia coli OX=562 GN=ileS PE=3 SV=1 - [A0A2B7MEH8_ECOLX]	2171.77	38.38	7	1	28	120	938	104.175	5.98584	0.000215935	0.00032765	0.0337697	0.0126117	0.659041	-0.60156
CR539_12880	A0A2I6F5W5	Superoxide dismutase [Cu-Zn] OS=Escherichia coli OX=562 GN=CR539_12880 PE=3 SV=1 - [A0A2I6F5W5_ECOLX]	3340.53	79.19	7	2	9	170	173	17.669	6.63916	0.000201184	0.000305353	0.00706106	0.00483911	0.658858	-0.601961
BU64_34875	A0A070EU70	Endoribonuclease L-PSP OS=Escherichia coli O128:H2 str. 2011C-3317 OX=1446581 GN=BU64_34875 PE=4 SV=1 - [A0A070EU70_ECOLX]	504.102	40.35	32	4	4	21	114	12.4944	5.42725	0.00019648	0.000298239	0.048985	0.0156196	0.6588	-0.602088
mfd	A0A192EML5	Transcription-repair-coupling factor OS=Escherichia coli OX=562 GN=mfd PE=3 SV=1 - [A0A192EML5_ECOLX]	1075.66	37.46	157	37	38	84	1148	129.924	6.12549	0.000199031	0.000302133	0.0346068	0.0127986	0.658754	-0.602188
cspC	D3Y2X0	Cold shock-like protein OS=Escherichia coli OX=562 GN=cspC PE=4 SV=1 - [D3Y2X0_ECOLX]	5112.52	78.26	6	4	4	139	69	7.43981	7.23975	0.000202144	0.000306882	0.036377	0.013182	0.658701	-0.602304
murG	I0VZ44	UDP-N-acetylglucosamine--N-acetylmuramyl-(pentapeptide) pyrophosphoryl-undecaprenol N-acetylglucosamine transferase OS=Escherichia coli W26 OX=1090926 GN=murG PE=3 SV=1 - [I0VZ44_ECOLX]	347.925	39.87	44	10	10	20	311	33.1095	9.43701	0.000201544	0.000306052	0.0420193	0.0143071	0.658529	-0.602682
ECHG_00740	F4SME9	Paraquat-inducible protein B OS=Escherichia coli H736 OX=656414 GN=ECHG_00740 PE=4 SV=1 - [F4SME9_ECOLX]	853.652	37.93	87	21	21	60	733	81.0521	6.91748	0.000195095	0.000296324	0.00134585	0.00202872	0.658383	-0.603
ruvA	A0A1S0WIQ4	Holliday junction ATP-dependent DNA helicase RuvA (Fragment) OS=Escherichia coli OX=562 GN=ruvA PE=3 SV=1 - [A0A1S0WIQ4_ECOLX]	62.4583	26.85	19	4	4	7	149	16.1076	7.25439	0.000199437	0.000302998	0.000454347	0.00125346	0.658211	-0.603378
CV83915_01804	A0A2H4TRJ4	Membrane protein transporter OS=Escherichia coli OX=562 GN=CV83915_01804 PE=4 SV=1 - [A0A2H4TRJ4_ECOLX]	45.0873	12.85	28	5	5	6	428	47.6956	4.90674	0.000198948	0.000302337	0.0137683	0.00730235	0.658032	-0.60377
BW70_15095	A0A026UT22	Pyridoxal phosphate homeostasis protein OS=Escherichia coli O174:H8 str. 04-3038 OX=1446704 GN=BW70_15095 PE=3 SV=1 - [A0A026UT22_ECOLX]	400.072	32.91	49	6	6	17	234	25.8014	6.55127	0.000195302	0.000296865	0.00121156	0.0019153	0.657879	-0.604106
helD	A0A0T5XPT6	DNA helicase OS=Escherichia coli OX=562 GN=helD PE=3 SV=1 - [A0A0T5XPT6_ECOLX]	84.0235	3.36	3	1	2	3	684	77.5496	8.85107	0.000189825	0.000288556	0.00583669	0.00433559	0.657846	-0.604179
AZZ83_000252	A0A243V5M6	Inner membrane transporter YbaT (Fragment) OS=Escherichia coli OX=562 GN=AZZ83_000252 PE=4 SV=1 - [A0A243V5M6_ECOLX]	141.732	6.05	40	2	2	10	397	42.31	8.70459	0.000198356	0.000301561	0.00927277	0.00572728	0.657765	-0.604356
BH694_13825	A0A061YL60	Nicotinamide-nucleotide amidase OS=Escherichia coli OX=562 GN=BH694_13825 PE=3 SV=1 - [A0A061YL60_ECOLX]	163.392	47.88	36	6	6	11	165	17.5698	5.12256	0.000200619	0.00030504	0.015445	0.00781569	0.657682	-0.604539
nadK	A0A080IP12	NAD kinase OS=Escherichia coli 1-250-04_S3_C2 OX=1444163 GN=nadK PE=3 SV=1 - [A0A080IP12_ECOLX]	118.497	26.87	26	4	4	5	268	29.8815	6.34131	0.000208268	0.000316779	0.0266256	0.0108772	0.657455	-0.605036
rlmB	A0A085NX75	23S rRNA (guanosine-2'-O-)-methyltransferase RlmB OS=Escherichia coli OX=562 GN=rlmB PE=3 SV=1 - [A0A085NX75_ECOLX]	313.36	45.27	27	8	8	16	243	26.5538	6.63916	0.000196765	0.000299324	0.0159347	0.00795895	0.657365	-0.605233
psiF	A0A070SUK6	Phosphate starvation-inducible protein psiF OS=Escherichia coli 2-210-07_S3_C3 OX=1444180 GN=psiF PE=4 SV=1 - [A0A070SUK6_ECOLX]	298.467	46.23	34	5	5	15	106	11.709	9.72998	0.000178531	0.000271688	0.00654536	0.00463376	0.657117	-0.605777
Q609_ECAC01972G0001	W1WQV8	Single-stranded DNA-binding protein (Fragment) OS=Escherichia coli DORA_A_5_14_21 OX=1403943 GN=Q609_ECAC01972G0001 PE=3 SV=1 - [W1WQV8_ECOLX]	812.061	52.08	88	2	8	50	144	15.4067	9.08545	0.00019523	0.000297226	0.00304482	0.00312966	0.656839	-0.606388
prfA	A0A080J659	Peptide chain release factor 1 OS=Escherichia coli 1-250-04_S3_C2 OX=1444163 GN=prfA PE=3 SV=1 - [A0A080J659_ECOLX]	163.842	30.56	34	10	10	14	360	40.4502	5.26221	0.000201252	0.000306531	0.000560304	0.00137812	0.656549	-0.607026
hisS	A0A0E2TV58	Histidine--tRNA ligase OS=Escherichia coli O121:H19 str. 2010C-3609 OX=1446560 GN=hisS PE=3 SV=1 - [A0A0E2TV58_ECOLX]	1668.1	60.38	50	19	19	80	424	47.058	5.78271	0.000196319	0.000299118	0.0182103	0.00864057	0.656327	-0.607514
Q609_ECAC02890G0002	W1W3V6	Inner membrane protein yhjD (Fragment) OS=Escherichia coli DORA_A_5_14_21 OX=1403943 GN=Q609_ECAC02890G0002 PE=4 SV=1 - [W1W3V6_ECOLX]	65.8367	16.67	37	4	4	6	198	22.1837	7.50342	0.000197561	0.000301071	0.030288	0.0117998	0.656195	-0.607804
rlmI	L3Q9Y2	Ribosomal RNA large subunit methyltransferase I OS=Escherichia coli KTE75 OX=1182682 GN=rlmI PE=3 SV=1 - [L3Q9Y2_ECOLX]	308.903	30.95	90	11	11	20	391	43.8126	7.72314	0.00019756	0.000301089	0.0332974	0.0125047	0.656152	-0.607899
potA	A0A1X3LWN2	Spermidine/putrescine import ATP-binding protein PotA OS=Escherichia coli TA249 OX=656441 GN=potA PE=3 SV=1 - [A0A1X3LWN2_ECOLX]	85.9354	31.04	30	9	9	13	364	41.3012	5.52881	0.000197986	0.000301808	0.00240281	0.00276353	0.656	-0.608232
C6986_34230	A0A2T1MLJ3	Lipoprotein-releasing ABC transporter ATP-binding protein LolD (Fragment) OS=Escherichia coli OX=562 GN=C6986_34230 PE=4 SV=1 - [A0A2T1MLJ3_ECOLX]	108.86	13.24	36	2	2	4	204	22.1365	8.06006	0.000211768	0.000322826	0.0171309	0.00831536	0.65598	-0.608276
ECW26_07660	I0VX52	HAD-superfamily hydrolase, subfamily IA, variant 1 OS=Escherichia coli W26 OX=1090926 GN=ECW26_07660 PE=4 SV=1 - [I0VX52_ECOLX]	58.28	28.02	39	5	5	8	232	26.2724	6.01123	0.000199248	0.000303768	0.0317969	0.0121565	0.655921	-0.608406
ybgA	A0A0K5WB73	Photoreactivation-associated protein OS=Escherichia coli OX=562 GN=ybgA PE=4 SV=1 - [A0A0K5WB73_ECOLX]	128.564	46.15	67	7	7	10	169	20.1825	9.68604	0.000195463	0.000298103	0.0130485	0.00706652	0.655688	-0.608919
yebR	A0A029IU61	Protein yebR OS=Escherichia coli 2-005-03_S4_C2 OX=1444228 GN=yebR PE=4 SV=1 - [A0A029IU61_ECOLX]	295.808	63.64	57	1	7	17	165	18.0382	4.83057	0.00022099	0.000337041	0.0256376	0.0106127	0.655678	-0.60894
yhiE	H4LIJ0	GadE transcriptional activator OS=Escherichia coli DEC2E OX=868142 GN=yhiE PE=4 SV=1 - [H4LIJ0_ECOLX]	45.1367	20.92	27	4	4	4	153	17.8695	9.18799	0.000196322	0.000299451	0.000323389	0.00106137	0.655606	-0.609099
C6986_28045	A0A2T1MPL0	FCD domain-containing protein (Fragment) OS=Escherichia coli OX=562 GN=C6986_28045 PE=4 SV=1 - [A0A2T1MPL0_ECOLX]	86.4636	18.6	48	3	3	6	242	27.54	5.50342	0.000204292	0.00031162	0.00540135	0.00414138	0.655582	-0.609153
HMPREF9536_05106	D7XVI2	ABC transporter, ATP-binding protein OS=Escherichia coli MS 84-1 OX=749533 GN=HMPREF9536_05106 PE=4 SV=1 - [D7XVI2_ECOLX]	722.745	41.95	45	20	20	38	522	59.0469	5.05908	0.000197979	0.000302048	0.0129875	0.00704607	0.655454	-0.609433
solA	B7MIK0	N-methyl-L-tryptophan oxidase OS=Escherichia coli O45:K1 (strain S88 / ExPEC) OX=585035 GN=solA PE=3 SV=1 - [MTOX_ECO45]	194.798	30.38	84	10	10	19	372	40.8903	5.36377	0.000199062	0.000303761	0.0198778	0.00911524	0.655325	-0.609717
pgk	I0VUN7	Phosphoglycerate kinase OS=Escherichia coli W26 OX=1090926 GN=pgk PE=3 SV=1 - [I0VUN7_ECOLX]	9743.3	86.65	17	25	25	306	382	40.5343	5.16064	0.000197434	0.000301376	0.0489783	0.0156184	0.655108	-0.610195
tsaD	A0A029IKH4	tRNA N6-adenosine threonylcarbamoyltransferase OS=Escherichia coli 2-005-03_S4_C2 OX=1444228 GN=tsaD PE=3 SV=1 - [A0A029IKH4_ECOLX]	260.071	27.6	37	9	9	16	337	36.0585	6.11279	0.000196455	0.000299926	0.0263066	0.0107925	0.655014	-0.610403
APX71_04755	A0A2T8FXF3	Uncharacterized protein OS=Escherichia coli OX=562 GN=APX71_04755 PE=4 SV=1 - [A0A2T8FXF3_ECOLX]	147.887	37.26	65	5	5	8	212	23.519	5.38916	0.000200547	0.00030618	0.0424487	0.0143872	0.654995	-0.610445
BIQ87_10660	A0A0J2BG57	Metalloprotein OS=Escherichia coli OX=562 GN=BIQ87_10660 PE=4 SV=1 - [A0A0J2BG57_ECOLX]	155.377	29.79	24	1	4	8	188	21.1798	5.52881	0.000200107	0.000305528	0.00453979	0.00377102	0.654955	-0.610533
dnaX	J7QY15	DNA polymerase III subunit gamma/tau OS=Escherichia coli OX=562 GN=dnaX PE=3 SV=1 - [J7QY15_ECOLX]	225.402	17.95	89	11	11	16	635	70.198	6.96143	0.000198063	0.000302505	0.0361714	0.0131382	0.654743	-0.610999
glnE	A0A061KHQ5	Bifunctional glutamine synthetase adenylyltransferase/adenylyl-removing enzyme OS=Escherichia coli OX=562 GN=glnE PE=3 SV=1 - [A0A061KHQ5_ECOLX]	256.918	15.12	158	9	9	14	946	108.246	5.23682	0.00019798	0.000302401	0.00319911	0.00320657	0.654694	-0.611108
frr	A0A0U3TQE8	Ribosome-recycling factor OS=Escherichia coli OX=562 GN=frr PE=3 SV=1 - [A0A0U3TQE8_ECOLX]	1618.21	63.58	9	15	15	74	173	19.2121	6.85889	0.000197914	0.000302326	0.0208084	0.00936652	0.654638	-0.611231
obg	Q1R6F4	GTPase Obg OS=Escherichia coli (strain UTI89 / UPEC) OX=364106 GN=obg PE=3 SV=1 - [OBG_ECOUT]	877.508	34.2	17	2	12	48	386	42.6975	4.95752	0.000194578	0.000297303	0.00853104	0.00544089	0.654476	-0.611587
rplN	A0A0T5XJ40	50S ribosomal protein L14 OS=Escherichia coli OX=562 GN=rplN PE=3 SV=1 - [A0A0T5XJ40_ECOLX]	2095.73	45.53	9	5	5	67	123	13.5465	10.4185	0.000198894	0.000304018	0.0119606	0.00670948	0.654219	-0.612154
engB	L2VF71	Probable GTP-binding protein EngB OS=Escherichia coli KTE10 OX=1169330 GN=engB PE=3 SV=1 - [L2VF71_ECOLX]	563.363	26.67	6	3	6	17	210	23.5722	8.30908	0.000199516	0.000305001	0.0202139	0.00920707	0.654148	-0.612312
yceG	A0A0H2V6C3	Endolytic murein transglycosylase OS=Escherichia coli O6:H1 (strain CFT073 / ATCC 700928 / UPEC) OX=199310 GN=yceG PE=3 SV=1 - [A0A0H2V6C3_ECOL6]	42.2655	9.67	45	3	3	3	269	30.2855	8.82178	0.000196352	0.000300212	0.0137627	0.00730056	0.654046	-0.612536
ERYG_01983	A0A0K9TC49	Nicotinate-nucleotide adenylyltransferase (Fragment) OS=Escherichia coli M114 OX=656416 GN=ERYG_01983 PE=4 SV=1 - [A0A0K9TC49_ECOLX]	68.46	7.75	23	1	1	1	142	16.6553	4.79248	0.00018568	0.000284032	0.0441718	0.0147219	0.653728	-0.613237
malP_2	A0A0A1ADS9	Alpha-1,4 glucan phosphorylase OS=Escherichia coli OX=562 GN=malP_2 PE=3 SV=1 - [A0A0A1ADS9_ECOLX]	786.052	35.71	48	25	25	51	815	93.1571	5.96045	0.000198331	0.000303417	0.0406097	0.0140389	0.653657	-0.613394
B2H83_12320	A0A1S6TCL1	Uncharacterized protein OS=Escherichia coli M8 OX=1392854 GN=B2H83_12320 PE=4 SV=1 - [A0A1S6TCL1_ECOLX]	207.776	19.02	48	5	5	9	305	32.098	8.55811	0.000204441	0.000312829	0.00476187	0.00386439	0.653521	-0.613694
ECs3153	A0A0H3JMC1	Isochorismate hydroxymutase 2 OS=Escherichia coli O157:H7 OX=83334 GN=ECs3153 PE=4 SV=1 - [A0A0H3JMC1_ECO57]	102.136	12.64	93	4	4	5	356	40.3007	7.82568	0.000196633	0.000300894	0.00162307	0.0022506	0.653494	-0.613753
ybfF	A0A029J0E7	Esterase ybfF OS=Escherichia coli 2-005-03_S4_C2 OX=1444228 GN=ybfF PE=4 SV=1 - [A0A029J0E7_ECOLX]	142.909	29.92	9	6	6	11	254	28.4706	6.46826	0.000197387	0.000302077	0.0127374	0.00696306	0.653433	-0.613889
AKN41_4555	A0A222BBU2	Transcriptional repressor UlaR OS=Escherichia coli OX=562 GN=AKN41_4555 PE=4 SV=1 - [A0A222BBU2_ECOLX]	134.38	23.85	28	5	5	9	239	26.1346	8.70459	0.00019776	0.000302747	0.00711592	0.00486019	0.65322	-0.61436
EAXG_00932	A0A1X3LJ08	Phenazine biosynthesis protein PhzF family protein OS=Escherichia coli TA054 OX=656433 GN=EAXG_00932 PE=4 SV=1 - [A0A1X3LJ08_ECOLX]	17.65	7.74	2	1	1	1	297	32.2575	6.52197	0.000217849	0.000333515	0.00738985	0.00496563	0.653191	-0.614423
pykA	B7MBR3	Pyruvate kinase OS=Escherichia coli O45:K1 (strain S88 / ExPEC) OX=585035 GN=pykA PE=3 SV=1 - [B7MBR3_ECO45]	4746.58	77.71	26	1	26	183	480	51.3387	6.68311	0.000228095	0.000349206	0.018432	0.00870557	0.653181	-0.614444
rsmI	A0A069XTN4	Ribosomal RNA small subunit methyltransferase I OS=Escherichia coli 3-373-03_S4_C2 OX=1444252 GN=rsmI PE=3 SV=1 - [A0A069XTN4_ECOLX]	166.421	28.32	54	6	6	9	286	31.2865	6.23975	0.000200386	0.000306888	0.00309473	0.00315497	0.652963	-0.614927
BH694_04810	A0A061L895	GntR family transcriptional regulator OS=Escherichia coli OX=562 GN=BH694_04810 PE=4 SV=1 - [A0A061L895_ECOLX]	31.65	15.73	28	4	4	4	248	28.2617	6.65381	0.000202955	0.000310899	0.0359853	0.0130985	0.652801	-0.615284
HMPREF1595_00108	V0SUV7	MOSC domain protein OS=Escherichia coli 907672 OX=1268982 GN=HMPREF1595_00108 PE=4 SV=1 - [V0SUV7_ECOLX]	244.786	30.99	108	9	9	14	355	38.9737	6.771	0.000196998	0.000301815	0.00538251	0.00413269	0.652709	-0.615488
ECW26_29160	I0VQX2	Putative lipoprotein OS=Escherichia coli W26 OX=1090926 GN=ECW26_29160 PE=4 SV=1 - [I0VQX2_ECOLX]	42.44	13.64	68	5	5	5	352	39.0511	9.51025	0.000194427	0.000297988	0.000536647	0.00135269	0.652467	-0.616023
bcp	A0A023Z0U5	Thiol peroxidase, Bcp-type OS=Escherichia coli O145:H28 str. RM12581 OX=1248823 GN=bcp PE=4 SV=1 - [A0A023Z0U5_ECOLX]	652.806	66.67	12	11	11	45	156	17.6077	5.23682	0.000194355	0.000297918	0.016727	0.00819728	0.652378	-0.61622
glnS	A0A1X3M1S0	Glutamine--tRNA ligase OS=Escherichia coli TA249 OX=656441 GN=glnS PE=3 SV=1 - [A0A1X3M1S0_ECOLX]	1107.5	46.11	15	2	23	69	553	63.3218	6.45557	0.000206116	0.000315975	0.0016052	0.00223737	0.652317	-0.616354
sspA	A0A0K3RLL4	Stringent starvation protein A OS=Escherichia coli OX=562 GN=sspA PE=3 SV=1 - [A0A0K3RLL4_ECOLX]	2204.99	62.26	10	11	11	92	212	24.2715	5.33838	0.00019828	0.000303969	0.0424007	0.0143783	0.652303	-0.616386
B1K96_02345	A0A0D7FZA6	DNA-binding response regulator OS=Escherichia coli OX=562 GN=B1K96_02345 PE=4 SV=1 - [A0A0D7FZA6_ECOLX]	45.43	8.07	52	2	2	2	223	24.9792	6.0874	0.000204771	0.000313967	0.0278843	0.0112042	0.652207	-0.616598
gntR	A0A024KR73	Regulator of gluconate operon OS=Escherichia coli D6-113.11 OX=1400022 GN=gntR PE=4 SV=1 - [A0A024KR73_ECOLX]	314.338	25.32	46	6	6	14	312	34.2626	6.23975	0.000201823	0.000309453	0.0149281	0.00766254	0.652193	-0.61663
selA	A0A069XKC3	L-seryl-tRNA(Sec) selenium transferase OS=Escherichia coli 3-373-03_S4_C2 OX=1444252 GN=selA PE=3 SV=1 - [A0A069XKC3_ECOLX]	435.805	37.58	77	14	14	27	463	50.5295	6.48096	0.000197334	0.000302753	0.00949297	0.00580885	0.651799	-0.6175
fusA	A0A2A7M9H6	Elongation factor G OS=Escherichia coli OX=562 GN=fusA PE=3 SV=1 - [A0A2A7M9H6_ECOLX]	13551.4	75.71	25	35	38	564	704	77.5065	5.37646	0.00019501	0.000299295	0.00877143	0.00553573	0.651565	-0.618019
AOX65_17590	A0A0T5XRR9	Serine/threonine protein kinase OS=Escherichia coli OX=562 GN=AOX65_17590 PE=4 SV=1 - [A0A0T5XRR9_ECOLX]	1653.05	40.68	7	1	26	89	644	74.3846	5.97314	0.000192207	0.000295031	0.000606551	0.00142443	0.65148	-0.618207
EADG_01127	A0A1X3IMW8	MltA-interacting protein OS=Escherichia coli E1114 OX=550691 GN=EADG_01127 PE=4 SV=1 - [A0A1X3IMW8_ECOLX]	673.101	20.59	26	4	4	21	238	26.7768	5.40186	0.000186144	0.000285754	0.033206	0.0124838	0.651414	-0.618354
APT94_07005	A0A0V9MR63	Uncharacterized protein OS=Escherichia coli OX=562 GN=APT94_07005 PE=4 SV=1 - [A0A0V9MR63_ECOLX]	145.149	9.27	42	4	4	8	518	56.5481	5.021	0.000190899	0.000293081	0.010195	0.00608072	0.651354	-0.618486
fucI	A0A2T1MV34	L-fucose isomerase OS=Escherichia coli OX=562 GN=fucI PE=4 SV=1 - [A0A2T1MV34_ECOLX]	88.5967	9.44	68	6	6	9	572	62.7766	5.5542	0.000203144	0.000312166	0.00266158	0.00292054	0.650758	-0.619806
yqfB	A0A066R824	UPF0267 protein YqfB OS=Escherichia coli OX=562 GN=yqfB PE=3 SV=1 - [A0A066R824_ECOLX]	175.895	40.78	41	5	5	13	103	11.953	4.94482	0.000195209	0.000299981	0.00363269	0.00340356	0.65074	-0.619847
BX06_15140	A0A028ACZ1	Uncharacterized protein OS=Escherichia coli O69:H11 str. 08-4661 OX=1446753 GN=BX06_15140 PE=3 SV=1 - [A0A028ACZ1_ECOLX]	728.13	65.53	28	9	9	46	206	23.224	6.78564	0.000195389	0.000300302	0.00126564	0.0019585	0.650641	-0.620066
srmB	Q8XA21	ATP-dependent RNA helicase SrmB OS=Escherichia coli O157:H7 OX=83334 GN=srmB PE=3 SV=2 - [Q8XA21_ECO57]	1032.55	46.85	33	17	17	69	444	49.8644	9.24658	0.000197892	0.000304218	0.0433858	0.0145704	0.650494	-0.620393
BX52_23445	A0A0E2TU37	dITP/XTP pyrophosphatase OS=Escherichia coli O121:H19 str. 2010C-3609 OX=1446560 GN=BX52_23445 PE=3 SV=1 - [A0A0E2TU37_ECOLX]	200.388	38.58	39	4	5	13	197	20.9369	5.84619	0.00019993	0.000307368	0.0162038	0.0080409	0.650457	-0.620474
BIZ41_19030	A0A271QSN5	Molecular chaperone OS=Escherichia coli OX=562 GN=BIZ41_19030 PE=3 SV=1 - [A0A271QSN5_ECOLX]	2262.47	47.83	8	2	6	87	161	17.6763	9.80322	0.000197455	0.000303582	0.0402296	0.0139652	0.650416	-0.620566
ERS085379_01102	A0A0F3SYQ9	Putative permease OS=Escherichia coli OX=562 GN=ERS085379_01102 PE=4 SV=1 - [A0A0F3SYQ9_ECOLX]	48.67	8.58	133	5	5	5	804	89.2449	9.30518	0.00018919	0.000290924	0.00422793	0.00363557	0.650308	-0.620805
iadA	A0A0V9NA34	Isoaspartyl dipeptidase OS=Escherichia coli OX=562 GN=iadA PE=3 SV=1 - [A0A0V9NA34_ECOLX]	388.294	45.38	9	1	12	22	390	41.0312	5.19873	0.000195834	0.000301147	0.000232032	0.000885881	0.650296	-0.620831
yebT	A0A0E1LCI3	Membrane protein YebT OS=Escherichia coli OX=562 GN=yebT PE=4 SV=1 - [A0A0E1LCI3_ECOLX]	131.378	17.14	109	12	12	13	846	91.3429	5.88428	0.000197167	0.0003032	0.00415336	0.00360862	0.650289	-0.620847
yciN	A0A0K4UYE1	Protein OS=Escherichia coli OX=562 GN=yciN PE=4 SV=1 - [A0A0K4UYE1_ECOLX]	447.977	67.47	12	4	4	24	83	9.37886	6.52197	0.000195206	0.000300217	0.0441921	0.0147257	0.650216	-0.621009
ispG	B1LNH0	4-hydroxy-3-methylbut-2-en-1-yl diphosphate synthase (flavodoxin) OS=Escherichia coli (strain SMS-3-5 / SECEC) OX=439855 GN=ispG PE=3 SV=1 - [ISPG_ECOSM]	1256.07	73.12	22	24	24	74	372	40.6724	6.21436	0.000197046	0.000303099	0.00120571	0.00191068	0.650105	-0.621255
lepA	A0A061YLN5	Elongation factor 4 OS=Escherichia coli OX=562 GN=lepA PE=3 SV=1 - [A0A061YLN5_ECOLX]	900.837	33.22	32	16	16	44	599	66.4844	5.66846	0.000196178	0.000301792	0.00465966	0.00382196	0.650044	-0.621391
ychJ	A0A0D8WF30	UPF0225 protein YchJ OS=Escherichia coli OX=562 GN=ychJ PE=3 SV=1 - [A0A0D8WF30_ECOLX]	48.61	17.76	84	2	3	4	152	17.0051	7.54736	0.000192668	0.000296417	0.00175324	0.00234296	0.64999	-0.62151
C6985_04800	A0A2T1LP74	Thioredoxin-disulfide reductase OS=Escherichia coli OX=562 GN=C6985_04800 PE=4 SV=1 - [A0A2T1LP74_ECOLX]	660.988	35.09	2	1	6	28	322	34.5953	5.73193	0.000195047	0.000300179	0.0339892	0.012661	0.649768	-0.622003
guaA	V8KG92	GMP synthase [glutamine-hydrolyzing] OS=Escherichia coli LAU-EC10 OX=1417796 GN=guaA PE=3 SV=1 - [V8KG92_ECOLX]	2043.19	59.24	4	12	25	91	525	58.6579	5.38916	0.000197156	0.000303427	0.0340577	0.0126764	0.649763	-0.622014
ECMP0215612_3494	M9G9D0	Efflux pump membrane family protein OS=Escherichia coli MP021561.2 OX=1116136 GN=ECMP0215612_3494 PE=4 SV=1 - [M9G9D0_ECOLX]	94.9439	20.38	43	7	7	8	319	34.7883	9.20264	0.000204245	0.000314958	9.48524e-05	0.00054581	0.648481	-0.624864
BH694_04895	A0A066T480	Histidine kinase OS=Escherichia coli OX=562 GN=BH694_04895 PE=4 SV=1 - [A0A066T480_ECOLX]	36.3577	11.78	55	5	5	7	467	52.0801	7.12256	0.000192601	0.000297004	0.0119652	0.00671103	0.648479	-0.624868
A1WS_04223	S1IF45	Outer membrane protein slp OS=Escherichia coli KTE107 OX=1182703 GN=A1WS_04223 PE=4 SV=1 - [S1IF45_ECOLX]	3577.83	59.57	7	2	7	213	188	20.9348	8.104	0.000197606	0.000304725	0.000461179	0.00126241	0.648476	-0.624876
Q609_ECAC00141G0001	W1XCZ8	2-amino-4-hydroxy-6-hydroxymethyldihydropteridin (Fragment) OS=Escherichia coli DORA_A_5_14_21 OX=1403943 GN=Q609_ECAC00141G0001 PE=4 SV=1 - [W1XCZ8_ECOLX]	23.41	13.74	16	2	2	4	131	14.7376	5.22412	0.000201963	0.000311478	0.00601994	0.00441376	0.6484	-0.625044
ydjF	A0A2D0P746	DNA-binding transcriptional regulator OS=Escherichia coli O127:H6 OX=168807 GN=ydjF PE=4 SV=1 - [A0A2D0P746_ECOLX]	139.684	30	25	6	6	9	240	26.8789	5.89697	0.000193791	0.000298878	0.00477868	0.00387128	0.648393	-0.625059
BSR05_13185	A0A167B3X4	Osmotically-inducible lipoprotein OsmB OS=Escherichia coli OX=562 GN=BSR05_13185 PE=4 SV=1 - [A0A167B3X4_ECOLX]	321.67	61.54	6	1	1	8	65	6.12218	9.14404	0.000201688	0.000311075	0.015035	0.00769458	0.648358	-0.625138
ECBD_0385	A0A140N4Y2	Peptidyl-prolyl cis-trans isomerase OS=Escherichia coli (strain B / BL21-DE3) OX=469008 GN=ECBD_0385 PE=3 SV=1 - [A0A140N4Y2_ECOBD]	1476.66	80.53	5	7	11	62	190	20.4174	9.14404	0.000192073	0.000296341	0.0292328	0.0115429	0.648149	-0.625603
thpR	A0A025CLI6	RNA 2',3'-cyclic phosphodiesterase OS=Escherichia coli O145:NM str. 2010C-3526 OX=1446596 GN=thpR PE=3 SV=1 - [A0A025CLI6_ECOLX]	21.97	4.55	54	1	1	1	176	20.0015	10.4771	0.00020474	0.000315919	0.00147306	0.00213515	0.648076	-0.625764
rpoB	A0A0B5HLZ9	DNA-directed RNA polymerase subunit beta OS=Escherichia coli OX=562 GN=rpoB PE=3 SV=1 - [A0A0B5HLZ9_ECOLX]	11535.8	66.62	58	75	75	454	1342	150.48	5.2749	0.000193731	0.00029902	0.00936905	0.00576313	0.647886	-0.626187
ECCG_01076	D6HWU8	Anti-RNA polymerase sigma factor SigE OS=Escherichia coli B088 OX=550672 GN=ECCG_01076 PE=4 SV=1 - [D6HWU8_ECOLX]	77.2927	46.55	31	2	5	7	174	19.3947	6.15088	0.000186989	0.000288619	0.018612	0.00875791	0.647873	-0.626216
tsf	E3PDC2	Elongation factor Ts OS=Escherichia coli O78:H11 (strain H10407 / ETEC) OX=316401 GN=tsf PE=3 SV=1 - [E3PDC2_ECOH1]	7714.63	78.8	3	9	22	326	283	30.3938	5.2876	0.000196686	0.000303602	0.0405353	0.0140245	0.647841	-0.626289
hflB	A0A192ETR1	ATP-dependent zinc metalloprotease FtsH OS=Escherichia coli OX=562 GN=hflB PE=3 SV=1 - [A0A192ETR1_ECOLX]	2202.92	59.32	33	34	34	120	644	70.6624	6.37939	0.000193018	0.000298146	0.0144299	0.00751071	0.647394	-0.627283
pth	A0A0K4HK15	Peptidyl-tRNA hydrolase OS=Escherichia coli OX=562 GN=pth PE=3 SV=1 - [A0A0K4HK15_ECOLX]	365.435	55.15	35	8	8	22	194	21.0831	8.99756	0.000199537	0.000308401	0.00185965	0.00241364	0.647007	-0.628146
gppA	B1B6T2	Guanosine-5'-triphosphate,3'-diphosphate pyrophosphatase (Fragment) OS=Escherichia coli OX=562 GN=gppA PE=3 SV=1 - [B1B6T2_ECOLX]	133.17	13.17	80	5	5	6	486	54.0083	6.41748	0.000196241	0.000303497	0.0476968	0.0153864	0.6466	-0.629054
APU18_20280	A0A0J8XDV5	Acetate operon repressor OS=Escherichia coli OX=562 GN=APU18_20280 PE=4 SV=1 - [A0A0J8XDV5_ECOLX]	117.46	18.61	41	5	5	7	274	29.7025	8.01611	0.000195777	0.000302954	0.000781836	0.00157244	0.646227	-0.629888
pcnB	A0A0P7QJS0	Poly(A) polymerase I OS=Escherichia coli OX=562 GN=pcnB PE=3 SV=1 - [A0A0P7QJS0_ECOLX]	104.813	24.67	5	11	11	19	454	52.5144	9.59814	0.000197186	0.000305182	0.0274887	0.0111026	0.646127	-0.630111
C2M16_13390	A0A2K3TS85	PrkA family serine protein kinase OS=Escherichia coli OX=562 GN=C2M16_13390 PE=4 SV=1 - [A0A2K3TS85_ECOLX]	2019.55	53.73	10	1	31	115	644	74.4326	5.93506	0.00019731	0.000305428	0.0210365	0.00942672	0.646012	-0.630368
rfaD	A0A073UJ92	ADP-L-glycero-D-manno-heptose-6-epimerase OS=Escherichia coli 5-366-08_S1_C1 OX=1444047 GN=rfaD PE=3 SV=1 - [A0A073UJ92_ECOLX]	2194.7	65.48	31	17	17	102	310	34.7841	4.84326	0.000194602	0.000301314	0.0162971	0.00806907	0.645845	-0.63074
EAXG_00793	A0A1X3LIV0	Peptide transport periplasmic protein SapA OS=Escherichia coli TA054 OX=656433 GN=EAXG_00793 PE=4 SV=1 - [A0A1X3LIV0_ECOLX]	89.3765	20.51	68	8	8	8	468	53.0621	7.92822	0.000192983	0.000298931	0.00392781	0.00352357	0.645577	-0.63134
BXT93_21660	A0A1V2G987	Cardiolipin synthase A (Fragment) OS=Escherichia coli OX=562 GN=BXT93_21660 PE=3 SV=1 - [A0A1V2G987_ECOLX]	208.167	18.75	28	7	7	14	448	50.4981	7.28369	0.000189396	0.000293419	0.0444561	0.0147761	0.645479	-0.631557
nagA	A0A061KPP8	N-acetylglucosamine-6-phosphate deacetylase OS=Escherichia coli OX=562 GN=nagA PE=3 SV=1 - [A0A061KPP8_ECOLX]	1027.05	57.85	42	16	16	58	382	40.9511	5.97314	0.000190162	0.000294626	0.00186957	0.00242002	0.645435	-0.631655
AD31_5530	A0A073FBF7	Oligoribonuclease (Fragment) OS=Escherichia coli 2-427-07_S4_C3 OX=1444266 GN=AD31_5530 PE=3 SV=1 - [A0A073FBF7_ECOLX]	436.607	42.69	33	7	7	29	171	19.63	5.17334	0.000193541	0.000299879	0.00177217	0.00235584	0.645397	-0.631741
rpmC	A0A0K4VLW7	50S ribosomal protein L29 OS=Escherichia coli OX=562 GN=rpmC PE=3 SV=1 - [A0A0K4VLW7_ECOLX]	982.99	46.03	4	2	2	29	63	7.25599	9.99365	0.000197077	0.000305424	0.0419333	0.014291	0.645259	-0.632051
uxuB	A0A024L899	D-mannonate oxidoreductase OS=Escherichia coli OX=562 GN=uxuB PE=3 SV=1 - [A0A024L899_ECOLX]	245.875	25.93	185	11	12	17	486	53.5459	5.51611	0.000193643	0.000300112	0.00947439	0.00580203	0.645235	-0.632104
mreC	A0A0B5HQC7	MreC OS=Escherichia coli OX=562 GN=mreC PE=4 SV=1 - [A0A0B5HQC7_ECOLX]	108.762	20.11	36	6	6	6	358	38.7204	8.41162	0.00019716	0.000305676	0.00796211	0.00520825	0.644996	-0.632637
rbfA	A0A0K4I2A1	Ribosome-binding factor A OS=Escherichia coli OX=562 GN=rbfA PE=3 SV=1 - [A0A0K4I2A1_ECOLX]	347.538	78.95	13	11	11	25	133	15.1448	6.20166	0.000192927	0.000299155	0.0166581	0.00817691	0.644908	-0.632836
ECO9455_04270	K4WWR2	Uncharacterized protein (Fragment) OS=Escherichia coli O111:H11 str. CVM9455 OX=1165939 GN=ECO9455_04270 PE=4 SV=1 - [K4WWR2_ECOLX]	104.52	21.77	15	2	2	5	147	16.1338	9.20264	0.000199061	0.000308821	0.0230225	0.00993622	0.644584	-0.633559
flu	I2R8M8	Antigen 43 OS=Escherichia coli 1.2741 OX=869669 GN=flu PE=4 SV=1 - [I2R8M8_ECOLX]	748.46	26.77	29	1	17	37	949	97.5752	6.12549	0.00020215	0.000313629	0.021532	0.00955563	0.644552	-0.633632
BET08_29445	A0A1V2STE9	Cytochrome-c peroxidase (Fragment) OS=Escherichia coli OX=562 GN=BET08_29445 PE=4 SV=1 - [A0A1V2STE9_ECOLX]	20.09	12.06	61	5	5	6	431	47.7841	5.88428	0.000203283	0.00031544	0.000941789	0.00170904	0.644442	-0.633877
C5P43_27920	A0A2S7HLK9	Iron-sulfur cluster-binding protein (Fragment) OS=Escherichia coli OX=562 GN=C5P43_27920 PE=4 SV=1 - [A0A2S7HLK9_ECOLX]	44.4	7.57	68	3	3	4	383	42.5847	7.29834	0.000208476	0.0003235	0.0401924	0.013958	0.64444	-0.633883
nlpD	A0A0L6ZX38	Lipoprotein NlpD OS=Escherichia coli OX=562 GN=nlpD PE=4 SV=1 - [A0A0L6ZX38_ECOLX]	189.097	25.07	61	6	6	15	379	40.0853	9.51025	0.000185835	0.000288494	0.00289015	0.00304853	0.644157	-0.634516
ypjD	H4UMP9	Inner membrane protein ypjD OS=Escherichia coli DEC6A OX=868160 GN=ypjD PE=4 SV=1 - [H4UMP9_ECOLX]	33.93	8.15	20	1	1	1	184	21.0233	9.27588	0.00018123	0.000281369	0.0133359	0.00716187	0.644102	-0.634639
BW70_21995	A0A026UK52	Semialdehyde dehydrogenase OS=Escherichia coli O174:H8 str. 04-3038 OX=1446704 GN=BW70_21995 PE=3 SV=1 - [A0A026UK52_ECOLX]	732.234	39.76	46	10	10	34	337	36.2024	4.4624	0.000195188	0.000303143	0.00939689	0.00577344	0.643881	-0.635134
BB545_03810	A0A2A3WXI5	Glutamate decarboxylase (Fragment) OS=Escherichia coli OX=562 GN=BB545_03810 PE=3 SV=1 - [A0A2A3WXI5_ECOLX]	8688.91	88.57	2	1	12	356	140	15.8717	5.16064	0.000196637	0.000305396	0.00382778	0.00348405	0.643875	-0.635146
folP	A0A0D0LTF4	Dihydropteroate synthase OS=Escherichia coli OX=562 GN=folP PE=3 SV=1 - [A0A0D0LTF4_ECOLX]	194.324	26.62	50	3	7	23	278	30.0194	5.87158	0.000199386	0.000309789	0.00297478	0.00309345	0.643618	-0.635723
yajG	A0A024L620	Predicted lipoprotein OS=Escherichia coli OX=562 GN=yajG PE=4 SV=1 - [A0A024L620_ECOLX]	669.359	28.65	23	5	5	36	192	20.9509	8.63135	0.000194372	0.000302017	0.0493886	0.0156916	0.643579	-0.63581
eno	W1ESM7	Enolase OS=Escherichia coli ISC7 OX=1432555 GN=eno PE=3 SV=1 - [W1ESM7_ECOLX]	16430.2	77.88	14	23	23	633	425	44.872	5.37646	0.000190931	0.000296676	0.011104	0.00641406	0.643567	-0.635837
G925_03589	A0A0E2KZN8	Nitrite reductase [NAD(P)H] large subunit OS=Escherichia coli (strain UMEA 3162-1) OX=1281200 GN=G925_03589 PE=3 SV=1 - [A0A0E2KZN8_ECOU3]	209.447	22.08	9	1	17	23	847	93.0472	6.21436	0.000187412	0.000291347	0.00125552	0.00195049	0.64326	-0.636525
pyrG	A0A0K6BJ70	CTP synthase OS=Escherichia coli OX=562 GN=pyrG PE=3 SV=1 - [A0A0K6BJ70_ECOLX]	1581.85	55.6	20	26	27	98	545	60.3371	5.84619	0.00019387	0.000301425	0.0492826	0.0156727	0.643179	-0.636707
G938_00500	T9A8S9	Peptidylprolyl isomerase OS=Escherichia coli UMEA 3200-1 OX=1281213 GN=G938_00500 PE=4 SV=1 - [T9A8S9_ECOLX]	2321.87	61.16	6	1	31	105	623	68.0797	5.07178	0.000209159	0.000325222	0.0133377	0.00716245	0.643127	-0.636823
BX06_09155	A0A028AJ71	Uncharacterized protein OS=Escherichia coli O69:H11 str. 08-4661 OX=1446753 GN=BX06_09155 PE=4 SV=1 - [A0A028AJ71_ECOLX]	161.628	13.14	82	1	7	10	586	65.5831	4.50049	0.000193759	0.000301287	0.0373374	0.0133836	0.643104	-0.636876
dnaT	A0A073FLN9	Primosomal protein 1 OS=Escherichia coli 2-427-07_S4_C3 OX=1444266 GN=dnaT PE=3 SV=1 - [A0A073FLN9_ECOLX]	82.6816	18.97	43	3	3	7	174	18.9007	5.16064	0.000195819	0.000304493	0.000153609	0.000704739	0.643098	-0.63689
WM48_05085	A0A192EZL4	Phosphoanhydride phosphorylase OS=Escherichia coli OX=562 GN=WM48_05085 PE=4 SV=1 - [A0A192EZL4_ECOLX]	437.722	32.11	139	11	11	23	436	47.4755	6.78564	0.000194273	0.000302218	0.00442295	0.0037201	0.642825	-0.637503
Q610_ECBC00372G0001	W1UZY5	Uncharacterized protein (Fragment) OS=Escherichia coli DORA_B_14 OX=1403944 GN=Q610_ECBC00372G0001 PE=4 SV=1 - [W1UZY5_ECOLX]	135.419	31.61	53	5	5	6	193	21.9725	9.39307	0.000193905	0.000301687	0.00153749	0.00218599	0.642735	-0.637704
Q609_ECAC00616G0001	W1X8V8	tRNA (Guanosine(18)-2'-O)-methyltransferase (Fragment) OS=Escherichia coli DORA_A_5_14_21 OX=1403943 GN=Q609_ECAC00616G0001 PE=3 SV=1 - [W1X8V8_ECOLX]	66.2	23.81	34	4	4	6	210	23.0246	6.72705	0.000193751	0.000301624	0.000684709	0.00149387	0.64236	-0.638545
rluD	A0A066T1F5	Pseudouridine synthase OS=Escherichia coli OX=562 GN=rluD PE=3 SV=1 - [A0A066T1F5_ECOLX]	306.98	32.52	43	8	8	20	326	37.1142	6.7124	0.000193032	0.000300669	2.33254e-05	0.000233548	0.642007	-0.639339
engB	A0A0Q2Y8Y0	Probable GTP-binding protein EngB OS=Escherichia coli OX=562 GN=engB PE=3 SV=1 - [A0A0Q2Y8Y0_ECOLX]	400.357	26.19	5	2	4	11	210	23.5262	7.56201	0.00019162	0.000298479	0.0119806	0.00671621	0.641988	-0.639382
prmB	A0A067HDY1	50S ribosomal protein L3 glutamine methyltransferase OS=Escherichia coli OX=562 GN=prmB PE=3 SV=1 - [A0A067HDY1_ECOLX]	326.128	32.26	16	2	8	22	310	35.0215	4.76709	0.000199138	0.000310229	0.00409533	0.00358725	0.641906	-0.639566
murA	G0F2I6	UDP-N-acetylglucosamine 1-carboxyvinyltransferase OS=Escherichia coli UMNF18 OX=1050617 GN=murA PE=3 SV=1 - [G0F2I6_ECOLX]	430.131	37.71	29	15	15	30	419	44.7755	6.16357	0.000193189	0.000300962	0.0362297	0.0131506	0.641904	-0.639571
APU18_08050	A0A0V9S406	Non-ribosomal peptide synthetase OS=Escherichia coli OX=562 GN=APU18_08050 PE=4 SV=1 - [A0A0V9S406_ECOLX]	39.7	2.94	4	3	4	6	1598	176.642	6.22705	0.000192239	0.000299647	0.000384288	0.00115332	0.641552	-0.640361
Q609_ECAC00011G0001	W1XEP9	Haloacid dehalogenase-like protein hydrolase family protein (Fragment) OS=Escherichia coli DORA_A_5_14_21 OX=1403943 GN=Q609_ECAC00011G0001 PE=4 SV=1 - [W1XEP9_ECOLX]	280.557	41.91	2	1	5	13	136	14.9798	4.70361	0.000195113	0.000304132	0.0084191	0.00539604	0.641541	-0.640387
prfC	A0A028DMW2	Peptide chain release factor 3 OS=Escherichia coli O118:H16 str. 2009C-4446 OX=1446549 GN=prfC PE=3 SV=1 - [A0A028DMW2_ECOLX]	359.238	29.11	56	15	15	36	529	59.5093	5.87158	0.000197093	0.000307341	0.0346982	0.0128187	0.641284	-0.640965
speD	A0A0K5PEK1	S-adenosylmethionine decarboxylase proenzyme OS=Escherichia coli OX=562 GN=speD PE=3 SV=1 - [A0A0K5PEK1_ECOLX]	121.043	18.94	21	4	4	11	264	30.3641	5.60498	0.000199454	0.000311099	0.00453258	0.00376791	0.641126	-0.64132
BET08_15270	A0A1V2SSJ5	Uncharacterized protein (Fragment) OS=Escherichia coli OX=562 GN=BET08_15270 PE=4 SV=1 - [A0A1V2SSJ5_ECOLX]	75.1494	22.52	70	2	2	4	111	11.579	5.38916	0.000192221	0.000299856	0.00151139	0.00216563	0.641045	-0.641503
AB67_1847	A0A073HE74	Uncharacterized protein OS=Escherichia coli 5-366-08_S1_C3 OX=1444102 GN=AB67_1847 PE=4 SV=1 - [A0A073HE74_ECOLX]	421.252	40.75	13	10	10	29	346	38.2317	5.92236	0.000193929	0.000302537	0.00657193	0.00464467	0.641007	-0.641587
gshB	A0A029IKN5	Glutathione synthetase OS=Escherichia coli 2-005-03_S4_C2 OX=1444228 GN=gshB PE=3 SV=1 - [A0A029IKN5_ECOLX]	801.575	46.2	38	11	11	45	316	35.5323	5.22412	0.000193744	0.000302288	0.0466618	0.015195	0.640924	-0.641775
C1I57_27775	A0A2R9W2B5	Anthranilate phosphoribosyltransferase (Fragment) OS=Escherichia coli OX=562 GN=C1I57_27775 PE=3 SV=1 - [A0A2R9W2B5_ECOLX]	57.79	18.43	154	5	5	7	369	40.7061	5.70654	0.000194882	0.000304108	0.0325135	0.0123243	0.640831	-0.641984
rpmH	A0A1Q6AEJ6	50S ribosomal protein L34 OS=Escherichia coli OX=562 GN=rpmH PE=3 SV=1 - [A0A1Q6AEJ6_ECOLX]	66.67	17.39	3	1	1	5	46	5.40511	12.9966	0.000182115	0.00028421	0.0465303	0.0151704	0.640776	-0.642108
uspA	A0A069XLS1	Universal stress protein OS=Escherichia coli 3-373-03_S4_C2 OX=1444252 GN=uspA PE=3 SV=1 - [A0A069XLS1_ECOLX]	1571.04	81.25	9	6	6	114	144	16.0301	5.46533	0.000195817	0.000305613	0.0224923	0.00980324	0.640735	-0.642201
glgB	A0A1X3KF29	1,4-alpha-glucan branching enzyme GlgB OS=Escherichia coli H605 OX=656410 GN=glgB PE=3 SV=1 - [A0A1X3KF29_ECOLX]	605.153	25.31	61	15	15	38	727	84.1498	6.44287	0.000194285	0.000303298	0.0141092	0.00741068	0.640575	-0.642561
alsB	A0A0A1AJN0	Allose ABC transporter OS=Escherichia coli OX=562 GN=alsB PE=4 SV=1 - [A0A0A1AJN0_ECOLX]	154.542	35.05	35	8	8	11	311	32.9051	6.87354	0.000191588	0.000299225	0.041851	0.0142755	0.64028	-0.643226
GJ11_05025	A0A193LP35	Ribosomal protein S12 methylthiotransferase accessory factor YcaO OS=Escherichia coli OX=562 GN=GJ11_05025 PE=4 SV=1 - [A0A193LP35_ECOLX]	134.873	14.16	11	1	7	10	586	65.6242	4.51318	0.000199737	0.000312128	0.039274	0.0137771	0.639919	-0.644039
BHS81_28995	A0A1X0YI40	Polysialic acid transporter (Fragment) OS=Escherichia coli OX=562 GN=BHS81_28995 PE=4 SV=1 - [A0A1X0YI40_ECOLX]	849.355	33.13	52	13	13	30	489	53.2255	8.01611	0.000198251	0.00030985	0.020879	0.00938521	0.639828	-0.644245
argE	A0A024KKV0	Acetylornithine deacetylase OS=Escherichia coli D6-113.11 OX=1400022 GN=argE PE=3 SV=1 - [A0A024KKV0_ECOLX]	193.141	32.9	22	1	9	13	383	42.3075	5.99854	0.000185183	0.00028944	0.0396607	0.0138537	0.639796	-0.644316
gadB	A0A0K3URA6	Glutamate decarboxylase OS=Escherichia coli OX=562 GN=gadB PE=3 SV=1 - [A0A0K3URA6_ECOLX]	24552.9	65.55	81	1	27	881	447	50.4641	5.66846	0.000204482	0.000319647	0.0119626	0.00671017	0.639712	-0.644505
BX51_25645	A0A025BZJ3	Biofilm formation regulator HmsP OS=Escherichia coli O145:NM str. 2010C-3526 OX=1446596 GN=BX51_25645 PE=4 SV=1 - [A0A025BZJ3_ECOLX]	19.92	3.39	3	2	2	2	649	72.9035	5.84619	0.000194227	0.000303716	0.0362614	0.0131574	0.639501	-0.644981
cysS	A0A0A0GT19	Cysteine--tRNA ligase OS=Escherichia coli OX=562 GN=cysS PE=3 SV=1 - [A0A0A0GT19_ECOLX]	710.342	43.48	45	16	16	45	437	49.3252	5.47803	0.0001967	0.000307654	0.00525233	0.00407199	0.639354	-0.645313
era	A0A069XNN3	GTPase Era OS=Escherichia coli 3-373-03_S4_C2 OX=1444252 GN=era PE=3 SV=1 - [A0A069XNN3_ECOLX]	78.33	12.62	26	4	4	6	301	33.8158	7.25439	0.000193329	0.000302543	0.0136176	0.0072538	0.639012	-0.646084
mpl	D8E3X8	UDP-N-acetylmuramate--L-alanyl-gamma-D-glutamyl-meso-2,6-diaminoheptandioate ligase OS=Escherichia coli MS 119-7 OX=679206 GN=mpl PE=3 SV=1 - [D8E3X8_ECOLX]	609.655	42.05	55	13	13	34	440	48.1063	5.73193	0.000193627	0.000303061	0.0423043	0.0143603	0.638903	-0.646331
alaC	A0A0A1A7C8	Alanine transaminase OS=Escherichia coli OX=562 GN=alaC PE=4 SV=1 - [A0A0A1A7C8_ECOLX]	499.804	39.08	51	13	13	33	412	46.2047	7.86963	0.000192532	0.000301549	0.0127189	0.00695716	0.638477	-0.647292
AC16_2700	A0A070V3H3	Bacterial regulatory s, gntR family protein OS=Escherichia coli 2-177-06_S3_C2 OX=1444151 GN=AC16_2700 PE=4 SV=1 - [A0A070V3H3_ECOLX]	125.916	16.09	28	2	2	5	230	26.0352	6.15088	0.000182717	0.000286323	0.0455977	0.0149944	0.638152	-0.648028
metJ	A0A0J2E163	Met repressor OS=Escherichia coli OX=562 GN=metJ PE=3 SV=1 - [A0A0J2E163_ECOLX]	258.248	34.29	15	3	3	9	105	12.0751	5.87158	0.000195274	0.000306066	0.0106662	0.00625618	0.638011	-0.648348
erfK	D8E6H4	Protein ErfK/srfK OS=Escherichia coli MS 119-7 OX=679206 GN=erfK PE=4 SV=1 - [D8E6H4_ECOLX]	172.33	38.63	12	2	9	19	277	30.7807	8.104	0.000190819	0.000299093	0.00444706	0.00373071	0.637993	-0.648387
mdoH	A0A066SX32	Glucans biosynthesis glucosyltransferase H OS=Escherichia coli OX=562 GN=mdoH PE=3 SV=1 - [A0A066SX32_ECOLX]	357.62	13.02	78	9	9	16	837	95.6944	8.74854	0.000187417	0.000293882	0.0107044	0.00627014	0.637729	-0.648985
NRG857_19140	A0A0H3EPE1	DNA recombination protein RmuC OS=Escherichia coli O83:H1 (strain NRG 857C / AIEC) OX=685038 GN=NRG857_19140 PE=4 SV=1 - [A0A0H3EPE1_ECO8N]	77.5563	20	53	8	8	9	470	54.0935	5.61768	0.000197235	0.000309288	0.0156626	0.00787887	0.637706	-0.649037
C6986_34465	A0A2T1MLQ0	7-carboxy-7-deazaguanine synthase QueE (Fragment) OS=Escherichia coli OX=562 GN=C6986_34465 PE=4 SV=1 - [A0A2T1MLQ0_ECOLX]	264.401	37.19	35	5	5	16	199	22.1552	5.42725	0.000190492	0.000298762	0.0055364	0.00420295	0.637604	-0.649267
JD73_16925	A0A085P0W7	DNA-binding protein OS=Escherichia coli OX=562 GN=JD73_16925 PE=3 SV=1 - [A0A085P0W7_ECOLX]	983.854	68.66	22	2	9	47	134	15.354	8.39697	0.000196492	0.000308373	0.0171029	0.00830723	0.63719	-0.650205
ftsK	A0A0K3QU62	DNA translocase FtsK OS=Escherichia coli OX=562 GN=ftsK PE=3 SV=1 - [A0A0K3QU62_ECOLX]	22.05	3.56	173	2	2	2	505	55.432	6.771	0.000202443	0.00031776	0.00530587	0.0040971	0.637093	-0.650424
trmD	A0A027TJP0	tRNA (guanine-N(1)-)-methyltransferase OS=Escherichia coli O111:NM str. K6722 OX=1446533 GN=trmD PE=3 SV=1 - [A0A027TJP0_ECOLX]	67.9897	19.61	28	5	5	5	255	28.4205	5.78271	0.000196629	0.000308659	0.0229859	0.00992711	0.637045	-0.650533
degS	E2QER1	Outer membrane-stress sensor serine endopeptidase DegS OS=Escherichia coli OX=562 GN=degS PE=4 SV=1 - [E2QER1_ECOLX]	177.021	26.76	24	7	7	9	355	37.6309	5.88428	0.000196867	0.000309104	0.0406539	0.0140475	0.636894	-0.650874
wecB	A0A0D8WAN7	UDP-N-acetylglucosamine 2-epimerase OS=Escherichia coli OX=562 GN=wecB PE=3 SV=1 - [A0A0D8WAN7_ECOLX]	126.052	28.72	17	2	9	11	376	42.1889	6.46826	0.000195562	0.000307108	0.0157314	0.00789869	0.636785	-0.651122
slyD	A0A0K4G3F2	Peptidyl-prolyl cis-trans isomerase OS=Escherichia coli OX=562 GN=slyD PE=3 SV=1 - [A0A0K4G3F2_ECOLX]	2274.33	51.03	17	6	6	108	194	20.6016	5.03369	0.000193432	0.000304002	0.00165582	0.00227449	0.636284	-0.652257
rplV	A0A0T5XIT1	50S ribosomal protein L22 OS=Escherichia coli OX=562 GN=rplV PE=3 SV=1 - [A0A0T5XIT1_ECOLX]	2756.11	64.55	7	9	9	100	110	12.1887	10.1841	0.000194475	0.000305694	0.0476087	0.0153702	0.636176	-0.652503
C6986_34695	A0A2T1MLG4	Tryptophan permease (Fragment) OS=Escherichia coli OX=562 GN=C6986_34695 PE=4 SV=1 - [A0A2T1MLG4_ECOLX]	105.72	8.33	68	1	1	2	168	18.1479	9.39307	0.000185195	0.00029122	0.0384608	0.0136139	0.635928	-0.653064
miaA	A0A028AMC7	tRNA dimethylallyltransferase OS=Escherichia coli O69:H11 str. 08-4661 OX=1446753 GN=miaA PE=3 SV=1 - [A0A028AMC7_ECOLX]	349.45	31.01	20	2	8	22	316	35.0712	6.01123	0.000188446	0.00029644	0.0152728	0.00776516	0.635697	-0.653589
A1U1_03958	S1CT08	Chromate reductase, Class I, flavoprotein OS=Escherichia coli KTE64 OX=1182671 GN=A1U1_03958 PE=4 SV=1 - [S1CT08_ECOLX]	367.29	49.61	52	5	5	24	129	13.6842	4.80518	0.000193695	0.000304707	0.00118132	0.00189115	0.635677	-0.653634
lolD_1	A0A0K5L3F0	ABC transporter ATP-binding protein OS=Escherichia coli OX=562 GN=lolD_1 PE=4 SV=1 - [A0A0K5L3F0_ECOLX]	72.7267	23.68	44	4	4	8	228	24.6169	5.96045	0.00019345	0.000304337	0.00479115	0.00387638	0.635646	-0.653705
der	A0A2T3U577	GTPase Der OS=Escherichia coli OX=562 GN=der PE=4 SV=1 - [A0A2T3U577_ECOLX]	464.894	40.2	19	1	18	41	490	55.0005	5.96045	0.000191182	0.000300788	0.0225976	0.00982987	0.635604	-0.653799
tesA	A0A024L6L9	Lysophospholipase OS=Escherichia coli OX=562 GN=tesA PE=4 SV=1 - [A0A024L6L9_ECOLX]	99.2592	45.18	46	6	6	10	166	18.8116	6.80029	0.000191506	0.000301383	0.0349293	0.0128696	0.635422	-0.654214
fabZ	A7ZWC6	3-hydroxyacyl-[acyl-carrier-protein] dehydratase FabZ OS=Escherichia coli O9:H4 (strain HS) OX=331112 GN=fabZ PE=3 SV=1 - [FABZ_ECOHS]	572.446	57.62	11	7	7	39	151	17.0119	7.38623	0.000189186	0.000297738	0.0110853	0.00640739	0.635409	-0.654243
AB67_1583	A0A073HI09	Helix-turn-helix family protein (Fragment) OS=Escherichia coli 5-366-08_S1_C3 OX=1444102 GN=AB67_1583 PE=4 SV=1 - [A0A073HI09_ECOLX]	33.57	7.14	51	1	1	1	126	13.8951	6.771	0.000184913	0.00029103	0.0367391	0.0132585	0.635374	-0.654322
BW70_22090	A0A026UKY1	Phosphoesterase OS=Escherichia coli O174:H8 str. 04-3038 OX=1446704 GN=BW70_22090 PE=3 SV=1 - [A0A026UKY1_ECOLX]	156.804	26.78	31	4	4	16	183	19.9584	6.04932	0.000192366	0.000302799	0.000872389	0.0016532	0.635291	-0.654511
dinG	A0A080HMC2	ATP-dependent DNA helicase DinG domain protein (Fragment) OS=Escherichia coli 1-250-04_S3_C2 OX=1444163 GN=dinG PE=4 SV=1 - [A0A080HMC2_ECOLX]	24.6	8.42	119	1	1	1	95	10.4045	8.49951	0.000203313	0.000320359	0.00809606	0.00526409	0.634641	-0.655988
HMPREF9552_01858	D7X5G8	Uncharacterized protein (Fragment) OS=Escherichia coli MS 198-1 OX=749549 GN=HMPREF9552_01858 PE=4 SV=1 - [D7X5G8_ECOLX]	28.7	26.92	111	1	1	1	52	5.94309	6.50732	0.000183326	0.000288882	0.00946137	0.00579724	0.634608	-0.656063
hemC	A0A0T5XNC2	Porphobilinogen deaminase OS=Escherichia coli OX=562 GN=hemC PE=3 SV=1 - [A0A0T5XNC2_ECOLX]	188.815	12.14	5	1	3	8	313	33.8809	6.18896	0.000201807	0.000318029	0.000445859	0.00124215	0.634556	-0.656181
pepP	A0A024KPZ2	Proline aminopeptidase P II OS=Escherichia coli D6-113.11 OX=1400022 GN=pepP PE=4 SV=1 - [A0A024KPZ2_ECOLX]	1232.42	48.53	96	16	16	67	441	49.7932	5.33838	0.000192387	0.00030324	0.0261672	0.0107554	0.634438	-0.656448
AZZ83_004317	A0A243UW90	Protein MalY OS=Escherichia coli OX=562 GN=AZZ83_004317 PE=4 SV=1 - [A0A243UW90_ECOLX]	62.32	30.39	83	5	5	5	204	22.4115	6.18896	0.000184435	0.000290864	0.00209247	0.00255492	0.634094	-0.657232
cysE	A0A025CPG0	Acetyltransferase OS=Escherichia coli O145:NM str. 2010C-3526 OX=1446596 GN=cysE PE=3 SV=1 - [A0A025CPG0_ECOLX]	254.556	30.04	19	7	7	23	273	29.346	6.52197	0.000191751	0.00030244	0.0450039	0.0148807	0.634014	-0.657414
CG692_24755	A0A2H9EHD8	Uncharacterized protein OS=Escherichia coli OX=562 GN=CG692_24755 PE=4 SV=1 - [A0A2H9EHD8_ECOLX]	2799.07	59.57	7	1	7	167	188	20.9198	7.41553	0.000199447	0.000314629	0.000367129	0.00112905	0.633912	-0.657646
ECW26_02060	I0VYN1	Transcriptional regulator, AraC family OS=Escherichia coli W26 OX=1090926 GN=ECW26_02060 PE=4 SV=1 - [I0VYN1_ECOLX]	173.962	29.32	25	8	8	24	249	28.5715	7.45947	0.000190846	0.000301085	0.00167381	0.00228742	0.633861	-0.657762
ribA	A0A0K4HBR7	GTP cyclohydrolase-2 OS=Escherichia coli OX=562 GN=ribA PE=3 SV=1 - [A0A0K4HBR7_ECOLX]	263.808	29.59	23	5	5	13	196	21.8382	5.94775	0.000194907	0.000307585	0.0206007	0.00931125	0.633669	-0.658199
ECONIH1_00670	A0A0A1A0U0	Hypoxanthine phosphoribosyltransferase OS=Escherichia coli OX=562 GN=ECONIH1_00670 PE=3 SV=1 - [A0A0A1A0U0_ECOLX]	459.214	42.7	23	6	6	26	178	20.1024	5.19873	0.000190026	0.000299882	0.0376582	0.01345	0.633668	-0.658201
ECW26_08860	I0VWI5	Heat shock protein IbpA OS=Escherichia coli W26 OX=1090926 GN=ECW26_08860 PE=3 SV=1 - [I0VWI5_ECOLX]	250.811	51.76	10	5	5	14	85	9.76015	5.90967	0.000188307	0.00029727	0.00443785	0.00372667	0.633452	-0.658692
rplS	B7MIU4	50S ribosomal protein L19 OS=Escherichia coli O45:K1 (strain S88 / ExPEC) OX=585035 GN=rplS PE=3 SV=1 - [RL19_ECO45]	2886.87	66.96	6	1	8	145	115	13.1252	10.6235	0.000194224	0.000306637	0.0372839	0.0133725	0.633399	-0.658815
aroA	A0A066T4M3	3-phosphoshikimate 1-carboxyvinyltransferase OS=Escherichia coli OX=562 GN=aroA PE=3 SV=1 - [A0A066T4M3_ECOLX]	200.27	28.1	24	5	12	27	427	46.1785	5.87158	0.000194776	0.000307575	0.0138168	0.00731791	0.633264	-0.659121
aceE	A0A0K4FH42	Pyruvate dehydrogenase E1 component OS=Escherichia coli OX=562 GN=aceE PE=4 SV=1 - [A0A0K4FH42_ECOLX]	4813.43	61.1	5	1	44	246	887	99.712	5.79541	0.00018691	0.000295164	0.0391805	0.0137585	0.633241	-0.659172
add	T9A3W2	Adenosine deaminase OS=Escherichia coli UMEA 3200-1 OX=1281213 GN=add PE=3 SV=1 - [T9A3W2_ECOLX]	862.709	38.74	12	2	10	51	333	36.3358	5.61768	0.000176095	0.000278109	0.0392287	0.0137681	0.633188	-0.659295
metN	A0A0H0KGL7	Methionine import ATP-binding protein MetN OS=Escherichia coli OX=562 GN=metN PE=3 SV=1 - [A0A0H0KGL7_ECOLX]	159.75	14.29	36	4	4	5	343	37.7597	6.32861	0.000189347	0.000299109	0.00413493	0.00360187	0.633035	-0.659643
sapD	A0A0K3MZN6	Peptide ABC transporter ATP-binding protein OS=Escherichia coli OX=562 GN=sapD PE=3 SV=1 - [A0A0K3MZN6_ECOLX]	113.301	17.58	22	6	6	9	330	37.6355	9.12939	0.000195079	0.000308181	0.00108016	0.00180736	0.633001	-0.659721
ACN81_07990	A0A1Q6AYT4	Acyl-CoA esterase OS=Escherichia coli OX=562 GN=ACN81_07990 PE=4 SV=1 - [A0A1Q6AYT4_ECOLX]	34.34	24.24	9	3	3	4	132	14.2494	7.88428	0.000193301	0.000305455	0.0124572	0.00687309	0.632829	-0.660113
ERS085374_01597	A0A0K3GL21	YjbD family (DUF3811) OS=Escherichia coli OX=562 GN=ERS085374_01597 PE=4 SV=1 - [A0A0K3GL21_ECOLX]	82.656	22.45	12	1	1	2	49	5.66305	10.4038	0.000201213	0.000317962	0.0264233	0.0108236	0.63282	-0.660133
rnd	W1F084	Ribonuclease D OS=Escherichia coli ISC7 OX=1432555 GN=rnd PE=3 SV=1 - [W1F084_ECOLX]	0	6.91	68	2	2	3	333	38.0026	5.46533	0.000193747	0.000306372	0.00338253	0.00329316	0.632389	-0.661115
fabR	A0A029HEJ4	HTH-type transcriptional repressor FabR OS=Escherichia coli 2-005-03_S4_C3 OX=1444258 GN=fabR PE=3 SV=1 - [A0A029HEJ4_ECOLX]	70.52	20.47	34	4	4	7	215	24.4177	9.68604	0.000191802	0.000303299	0.0165792	0.00815349	0.632386	-0.661122
icd	Q7WV54	Isocitrate dehydrogenase [NADP] (Fragment) OS=Escherichia coli OX=562 GN=icd PE=4 SV=1 - [Q7WV54_ECOLX]	4416.29	66.84	43	1	24	227	389	42.9071	5.46533	0.000194228	0.000307168	0.000847215	0.0016317	0.632317	-0.66128
BET08_21405	A0A1V2T0D1	RNA polymerase sigma factor (Fragment) OS=Escherichia coli OX=562 GN=BET08_21405 PE=3 SV=1 - [A0A1V2T0D1_ECOLX]	236.746	62.04	13	6	6	17	137	15.492	5.31299	0.000185213	0.000292921	0.00396862	0.00353936	0.632298	-0.661322
yhfA	A0A023Z3Z6	OsmC/Ohr family protein OS=Escherichia coli O145:H28 str. RM12581 OX=1248823 GN=yhfA PE=4 SV=1 - [A0A023Z3Z6_ECOLX]	121.943	49.25	16	3	5	10	134	14.5354	5.80811	0.000183495	0.000290283	0.0215281	0.00955463	0.632124	-0.66172
gshA	A0A070UWK4	Glutamate--cysteine ligase OS=Escherichia coli 2-177-06_S3_C2 OX=1444151 GN=gshA PE=3 SV=1 - [A0A070UWK4_ECOLX]	583.105	35.33	66	14	14	30	518	58.2583	5.38916	0.000188407	0.00029813	0.00503891	0.00397501	0.631962	-0.662091
BET08_26050	A0A1V2SVT8	Uncharacterized protein (Fragment) OS=Escherichia coli OX=562 GN=BET08_26050 PE=4 SV=1 - [A0A1V2SVT8_ECOLX]	198.734	44.44	32	6	6	15	90	10.6708	12.0737	0.000193931	0.000306873	3.04256e-05	0.000266694	0.631959	-0.662097
AZZ83_002741	A0A192ETI6	Response regulator GlrR OS=Escherichia coli OX=562 GN=AZZ83_002741 PE=4 SV=1 - [A0A192ETI6_ECOLX]	33.45	6.53	67	3	3	4	444	49.1628	6.27783	0.000188477	0.00029826	0.0070119	0.0048201	0.631924	-0.662177
fdoG	D3H526	Formate dehydrogenase-O, major subunit OS=Escherichia coli O44:H18 (strain 042 / EAEC) OX=216592 GN=fdoG PE=3 SV=1 - [D3H526_ECO44]	1442.74	43.74	92	7	33	73	1015	112.369	7.40088	0.000189697	0.000300839	0.0134382	0.00719542	0.630558	-0.665299
modE	B7MGL8	DNA-binding transcriptional dual regulator OS=Escherichia coli O45:K1 (strain S88 / ExPEC) OX=585035 GN=modE PE=4 SV=1 - [B7MGL8_ECO45]	86.04	29.77	34	5	5	5	262	28.2357	5.43994	0.000191211	0.000303327	0.0343034	0.0127313	0.630379	-0.665709
hdeA	A0A0K4GHQ6	Acid stress chaperone HdeA OS=Escherichia coli OX=562 GN=hdeA PE=3 SV=1 - [A0A0K4GHQ6_ECOLX]	44.58	26.13	1	2	2	7	111	11.9362	5.57959	0.000175224	0.000278289	0.0157029	0.0078905	0.629648	-0.667384
ipaB	Q8KQC7	Invasion plasmid antigen IpaB OS=Escherichia coli OX=562 GN=ipaB PE=4 SV=1 - [Q8KQC7_ECOLX]	0	3.62	1	1	1	1	580	62.1323	8.68994	0.000211164	0.000335497	0.00831544	0.00535412	0.629407	-0.667935
BMR23_06060	A0A2B7LX43	S-(hydroxymethyl)glutathione dehydrogenase OS=Escherichia coli OX=562 GN=BMR23_06060 PE=3 SV=1 - [A0A2B7LX43_ECOLX]	192.544	34.69	10	1	10	25	369	39.3008	6.354	0.000187609	0.000298082	0.00235248	0.00273136	0.629388	-0.667979
AOX65_17740	A0A0T5XRQ4	Uncharacterized protein OS=Escherichia coli OX=562 GN=AOX65_17740 PE=4 SV=1 - [A0A0T5XRQ4_ECOLX]	507.479	27.44	1	1	6	36	164	18.6023	9.45166	0.000190272	0.000302406	0.03435	0.0127416	0.629194	-0.668424
serS	A0A029I7U9	Serine--tRNA ligase OS=Escherichia coli 2-005-03_S4_C3 OX=1444258 GN=serS PE=3 SV=1 - [A0A029I7U9_ECOLX]	1356.35	56.05	27	18	18	89	430	48.4266	5.59229	0.000189581	0.000301308	0.00236761	0.0027411	0.629192	-0.668427
truD	Q0TEB3	tRNA pseudouridine synthase D OS=Escherichia coli O6:K15:H31 (strain 536 / UPEC) OX=362663 GN=truD PE=3 SV=1 - [TRUD_ECOL5]	229.931	45.27	34	1	12	23	349	39.1103	6.56592	0.000190769	0.000303223	0.0291426	0.0115206	0.62914	-0.668547
csdA	A0A024KQ38	Cysteine desulfurase, catalytic subunit CsdA OS=Escherichia coli D6-113.11 OX=1400022 GN=csdA PE=3 SV=1 - [A0A024KQ38_ECOLX]	49.95	9.73	96	4	4	4	401	43.2741	5.78271	0.000189087	0.000300567	0.0211852	0.00946568	0.629103	-0.668631
APX76_00475	A0A2T8HED1	LysR family transcriptional regulator (Fragment) OS=Escherichia coli OX=562 GN=APX76_00475 PE=4 SV=1 - [A0A2T8HED1_ECOLX]	107.581	29.12	31	8	8	10	261	28.9734	6.43018	0.000191759	0.000304946	0.0182663	0.00865704	0.62883	-0.669257
yeaH	C3T6U0	UPF0229 protein YeaH OS=Escherichia coli OX=562 GN=yeaH PE=3 SV=1 - [C3T6U0_ECOLX]	116.064	16.39	3	1	6	11	427	49.4188	7.2251	0.000200657	0.000319209	0.00182446	0.00239072	0.628606	-0.669773
C5N07_12715	A0A2S8I524	YaiI/YqxD family protein OS=Escherichia coli OX=562 GN=C5N07_12715 PE=4 SV=1 - [A0A2S8I524_ECOLX]	67.0396	24.17	36	2	2	3	120	13.2798	8.00146	0.000184142	0.000293012	0.0241872	0.0102235	0.628445	-0.670142
rpsO	A0A090AY10	30S ribosomal protein S15 OS=Escherichia coli OX=562 GN=rpsO PE=3 SV=1 - [A0A090AY10_ECOLX]	748.166	59.55	9	1	4	21	89	10.2615	10.6528	0.000194235	0.000309166	0.0355617	0.0130073	0.628256	-0.670576
aroK	A0A069XPH7	Shikimate kinase 1 OS=Escherichia coli 3-373-03_S4_C2 OX=1444252 GN=aroK PE=3 SV=1 - [A0A069XPH7_ECOLX]	706.061	54.91	17	8	8	31	173	19.5402	5.50342	0.000195922	0.000311892	0.00493102	0.00393267	0.628172	-0.670767
C6985_21250	A0A2T1LE63	Uncharacterized protein OS=Escherichia coli OX=562 GN=C6985_21250 PE=4 SV=1 - [A0A2T1LE63_ECOLX]	364.995	9.57	3	1	2	34	188	20.9827	8.08936	0.000184251	0.000293389	0.00345757	0.00332717	0.62801	-0.671141
amn	A0A0G9FGV8	AMP nucleosidase OS=Escherichia coli OX=562 GN=amn PE=3 SV=1 - [A0A0G9FGV8_ECOLX]	490.781	42.98	79	7	17	35	484	53.9935	6.53662	0.000191658	0.000305191	0.00368849	0.00342706	0.627992	-0.671181
ybbL	A0A0A1A4X9	ABC transporter ATP-binding protein OS=Escherichia coli OX=562 GN=ybbL PE=4 SV=1 - [A0A0A1A4X9_ECOLX]	48.5773	29.33	45	5	5	6	225	25.3521	5.2749	0.000187325	0.000298356	0.00684493	0.00475467	0.627857	-0.671492
wzzE	I0VX78	ECA polysaccharide chain length modulation protein OS=Escherichia coli W26 OX=1090926 GN=wzzE PE=3 SV=1 - [I0VX78_ECOLX]	322.679	32.27	50	8	8	21	313	35.5289	7.34229	0.000190248	0.000303037	0.0227771	0.00987501	0.627805	-0.671612
HMPREF1620_04946	U9ZMG0	Uridine kinase OS=Escherichia coli 909945-2 OX=1269007 GN=HMPREF1620_04946 PE=3 SV=1 - [U9ZMG0_ECOLX]	77.1529	31.41	19	3	5	6	156	18.1376	8.63135	0.000195357	0.000311415	0.000278396	0.000981555	0.62732	-0.672726
rplR	P0C020	50S ribosomal protein L18 OS=Escherichia coli O157:H7 OX=83334 GN=rplR PE=3 SV=1 - [RL18_ECO57]	1360.22	54.7	2	7	7	65	117	12.7619	10.4185	0.00018995	0.000302891	0.0314795	0.0120818	0.627122	-0.673182
G925_04545	A0A0E2KXE2	Peptidyl-prolyl cis-trans isomerase OS=Escherichia coli (strain UMEA 3162-1) OX=1281200 GN=G925_04545 PE=3 SV=1 - [A0A0E2KXE2_ECOU3]	745.099	52.43	41	9	9	36	206	22.2015	4.95752	0.00019344	0.000308821	0.00385029	0.00349305	0.626383	-0.674882
secF	A0A073G1X6	Protein-export membrane protein SecF OS=Escherichia coli 2-427-07_S4_C3 OX=1444266 GN=secF PE=3 SV=1 - [A0A073G1X6_ECOLX]	251.903	22.29	16	5	5	9	323	35.3876	5.84619	0.000183604	0.000293264	0.0122204	0.00679575	0.626069	-0.675606
BMR23_21320	A0A2B7LY00	Glycine betaine ABC transporter substrate-binding protein OS=Escherichia coli OX=562 GN=BMR23_21320 PE=4 SV=1 - [A0A2B7LY00_ECOLX]	600.248	41.82	8	2	9	31	330	35.9879	6.354	0.000192123	0.000306896	0.0164129	0.00810387	0.626019	-0.675723
uspE	A0A070V0D1	Universal stress protein E OS=Escherichia coli 2-177-06_S3_C2 OX=1444151 GN=uspE PE=4 SV=1 - [A0A070V0D1_ECOLX]	2047.06	55.7	42	14	14	86	316	35.6263	5.40186	0.000190231	0.000303947	0.00139401	0.00206999	0.625868	-0.67607
hemC	H4JFM3	Porphobilinogen deaminase OS=Escherichia coli DEC1D OX=868136 GN=hemC PE=3 SV=1 - [H4JFM3_ECOLX]	482.005	54.95	55	9	11	29	313	33.8318	5.46533	0.000192083	0.00030692	0.0495547	0.0157211	0.625841	-0.676132
BY96_17125	A0A027TS95	Trehalose 6-phosphate phosphatase OS=Escherichia coli O111:NM str. K6722 OX=1446533 GN=BY96_17125 PE=3 SV=1 - [A0A027TS95_ECOLX]	701.4	45.49	59	9	9	25	266	29.1429	5.61768	0.00019161	0.000306221	0.00164851	0.0022692	0.625724	-0.676402
ybgC	A0A0K3W7N5	Acyl-CoA thioester hydrolase OS=Escherichia coli OX=562 GN=ybgC PE=4 SV=1 - [A0A0K3W7N5_ECOLX]	63.4	17.16	13	3	3	5	134	15.551	8.67529	0.000189147	0.000302285	0.00294829	0.00307953	0.625724	-0.676402
ndh	A0A2D0NPE8	Respiratory NADH dehydrogenase 2/cupricreductase OS=Escherichia coli O127:H6 OX=168807 GN=ndh PE=4 SV=1 - [A0A2D0NPE8_ECOLX]	575.011	40.96	39	14	14	41	415	45.5106	8.71924	0.000188392	0.000301133	0.00394177	0.00352899	0.625609	-0.676666
AZZ83_001546	A0A192EVW8	Protein YrdA OS=Escherichia coli OX=562 GN=AZZ83_001546 PE=4 SV=1 - [A0A192EVW8_ECOLX]	304.474	89.67	23	4	13	27	184	20.2023	5.80811	0.000198027	0.000316535	0.000310259	0.00103924	0.625608	-0.676669
AB08_1138	A0A073UTB7	Pyruvate kinase OS=Escherichia coli 5-366-08_S1_C1 OX=1444047 GN=AB08_1138 PE=3 SV=1 - [A0A073UTB7_ECOLX]	5178.92	74.04	20	13	29	226	470	50.6843	6.0874	0.000187222	0.00029931	0.0424713	0.0143914	0.625511	-0.676893
NRG857_10645	A0A0H3EIZ7	Fructose-bisphosphate aldolase OS=Escherichia coli O83:H1 (strain NRG 857C / AIEC) OX=685038 GN=NRG857_10645 PE=4 SV=1 - [A0A0H3EIZ7_ECO8N]	3849.9	60.86	50	18	18	174	350	38.1132	6.72705	0.00018681	0.000298767	0.006796	0.00473523	0.62527	-0.67745
G925_00857	A0A0E2L873	Macrolide-specific efflux protein macA OS=Escherichia coli (strain UMEA 3162-1) OX=1281200 GN=G925_00857 PE=3 SV=1 - [A0A0E2L873_ECOU3]	168.273	21.02	70	6	6	6	371	40.7039	8.82178	0.000192034	0.000307168	0.00917576	0.00569085	0.625178	-0.677662
ackA	B7UFV4	Acetate kinase OS=Escherichia coli O127:H6 (strain E2348/69 / EPEC) OX=574521 GN=ackA PE=3 SV=1 - [B7UFV4_ECO27]	3568.38	75.75	19	17	17	125	400	43.2911	6.27783	0.00018933	0.000302876	0.0279419	0.0112189	0.625108	-0.677822
ECW26_17490	I0VTW9	Bifunctional protein Aas OS=Escherichia coli W26 OX=1090926 GN=ECW26_17490 PE=3 SV=1 - [I0VTW9_ECOLX]	158.507	13.72	92	9	9	11	707	79.1928	9.15869	0.000193709	0.000310035	0.00240074	0.00276222	0.624796	-0.678542
A8M42_16240	A0A210GAG1	Uncharacterized protein OS=Escherichia coli OX=562 GN=A8M42_16240 PE=4 SV=1 - [A0A210GAG1_ECOLX]	35.13	44.44	29	2	2	2	81	8.98333	5.13525	0.000196356	0.000314316	0.0018193	0.00238732	0.624708	-0.678747
lpxC	A0A0K3JCN7	UDP-3-O-acyl-N-acetylglucosamine deacetylase OS=Escherichia coli OX=562 GN=lpxC PE=3 SV=1 - [A0A0K3JCN7_ECOLX]	238.628	17.05	15	6	6	15	305	33.9763	5.85889	0.000185423	0.000296834	0.00205889	0.00253558	0.62467	-0.678835
ispE	A0A066T148	4-diphosphocytidyl-2-C-methyl-D-erythritol kinase OS=Escherichia coli OX=562 GN=ispE PE=3 SV=1 - [A0A066T148_ECOLX]	136.918	20.49	53	4	4	5	283	30.9359	5.26221	0.000188341	0.000301523	0.00490759	0.00392335	0.624635	-0.678916
BXT93_07435	A0A1V2GHI6	Uncharacterized protein (Fragment) OS=Escherichia coli OX=562 GN=BXT93_07435 PE=4 SV=1 - [A0A1V2GHI6_ECOLX]	140.161	22.14	48	6	6	7	402	45.684	6.81494	0.000190524	0.000305054	0.0244739	0.0102931	0.624559	-0.67909
trxA	A0A0E1LG92	Thioredoxin OS=Escherichia coli OX=562 GN=trxA PE=3 SV=1 - [A0A0E1LG92_ECOLX]	1199.57	62.39	14	6	6	51	109	11.8271	4.88135	0.000181351	0.000290423	0.0414821	0.0142058	0.624437	-0.679371
NRG857_02775	A0A0H3EGA0	Ribonuclease I OS=Escherichia coli O83:H1 (strain NRG 857C / AIEC) OX=685038 GN=NRG857_02775 PE=3 SV=1 - [A0A0H3EGA0_ECO8N]	162.307	30.97	65	6	6	12	268	29.6547	8.26514	0.00018522	0.000296674	0.000875842	0.00165609	0.624323	-0.679635
EC1094V2_2107	A0A2K4P8Y5	Membrane protein OS=Escherichia coli OX=562 GN=EC1094V2_2107 PE=3 SV=1 - [A0A2K4P8Y5_ECOLX]	56.3967	13.28	60	3	3	4	256	28.0596	6.94678	0.000188931	0.000302627	0.00492789	0.00393143	0.624304	-0.679679
rpoC	A0A2T1LCS6	DNA-directed RNA polymerase subunit beta OS=Escherichia coli OX=562 GN=rpoC PE=4 SV=1 - [A0A2T1LCS6_ECOLX]	7184.52	46.84	5	1	59	371	1407	155.075	6.75635	0.000191294	0.000306424	0.0220847	0.00969922	0.624276	-0.679743
BW70_14470	A0A026UUX3	Two-component response-regulatory protein YehT OS=Escherichia coli O174:H8 str. 04-3038 OX=1446704 GN=BW70_14470 PE=4 SV=1 - [A0A026UUX3_ECOLX]	77.2867	18.83	25	4	4	4	239	27.3984	6.23975	0.000197208	0.00031609	0.0127074	0.00695351	0.623899	-0.680616
ubiE	B7N2E1	Ubiquinone/menaquinone biosynthesis C-methyltransferase UbiE OS=Escherichia coli O81 (strain ED1a) OX=585397 GN=ubiE PE=3 SV=1 - [UBIE_ECO81]	504.847	51	9	1	11	26	251	28.0853	7.98682	0.000199813	0.000320277	0.00722297	0.0049009	0.623876	-0.680669
EAZG_01527	A0A1X3LXG3	Glutamate decarboxylase (Fragment) OS=Escherichia coli TA249 OX=656441 GN=EAZG_01527 PE=3 SV=1 - [A0A1X3LXG3_ECOLX]	21917.7	77.43	81	1	25	825	412	46.3951	5.36377	0.000210558	0.000337731	0.0446675	0.0148162	0.623448	-0.681658
rlmM	A0A029HKJ5	Ribosomal RNA large subunit methyltransferase M OS=Escherichia coli 2-005-03_S4_C3 OX=1444258 GN=rlmM PE=3 SV=1 - [A0A029HKJ5_ECOLX]	269.032	28.53	49	9	9	22	361	41.2518	7.10791	0.000186622	0.000299388	0.00156007	0.00220335	0.623345	-0.681898
C1I57_28350	A0A2R9W1Z7	Ribosomal RNA large subunit methyltransferase G (Fragment) OS=Escherichia coli OX=562 GN=C1I57_28350 PE=3 SV=1 - [A0A2R9W1Z7_ECOLX]	92.44	14.29	82	4	4	7	350	39.0733	6.90283	0.00018591	0.000298314	0.000645772	0.00146055	0.623203	-0.682227
ppiA	A0A1D3KFV9	Peptidyl-prolyl cis-trans isomerase OS=Escherichia coli OX=562 GN=ppiA PE=3 SV=1 - [A0A1D3KFV9_ECOLX]	195.744	30.16	1	1	5	16	189	20.3763	8.90967	0.000197632	0.000317197	0.0206485	0.00932401	0.623057	-0.682565
rbsK	A0A029HGS3	Ribokinase OS=Escherichia coli 2-005-03_S4_C3 OX=1444258 GN=rbsK PE=3 SV=1 - [A0A029HGS3_ECOLX]	304.028	21.68	70	6	6	13	309	32.2728	5.08447	0.000189181	0.000303722	0.00295324	0.00308214	0.622876	-0.682982
gadA	A0A0H2YZJ8	Glutamate decarboxylase OS=Escherichia coli O1:K1 / APEC OX=405955 GN=gadA PE=3 SV=1 - [A0A0H2YZJ8_ECOK1]	26464.1	79.07	87	1	27	990	430	48.5	5.43994	0.000205416	0.000329824	0.0293494	0.0115716	0.622805	-0.683148
C6985_23280	A0A2T1LCL2	Thiol:disulfide interchange protein DsbA OS=Escherichia coli OX=562 GN=C6985_23280 PE=4 SV=1 - [A0A2T1LCL2_ECOLX]	163.606	15.94	4	1	2	5	207	22.9557	5.60498	0.000199564	0.000320504	0.00507665	0.0039896	0.622656	-0.683494
ECW26_34510	I0VPE9	Pyruvate formate-lyase-activating enzyme OS=Escherichia coli W26 OX=1090926 GN=ECW26_34510 PE=3 SV=1 - [I0VPE9_ECOLX]	409.383	50.7	27	9	9	28	215	24.8303	6.37939	0.00018872	0.000303089	0.0380008	0.0135203	0.622655	-0.683494
gltA	A0A0T5XP68	Citrate synthase OS=Escherichia coli OX=562 GN=gltA PE=3 SV=1 - [A0A0T5XP68_ECOLX]	2103.04	28.57	1	1	11	110	427	48.0949	6.43018	0.000190756	0.000306621	0.0447287	0.0148278	0.622122	-0.68473
gor	Q8X4L2	Glutathione oxidoreductase OS=Escherichia coli O157:H7 OX=83334 GN=gor PE=3 SV=2 - [Q8X4L2_ECO57]	1744.56	58.44	46	18	18	74	450	48.7046	5.99854	0.000185702	0.000298604	0.0166507	0.00817471	0.6219	-0.685246
BE963_25345	A0A1U9T4H8	Phosphohydrolase OS=Escherichia coli OX=562 GN=BE963_25345 PE=4 SV=1 - [A0A1U9T4H8_ECOLX]	0	3.9	1	1	1	1	231	25.8411	6.25244	0.000186688	0.000300291	0.0127618	0.00697081	0.621691	-0.68573
relA	A0A0D8WD13	(P)ppGpp synthetase OS=Escherichia coli OX=562 GN=relA PE=3 SV=1 - [A0A0D8WD13_ECOLX]	422.447	24.19	37	16	16	24	744	83.8531	6.771	0.000189116	0.000304206	0.0477832	0.0154022	0.621672	-0.685774
BMR13_26320	A0A2B7SBH4	Uncharacterized protein OS=Escherichia coli OX=562 GN=BMR13_26320 PE=4 SV=1 - [A0A2B7SBH4_ECOLX]	371.414	13.96	8	1	11	25	1039	106.378	6.22705	0.00020485	0.000329522	0.00515506	0.00402586	0.621657	-0.68581
tldD	A0A136WX72	Metalloprotease TldD OS=Escherichia coli OX=562 GN=tldD PE=4 SV=1 - [A0A136WX72_ECOLX]	1618.81	47.82	20	1	14	59	481	51.3311	5.09717	0.000193713	0.000311653	0.00318444	0.00319942	0.621566	-0.68602
gapA	A0A026UTM2	D-erythrose-4-phosphate dehydrogenase OS=Escherichia coli O174:H8 str. 04-3038 OX=1446704 GN=gapA PE=3 SV=1 - [A0A026UTM2_ECOLX]	102.54	22.12	36	7	8	9	339	37.2072	6.63916	0.000195861	0.000315161	0.00208892	0.0025529	0.621465	-0.686256
yceF	A0A024L4Z8	Maf-like protein YceF OS=Escherichia coli OX=562 GN=yceF PE=3 SV=1 - [A0A024L4Z8_ECOLX]	104.668	46.91	42	6	6	9	194	21.7032	6.29053	0.000181321	0.000291776	0.00238164	0.00275008	0.621439	-0.686315
G925_00927	A0A0E2L7S7	Aminotransferase OS=Escherichia coli (strain UMEA 3162-1) OX=1281200 GN=G925_00927 PE=3 SV=1 - [A0A0E2L7S7_ECOU3]	2184.46	70.96	59	1	28	131	396	43.5421	5.77002	0.000185526	0.000298654	0.0121643	0.00677726	0.621206	-0.686857
rpiR	A0A070SVL4	HTH-type transcriptional regulator rpiR OS=Escherichia coli 2-210-07_S3_C3 OX=1444180 GN=rpiR PE=4 SV=1 - [A0A070SVL4_ECOLX]	78.5587	13.18	11	2	3	3	296	32.3237	6.53662	0.000182431	0.000293724	0.0057581	0.00430143	0.621098	-0.687107
slyB	B7M9Z5	Putative outer membrane lipoprotein OS=Escherichia coli O45:K1 (strain S88 / ExPEC) OX=585035 GN=slyB PE=4 SV=1 - [B7M9Z5_ECO45]	3614.03	77.42	15	8	8	121	155	15.618	8.83643	0.000187176	0.000301422	0.000689611	0.00149789	0.620976	-0.687392
ECW26_19790	I0VTQ3	Sigma E regulatory protein, MucB/RseB OS=Escherichia coli W26 OX=1090926 GN=ECW26_19790 PE=4 SV=1 - [I0VTQ3_ECOLX]	147.89	43.86	36	9	9	16	285	32.3065	8.07471	0.000190725	0.000307273	0.0102391	0.00609737	0.620701	-0.688028
mtnN	A0A0H0GZW8	5'-methylthioadenosine/S-adenosylhomocysteine nucleosidase OS=Escherichia coli OX=562 GN=mtnN PE=3 SV=1 - [A0A0H0GZW8_ECOLX]	521.318	44.4	32	6	6	17	232	24.3526	5.24951	0.000186646	0.000300821	0.00472699	0.00385001	0.620456	-0.688599
rpsG	B7MCV6	30S ribosomal protein S7 OS=Escherichia coli O45:K1 (strain S88 / ExPEC) OX=585035 GN=rpsG PE=3 SV=1 - [RS7_ECO45]	1906.92	62.82	13	9	9	102	156	17.5934	10.3013	0.000188073	0.000303208	0.0395201	0.013826	0.620277	-0.689015
sufD	B7US20	Component of SufBCD complex OS=Escherichia coli O127:H6 (strain E2348/69 / EPEC) OX=574521 GN=sufD PE=4 SV=1 - [B7US20_ECO27]	976.797	32.39	16	1	10	33	423	46.6878	6.91748	0.000177787	0.000286637	0.0443693	0.0147596	0.62025	-0.689077
infC	B1IPL0	Translation initiation factor IF-3 OS=Escherichia coli (strain ATCC 8739 / DSM 1576 / Crooks) OX=481805 GN=infC PE=3 SV=1 - [IF3_ECOLC]	1429.97	53.33	10	8	8	60	180	20.5511	9.5249	0.000188195	0.000303528	0.00335327	0.00327969	0.620025	-0.689602
leuS	B7NM01	Leucine--tRNA ligase OS=Escherichia coli O7:K1 (strain IAI39 / ExPEC) OX=585057 GN=leuS PE=3 SV=1 - [SYL_ECO7I]	2480.89	51.63	12	1	40	138	860	97.1854	5.32568	0.000195367	0.000315231	0.0123822	0.00684873	0.619757	-0.690225
hemG	A0A0J8XSD9	Menaquinone-dependent protoporphyrinogen IX dehydrogenase OS=Escherichia coli OX=562 GN=hemG PE=4 SV=1 - [A0A0J8XSD9_ECOLX]	119.038	44.2	28	7	7	13	181	21.1859	9.67139	0.000188946	0.000304872	0.00506275	0.00398424	0.619754	-0.690233
AC93_3577	A0A029IJT6	Uncharacterized protein OS=Escherichia coli 2-005-03_S4_C2 OX=1444228 GN=AC93_3577 PE=4 SV=1 - [A0A029IJT6_ECOLX]	329.095	20.57	68	10	10	18	637	71.8271	5.80811	0.000187261	0.000302161	0.0155427	0.00784414	0.619739	-0.690268
BET08_34000	A0A1V2T759	DNA-binding transcriptional regulator OxyR (Fragment) OS=Escherichia coli OX=562 GN=BET08_34000 PE=4 SV=1 - [A0A1V2T759_ECOLX]	335.084	32	27	8	8	25	300	33.7144	6.27783	0.000189581	0.000306197	0.000452164	0.00125057	0.619147	-0.691647
rcsF	A0A0H3PJN7	Outer membrane lipoprotein RcsF OS=Escherichia coli O157:H7 (strain EC869) OX=478008 GN=rcsF PE=3 SV=1 - [A0A0H3PJN7_ECO5C]	473.124	51.28	25	4	4	18	117	12.4093	9.27588	0.000185073	0.000298972	0.0018843	0.00242943	0.619033	-0.691913
ffh	D8EEK2	Signal recognition particle protein (Fragment) OS=Escherichia coli MS 119-7 OX=679206 GN=ffh PE=3 SV=1 - [D8EEK2_ECOLX]	1081.65	40.23	28	15	15	57	440	48.0723	9.26123	0.000187108	0.000302284	0.00268565	0.0029345	0.618981	-0.692032
tsf	A0A0T5XFM7	Elongation factor Ts OS=Escherichia coli OX=562 GN=tsf PE=3 SV=1 - [A0A0T5XFM7_ECOLX]	6253.25	53.71	3	4	16	271	283	30.3667	5.19873	0.000188993	0.000305368	0.0498558	0.0157743	0.618901	-0.692219
ECSE_4668	B6I6P0	Murein transglycosylase OS=Escherichia coli (strain SE11) OX=409438 GN=ECSE_4668 PE=4 SV=1 - [B6I6P0_ECOSE]	858.621	57.41	99	30	31	69	634	71.954	8.51416	0.000186852	0.000301943	0.00947762	0.00580321	0.618834	-0.692375
ampD	A0A0A1A0T1	1,6-anhydro-N-acetylmuramyl-L-alanine amidase AmpD OS=Escherichia coli OX=562 GN=ampD PE=4 SV=1 - [A0A0A1A0T1_ECOLX]	26.54	19.67	35	3	3	5	183	20.5202	5.5415	0.000182512	0.000295055	0.0127781	0.00697599	0.618569	-0.692994
dcp	D3GSH4	Dipeptidyl carboxypeptidase II OS=Escherichia coli O44:H18 (strain 042 / EAEC) OX=216592 GN=dcp PE=3 SV=1 - [D3GSH4_ECO44]	722.045	34.36	43	1	19	51	681	77.5439	5.68115	0.000192733	0.000311594	0.00126542	0.00195833	0.618538	-0.693065
BMR26_01465	A0A229EV71	Molybdopterin molybdenumtransferase MoeA OS=Escherichia coli OX=562 GN=BMR26_01465 PE=4 SV=1 - [A0A229EV71_ECOLX]	452.22	35.28	85	5	8	18	411	43.9225	5.07178	0.000194395	0.000314403	0.0100735	0.00603448	0.618298	-0.693625
birA	A0A0K5D7I8	Bifunctional ligase/repressor BirA OS=Escherichia coli OX=562 GN=birA PE=3 SV=1 - [A0A0K5D7I8_ECOLX]	33.0571	26.17	46	6	6	6	321	35.3738	6.82959	0.000190539	0.000308208	0.00611758	0.00445459	0.618214	-0.693822
apt	A0A0K4NHN8	Adenine phosphoribosyltransferase OS=Escherichia coli OX=562 GN=apt PE=3 SV=1 - [A0A0K4NHN8_ECOLX]	330.31	33.88	20	4	4	10	183	19.9467	5.41455	0.000192512	0.000311434	0.0440649	0.0147014	0.618147	-0.693978
nagK	A0A2A6Q9B0	N-acetyl-D-glucosamine kinase OS=Escherichia coli OX=562 GN=nagK PE=3 SV=1 - [A0A2A6Q9B0_ECOLX]	31.18	12.87	68	2	2	2	303	33.0396	5.64307	0.000189041	0.000305864	0.00107832	0.00180615	0.618057	-0.694187
rplE	A8A5B3	50S ribosomal protein L5 OS=Escherichia coli O9:H4 (strain HS) OX=331112 GN=rplE PE=3 SV=1 - [RL5_ECOHS]	5922.68	77.09	10	17	17	292	179	20.2887	9.48096	0.000188211	0.000304567	0.0308328	0.0119298	0.617962	-0.69441
ftsY	A0A0K4LZC5	Signal recognition particle receptor FtsY OS=Escherichia coli OX=562 GN=ftsY PE=3 SV=1 - [A0A0K4LZC5_ECOLX]	822.531	37.02	117	9	17	48	497	54.595	4.50049	0.000185968	0.000300982	0.0110721	0.0064027	0.617872	-0.694621
tatA	A0A2B7MAY1	Sec-independent protein translocase protein TatA OS=Escherichia coli OX=562 GN=tatA PE=3 SV=1 - [A0A2B7MAY1_ECOLX]	307.299	50.56	11	6	6	17	89	9.68607	6.0874	0.000188142	0.00030457	0.0402202	0.0139634	0.61773	-0.694952
xni	A0A0V9RI24	Flap endonuclease Xni OS=Escherichia coli OX=562 GN=xni PE=3 SV=1 - [A0A0V9RI24_ECOLX]	0	3.59	1	1	1	1	251	28.1014	6.85889	0.000204936	0.000331954	0.0104046	0.00615947	0.617362	-0.695811
mioC	A0A024KRM3	Flavodoxin OS=Escherichia coli D6-113.11 OX=1400022 GN=mioC PE=4 SV=1 - [A0A024KRM3_ECOLX]	69.34	16.33	29	1	1	1	147	15.8299	4.41162	0.000203141	0.000329077	0.0146889	0.00759016	0.617306	-0.695943
guaC	A0A0V9RC37	GMP reductase OS=Escherichia coli OX=562 GN=guaC PE=3 SV=1 - [A0A0V9RC37_ECOLX]	195.613	26.51	33	8	8	13	347	37.4028	6.3667	0.000192557	0.000311958	0.0007619	0.0015534	0.617252	-0.696068
trpR	B1LEK0	Trp operon repressor OS=Escherichia coli (strain SMS-3-5 / SECEC) OX=439855 GN=trpR PE=3 SV=1 - [TRPR_ECOSM]	258.572	57.41	19	5	5	10	108	12.3835	5.84619	0.000189016	0.000306332	0.0243794	0.0102702	0.617032	-0.696583
menB	A0A023KZH7	1,4-dihydroxy-2-naphthoyl-CoA synthase OS=Escherichia coli OX=562 GN=menB PE=3 SV=1 - [A0A023KZH7_ECOLX]	1274.48	44.56	22	10	11	54	285	31.5825	6.41748	0.000189236	0.000306698	0.00685821	0.00475992	0.617011	-0.696632
ECDEC1D_4416	H4JEC5	Glutamate decarboxylase alpha (Fragment) OS=Escherichia coli DEC1D OX=868136 GN=ECDEC1D_4416 PE=4 SV=1 - [H4JEC5_ECOLX]	5817.31	88.24	32	1	9	228	119	13.4548	5.2749	0.000191174	0.000309868	8.53382e-05	0.000513584	0.616954	-0.696766
BET08_26910	A0A1V2SV58	Uncharacterized protein (Fragment) OS=Escherichia coli OX=562 GN=BET08_26910 PE=4 SV=1 - [A0A1V2SV58_ECOLX]	98.4125	10.55	53	3	3	4	275	29.8818	5.78271	0.000181729	0.00029466	0.00529954	0.00409414	0.616743	-0.697258
ECW26_29640	I0VQW1	2-dehydropantoate 2-reductase OS=Escherichia coli W26 OX=1090926 GN=ECW26_29640 PE=3 SV=1 - [I0VQW1_ECOLX]	44.15	20	55	4	4	6	265	29.6862	5.56689	0.000189644	0.000307838	0.00355609	0.00337065	0.61605	-0.69888
yafD	A0A024KT77	UPF0294 protein YafD OS=Escherichia coli D6-113.11 OX=1400022 GN=yafD PE=3 SV=1 - [A0A024KT77_ECOLX]	91.4033	16.6	28	4	4	7	259	29.1083	9.40771	0.000181275	0.000294316	0.00425276	0.00364442	0.61592	-0.699185
BH694_01985	A0A061YD57	HTH-type transcriptional repressor AllR OS=Escherichia coli OX=562 GN=BH694_01985 PE=4 SV=1 - [A0A061YD57_ECOLX]	118.975	36.16	32	8	8	11	271	29.2943	6.13818	0.000188992	0.000306901	0.0121125	0.00676011	0.615806	-0.699451
nanE	A0A0G3KAI6	Putative N-acetylmannosamine-6-phosphate 2-epimerase OS=Escherichia coli PCN033 OX=1001989 GN=nanE PE=3 SV=1 - [A0A0G3KAI6_ECOLX]	123.487	15.72	28	4	4	6	229	24.0484	5.04639	0.000184465	0.000299644	0.0414961	0.0142085	0.615615	-0.699899
rluB	E9TF15	Pseudouridine synthase (Fragment) OS=Escherichia coli MS 117-3 OX=749539 GN=rluB PE=3 SV=1 - [E9TF15_ECOLX]	511.899	28.88	26	8	8	21	277	31.1496	9.93506	0.000185666	0.000301629	0.00760386	0.00505554	0.615545	-0.700064
BX06_21840	A0A027ZZD6	Uncharacterized protein OS=Escherichia coli O69:H11 str. 08-4661 OX=1446753 GN=BX06_21840 PE=4 SV=1 - [A0A027ZZD6_ECOLX]	42.4533	30.77	35	5	5	6	156	18.0095	9.1001	0.000185291	0.000301038	0.00288079	0.00304349	0.615506	-0.700155
yecM	A0A024KVY1	Uncharacterized protein OS=Escherichia coli D6-113.11 OX=1400022 GN=yecM PE=4 SV=1 - [A0A024KVY1_ECOLX]	155.377	29.79	30	1	4	8	188	21.1798	5.52881	0.000185567	0.000301497	0.030594	0.011873	0.615484	-0.700206
atpA	A0A1D3KH85	ATP synthase subunit alpha OS=Escherichia coli OX=562 GN=atpA PE=3 SV=1 - [A0A1D3KH85_ECOLX]	5216.7	45.03	3	1	20	173	513	55.1347	5.99854	0.00018	0.000292572	0.029432	0.0115919	0.61523	-0.700801
rplD	A0A024KYT6	50S ribosomal protein L4 OS=Escherichia coli OX=562 GN=rplD PE=3 SV=1 - [A0A024KYT6_ECOLX]	2516.65	53.81	6	9	9	91	197	21.6186	9.81787	0.000185529	0.000301847	0.00530611	0.00409721	0.614646	-0.702173
glmS	A0A029HFL8	Glutamine--fructose-6-phosphate aminotransferase [isomerizing] OS=Escherichia coli 2-005-03_S4_C3 OX=1444258 GN=glmS PE=3 SV=1 - [A0A029HFL8_ECOLX]	3096.62	60.43	51	12	27	126	609	66.8406	5.87158	0.000188256	0.000306286	0.0257452	0.0106418	0.61464	-0.702185
rpmF	A0A234Y1S0	50S ribosomal protein L32 OS=Escherichia coli OX=562 GN=rpmF PE=3 SV=1 - [A0A234Y1S0_ECOLX]	547.744	59.65	7	3	3	26	57	6.45543	11.0337	0.000186668	0.000303738	0.0194518	0.00899704	0.614569	-0.702354
HMPREF1589_04787	U9XMB3	Cytoplasmic chaperone TorD (Fragment) OS=Escherichia coli 113290 OX=1268976 GN=HMPREF1589_04787 PE=4 SV=1 - [U9XMB3_ECOLX]	251.317	20.88	44	3	3	11	182	20.5362	4.58936	0.000190353	0.00030974	0.000312486	0.00104306	0.614556	-0.702383
dnaA	I0VWZ2	Chromosomal replication initiator protein DnaA OS=Escherichia coli W26 OX=1090926 GN=dnaA PE=3 SV=1 - [I0VWZ2_ECOLX]	260.019	39.86	28	14	14	21	439	49.2056	8.92432	0.000188668	0.000307055	0.0153323	0.00778268	0.614444	-0.702646
rpsD	A0A024KR05	30S ribosomal protein S4 OS=Escherichia coli D6-113.11 OX=1400022 GN=rpsD PE=3 SV=1 - [A0A024KR05_ECOLX]	3766.63	60.89	14	13	13	180	202	22.9513	10.0229	0.000186345	0.000303306	0.0455367	0.0149827	0.61438	-0.702797
I3S_11050	A0A2S1ULY6	Acetylornithine deacetylase OS=Escherichia coli O121 str. RM8352 OX=1055543 GN=I3S_11050 PE=4 SV=1 - [A0A2S1ULY6_ECOLX]	193.141	32.9	10	1	9	13	383	42.3094	5.99854	0.000201318	0.000327996	0.0430772	0.0145103	0.613783	-0.704199
ECONIH1_24035	A0A0A1ABZ7	Uncharacterized protein OS=Escherichia coli OX=562 GN=ECONIH1_24035 PE=4 SV=1 - [A0A0A1ABZ7_ECOLX]	42.31	24.19	4	2	2	3	124	13.7742	8.1333	0.000192357	0.000313421	0.00320582	0.00320983	0.613732	-0.704319
rpsB	A0A2K4PDD5	30S ribosomal protein S2 OS=Escherichia coli OX=562 GN=rpsB PE=3 SV=1 - [A0A2K4PDD5_ECOLX]	3544.96	58.9	18	14	14	187	236	26.2376	7.13721	0.000185585	0.00030239	0.0346172	0.0128009	0.613729	-0.704327
gph	A0A0J2E0R9	Phosphoglycolate phosphatase OS=Escherichia coli OX=562 GN=gph PE=3 SV=1 - [A0A0J2E0R9_ECOLX]	167.745	26.98	62	5	5	13	252	27.3731	4.75439	0.000188076	0.000306484	0.0488805	0.0156009	0.613656	-0.704499
BMR23_00845	A0A2B7MQL2	Uncharacterized protein OS=Escherichia coli OX=562 GN=BMR23_00845 PE=4 SV=1 - [A0A2B7MQL2_ECOLX]	24.6	1.82	150	2	2	2	878	96.693	5.85889	0.000188515	0.000307327	0.00015923	0.000716634	0.613401	-0.705098
ycgL	A0A085NYB4	Protein YcgL OS=Escherichia coli OX=562 GN=ycgL PE=3 SV=1 - [A0A085NYB4_ECOLX]	256.348	65.98	31	6	6	15	97	11.2258	8.08936	0.000185402	0.000302253	0.00660853	0.00465964	0.613399	-0.705103
Q609_ECAC00085G0003	W1XDU1	Uncharacterized protein (Fragment) OS=Escherichia coli DORA_A_5_14_21 OX=1403943 GN=Q609_ECAC00085G0003 PE=4 SV=1 - [W1XDU1_ECOLX]	560.477	88.66	18	8	8	29	97	10.5096	8.1626	0.000184009	0.000300047	0.0435995	0.0146118	0.613269	-0.705407
sufB	A0A029HZL3	FeS assembly protein SufB OS=Escherichia coli 2-005-03_S4_C3 OX=1444258 GN=sufB PE=4 SV=1 - [A0A029HZL3_ECOLX]	865.042	41.01	24	2	14	40	495	54.6896	5.26221	0.000193497	0.00031557	0.0143341	0.00748101	0.613166	-0.70565
dinG_1	A0A1D3U1P6	Putative ATP-binding protein OS=Escherichia coli OX=562 GN=dinG_1 PE=4 SV=1 - [A0A1D3U1P6_ECOLX]	0	1.42	3	1	1	1	636	70.1965	6.84424	0.000187232	0.000305397	0.0341041	0.0126868	0.613078	-0.705857
ribB	A0A0C2EN47	3,4-dihydroxy-2-butanone 4-phosphate synthase OS=Escherichia coli OX=562 GN=ribB PE=3 SV=1 - [A0A0C2EN47_ECOLX]	178.645	15.21	22	3	3	10	217	23.3206	5.0083	0.000195703	0.000319259	0.0137806	0.00730629	0.61299	-0.706063
lacI	A0A094XSW9	Lac repressor OS=Escherichia coli OX=562 GN=lacI PE=4 SV=1 - [A0A094XSW9_ECOLX]	97.83	17.87	114	6	6	6	319	34.1028	6.53662	0.000195267	0.000318588	0.00718961	0.00488827	0.612915	-0.706241
AC16_5521	A0A070U4A8	Ecotin family protein (Fragment) OS=Escherichia coli 2-177-06_S3_C2 OX=1444151 GN=AC16_5521 PE=3 SV=1 - [A0A070U4A8_ECOLX]	610.628	68.12	46	9	9	37	138	15.7031	7.12256	0.000181397	0.000295978	0.000829166	0.00161585	0.612873	-0.70634
rplM	A0A136WX37	50S ribosomal protein L13 OS=Escherichia coli OX=562 GN=rplM PE=3 SV=1 - [A0A136WX37_ECOLX]	1045.85	65.49	10	10	10	88	142	15.9785	9.90576	0.000185784	0.000303297	0.0297234	0.0116632	0.61255	-0.707101
GJ11_06585	A0A193LQL6	3-oxoacyl-[acyl-carrier-protein] synthase 2 OS=Escherichia coli OX=562 GN=GJ11_06585 PE=3 SV=1 - [A0A193LQL6_ECOLX]	2088.87	53.51	23	6	13	67	413	43.0326	6.0874	0.000178226	0.00029101	0.0397875	0.0138787	0.612439	-0.707362
EADG_00709	A0A1X3IHW3	Protein YrbC OS=Escherichia coli E1114 OX=550691 GN=EADG_00709 PE=4 SV=1 - [A0A1X3IHW3_ECOLX]	1094.13	63.03	12	10	11	54	211	23.9645	9.36377	0.000183379	0.000299436	0.00690998	0.00478032	0.612415	-0.707418
BTQ04_01300	A0A192ESF7	Bifunctional PTS fructose transporter subunit IIA/HPr protein OS=Escherichia coli OX=562 GN=BTQ04_01300 PE=4 SV=1 - [A0A192ESF7_ECOLX]	597.903	57.45	59	2	14	27	376	39.6516	4.94482	0.000184596	0.000301456	0.0046696	0.00382612	0.612347	-0.707579
rpsR	B7MLK7	30S ribosomal protein S18 OS=Escherichia coli O45:K1 (strain S88 / ExPEC) OX=585035 GN=rpsR PE=3 SV=1 - [RS18_ECO45]	1898.46	40	1	3	3	72	75	8.98085	10.5942	0.000183392	0.000299589	0.00891418	0.00559112	0.612144	-0.708056
nlpE	B7MBH4	Lipoprotein involved with copper homeostasis and adhesion OS=Escherichia coli O45:K1 (strain S88 / ExPEC) OX=585035 GN=nlpE PE=4 SV=1 - [B7MBH4_ECO45]	231.971	40.25	62	9	9	18	236	25.7995	5.0083	0.000184581	0.000301608	0.00493933	0.00393596	0.61199	-0.708419
C1I57_03500	A0A2R9WFA2	Exodeoxyribonuclease V subunit gamma (Fragment) OS=Escherichia coli OX=562 GN=C1I57_03500 PE=3 SV=1 - [A0A2R9WFA2_ECOLX]	88.94	5.53	132	3	5	5	850	97.4174	5.03369	0.000185245	0.000302777	0.0219394	0.00966175	0.611821	-0.708818
hdfR	A0A1V2T5V3	HTH-type transcriptional regulator HdfR OS=Escherichia coli OX=562 GN=hdfR PE=3 SV=1 - [A0A1V2T5V3_ECOLX]	55.7056	15.27	43	4	4	7	275	31.2432	7.94287	0.000186403	0.000304816	0.0227834	0.00987657	0.611525	-0.709516
yqiC	A0A023KTP3	Membrane fusogenic activity OS=Escherichia coli OX=562 GN=yqiC PE=4 SV=1 - [A0A023KTP3_ECOLX]	376.884	64.65	47	2	7	34	99	11.4081	5.59229	0.000187176	0.000306233	0.0192691	0.00894569	0.611219	-0.710238
tgt	A0A028AH57	Queuine tRNA-ribosyltransferase OS=Escherichia coli O69:H11 str. 08-4661 OX=1446753 GN=tgt PE=3 SV=1 - [A0A028AH57_ECOLX]	91.15	18.67	23	7	7	10	375	42.5131	6.26514	0.000181351	0.000296759	0.00914189	0.00567807	0.611105	-0.710507
UMNK88_2656	A0A0E0U0C6	Iron-sulfur cluster carrier protein OS=Escherichia coli UMNK88 OX=696406 GN=UMNK88_2656 PE=3 SV=1 - [A0A0E0U0C6_ECOLX]	781.283	32.52	34	8	12	46	369	39.9246	6.30322	0.000187394	0.000306749	0.0485618	0.0155436	0.610902	-0.710987
BW70_16420	A0A026V917	Transcriptional repressor MprA OS=Escherichia coli O174:H8 str. 04-3038 OX=1446704 GN=BW70_16420 PE=4 SV=1 - [A0A026V917_ECOLX]	221.263	42.05	25	8	8	21	176	20.5783	6.41748	0.000184079	0.000301391	0.035802	0.0130591	0.610765	-0.711312
rplQ	D8E833	50S ribosomal protein L17 OS=Escherichia coli MS 119-7 OX=679206 GN=rplQ PE=3 SV=1 - [D8E833_ECOLX]	1384.33	47.22	10	7	7	73	108	12.0555	10.0669	0.00018606	0.000305021	0.00427277	0.00365339	0.609991	-0.713141
BMR23_19095	A0A2B7LSY2	Peptidyl-prolyl cis-trans isomerase OS=Escherichia coli OX=562 GN=BMR23_19095 PE=3 SV=1 - [A0A2B7LSY2_ECOLX]	1918.2	56.3	12	1	14	82	270	28.9542	8.47021	0.000187534	0.000307544	0.0123263	0.00683048	0.609779	-0.713641
pntA	A0A024KWN5	NAD(P) transhydrogenase subunit alpha OS=Escherichia coli D6-113.11 OX=1400022 GN=pntA PE=3 SV=1 - [A0A024KWN5_ECOLX]	1060.77	47.06	77	18	18	47	510	54.5676	5.8335	0.000185149	0.000303906	0.0390036	0.0137232	0.609233	-0.714934
rplI	A7ZV74	50S ribosomal protein L9 OS=Escherichia coli O139:H28 (strain E24377A / ETEC) OX=331111 GN=rplI PE=3 SV=1 - [RL9_ECO24]	3478.96	74.5	4	12	12	161	149	15.7595	6.58057	0.000185289	0.000304215	0.00477121	0.00386822	0.609073	-0.715313
rpsJ	A0A077K5Q0	30S ribosomal protein S10 OS=Escherichia coli O157 OX=1045010 GN=rpsJ PE=3 SV=1 - [A0A077K5Q0_ECOLX]	1782.53	55.34	4	5	5	49	103	11.6854	9.31982	0.000185453	0.000304628	0.0402225	0.0139638	0.608786	-0.715993
yhcC	A0A0H2VDW2	Uncharacterized protein OS=Escherichia coli O6:H1 (strain CFT073 / ATCC 700928 / UPEC) OX=199310 GN=yhcC PE=4 SV=1 - [A0A0H2VDW2_ECOL6]	42.22	3.47	56	1	1	1	288	32.0231	7.50342	0.000201846	0.00033158	0.0152158	0.00774832	0.60874	-0.716101
rplA	A8A783	50S ribosomal protein L1 OS=Escherichia coli O9:H4 (strain HS) OX=331112 GN=rplA PE=3 SV=1 - [RL1_ECOHS]	7819.17	76.92	13	18	18	259	234	24.7143	9.64209	0.000184565	0.000303259	0.0300924	0.0117527	0.608604	-0.716425
AL530_014035	A0A061KV83	Aldo/keto reductase OS=Escherichia coli OX=562 GN=AL530_014035 PE=4 SV=1 - [A0A061KV83_ECOLX]	18.9	7.04	74	2	2	2	284	30.9588	6.04932	0.000189668	0.000311651	0.00455055	0.00377564	0.608592	-0.716453
EL75_2978	A0A0A0GTX1	Outer membrane protein X OS=Escherichia coli OX=562 GN=EL75_2978 PE=4 SV=1 - [A0A0A0GTX1_ECOLX]	6784.5	69.47	14	8	8	287	131	14.75	6.06201	0.000184928	0.000303865	0.00379453	0.00347066	0.608586	-0.716467
yhcM	A0A024L992	Cell division protein ZapE OS=Escherichia coli OX=562 GN=yhcM PE=3 SV=1 - [A0A024L992_ECOLX]	120.914	9.07	103	3	3	4	375	43.0621	6.80029	0.000189147	0.000310874	0.0343951	0.0127517	0.608435	-0.716824
A9819_18330	A0A163F4S1	ABC transporter ATP-binding protein OS=Escherichia coli OX=562 GN=A9819_18330 PE=4 SV=1 - [A0A163F4S1_ECOLX]	318.38	38.29	10	1	6	13	269	29.0781	6.88818	0.000175357	0.000288215	0.00844559	0.0054067	0.608425	-0.716848
mobA	A0A2D0NXD7	Molybdenum cofactor guanylyltransferase OS=Escherichia coli O127:H6 OX=168807 GN=mobA PE=3 SV=1 - [A0A2D0NXD7_ECOLX]	48.05	13.61	17	2	2	2	191	21.416	6.52197	0.000183073	0.000300963	0.0350126	0.0128878	0.60829	-0.717169
C1I57_33935	A0A2R9VZ51	Aldo/keto reductase (Fragment) OS=Escherichia coli OX=562 GN=C1I57_33935 PE=4 SV=1 - [A0A2R9VZ51_ECOLX]	27.63	25	1	1	1	1	48	5.23581	4.64014	0.000181367	0.000298178	0.000819802	0.00160748	0.608249	-0.717267
Q609_ECAC02904G0001	W1VVZ3	Pyrimidine-specific ribonucleoside hydrolase RihA (Fragment) OS=Escherichia coli DORA_A_5_14_21 OX=1403943 GN=Q609_ECAC02904G0001 PE=3 SV=1 - [W1VVZ3_ECOLX]	57.0993	11.54	5	1	2	4	208	23.2267	5.10986	0.000175183	0.000288021	0.0125454	0.0069016	0.608231	-0.717308
HMPREF9350_06061	E6BUD4	Glutamate decarboxylase OS=Escherichia coli MS 85-1 OX=679202 GN=HMPREF9350_06061 PE=3 SV=1 - [E6BUD4_ECOLX]	13214.8	74.29	16	1	16	483	319	35.856	5.17334	0.000179258	0.0002951	0.0228446	0.00989188	0.60745	-0.719163
rplY	B7MXK1	50S ribosomal protein L25 OS=Escherichia coli O81 (strain ED1a) OX=585397 GN=rplY PE=3 SV=1 - [RL25_ECO81]	1917.71	68.09	15	8	8	115	94	10.6858	9.59814	0.000183475	0.000302081	0.0313714	0.0120565	0.607371	-0.719351
Q609_ECAC02283G0001	W1WDJ8	RNase E specificity factor CsrD (Fragment) OS=Escherichia coli DORA_A_5_14_21 OX=1403943 GN=Q609_ECAC02283G0001 PE=4 SV=1 - [W1WDJ8_ECOLX]	0	4.3	1	1	1	1	186	20.7099	8.74854	0.000177723	0.00029271	0.0129973	0.00704937	0.607165	-0.719839
nudJ	A0A073HLJ0	Phosphatase NudJ OS=Escherichia coli 5-366-08_S1_C3 OX=1444102 GN=nudJ PE=3 SV=1 - [A0A073HLJ0_ECOLX]	307.862	42.48	33	5	5	15	153	17.4177	5.13525	0.000180935	0.000298069	0.0041623	0.00361188	0.607025	-0.720171
BET08_18500	A0A1V2T5F7	dTDP-glucose 4,6-dehydratase OS=Escherichia coli OX=562 GN=BET08_18500 PE=3 SV=1 - [A0A1V2T5F7_ECOLX]	93.09	25.74	78	6	7	9	338	38.0749	5.74463	0.000183507	0.000302358	0.000253641	0.000932372	0.606921	-0.720419
rplC	B7L4K9	50S ribosomal protein L3 OS=Escherichia coli (strain 55989 / EAEC) OX=585055 GN=rplC PE=3 SV=1 - [RL3_ECO55]	4022.49	71.29	12	14	14	142	209	22.2298	9.90576	0.000183009	0.000301598	0.0320384	0.0122133	0.606799	-0.720709
tktA	Q8XCY2	Transketolase OS=Escherichia coli O157:H7 OX=83334 GN=tktA PE=3 SV=2 - [Q8XCY2_ECO57]	2934.8	46.15	98	1	26	168	663	72.1609	5.73193	0.000184708	0.000304398	0.0189944	0.00886782	0.606798	-0.720712
leuS	A0A1D3KEM1	Leucine--tRNA ligase OS=Escherichia coli OX=562 GN=leuS PE=3 SV=1 - [A0A1D3KEM1_ECOLX]	1507.75	32.56	3	1	27	84	860	96.9642	5.23682	0.000174119	0.000286976	0.0236837	0.0100995	0.606738	-0.720854
helD	A0A085P3T6	DNA helicase OS=Escherichia coli OX=562 GN=helD PE=3 SV=1 - [A0A085P3T6_ECOLX]	217.003	25.15	108	14	15	20	684	77.9225	8.26514	0.000186244	0.00030726	0.000101608	0.000568047	0.606144	-0.722267
kbl	A0A1X3KAA8	2-amino-3-ketobutyrate coenzyme A ligase OS=Escherichia coli H605 OX=656410 GN=kbl PE=3 SV=1 - [A0A1X3KAA8_ECOLX]	1764.47	45.98	14	1	13	73	398	43.0878	5.97314	0.000180453	0.000297782	0.0136106	0.00725153	0.605991	-0.722632
rcnB	A0A024L1U2	Heavy metal resistance protein OS=Escherichia coli OX=562 GN=rcnB PE=4 SV=1 - [A0A024L1U2_ECOLX]	66.1367	36.61	35	4	4	10	112	12.4863	7.48877	0.000185647	0.000306695	0.010887	0.00633639	0.605316	-0.724239
rplL	A0A0T5XQ44	50S ribosomal protein L7/L12 OS=Escherichia coli OX=562 GN=rplL PE=3 SV=1 - [A0A0T5XQ44_ECOLX]	1121.71	53.72	2	1	8	77	121	12.2615	4.65283	0.000178272	0.00029455	0.014058	0.00739454	0.605235	-0.724433
HMPREF3040_02430	A0A148HVC2	Uncharacterized protein OS=Escherichia coli OX=562 GN=HMPREF3040_02430 PE=4 SV=1 - [A0A148HVC2_ECOLX]	39.05	6.09	2	1	1	1	115	12.3981	7.25439	0.000204424	0.000338264	0.0261919	0.010762	0.604334	-0.726582
ycfH	A0A024KUX4	Uncharacterized protein OS=Escherichia coli D6-113.11 OX=1400022 GN=ycfH PE=4 SV=1 - [A0A024KUX4_ECOLX]	277.893	33.21	37	8	8	19	265	29.8041	5.41455	0.000178486	0.000295349	0.0044746	0.00374277	0.604321	-0.726614
AUQ13_23285	A0A1S0WMU8	Malonyl CoA-acyl carrier protein transacylase OS=Escherichia coli OX=562 GN=AUQ13_23285 PE=3 SV=1 - [A0A1S0WMU8_ECOLX]	2181.53	60.52	43	4	12	70	309	32.4124	5.03369	0.000181495	0.000300341	0.023281	0.0100001	0.604295	-0.726674
dksA	P0ABS3	RNA polymerase-binding transcription factor DksA OS=Escherichia coli O157:H7 OX=83334 GN=dksA PE=3 SV=1 - [DKSA_ECO57]	470.004	47.68	7	4	4	23	151	17.5167	5.12256	0.000181845	0.000300991	0.0294131	0.0115873	0.604155	-0.727009
pdxH	Q0THJ0	Pyridoxine/pyridoxamine 5'-phosphate oxidase OS=Escherichia coli O6:K15:H31 (strain 536 / UPEC) OX=362663 GN=pdxH PE=3 SV=1 - [PDXH_ECOL5]	323.074	61.01	36	12	12	25	218	25.5872	8.92432	0.000186057	0.000308078	0.035517	0.0129977	0.603928	-0.727551
clbF	Q0P7J6	Acyl-CoA dehydrogenase OS=Escherichia coli OX=562 GN=clbF PE=3 SV=1 - [Q0P7J6_ECOLX]	83.3967	15.96	3	5	5	7	376	41.167	6.88818	0.000192996	0.000319618	0.0147531	0.00760968	0.603833	-0.727779
BH694_00345	A0A061KPZ1	DNA-binding transcriptional repressor DeoR OS=Escherichia coli OX=562 GN=BH694_00345 PE=4 SV=1 - [A0A061KPZ1_ECOLX]	35.65	13.1	33	3	3	8	252	28.5436	7.69385	0.000176745	0.000292723	0.00583846	0.00433635	0.603796	-0.727866
purM	A0A2D0P468	Phosphoribosylformylglycinamidine cyclo-ligase OS=Escherichia coli O127:H6 OX=168807 GN=purM PE=3 SV=1 - [A0A2D0P468_ECOLX]	118.668	20.2	72	4	4	9	307	32.8085	4.79248	0.000187137	0.000310026	0.00562592	0.00424309	0.603618	-0.728293
rpsO	A0A2K3TX98	30S ribosomal protein S15 OS=Escherichia coli OX=562 GN=rpsO PE=3 SV=1 - [A0A2K3TX98_ECOLX]	308.864	59.55	7	1	4	17	89	10.2785	10.4038	0.000179404	0.000297481	0.0203474	0.0092432	0.603078	-0.729585
ECW26_02170	I0VYP2	Lipoate--protein ligase OS=Escherichia coli W26 OX=1090926 GN=ECW26_02170 PE=3 SV=1 - [I0VYP2_ECOLX]	103.583	12.85	87	4	4	6	319	35.621	6.3667	0.000184786	0.000306444	0.000973062	0.00173269	0.603002	-0.729765
ygfA	B7MM97	5-formyltetrahydrofolate cyclo-ligase OS=Escherichia coli O45:K1 (strain S88 / ExPEC) OX=585035 GN=ygfA PE=3 SV=1 - [B7MM97_ECO45]	15.66	4.95	1	1	1	1	182	21.1509	7.60596	0.00018569	0.000307954	0.0025217	0.00283717	0.602979	-0.729819
holA	A0A029IBJ6	DNA polymerase III, delta subunit OS=Escherichia coli 2-005-03_S4_C3 OX=1444258 GN=holA PE=4 SV=1 - [A0A029IBJ6_ECOLX]	50.0663	13.82	74	4	4	5	340	38.3232	6.80029	0.000183236	0.000304032	0.0289431	0.0114711	0.602687	-0.730518
C1N95_020125	A0A2P6HND5	Translational GTPase TypA (Fragment) OS=Escherichia coli OX=562 GN=C1N95_020125 PE=4 SV=1 - [A0A2P6HND5_ECOLX]	1128.6	35.91	24	17	17	58	582	64.2578	5.08447	0.000183423	0.000304385	0.0276564	0.0111458	0.6026	-0.730728
ycaR	B7M846	UPF0434 protein YcaR OS=Escherichia coli O8 (strain IAI1) OX=585034 GN=ycaR PE=3 SV=1 - [YCAR_ECO8A]	221.72	68.33	9	5	5	13	60	6.85053	5.0083	0.000178782	0.000296729	0.000919807	0.00169187	0.60251	-0.730943
AZZ83_002713	A0A192ERS2	Lipoprotein YfhM OS=Escherichia coli OX=562 GN=AZZ83_002713 PE=4 SV=1 - [A0A192ERS2_ECOLX]	623.808	27.89	175	4	35	51	1653	181.322	5.42725	0.000187084	0.000310575	0.00334928	0.00327784	0.602378	-0.731258
pabC	A0A0H2V696	4-amino-4-deoxychorismate lyase OS=Escherichia coli O6:H1 (strain CFT073 / ATCC 700928 / UPEC) OX=199310 GN=pabC PE=3 SV=1 - [A0A0H2V696_ECOL6]	39.23	14.62	67	4	4	4	260	28.9767	7.66455	0.000174403	0.000289533	0.0154508	0.00781738	0.602359	-0.731304
glnA	A0A029HEN2	Glutamine synthetase OS=Escherichia coli 2-005-03_S4_C3 OX=1444258 GN=glnA PE=3 SV=1 - [A0A029HEN2_ECOLX]	1018.75	42.43	34	15	15	62	469	51.9027	5.46533	0.000183183	0.000304178	0.0432442	0.0145429	0.602222	-0.731633
COD30_31490	A0A2A3UIZ5	Integrase (Fragment) OS=Escherichia coli OX=562 GN=COD30_31490 PE=3 SV=1 - [A0A2A3UIZ5_ECOLX]	72.909	14.33	170	2	4	5	335	38.206	9.70068	0.00018559	0.000308264	0.00127647	0.001967	0.60205	-0.732044
ybaB	B7UKF1	Nucleoid-associated protein YbaB OS=Escherichia coli O127:H6 (strain E2348/69 / EPEC) OX=574521 GN=ybaB PE=3 SV=1 - [YBAB_ECO27]	1530.41	82.57	13	6	6	55	109	12.0069	5.07178	0.000181643	0.000301818	0.0386072	0.0136435	0.601831	-0.732571
rho	A0A2I6FKP6	Transcription termination factor Rho OS=Escherichia coli OX=562 GN=rho PE=3 SV=1 - [A0A2I6FKP6_ECOLX]	2436.79	71.84	17	27	27	129	419	46.9646	7.25439	0.000180322	0.000299712	0.00611831	0.00445489	0.60165	-0.733003
EAZG_01148	A0A1X3LWS5	Fumarylacetoacetate (FAA) hydrolase family protein OS=Escherichia coli TA249 OX=656441 GN=EAZG_01148 PE=4 SV=1 - [A0A1X3LWS5_ECOLX]	162.154	42.7	35	7	7	10	185	20.3543	6.87354	0.000177215	0.000294597	0.0415459	0.0142179	0.60155	-0.733244
ECW26_23960	I0VSJ5	Amino acid permease-associated region OS=Escherichia coli W26 OX=1090926 GN=ECW26_23960 PE=4 SV=1 - [I0VSJ5_ECOLX]	38.66	3.46	24	1	1	3	434	48.017	8.44092	0.000173284	0.000288259	0.000595716	0.00141396	0.601139	-0.73423
AWP75_04490	A0A1Q6BF79	Nickel ABC transporter, nickel/metallophore periplasmic binding protein OS=Escherichia coli OX=562 GN=AWP75_04490 PE=4 SV=1 - [A0A1Q6BF79_ECOLX]	565.367	29.01	4	1	13	37	524	58.6921	6.01123	0.000179022	0.00029783	0.0245005	0.0102995	0.601087	-0.734353
ERYG_04896	A0A0K9T757	Glutamate decarboxylase alpha (Fragment) OS=Escherichia coli M114 OX=656416 GN=ERYG_04896 PE=3 SV=1 - [A0A0K9T757_ECOLX]	11978.7	69.26	34	1	13	369	257	28.7464	5.14795	0.000175201	0.000291587	0.0234299	0.0100366	0.600854	-0.734913
bglX	A0A0J2EFQ6	Periplasmic beta-glucosidase OS=Escherichia coli OX=562 GN=bglX PE=3 SV=1 - [A0A0J2EFQ6_ECOLX]	830.58	43.71	99	1	29	50	755	82.4209	5.98584	0.000185585	0.000309029	0.0408907	0.014093	0.600542	-0.735663
yeeN	A0A023YZN9	Probable transcriptional regulatory protein YeeN OS=Escherichia coli O145:H28 str. RM12581 OX=1248823 GN=yeeN PE=3 SV=1 - [A0A023YZN9_ECOLX]	324.23	37.39	36	7	7	18	238	25.8812	4.81787	0.000187358	0.000312071	0.00136083	0.00204169	0.600369	-0.73608
rplW	A0A077K6R8	50S ribosomal protein L23 OS=Escherichia coli O115 OX=1450173 GN=rplW PE=3 SV=1 - [A0A077K6R8_ECOLX]	814.744	55	5	6	6	40	100	11.1391	9.70068	0.000179519	0.000299039	0.00399197	0.00354832	0.600322	-0.736193
ECW26_13550	I0VVC0	Biosynthetic peptidoglycan transglycosylase OS=Escherichia coli W26 OX=1090926 GN=ECW26_13550 PE=3 SV=1 - [I0VVC0_ECOLX]	85.15	6.32	53	1	1	1	174	19.6162	9.48096	0.00017931	0.000298814	0.0223221	0.00976	0.600071	-0.736794
thrB	Q68QR9	Homoserine kinase (Fragment) OS=Escherichia coli OX=562 GN=thrB PE=3 SV=1 - [Q68QR9_ECOLX]	43.98	5.96	85	2	2	2	285	31.0936	5.47803	0.000190449	0.000317413	0.0314906	0.0120844	0.600003	-0.736958
ECW26_18990	I0VTV2	Fructose-1-phosphatase OS=Escherichia coli W26 OX=1090926 GN=ECW26_18990 PE=4 SV=1 - [I0VTV2_ECOLX]	59.6934	37.29	35	4	4	6	177	19.427	6.12549	0.000178426	0.000297594	0.0100759	0.0060354	0.599562	-0.738019
gyrA	T1WGR2	DNA gyrase subunit A (Fragment) OS=Escherichia coli OX=562 GN=gyrA PE=4 SV=1 - [T1WGR2_ECOLX]	153.277	49.21	7	1	3	6	63	6.93848	8.51416	0.000193102	0.000322144	0.00385302	0.00349413	0.599428	-0.738341
clpB	I0VTT5	Chaperone protein ClpB OS=Escherichia coli W26 OX=1090926 GN=clpB PE=3 SV=1 - [I0VTT5_ECOLX]	12225.9	73.03	62	3	55	507	823	91.6559	5.46533	0.00017749	0.00029612	0.00619279	0.00448566	0.599386	-0.738443
rihC	A0A066SP86	Non-specific ribonucleoside hydrolase RihC OS=Escherichia coli OX=562 GN=rihC PE=3 SV=1 - [A0A066SP86_ECOLX]	27.03	10.2	86	1	3	5	304	32.5887	5.30029	0.000185513	0.000309711	0.00191058	0.00244605	0.598989	-0.7394
fruK	A0A0K3QBV3	Phosphofructokinase OS=Escherichia coli OX=562 GN=fruK PE=3 SV=1 - [A0A0K3QBV3_ECOLX]	228.723	36.22	24	10	10	19	312	33.8034	5.73193	0.000180457	0.000301288	0.0153244	0.00778034	0.598953	-0.739486
secD	A0A0D6I4T5	Protein translocase subunit SecD OS=Escherichia coli OX=562 GN=secD PE=3 SV=1 - [A0A0D6I4T5_ECOLX]	556.281	30.96	32	16	17	37	604	65.0999	8.00146	0.000184959	0.000308861	0.0434419	0.0145813	0.598843	-0.739751
BMR23_06320	A0A2B7LX21	Riboflavin biosynthesis protein RibD OS=Escherichia coli OX=562 GN=BMR23_06320 PE=3 SV=1 - [A0A2B7LX21_ECOLX]	156.894	22.62	1	1	7	17	367	40.3468	7.60596	0.00019654	0.000328271	0.00616741	0.00447521	0.598712	-0.740067
AL530_025490	A0A178SXN4	DUF4102 domain-containing protein OS=Escherichia coli OX=562 GN=AL530_025490 PE=3 SV=1 - [A0A178SXN4_ECOLX]	66.77	7.86	13	2	3	4	420	48.005	9.49561	0.000184759	0.000308716	0.000138644	0.0006707	0.598476	-0.740635
ECW26_43430	I0VLX9	Protease 4 OS=Escherichia coli W26 OX=1090926 GN=ECW26_43430 PE=3 SV=1 - [I0VLX9_ECOLX]	185.99	13.13	110	6	6	6	594	63.9596	5.73193	0.000186569	0.000311776	0.00822212	0.00531604	0.598408	-0.740799
C1I57_30495	A0A2R9W0W3	Glutamate decarboxylase (Fragment) OS=Escherichia coli OX=562 GN=C1I57_30495 PE=3 SV=1 - [A0A2R9W0W3_ECOLX]	22386.6	78.96	87	1	24	843	423	47.6846	5.43994	0.000182208	0.000304514	0.000752558	0.00154661	0.598356	-0.740924
ygbF	D7ZCG8	Tol-pal system protein YbgF (Fragment) OS=Escherichia coli MS 69-1 OX=749531 GN=ygbF PE=3 SV=1 - [D7ZCG8_ECOLX]	747.336	62.67	52	11	11	34	225	24.3641	7.2251	0.00017871	0.000298725	0.0142169	0.00744448	0.598242	-0.741199
metH	A0A0T5XM69	Methionine synthase OS=Escherichia coli OX=562 GN=metH PE=4 SV=1 - [A0A0T5XM69_ECOLX]	163.25	7.17	1	1	9	12	1227	135.691	5.021	0.000170732	0.000285429	0.0272479	0.0110402	0.598158	-0.7414
malF	A0A0V9G5A0	Maltose transporter OS=Escherichia coli OX=562 GN=malF PE=4 SV=1 - [A0A0V9G5A0_ECOLX]	56.53	7.97	69	3	3	3	464	51.4178	8.85107	0.000183129	0.000306165	0.028121	0.0112645	0.598137	-0.741453
yfcD	A0A1D3U0N2	NUDIX hydrolase OS=Escherichia coli OX=562 GN=yfcD PE=4 SV=1 - [A0A1D3U0N2_ECOLX]	104.927	25.14	3	1	3	6	183	20.7578	4.60205	0.000179503	0.000300163	0.0105106	0.00619886	0.598019	-0.741737
htpX	I0VLI7	Protease HtpX OS=Escherichia coli W26 OX=1090926 GN=htpX PE=3 SV=1 - [I0VLI7_ECOLX]	317.209	27.96	26	6	6	21	279	30.3496	6.80029	0.000179886	0.000301154	0.00507049	0.00398722	0.597322	-0.74342
AC28_4792	A0A080I6R1	Outer membrane lipoprotein Blc OS=Escherichia coli 1-250-04_S3_C2 OX=1444163 GN=AC28_4792 PE=3 SV=1 - [A0A080I6R1_ECOLX]	415.544	61.02	33	3	12	28	177	19.9291	8.41162	0.00017884	0.000299634	0.0175969	0.00845757	0.596863	-0.744529
C6986_14205	A0A2T1MXD0	ABC transporter substrate-binding protein (Fragment) OS=Escherichia coli OX=562 GN=C6986_14205 PE=4 SV=1 - [A0A2T1MXD0_ECOLX]	65.0212	9.9	139	5	5	5	515	59.3489	8.6167	0.000182583	0.000305932	0.0215405	0.00955782	0.59681	-0.744657
rnr	A0A066SQG0	Ribonuclease R OS=Escherichia coli OX=562 GN=rnr PE=3 SV=1 - [A0A066SQG0_ECOLX]	1456.98	42.8	79	33	33	93	813	92.0735	8.6167	0.000180803	0.00030304	0.0149318	0.00766365	0.596632	-0.745086
mlaD	H4JDI4	Putative phospholipid ABC transporter-binding protein mlaD OS=Escherichia coli DEC1D OX=868136 GN=mlaD PE=4 SV=1 - [H4JDI4_ECOLX]	389.703	56.9	23	8	8	15	174	18.4375	4.80518	0.000176764	0.000296549	0.00656605	0.00464226	0.596069	-0.746449
BXT93_19660	A0A1V2GBR4	UDP-N-acetylmuramoyl-tripeptide--D-alanyl-D-alanine ligase (Fragment) OS=Escherichia coli OX=562 GN=BXT93_19660 PE=3 SV=1 - [A0A1V2GBR4_ECOLX]	183.074	9.9	75	1	4	8	414	43.3765	5.80811	0.000177457	0.00029781	0.00419632	0.00362422	0.595871	-0.746928
rbn	A0A061L3D3	Ribonuclease BN OS=Escherichia coli OX=562 GN=rbn PE=3 SV=1 - [A0A061L3D3_ECOLX]	34.66	15.41	81	4	4	5	305	32.9748	6.21436	0.000179088	0.000300602	0.0261442	0.0107492	0.595765	-0.747184
C1I57_25455	A0A2R9W3W6	Primosomal replication protein N (Fragment) OS=Escherichia coli OX=562 GN=C1I57_25455 PE=4 SV=1 - [A0A2R9W3W6_ECOLX]	43.55	10.81	54	1	1	1	74	9.09197	11.356	0.000174928	0.000293733	0.00248223	0.00281308	0.595535	-0.747742
rpsE	A0A2T1LEP9	30S ribosomal protein S5 OS=Escherichia coli OX=562 GN=rpsE PE=4 SV=1 - [A0A2T1LEP9_ECOLX]	1973.04	51.5	2	1	8	130	167	17.6504	10.272	0.000166899	0.000280276	0.00603963	0.00442204	0.59548	-0.747874
metK	A0A2S7HHL4	Methionine adenosyltransferase (Fragment) OS=Escherichia coli OX=562 GN=metK PE=4 SV=1 - [A0A2S7HHL4_ECOLX]	183.182	49.53	6	1	9	17	212	23.1639	5.89697	0.000187547	0.000314966	0.000488925	0.00129735	0.595453	-0.747941
glpX	A0A2S1UW26	Fructose-bisphosphatase class II OS=Escherichia coli O121 str. RM8352 OX=1055543 GN=glpX PE=4 SV=1 - [A0A2S1UW26_ECOLX]	420.783	44.35	11	14	14	29	336	35.8286	5.63037	0.000180758	0.000303593	0.0369367	0.0133	0.595395	-0.74808
chaB	A0A0F3U3L9	Cation transport regulator OS=Escherichia coli OX=562 GN=chaB PE=4 SV=1 - [A0A0F3U3L9_ECOLX]	190.937	63.16	25	6	6	15	76	8.93841	8.35303	0.000182298	0.000306327	0.0042523	0.00364426	0.59511	-0.748771
ratA	A0A029IMC1	Ribosome association toxin RatA OS=Escherichia coli 2-005-03_S4_C2 OX=1444228 GN=ratA PE=4 SV=1 - [A0A029IMC1_ECOLX]	35.25	17.24	8	1	2	3	145	16.1973	8.45557	0.000183092	0.000307839	0.0221124	0.00970633	0.594764	-0.749611
C6985_10090	A0A2T1LKX6	50S ribosomal protein L35 OS=Escherichia coli OX=562 GN=C6985_10090 PE=4 SV=1 - [A0A2T1LKX6_ECOLX]	34.02	20	3	1	1	1	65	7.21627	11.9126	0.00017341	0.000292221	0.0164264	0.00810793	0.593421	-0.752872
trpD	A0A0K9T9A9	Anthranilate phosphoribosyltransferase OS=Escherichia coli M114 OX=656416 GN=trpD PE=3 SV=1 - [A0A0K9T9A9_ECOLX]	0	2.26	3	1	1	1	531	56.8903	6.52197	0.000178548	0.000300912	0.0390935	0.0137412	0.593354	-0.753035
AC93_1204	A0A029IWZ4	Uncharacterized protein OS=Escherichia coli 2-005-03_S4_C2 OX=1444228 GN=AC93_1204 PE=4 SV=1 - [A0A029IWZ4_ECOLX]	191.865	19.22	87	4	4	8	307	33.7502	7.07861	0.000179995	0.000303527	0.0429356	0.0144826	0.59301	-0.753871
rpmB	B7MFJ8	50S ribosomal protein L28 OS=Escherichia coli O45:K1 (strain S88 / ExPEC) OX=585035 GN=rpmB PE=3 SV=1 - [RL28_ECO45]	417.628	64.1	8	7	7	37	78	9.00087	11.4146	0.000174443	0.000294284	0.0115229	0.00656069	0.592771	-0.754452
rstA	A0A086VU91	DNA-binding response regulator OS=Escherichia coli OX=562 GN=rstA PE=4 SV=1 - [A0A086VU91_ECOLX]	99.6622	20.92	71	5	5	7	239	26.673	5.65576	0.000180173	0.000303981	0.00977515	0.0059193	0.592713	-0.754594
fabF_2	A0A1D3KC52	3-oxoacyl-[acyl-carrier-protein] synthase 2 OS=Escherichia coli OX=562 GN=fabF_2 PE=3 SV=1 - [A0A1D3KC52_ECOLX]	1309.14	32.2	1	1	8	45	413	42.8324	5.8208	0.000187448	0.000316393	0.0125481	0.00690248	0.592455	-0.755222
Q610_ECBC00215G0002	W1V224	Uncharacterized protein (Fragment) OS=Escherichia coli DORA_B_14 OX=1403944 GN=Q610_ECBC00215G0002 PE=4 SV=1 - [W1V224_ECOLX]	33.84	37.93	86	2	2	2	58	6.55755	4.88135	0.000175044	0.000295505	0.00815487	0.0052884	0.592356	-0.755463
fucU	A0A193LWC3	L-fucose mutarotase OS=Escherichia coli OX=562 GN=fucU PE=3 SV=1 - [A0A193LWC3_ECOLX]	622.134	52.55	14	5	5	33	137	15.166	5.85889	0.000173483	0.000292995	0.0330837	0.0124558	0.592103	-0.75608
maeA	H4KG99	NAD-dependent malic enzyme OS=Escherichia coli DEC2C OX=868140 GN=maeA PE=3 SV=1 - [H4KG99_ECOLX]	1732.31	48.06	25	1	20	92	541	60.3637	5.23682	0.000186244	0.000314732	0.000333507	0.00107782	0.591754	-0.75693
ygiC	A0A024KNE2	Uncharacterized protein OS=Escherichia coli D6-113.11 OX=1400022 GN=ygiC PE=4 SV=1 - [A0A024KNE2_ECOLX]	264.597	17.62	46	7	7	17	386	44.9632	4.76709	0.000177214	0.000299474	0.0047564	0.00386214	0.591749	-0.756943
serC	A0A1Q4PET1	Phosphoserine aminotransferase OS=Escherichia coli OX=562 GN=serC PE=3 SV=1 - [A0A1Q4PET1_ECOLX]	1989.56	55.52	3	2	17	101	362	39.8141	5.92236	0.000179817	0.00030416	0.0244798	0.0102945	0.591191	-0.758303
hypE	B7MKK1	Carbamoyl phosphate phosphatase, hydrogenase 3 maturation protein OS=Escherichia coli O45:K1 (strain S88 / ExPEC) OX=585035 GN=hypE PE=4 SV=1 - [B7MKK1_ECO45]	268.022	27.95	61	8	8	16	322	33.6636	5.09717	0.000180973	0.000306207	0.0241126	0.0102052	0.591015	-0.758735
rpsP	B7MIU7	30S ribosomal protein S16 OS=Escherichia coli O45:K1 (strain S88 / ExPEC) OX=585035 GN=rpsP PE=3 SV=1 - [RS16_ECO45]	670.593	52.44	6	5	5	46	82	9.18495	10.5503	0.000179539	0.000304063	0.0229169	0.00990995	0.590468	-0.76007
trpD2	A0A0K4LYQ3	Putative glycosyl transferase OS=Escherichia coli OX=562 GN=trpD2 PE=4 SV=1 - [A0A0K4LYQ3_ECOLX]	248.973	30.94	1	1	7	21	320	35.1661	6.7417	0.000176188	0.000298454	0.00204427	0.00252706	0.590336	-0.760392
yegQ	A0A024L175	Uncharacterized protein OS=Escherichia coli OX=562 GN=yegQ PE=4 SV=1 - [A0A024L175_ECOLX]	55.9621	16.56	54	5	5	7	453	51.1315	6.0874	0.000179483	0.00030428	0.0409053	0.0140958	0.589864	-0.761546
rpsH	A0A1D3KF66	30S ribosomal protein S8 OS=Escherichia coli OX=562 GN=rpsH PE=3 SV=1 - [A0A1D3KF66_ECOLX]	3003.6	73.08	8	12	12	149	130	14.0895	9.39307	0.000179594	0.000304526	0.0255549	0.0105903	0.589749	-0.761826
polA	A0A0K3WWL8	DNA polymerase I OS=Escherichia coli OX=562 GN=polA PE=3 SV=1 - [A0A0K3WWL8_ECOLX]	1806.72	46.88	23	1	36	84	928	103.123	5.61768	0.000176332	0.000299048	0.0146167	0.00756811	0.589644	-0.762083
ftsA	E6BU22	Cell division protein FtsA (Fragment) OS=Escherichia coli MS 85-1 OX=679202 GN=ftsA PE=3 SV=1 - [E6BU22_ECOLX]	280.68	15.21	14	5	5	11	401	43.0422	5.88428	0.000180907	0.000306817	0.00362717	0.00340122	0.589627	-0.762126
rpsE	A8A5A8	30S ribosomal protein S5 OS=Escherichia coli O9:H4 (strain HS) OX=331112 GN=rpsE PE=3 SV=1 - [RS5_ECOHS]	5729.27	76.05	5	3	10	264	167	17.5923	10.1108	0.000177027	0.000300271	0.0433157	0.0145568	0.589559	-0.762291
BB545_26170	A0A2A3WKA5	Adenylate cyclase OS=Escherichia coli OX=562 GN=BB545_26170 PE=3 SV=1 - [A0A2A3WKA5_ECOLX]	0	0.83	1	1	1	1	848	97.5132	6.21436	0.000179334	0.000304249	0.000705328	0.00151057	0.589433	-0.7626
engD	A0A0D0MKX8	Ribosome-binding ATPase YchF OS=Escherichia coli OX=562 GN=engD PE=3 SV=1 - [A0A0D0MKX8_ECOLX]	928.464	44.9	28	12	13	60	363	39.6563	4.95752	0.00017724	0.000300781	0.0359848	0.0130984	0.589267	-0.763006
AMK83_15960	A0A1C7CQV8	Two-component system response regulator OS=Escherichia coli OX=562 GN=AMK83_15960 PE=4 SV=1 - [A0A1C7CQV8_ECOLX]	1022.72	65.02	7	11	11	51	223	25.5003	5.36377	0.000177071	0.000300571	0.000579454	0.00139782	0.589115	-0.763378
BHF46_12230	A0A1E5WWP3	Universal stress protein F OS=Escherichia coli OX=562 GN=BHF46_12230 PE=4 SV=1 - [A0A1E5WWP3_ECOLX]	914.395	40	23	6	6	39	140	15.4522	6.01123	0.000182412	0.000309661	0.00404879	0.00356986	0.589069	-0.763492
yjeA	A0A0K3T2A4	Elongation factor P--(R)-beta-lysine ligase OS=Escherichia coli OX=562 GN=yjeA PE=3 SV=1 - [A0A0K3T2A4_ECOLX]	113.43	24.62	24	5	5	7	325	36.9224	5.19873	0.00018235	0.000309791	0.0441777	0.014723	0.588622	-0.764587
CSC15_1223	A0A2T7Y048	Uncharacterized protein OS=Escherichia coli OX=562 GN=CSC15_1223 PE=4 SV=1 - [A0A2T7Y048_ECOLX]	0	13.46	2	3	3	4	327	37.0081	7.82568	0.000178583	0.000303465	0.00458533	0.00379052	0.588481	-0.764931
gadA	A5YKF7	Glutamate decarboxylase OS=Escherichia coli OX=562 GN=gadA PE=3 SV=1 - [A5YKF7_ECOLX]	19903.4	71.46	41	1	26	802	466	52.5911	5.41455	0.000174744	0.000296993	0.00398535	0.00354579	0.588377	-0.765188
fepA	A0A0K5ZWX5	Outer membrane receptor for ferrienterochelin and colicins OS=Escherichia coli OX=562 GN=fepA PE=3 SV=1 - [A0A0K5ZWX5_ECOLX]	0	1.61	3	1	1	1	746	82.0134	5.45264	0.000173771	0.00029535	0.0022453	0.00266078	0.588358	-0.765234
rpsU	A0A0K5Z365	30S ribosomal protein S21 OS=Escherichia coli OX=562 GN=rpsU PE=3 SV=1 - [A0A0K5Z365_ECOLX]	200.046	42.25	3	4	4	16	71	8.52474	11.1509	0.000179109	0.000304447	0.00175686	0.00234543	0.588307	-0.765358
ileS	V0XGE5	Isoleucine--tRNA ligase OS=Escherichia coli 908525 OX=1268995 GN=ileS PE=3 SV=1 - [V0XGE5_ECOLX]	2871.48	46.16	14	1	34	139	938	104.242	6.06201	0.000169615	0.000288369	0.00663606	0.00467086	0.588187	-0.765654
fllA	A2V712	Flagellin OS=Escherichia coli OX=562 GN=fllA PE=3 SV=1 - [A2V712_ECOLX]	2360.79	25.56	117	1	10	64	622	63.6815	4.86865	0.000200343	0.000340615	0.0473541	0.0153234	0.588179	-0.765672
Q609_ECAC02519G0002	W1WAS0	Periplasmic nitrate reductase, electron transfer subunit (Fragment) OS=Escherichia coli DORA_A_5_14_21 OX=1403943 GN=Q609_ECAC02519G0002 PE=4 SV=1 - [W1WAS0_ECOLX]	44.2	28.17	15	2	2	2	71	7.73671	8.52881	0.000185482	0.000315471	0.0011731	0.00188448	0.587954	-0.766224
wecC	A0A027ZJU8	UDP-N-acetyl-D-mannosamine dehydrogenase OS=Escherichia coli O69:H11 str. 08-4661 OX=1446753 GN=wecC PE=3 SV=1 - [A0A027ZJU8_ECOLX]	276.939	19.76	45	7	7	13	420	45.8396	5.38916	0.000176527	0.000300253	0.000353416	0.00110876	0.587928	-0.766289
AD40_4915	A0A080FHP1	Uncharacterized protein OS=Escherichia coli 1-392-07_S4_C3 OX=1444275 GN=AD40_4915 PE=4 SV=1 - [A0A080FHP1_ECOLX]	380.154	20.54	38	3	5	22	258	29.41	6.84424	0.000182265	0.000310068	0.00239341	0.00275757	0.587823	-0.766546
EAXG_01643	A0A1X3LLH8	Uridine kinase (Uridine monophosphokinase) (Cytidinemonophosphokinase) OS=Escherichia coli TA054 OX=656433 GN=EAXG_01643 PE=4 SV=1 - [A0A1X3LLH8_ECOLX]	49.8547	64.1	1	1	3	4	39	4.52348	9.42236	0.000172127	0.000292831	0.0112881	0.00647901	0.587804	-0.766593
EC042_1444	D3H4A6	Uncharacterized protein OS=Escherichia coli O44:H18 (strain 042 / EAEC) OX=216592 GN=EC042_1444 PE=4 SV=1 - [D3H4A6_ECO44]	481.759	45.75	10	2	11	26	306	33.5814	5.07178	0.000186762	0.000317755	0.0104232	0.00616642	0.587755	-0.766714
fabD	A0A2T1LMC1	[acyl-carrier-protein] S-malonyltransferase OS=Escherichia coli OX=562 GN=fabD PE=4 SV=1 - [A0A2T1LMC1_ECOLX]	1190.09	24.27	4	1	5	38	309	32.4506	5.09717	0.000182021	0.000309739	0.0079966	0.0052227	0.587658	-0.76695
cydA	A0A069XWJ3	Cytochrome d ubiquinol oxidase subunit 1 OS=Escherichia coli 3-373-03_S4_C2 OX=1444252 GN=cydA PE=4 SV=1 - [A0A069XWJ3_ECOLX]	974.497	23.37	28	12	12	62	522	58.183	6.80029	0.000168679	0.000287055	0.0348773	0.0128582	0.587619	-0.767048
asnB	A0A2S8JY37	Asparagine synthase B OS=Escherichia coli OX=562 GN=asnB PE=4 SV=1 - [A0A2S8JY37_ECOLX]	902.962	37.55	36	1	17	43	554	62.6181	5.94775	0.000175194	0.000298237	0.0342278	0.0127144	0.587433	-0.767504
AB67_4571	A0A073H214	Helix-turn-helix family protein OS=Escherichia coli 5-366-08_S1_C3 OX=1444102 GN=AB67_4571 PE=4 SV=1 - [A0A073H214_ECOLX]	46.22	9.52	5	1	1	1	84	9.42497	10.3745	0.000185006	0.000314971	0.0122162	0.00679437	0.587374	-0.767649
trmU	H4KF66	tRNA-specific 2-thiouridylase MnmA OS=Escherichia coli DEC2C OX=868140 GN=trmU PE=3 SV=1 - [H4KF66_ECOLX]	382.618	35.57	57	11	11	20	357	39.76	5.04639	0.000176037	0.000299761	0.0202881	0.00922718	0.587259	-0.767932
ECW26_00940	I0VZ25	Uncharacterized protein OS=Escherichia coli W26 OX=1090926 GN=ECW26_00940 PE=4 SV=1 - [I0VZ25_ECOLX]	117.9	22.18	67	4	4	7	239	26.6483	9.40771	0.00017567	0.00029929	0.000749084	0.00154406	0.586957	-0.768673
deoB	A0A0V9S7V9	Phosphopentomutase OS=Escherichia coli OX=562 GN=deoB PE=3 SV=1 - [A0A0V9S7V9_ECOLX]	6039.34	72.73	29	23	23	230	407	44.342	5.35107	0.000176552	0.000300839	0.000230377	0.000882453	0.586866	-0.768896
UC41_29435	A0A0D8V9K7	Glutamate decarboxylase (Fragment) OS=Escherichia coli OX=562 GN=UC41_29435 PE=3 SV=1 - [A0A0D8V9K7_ECOLX]	6758.38	50.72	2	1	6	186	138	15.3798	5.10986	0.000170829	0.000291575	0.0039059	0.00351501	0.585885	-0.771311
rplJ	B7LA78	50S ribosomal protein L10 OS=Escherichia coli (strain 55989 / EAEC) OX=585055 GN=rplJ PE=3 SV=1 - [RL10_ECO55]	1853.8	55.15	5	7	7	63	165	17.7004	8.98291	0.000176617	0.000301477	0.0193987	0.00898215	0.585837	-0.771429
ETEC_1253	E3PKD9	Two-component sensor kinase OS=Escherichia coli O78:H11 (strain H10407 / ETEC) OX=316401 GN=ETEC_1253 PE=4 SV=1 - [E3PKD9_ECOH1]	125.465	25.87	52	9	9	10	402	45.6705	5.23682	0.000175174	0.000299271	0.00738395	0.00496322	0.585337	-0.772661
yagU	A0A073I3E5	Inner membrane protein yagU OS=Escherichia coli 5-366-08_S1_C3 OX=1444102 GN=yagU PE=4 SV=1 - [A0A073I3E5_ECOLX]	199.187	25.49	28	4	4	13	204	22.9379	7.02002	0.000181325	0.000309878	0.0177232	0.00849564	0.585149	-0.773125
BK400_17170	A0A1M2TZ39	Uncharacterized protein OS=Escherichia coli OX=562 GN=BK400_17170 PE=4 SV=1 - [A0A1M2TZ39_ECOLX]	0	4.25	1	1	1	1	212	24.5058	6.69775	0.000179054	0.000306164	0.0148477	0.00763831	0.58483	-0.773911
yeiP	A0A0K4JA12	Elongation factor P-like protein OS=Escherichia coli OX=562 GN=yeiP PE=3 SV=1 - [A0A0K4JA12_ECOLX]	111.868	38.42	18	7	7	19	190	21.533	5.021	0.000178049	0.000304475	0.0410969	0.0141325	0.584773	-0.774053
WQ89_21735	A0A0L1BSB5	Transcriptional regulator OS=Escherichia coli OX=562 GN=WQ89_21735 PE=4 SV=1 - [A0A0L1BSB5_ECOLX]	579.948	52.36	31	11	11	32	191	21.932	5.08447	0.000177739	0.00030395	0.00285067	0.00302714	0.584764	-0.774074
thrC	A0A029J461	Threonine synthase OS=Escherichia coli 2-005-03_S4_C2 OX=1444228 GN=thrC PE=4 SV=1 - [A0A029J461_ECOLX]	1011.27	46.73	76	14	14	44	428	47.0822	5.40186	0.000184176	0.000314987	0.0145122	0.00753609	0.584709	-0.774208
Q609_ECAC00272G0001	W1XBE0	Protein visC (Fragment) OS=Escherichia coli DORA_A_5_14_21 OX=1403943 GN=Q609_ECAC00272G0001 PE=4 SV=1 - [W1XBE0_ECOLX]	133.11	17.26	40	2	6	9	394	43.5015	7.06396	0.000181818	0.000311092	0.00289955	0.00305359	0.584452	-0.774845
ECDEC1C_1806	H4IRQ6	Serine protease OS=Escherichia coli DEC1C OX=868135 GN=ECDEC1C_1806 PE=3 SV=1 - [H4IRQ6_ECOLX]	107.07	19.22	54	5	5	6	255	27.4448	6.01123	0.000174128	0.00029806	0.000125882	0.000638602	0.584202	-0.77546
uvrB	A0A085P4G1	UvrABC system protein B OS=Escherichia coli OX=562 GN=uvrB PE=3 SV=1 - [A0A085P4G1_ECOLX]	597.022	23.77	49	14	14	37	673	76.1775	5.31299	0.00017805	0.000304795	0.000327096	0.00106745	0.584164	-0.775555
ratA	A0A073FTL0	Ribosome association toxin RatA OS=Escherichia coli 2-427-07_S4_C3 OX=1444266 GN=ratA PE=4 SV=1 - [A0A073FTL0_ECOLX]	43.99	19.38	24	1	2	4	129	14.4534	8.85107	0.000175708	0.000300872	0.0179646	0.00856783	0.583995	-0.775973
rpsI	A7ZSC4	30S ribosomal protein S9 OS=Escherichia coli O139:H28 (strain E24377A / ETEC) OX=331111 GN=rpsI PE=3 SV=1 - [RS9_ECO24]	1235.37	53.08	4	8	8	111	130	14.847	10.9458	0.000175924	0.000301501	0.0272561	0.0110424	0.583495	-0.777209
purH	A0A192EXL6	Bifunctional purine biosynthesis protein PurH OS=Escherichia coli OX=562 GN=purH PE=3 SV=1 - [A0A192EXL6_ECOLX]	462.076	34.59	78	15	15	20	529	57.309	5.99854	0.000176316	0.000302219	0.00670128	0.00469727	0.583405	-0.777429
purC	A0A2H9F0T5	Phosphoribosylaminoimidazole-succinocarboxamide synthase OS=Escherichia coli OX=562 GN=purC PE=3 SV=1 - [A0A2H9F0T5_ECOLX]	545.441	54.55	23	11	11	32	231	26.2804	5.14795	0.000174785	0.000299841	0.0194716	0.00900255	0.582927	-0.778612
wrbA	A0A0A1A405	NAD(P)H dehydrogenase (quinone) OS=Escherichia coli OX=562 GN=wrbA PE=3 SV=1 - [A0A0A1A405_ECOLX]	6433.67	61.62	8	5	11	221	198	20.8594	5.85889	0.000176663	0.00030319	0.0127836	0.00697773	0.58268	-0.779224
rplO	A0A140RNX1	50S ribosomal protein L15 OS=Escherichia coli OX=562 GN=rplO PE=3 SV=1 - [A0A140RNX1_ECOLX]	4288.97	63.19	13	11	11	183	144	14.9383	11.019	0.000176324	0.000302783	0.039462	0.0138145	0.582346	-0.780052
rplT	W1X3C7	50S ribosomal protein L20 OS=Escherichia coli DORA_A_5_14_21 OX=1403943 GN=rplT PE=3 SV=1 - [W1X3C7_ECOLX]	776.116	48.51	5	7	7	52	101	11.5354	10.9019	0.000174873	0.000300335	0.00542623	0.00415281	0.582259	-0.780266
rpmD	C4ZUF7	50S ribosomal protein L30 OS=Escherichia coli (strain K12 / MC4100 / BW2952) OX=595496 GN=rpmD PE=3 SV=1 - [RL30_ECOBW]	745.303	57.63	4	3	3	38	59	6.53765	10.9604	0.000175363	0.000301266	0.0328135	0.0123937	0.582088	-0.780691
fbp	A0A080FGT8	Fructose-1,6-bisphosphatase class 1 OS=Escherichia coli 1-392-07_S4_C3 OX=1444275 GN=fbp PE=3 SV=1 - [A0A080FGT8_ECOLX]	1221.85	50	25	12	12	50	332	36.7346	5.98584	0.000176321	0.000303084	0.0453851	0.0149538	0.581756	-0.781513
rof	A0A2T7XZJ0	Protein rof OS=Escherichia coli OX=562 GN=rof PE=4 SV=1 - [A0A2T7XZJ0_ECOLX]	168.762	65	17	2	4	18	60	6.56951	5.33838	0.000175954	0.000302509	0.0487475	0.015577	0.581649	-0.78178
ypfN	A0A0K4MG16	UPF0370 protein YpfN OS=Escherichia coli OX=562 GN=ypfN PE=3 SV=1 - [A0A0K4MG16_ECOLX]	0	39.39	9	2	2	3	66	8.09631	8.41162	0.000176522	0.000303619	0.00105766	0.00179242	0.581391	-0.782419
AD23_1883	A0A029HYP4	Phospho-2-dehydro-3-deoxyheptonate aldolase OS=Escherichia coli 2-005-03_S4_C3 OX=1444258 GN=AD23_1883 PE=3 SV=1 - [A0A029HYP4_ECOLX]	103.275	19.83	62	6	6	8	348	38.6907	6.90283	0.000181488	0.000312189	0.0465931	0.0151821	0.58134	-0.782545
dapD	B7NIC7	2,3,4,5-tetrahydropyridine-2,6-dicarboxylate N-succinyltransferase OS=Escherichia coli O7:K1 (strain IAI39 / ExPEC) OX=585057 GN=dapD PE=3 SV=1 - [DAPD_ECO7I]	880.675	42.34	29	11	11	53	274	29.8725	6.01123	0.000175785	0.000302465	0.0488995	0.0156043	0.581176	-0.782952
rplK	A0A073HCM5	50S ribosomal protein L11 OS=Escherichia coli 5-366-08_S1_C3 OX=1444102 GN=rplK PE=3 SV=1 - [A0A073HCM5_ECOLX]	2011.27	49.21	10	6	6	84	126	13.1799	9.30518	0.000176244	0.00030341	0.0411713	0.0141467	0.580877	-0.783695
ubiJ	A0A023KRD1	Membrane protein OS=Escherichia coli OX=562 GN=ubiJ PE=4 SV=1 - [A0A023KRD1_ECOLX]	52.1	10.95	46	3	3	3	201	22.1088	6.07471	0.000180433	0.000310652	0.0146415	0.00757571	0.580819	-0.783838
Q609_ECAC00282G0001	W1XDV8	Aspartate--ammonia ligase (Fragment) OS=Escherichia coli DORA_A_5_14_21 OX=1403943 GN=Q609_ECAC00282G0001 PE=3 SV=1 - [W1XDV8_ECOLX]	65.19	12.04	48	3	3	3	299	33.1048	5.26221	0.000194455	0.000334829	0.0393633	0.0137949	0.58076	-0.783986
C5715_17990	A0A2S8JQA7	Outer membrane protein assembly factor BamC OS=Escherichia coli OX=562 GN=C5715_17990 PE=4 SV=1 - [A0A2S8JQA7_ECOLX]	1327.94	52.91	55	1	14	58	344	36.8236	5.56689	0.000176275	0.00030356	0.023454	0.0100425	0.580692	-0.784155
HMPREF9540_04100	D7Y911	Uncharacterized protein OS=Escherichia coli MS 115-1 OX=749537 GN=HMPREF9540_04100 PE=4 SV=1 - [D7Y911_ECOLX]	723.884	46.33	36	7	7	30	218	23.775	5.5542	0.000184046	0.000317092	0.00854899	0.00544805	0.580418	-0.784835
rpsM	W1F3G5	30S ribosomal protein S13 OS=Escherichia coli ISC7 OX=1432555 GN=rpsM PE=3 SV=1 - [W1F3G5_ECOLX]	2705.83	72.22	9	8	8	109	108	11.9025	10.2573	0.00017554	0.00030247	0.0393367	0.0137896	0.580354	-0.784995
ybl178	A0A0K4BK85	Ybl178 OS=Escherichia coli OX=562 GN=ybl178 PE=4 SV=1 - [A0A0K4BK85_ECOLX]	163.991	28.88	39	7	7	10	277	30.4267	8.03076	0.000183449	0.000316259	0.00375052	0.00345273	0.580059	-0.785728
erfK	B7MDB6	Uncharacterized protein OS=Escherichia coli O45:K1 (strain S88 / ExPEC) OX=585035 GN=erfK PE=4 SV=1 - [B7MDB6_ECO45]	172.33	40.65	23	3	11	25	310	34.3247	9.29053	0.000175744	0.000303066	8.12535e-05	0.000498823	0.579886	-0.78616
C5715_21340	A0A2S8JNP9	Transglycosylase (Fragment) OS=Escherichia coli OX=562 GN=C5715_21340 PE=4 SV=1 - [A0A2S8JNP9_ECOLX]	22.76	2.09	1	1	1	3	383	41.897	9.78857	0.000168897	0.000291341	0.0212275	0.00947671	0.579724	-0.786563
tmk	A0A073HM11	Thymidylate kinase OS=Escherichia coli 5-366-08_S1_C3 OX=1444102 GN=tmk PE=3 SV=1 - [A0A073HM11_ECOLX]	153.316	46.95	29	9	9	14	213	23.7194	5.37646	0.000178245	0.000307468	0.00394976	0.00353209	0.579717	-0.786579
glpD	A0A0J2E1B0	Glycerol-3-phosphate dehydrogenase OS=Escherichia coli OX=562 GN=glpD PE=3 SV=1 - [A0A0J2E1B0_ECOLX]	300.607	32.53	109	17	17	24	501	56.6992	7.6792	0.000175693	0.000303369	0.00246769	0.00280412	0.57914	-0.788017
trmL	A0A0A1AAF0	tRNA (cytidine(34)-2'-O)-methyltransferase OS=Escherichia coli OX=562 GN=trmL PE=3 SV=1 - [A0A0A1AAF0_ECOLX]	113.012	48.41	30	6	6	12	157	17.715	6.68311	0.000176425	0.000304933	0.0226019	0.00983095	0.578568	-0.789442
EC90111_5708	I2W990	Uncharacterized protein OS=Escherichia coli 9.0111 OX=869686 GN=EC90111_5708 PE=4 SV=1 - [I2W990_ECOLX]	23.3	1.28	1	1	1	1	547	61.7936	8.54346	0.00016691	0.000288525	0.0168264	0.00822655	0.578496	-0.789621
AZZ83_002663	A0A192ERH7	Transketolase OS=Escherichia coli OX=562 GN=AZZ83_002663 PE=3 SV=1 - [A0A192ERH7_ECOLX]	4343.32	40.18	2	2	24	196	667	73.0529	6.41748	0.000176591	0.00030528	0.0230756	0.0099494	0.578456	-0.789721
rlmJ	A0A2P4RRM4	Ribosomal RNA large subunit methyltransferase J OS=Escherichia coli OX=562 GN=rlmJ PE=3 SV=1 - [A0A2P4RRM4_ECOLX]	314.848	35	11	2	8	17	280	31.9237	8.90967	0.000177664	0.000307332	1.86387e-05	0.000211616	0.578085	-0.790646
AZZ83_002117	A0A243V495	Diaminopimelate epimerase OS=Escherichia coli OX=562 GN=AZZ83_002117 PE=3 SV=1 - [A0A243V495_ECOLX]	107.233	26.96	26	4	4	4	204	22.7665	6.04932	0.00017577	0.000304068	0.0165243	0.00813717	0.578061	-0.790706
BW70_22835	A0A026UN78	S-formylglutathione hydrolase OS=Escherichia coli O174:H8 str. 04-3038 OX=1446704 GN=BW70_22835 PE=3 SV=1 - [A0A026UN78_ECOLX]	87.82	9.35	67	3	3	5	278	31.2531	5.42725	0.000179322	0.000310248	0.0036812	0.00342402	0.577998	-0.790865
ycgN	A0A029I590	UPF0260 protein YcgN OS=Escherichia coli 2-005-03_S4_C3 OX=1444258 GN=ycgN PE=3 SV=1 - [A0A029I590_ECOLX]	76.0737	27.7	30	3	3	5	148	17.2732	5.09717	0.000184961	0.000320091	0.0188716	0.00883271	0.577839	-0.791262
baeR	A0A0K4BPE7	Two-component response regulator OS=Escherichia coli OX=562 GN=baeR PE=4 SV=1 - [A0A0K4BPE7_ECOLX]	283.32	47.92	44	10	10	24	240	27.6526	5.75732	0.000174142	0.000301381	0.00204569	0.00252789	0.577814	-0.791323
guaB	A0A0E2L2N1	Inosine-5'-monophosphate dehydrogenase OS=Escherichia coli (strain UMEA 3162-1) OX=1281200 GN=guaB PE=3 SV=1 - [A0A0E2L2N1_ECOU3]	1364.07	58.4	12	8	19	52	488	51.963	6.41748	0.000174149	0.000301475	0.0108872	0.00633648	0.577658	-0.791713
AKG99_01325	A0A0L6Y5L6	Peptidyl-prolyl cis-trans isomerase OS=Escherichia coli OX=562 GN=AKG99_01325 PE=3 SV=1 - [A0A0L6Y5L6_ECOLX]	2055.44	60	28	2	15	88	270	28.9242	8.47021	0.000169201	0.000292914	0.0315878	0.012107	0.577647	-0.791739
Q609_ECAC00432G0001	W1XAA8	Uncharacterized protein (Fragment) OS=Escherichia coli DORA_A_5_14_21 OX=1403943 GN=Q609_ECAC00432G0001 PE=4 SV=1 - [W1XAA8_ECOLX]	53.03	28.57	17	1	1	2	35	3.9031	4.32275	0.000180369	0.000312313	0.0321248	0.0122336	0.577525	-0.792044
ECs3438	Q8XA28	Anti-sigma-E factor RseA OS=Escherichia coli O157:H7 OX=83334 GN=ECs3438 PE=3 SV=1 - [Q8XA28_ECO57]	25.1	25.94	5	1	4	5	212	23.8228	5.19873	0.000181597	0.000314463	0.030689	0.0118956	0.577482	-0.792152
clpX	A0A066SXC7	ATP-dependent Clp protease ATP-binding subunit ClpX OS=Escherichia coli OX=562 GN=clpX PE=3 SV=1 - [A0A066SXC7_ECOLX]	914.975	41.98	67	14	14	54	424	46.2882	5.30029	0.000173515	0.000300584	0.0010154	0.00176332	0.57726	-0.792707
C6986_23315	A0A2T1MS52	Alpha-hydroxy-acid oxidizing protein (Fragment) OS=Escherichia coli OX=562 GN=C6986_23315 PE=4 SV=1 - [A0A2T1MS52_ECOLX]	127.37	16.39	58	4	4	5	299	31.9855	6.69775	0.000183601	0.000318385	0.000741475	0.00153842	0.576663	-0.7942
yqjH	A0A0K4J2G5	Siderophore-interacting protein OS=Escherichia coli OX=562 GN=yqjH PE=4 SV=1 - [A0A0K4J2G5_ECOLX]	61.0375	29.13	72	5	5	6	254	28.8225	6.17627	0.000174424	0.000302595	0.0139336	0.00735516	0.576427	-0.79479
RK56_015490	A0A2K0PJJ2	Flavodoxin family protein OS=Escherichia coli OX=562 GN=RK56_015490 PE=4 SV=1 - [A0A2K0PJJ2_ECOLX]	129.43	36.13	33	5	5	7	191	21.7209	6.29053	0.000175883	0.000305296	0.001135	0.00185295	0.576105	-0.795597
hchA	A0A0H0QK96	Protein/nucleic acid deglycase HchA OS=Escherichia coli OX=562 GN=hchA PE=2 SV=1 - [A0A0H0QK96_ECOLX]	1346.08	55.12	15	1	13	77	283	31.1706	6.17627	0.000174391	0.000302817	0.0167537	0.00820516	0.575897	-0.796116
dld	A0A0H3EJ33	Quinone-dependent D-lactate dehydrogenase OS=Escherichia coli O83:H1 (strain NRG 857C / AIEC) OX=685038 GN=dld PE=3 SV=1 - [A0A0H3EJ33_ECO8N]	791.821	50.79	25	25	25	62	571	64.6207	6.75635	0.000174091	0.000302501	0.0360073	0.0131032	0.575505	-0.7971
menI	Q8X5Y9	1,4-dihydroxy-2-naphthoyl-CoA hydrolase OS=Escherichia coli O157:H7 OX=83334 GN=menI PE=3 SV=1 - [Q8X5Y9_ECO57]	0	22.06	1	2	2	2	136	14.8377	7.43018	0.000180639	0.000314186	0.00648674	0.00460956	0.574944	-0.798507
Q609_ECAC00633G0002	W1X8Z0	Chain length determinant protein (Fragment) OS=Escherichia coli DORA_A_5_14_21 OX=1403943 GN=Q609_ECAC00633G0002 PE=4 SV=1 - [W1X8Z0_ECOLX]	270.443	34.95	133	3	7	15	289	32.0729	5.5542	0.000175737	0.000305817	0.0454548	0.0149671	0.574647	-0.799253
dusA	A0A1V2T7A8	tRNA-dihydrouridine(20/20a) synthase OS=Escherichia coli OX=562 GN=dusA PE=3 SV=1 - [A0A1V2T7A8_ECOLX]	82.603	21.88	79	5	5	7	288	31.6649	6.22705	0.00017908	0.000311679	0.0385894	0.0136399	0.574566	-0.799456
rpsA	A0A125X606	30S ribosomal protein S1 OS=Escherichia coli 1-110-08_S3_C1 OX=1444132 GN=rpsA PE=3 SV=1 - [A0A125X606_ECOLX]	16743	64.27	12	1	41	671	557	61.1167	4.98291	0.000173256	0.000301622	0.0449283	0.0148661	0.574415	-0.799835
BH694_01760	A0A061YD38	Putative glutamate--cysteine ligase 2 OS=Escherichia coli OX=562 GN=BH694_01760 PE=3 SV=1 - [A0A061YD38_ECOLX]	540.246	25	57	3	8	16	372	41.6687	6.16357	0.000178381	0.000310777	0.0211249	0.0094499	0.573982	-0.800922
AC28_5354	A0A080I249	Nitrite extrusion protein 2 (Fragment) OS=Escherichia coli 1-250-04_S3_C2 OX=1444163 GN=AC28_5354 PE=4 SV=1 - [A0A080I249_ECOLX]	46.2886	5.88	81	2	2	4	374	40.2884	9.99365	0.000168119	0.000292928	0.037314	0.0133787	0.573927	-0.80106
mnmG	A0A027TH91	tRNA uridine 5-carboxymethylaminomethyl modification enzyme MnmG OS=Escherichia coli O111:NM str. K6722 OX=1446533 GN=mnmG PE=3 SV=1 - [A0A027TH91_ECOLX]	110.337	10.17	59	6	6	6	629	69.4918	6.63916	0.00017235	0.000300306	0.00118376	0.00189312	0.573914	-0.801094
BW690_10865	A0A1V2G3E4	Miniconductance mechanosensitive channel (Fragment) OS=Escherichia coli OX=562 GN=BW690_10865 PE=4 SV=1 - [A0A1V2G3E4_ECOLX]	61.72	22.79	40	9	9	11	373	41.8434	9.33447	0.000175117	0.00030516	0.000429457	0.00121965	0.573854	-0.801244
sapF	A0A023YWE0	Peptide transport system ATP-binding protein sapF OS=Escherichia coli O145:H28 str. RM12581 OX=1248823 GN=sapF PE=4 SV=1 - [A0A023YWE0_ECOLX]	41.85	19.78	22	4	4	5	268	30.5351	9.48096	0.000173752	0.000302826	0.000346394	0.00109806	0.573768	-0.80146
pheS	A0A0D8WFA4	Phenylalanine--tRNA ligase alpha subunit OS=Escherichia coli OX=562 GN=pheS PE=3 SV=1 - [A0A0D8WFA4_ECOLX]	767.286	54.43	29	1	17	47	327	36.7646	6.06201	0.000180407	0.000314432	0.00990008	0.00596784	0.573756	-0.801491
miaB	I0VQJ0	tRNA-2-methylthio-N(6)-dimethylallyladenosine synthase OS=Escherichia coli W26 OX=1090926 GN=miaB PE=3 SV=1 - [I0VQJ0_ECOLX]	334.98	35.76	52	15	15	30	453	51.1199	5.17334	0.000173369	0.000302171	0.00308727	0.00315121	0.573745	-0.801519
dapE	Q0TF05	Succinyl-diaminopimelate desuccinylase OS=Escherichia coli O6:K15:H31 (strain 536 / UPEC) OX=362663 GN=dapE PE=3 SV=1 - [DAPE_ECOL5]	251.024	38.13	45	11	11	20	375	41.3009	5.41455	0.000172102	0.000300277	0.00226162	0.00267171	0.573146	-0.803026
C6985_21260	A0A2T1LE08	Multidrug efflux RND transporter permease subunit OS=Escherichia coli OX=562 GN=C6985_21260 PE=4 SV=1 - [A0A2T1LE08_ECOLX]	132.2	5.88	2	1	4	9	1038	112.373	5.74463	0.000180625	0.000315381	0.00382896	0.00348453	0.572721	-0.804096
manZ	D7X963	Mannose permease IID component (Fragment) OS=Escherichia coli MS 198-1 OX=749549 GN=manZ PE=4 SV=1 - [D7X963_ECOLX]	640.03	38.61	19	10	10	45	259	28.4481	9.40771	0.000177367	0.000309709	0.000270297	0.000965912	0.572688	-0.804178
ECRM12581_5030	A0A023YUL0	Uncharacterized protein OS=Escherichia coli O145:H28 str. RM12581 OX=1248823 GN=ECRM12581_5030 PE=4 SV=1 - [A0A023YUL0_ECOLX]	163.47	30.98	48	7	7	14	297	34.4494	7.09326	0.000173691	0.000303295	0.0377114	0.0134609	0.572679	-0.804202
cdd	A0A0D8WDM3	Cytidine deaminase OS=Escherichia coli OX=562 GN=cdd PE=3 SV=1 - [A0A0D8WDM3_ECOLX]	724.869	52.04	39	11	11	37	294	31.5709	5.88428	0.000174848	0.00030534	0.00164368	0.00226568	0.572635	-0.804312
ECW26_15620	I0VUD8	Hydrogenase expression/formation protein OS=Escherichia coli W26 OX=1090926 GN=ECW26_15620 PE=4 SV=1 - [I0VUD8_ECOLX]	79.7796	36.6	31	5	5	6	153	16.5647	4.65283	0.000179487	0.000313533	0.00049496	0.00130467	0.572467	-0.804736
BHS81_21510	A0A1X0YLP1	Uncharacterized protein OS=Escherichia coli OX=562 GN=BHS81_21510 PE=4 SV=1 - [A0A1X0YLP1_ECOLX]	188.223	41.18	23	4	4	10	102	11.5501	9.59814	0.000171218	0.000299131	0.00236884	0.00274189	0.572386	-0.804939
BET08_34770	A0A1V2T6F6	Lysophospholipase (Fragment) OS=Escherichia coli OX=562 GN=BET08_34770 PE=4 SV=1 - [A0A1V2T6F6_ECOLX]	0	4.13	39	1	1	1	218	24.5936	9.49561	0.000166429	0.000290882	0.000409439	0.00119098	0.572154	-0.805524
ulaD	A0A2R9W2I3	3-keto-L-gulonate-6-phosphate decarboxylase (Fragment) OS=Escherichia coli OX=562 GN=ulaD PE=4 SV=1 - [A0A2R9W2I3_ECOLX]	48.8029	23.36	33	4	4	5	214	23.32	5.18604	0.000176612	0.000308757	0.0485867	0.0155481	0.572009	-0.805891
BET08_20195	A0A1V2T1R7	Membrane protein insertase YidC (Fragment) OS=Escherichia coli OX=562 GN=BET08_20195 PE=3 SV=1 - [A0A1V2T1R7_ECOLX]	930.221	36.06	37	12	12	41	513	57.3463	8.30908	0.000173415	0.000303221	0.00202003	0.00251279	0.571912	-0.806136
WLH_00559	A0A192C7E3	Formate-dependent phosphoribosylglycinamide formyltransferase OS=Escherichia coli O25b:H4 OX=941280 GN=WLH_00559 PE=3 SV=1 - [A0A192C7E3_ECOLX]	59.74	22.73	40	3	3	3	154	16.2976	5.84619	0.000177579	0.000310511	0.0468568	0.0152313	0.571894	-0.806181
G925_03702	A0A0E2L0R9	Protein dcrB OS=Escherichia coli (strain UMEA 3162-1) OX=1281200 GN=G925_03702 PE=4 SV=1 - [A0A0E2L0R9_ECOU3]	1253.42	48.65	23	9	9	52	185	19.7742	5.56689	0.000168315	0.0002947	0.00695927	0.00479962	0.57114	-0.808082
purL	S1PX40	Phosphoribosylformylglycinamidine synthase OS=Escherichia coli KTE182 OX=1181728 GN=purL PE=3 SV=1 - [S1PX40_ECOLX]	209.14	11.12	19	4	11	12	1295	141.097	5.46533	0.000173231	0.000303333	0.0490808	0.0156368	0.571091	-0.808207
rpsN	A0A024L0D3	30S ribosomal protein S14 OS=Escherichia coli OX=562 GN=rpsN PE=3 SV=1 - [A0A024L0D3_ECOLX]	614.462	37.5	5	4	4	46	96	11.028	11.1509	0.000172321	0.000301854	0.0413447	0.0141798	0.570876	-0.808751
UMNK88_406	A0A0E0TU07	S-formylglutathione hydrolase FrmB OS=Escherichia coli UMNK88 OX=696406 GN=UMNK88_406 PE=4 SV=1 - [A0A0E0TU07_ECOLX]	54.7609	13.83	79	2	2	3	188	20.8372	6.93213	0.000183521	0.000321617	0.040233	0.0139659	0.570621	-0.809395
C1I57_16630	A0A2P6HY30	Mechanosensitive channel protein (Fragment) OS=Escherichia coli OX=562 GN=C1I57_16630 PE=4 SV=1 - [A0A2P6HY30_ECOLX]	32.85	5.35	111	4	4	4	729	80.2559	9.18799	0.000167473	0.000293638	0.00114149	0.00185839	0.570337	-0.810113
ACN002_0021	A0A066ST70	30S ribosomal protein S20 OS=Escherichia coli OX=562 GN=ACN002_0021 PE=4 SV=1 - [A0A066ST70_ECOLX]	872.159	50.82	8	4	4	60	61	6.73067	10.3599	0.000171774	0.000301334	0.0357226	0.013042	0.570044	-0.810855
nusB	I0VQV2	Transcription antitermination protein NusB OS=Escherichia coli W26 OX=1090926 GN=nusB PE=3 SV=1 - [I0VQV2_ECOLX]	582.919	53.39	12	7	7	24	118	13.225	5.12256	0.000174649	0.000306434	0.0267004	0.0108969	0.569939	-0.81112
gpmI	A0A163ILF4	2,3-bisphosphoglycerate-independent phosphoglycerate mutase OS=Escherichia coli OX=562 GN=gpmI PE=3 SV=1 - [A0A163ILF4_ECOLX]	2161.84	50.78	14	1	18	92	514	56.1172	5.33838	0.000171039	0.000300215	0.035942	0.0130892	0.569723	-0.811668
BX06_12905	A0A028AHC3	Uncharacterized protein OS=Escherichia coli O69:H11 str. 08-4661 OX=1446753 GN=BX06_12905 PE=4 SV=1 - [A0A028AHC3_ECOLX]	67.9983	15.04	98	5	5	7	452	51.0499	5.80811	0.000180194	0.000316446	0.00489308	0.00391756	0.56943	-0.812409
zapB	B1IVF1	Cell division protein ZapB OS=Escherichia coli (strain ATCC 8739 / DSM 1576 / Crooks) OX=481805 GN=zapB PE=3 SV=1 - [ZAPB_ECOLC]	641.607	79.75	13	6	6	27	79	9.39672	4.66553	0.000174749	0.0003069	0.0285034	0.0113612	0.5694	-0.812486
AD17_2020	A0A069XLP8	Putative diguanylate cyclase YeaP OS=Escherichia coli 3-373-03_S4_C2 OX=1444252 GN=AD17_2020 PE=4 SV=1 - [A0A069XLP8_ECOLX]	26.65	8.99	73	2	2	2	189	21.4998	4.99561	0.000180638	0.000317278	0.00722705	0.00490245	0.569336	-0.812647
tusA	A0A2T7Y780	Sulfurtransferase TusA OS=Escherichia coli OX=562 GN=tusA PE=4 SV=1 - [A0A2T7Y780_ECOLX]	22.54	13.79	5	1	1	1	58	6.59335	7.18115	0.000173314	0.000304576	0.00909081	0.00565871	0.569033	-0.813416
frdB	A0A024L8E6	Succinate dehydrogenase iron-sulfur subunit OS=Escherichia coli OX=562 GN=frdB PE=3 SV=1 - [A0A024L8E6_ECOLX]	597.416	47.3	19	8	8	37	241	26.7741	6.75635	0.000175557	0.000308688	0.000229517	0.000880664	0.568719	-0.814211
AC16_1704	A0A070UW34	Uncharacterized protein OS=Escherichia coli 2-177-06_S3_C2 OX=1444151 GN=AC16_1704 PE=4 SV=1 - [A0A070UW34_ECOLX]	163.527	19.51	27	6	6	9	405	45.5164	6.25244	0.00018015	0.000316773	0.00230658	0.00270149	0.568704	-0.814251
C6986_15790	A0A2T1MW34	Oxidoreductase UcpA (Fragment) OS=Escherichia coli OX=562 GN=C6986_15790 PE=4 SV=1 - [A0A2T1MW34_ECOLX]	582.893	57.98	42	12	12	30	257	27.276	5.2749	0.000173831	0.000306112	0.020242	0.0092147	0.567868	-0.816374
NRG857_06140	A0A0H3EI81	Dihydroxyacetone kinase subunit M OS=Escherichia coli O83:H1 (strain NRG 857C / AIEC) OX=685038 GN=NRG857_06140 PE=3 SV=1 - [A0A0H3EI81_ECO8N]	257.909	22.46	95	1	8	16	472	51.5583	4.729	0.000173738	0.000306066	0.0205508	0.00929789	0.567648	-0.816932
nrdR	A0A2D0AS21	Transcriptional repressor NrdR OS=Escherichia coli OX=562 GN=nrdR PE=3 SV=1 - [A0A2D0AS21_ECOLX]	210.493	57.35	16	8	8	16	136	15.7571	7.97217	0.000171496	0.000302121	0.0229093	0.00990805	0.56764	-0.816953
ACU90_07470	A0A066RIS3	Uncharacterized protein OS=Escherichia coli OX=562 GN=ACU90_07470 PE=4 SV=1 - [A0A066RIS3_ECOLX]	85.135	17.79	56	2	2	3	163	17.2427	5.93506	0.000181536	0.000320076	0.00529672	0.00409282	0.567164	-0.818162
BXT93_24560	A0A1V2G3X4	Formate dehydrogenase subunit beta (Fragment) OS=Escherichia coli OX=562 GN=BXT93_24560 PE=4 SV=1 - [A0A1V2G3X4_ECOLX]	191.854	22.91	44	5	6	9	275	30.0257	6.75635	0.000179432	0.000316646	0.00941546	0.00578031	0.566665	-0.819433
BXT93_03510	A0A1V2GK56	Transcription elongation factor GreB (Fragment) OS=Escherichia coli OX=562 GN=BXT93_03510 PE=3 SV=1 - [A0A1V2GK56_ECOLX]	49.99	20.59	20	2	2	2	102	12.2783	8.6167	0.000176388	0.000311373	0.00147154	0.00213392	0.566486	-0.819887
G943_04330	T9DC17	Carboxymethylenebutenolidase OS=Escherichia coli UMEA 3212-1 OX=1281218 GN=G943_04330 PE=4 SV=1 - [T9DC17_ECOLX]	247.055	34.32	4	1	5	12	271	29.3039	6.72705	0.000174419	0.000307933	0.0164206	0.00810617	0.566419	-0.820059
livJ_2	A0A1D3KG48	Leu/Ile/Val-binding protein OS=Escherichia coli OX=562 GN=livJ_2 PE=4 SV=1 - [A0A1D3KG48_ECOLX]	147.227	20.82	131	5	8	15	365	38.6069	6.58057	0.000156343	0.000276206	0.00226528	0.00267415	0.56604	-0.821024
ilvC	A0A0K4R0Z7	Ketol-acid reductoisomerase (NADP(+)) OS=Escherichia coli OX=562 GN=ilvC PE=3 SV=1 - [A0A0K4R0Z7_ECOLX]	774.774	48.47	62	20	22	44	491	53.9163	5.37646	0.000175612	0.000310247	0.00337804	0.0032911	0.56604	-0.821025
hdeA	H4KNB5	Acid stress chaperone HdeA OS=Escherichia coli DEC2C OX=868140 GN=hdeA PE=3 SV=1 - [H4KNB5_ECOLX]	1333.46	65.59	14	3	3	41	93	10.111	5.04639	0.000154965	0.000273832	0.0216985	0.00959919	0.565915	-0.821343
mltC	A0A125WYW4	Membrane-bound lytic murein transglycosylase C OS=Escherichia coli 1-110-08_S3_C1 OX=1444132 GN=mltC PE=3 SV=1 - [A0A125WYW4_ECOLX]	0	4.74	1	1	1	1	359	40.0835	9.33447	0.000176896	0.000312756	0.000745918	0.00154172	0.565606	-0.822132
yhcH	A0A024KP42	Uncharacterized protein OS=Escherichia coli D6-113.11 OX=1400022 GN=yhcH PE=4 SV=1 - [A0A024KP42_ECOLX]	30.94	6.54	16	1	1	1	153	16.8945	5.17334	0.000164412	0.000290895	0.00603834	0.0044215	0.565194	-0.823181
HMPREF9530_04714	D8ADR8	Uncharacterized protein OS=Escherichia coli (strain MS 21-1) OX=749527 GN=HMPREF9530_04714 PE=4 SV=1 - [D8ADR8_ECOMS]	24.54	13.02	26	3	3	3	215	23.3091	6.96143	0.000180134	0.000318804	0.0121833	0.00678354	0.565031	-0.823599
G943_00211	T9DY55	Lipid A palmitoyltransferase PagP OS=Escherichia coli UMEA 3212-1 OX=1281218 GN=G943_00211 PE=3 SV=1 - [T9DY55_ECOLX]	0	11.88	54	1	1	1	101	11.9818	6.78564	0.000166278	0.000294291	0.000214716	0.000848868	0.565011	-0.823649
BMT49_24735	A0A1Q4P9S0	Nitrite reductase large subunit OS=Escherichia coli OX=562 GN=BMT49_24735 PE=3 SV=1 - [A0A1Q4P9S0_ECOLX]	209.447	22.08	6	2	17	23	847	93.0472	6.21436	0.000184553	0.000326766	0.0123258	0.00683033	0.564787	-0.82422
rraB	A0A025CNU5	Regulator of ribonuclease activity B OS=Escherichia coli O145:NM str. 2010C-3526 OX=1446596 GN=rraB PE=3 SV=1 - [A0A025CNU5_ECOLX]	65.97	15.22	25	3	3	6	138	15.6211	3.80225	0.000168986	0.000299666	0.0352663	0.0129432	0.563913	-0.826455
BXT93_27365	A0A1V2FV79	Holo-[acyl-carrier-protein] synthase (Fragment) OS=Escherichia coli OX=562 GN=BXT93_27365 PE=4 SV=1 - [A0A1V2FV79_ECOLX]	55.4353	31.82	31	2	2	3	66	7.36904	10.3892	0.000167654	0.000297523	0.00825403	0.00532909	0.563498	-0.827517
cbpM	A0A029I5X8	Chaperone modulatory protein CbpM OS=Escherichia coli 2-005-03_S4_C3 OX=1444258 GN=cbpM PE=4 SV=1 - [A0A029I5X8_ECOLX]	120.47	25	11	1	1	2	96	10.9517	5.16064	0.000184814	0.000328953	0.00743049	0.00498224	0.561825	-0.831807
BIQ87_10305	A0A0J2BFR9	DNA polymerase III subunit theta OS=Escherichia coli OX=562 GN=BIQ87_10305 PE=4 SV=1 - [A0A0J2BFR9_ECOLX]	36.7033	30.26	17	3	3	3	76	8.86772	9.18799	0.000169066	0.000301077	0.00147005	0.00213272	0.561539	-0.832543
rsfS	A0A0E2TTC0	Ribosomal silencing factor RsfS OS=Escherichia coli O121:H19 str. 2010C-3609 OX=1446560 GN=rsfS PE=3 SV=1 - [A0A0E2TTC0_ECOLX]	78.24	8.57	9	1	1	3	105	11.5448	4.70361	0.000168719	0.000300561	0.00609111	0.00444358	0.561347	-0.833034
folD	A0A070UIV3	Bifunctional protein FolD OS=Escherichia coli 2-177-06_S3_C2 OX=1444151 GN=folD PE=3 SV=1 - [A0A070UIV3_ECOLX]	328.853	22.92	25	5	5	16	288	31.0563	6.0874	0.00017097	0.000304899	0.0459161	0.0150548	0.560742	-0.834592
BET08_03715	A0A1V2SW89	tRNA 2-thiocytidine(32) synthetase TtcA (Fragment) OS=Escherichia coli OX=562 GN=BET08_03715 PE=3 SV=1 - [A0A1V2SW89_ECOLX]	69.79	8.04	62	2	2	2	224	25.5413	8.73389	0.000184134	0.00032863	0.00118699	0.00189573	0.560308	-0.835708
glmM	B7MB95	Phosphoglucosamine mutase OS=Escherichia coli O45:K1 (strain S88 / ExPEC) OX=585035 GN=glmM PE=3 SV=1 - [GLMM_ECO45]	1211.33	47.42	34	5	18	59	445	47.4865	6.02393	0.000168343	0.000300547	0.00278387	0.00299028	0.560121	-0.836189
treA	A0A2S4A9V6	Alpha,alpha-trehalase OS=Escherichia coli OX=562 GN=treA PE=4 SV=1 - [A0A2S4A9V6_ECOLX]	989.916	55.22	10	4	20	63	565	63.6987	5.90967	0.000162206	0.000289672	0.0290385	0.0114948	0.559965	-0.836592
HMPREF1604_02548	V0VXL8	Magnesium-importing ATPase OS=Escherichia coli 908519 OX=1268991 GN=HMPREF1604_02548 PE=4 SV=1 - [V0VXL8_ECOLX]	262.528	18.15	80	13	13	24	854	94.3781	5.51611	0.000164576	0.000293991	0.00245256	0.00279474	0.559798	-0.837021
Q609_ECAC02631G0001	W1W7U3	Ribosomal large subunit pseudouridine synthase A (Fragment) OS=Escherichia coli DORA_A_5_14_21 OX=1403943 GN=Q609_ECAC02631G0001 PE=4 SV=1 - [W1W7U3_ECOLX]	62.85	23.36	26	1	1	1	107	12.0082	8.49951	0.000159593	0.0002851	0.00948248	0.005805	0.559777	-0.837075
CWS33_00640	A0A2J1DK03	PTS fructose transporter subunit IIBC OS=Escherichia coli OX=562 GN=CWS33_00640 PE=4 SV=1 - [A0A2J1DK03_ECOLX]	403.074	21.67	55	1	11	18	563	57.6697	8.74854	0.000161437	0.000288431	0.0256019	0.010603	0.559709	-0.837251
GJ11_11280	A0A193LSV5	Glutathione S-transferase OS=Escherichia coli OX=562 GN=GJ11_11280 PE=4 SV=1 - [A0A193LSV5_ECOLX]	1150.7	81.09	19	2	13	65	201	22.8298	6.21436	0.000165474	0.000295854	0.0158317	0.00792752	0.559312	-0.838276
rbsA	A0A026V134	Ribose import ATP-binding protein RbsA OS=Escherichia coli O174:H8 str. 04-3038 OX=1446704 GN=rbsA PE=3 SV=1 - [A0A026V134_ECOLX]	27.59	8.38	63	4	4	5	501	54.8806	5.98584	0.000175586	0.000313945	0.00108737	0.00181206	0.559289	-0.838333
ugpQ	A0A0G9FYD7	Glycerophosphodiester phosphodiesterase OS=Escherichia coli OX=562 GN=ugpQ PE=4 SV=1 - [A0A0G9FYD7_ECOLX]	225.647	42.51	15	1	7	16	247	27.3451	6.30322	0.000167732	0.000299957	0.00453135	0.00376738	0.559188	-0.838595
rmf	P0AFW2	Ribosome modulation factor OS=Escherichia coli (strain K12) OX=83333 GN=rmf PE=1 SV=1 - [RMF_ECOLI]	156.223	54.55	7	4	4	15	55	6.50326	10.8579	0.000185223	0.000331251	0.0214756	0.00954108	0.559161	-0.838663
ycbZ	A0A0H2YXM8	Endopeptidase La OS=Escherichia coli O1:K1 / APEC OX=405955 GN=ycbZ PE=3 SV=1 - [A0A0H2YXM8_ECOK1]	152.28	6.25	55	3	3	4	528	59.0958	4.729	0.000176232	0.000315201	0.0011521	0.00186723	0.559109	-0.838797
Q609_ECAC00565G0001	W1X9W0	HTH-type transcriptional regulator HexR (Fragment) OS=Escherichia coli DORA_A_5_14_21 OX=1403943 GN=Q609_ECAC00565G0001 PE=4 SV=1 - [W1X9W0_ECOLX]	71.41	23.78	38	3	3	3	143	15.7919	6.68311	0.000169555	0.000303557	0.0363637	0.0131791	0.558562	-0.840212
Q609_ECAC00336G0001	W1XB37	Malonyl CoA-acyl carrier protein transacylase (Fragment) OS=Escherichia coli DORA_A_5_14_21 OX=1403943 GN=Q609_ECAC00336G0001 PE=4 SV=1 - [W1XB37_ECOLX]	1258.69	58.33	1	1	6	39	144	15.0817	5.84619	0.000190349	0.000340831	0.0156217	0.00786706	0.558485	-0.840409
BK383_20450	A0A1M2HX41	Uncharacterized protein OS=Escherichia coli OX=562 GN=BK383_20450 PE=4 SV=1 - [A0A1M2HX41_ECOLX]	37.72	11.67	21	1	1	3	60	6.79879	8.88037	0.000170045	0.000304657	0.00348007	0.00333722	0.558151	-0.841272
adk	A0A2A3W4X5	Adenylate kinase OS=Escherichia coli OX=562 GN=adk PE=3 SV=1 - [A0A2A3W4X5_ECOLX]	1119.15	75.23	24	2	15	62	214	23.5563	5.75732	0.000172073	0.000308305	1.71568e-05	0.000203405	0.558127	-0.841334
garR	A0A0J3YNF2	2-hydroxy-3-oxopropionate reductase OS=Escherichia coli OX=562 GN=garR PE=3 SV=1 - [A0A0J3YNF2_ECOLX]	444.004	42.57	46	9	9	24	296	30.6259	5.89697	0.000172144	0.000308685	0.00170748	0.00231126	0.557669	-0.842519
BIZ41_20385	A0A271QS02	Pyruvate-flavodoxin oxidoreductase OS=Escherichia coli OX=562 GN=BIZ41_20385 PE=3 SV=1 - [A0A271QS02_ECOLX]	1657.05	41.23	28	1	37	123	1174	128.697	5.78271	0.000169646	0.000304287	0.00105296	0.00178926	0.557521	-0.842901
trmJ	A0A029IDQ2	tRNA (cytidine/uridine-2'-O-)-methyltransferase TrmJ OS=Escherichia coli 2-005-03_S4_C3 OX=1444258 GN=trmJ PE=4 SV=1 - [A0A029IDQ2_ECOLX]	60.2931	22.37	74	5	5	6	228	25.2702	6.15088	0.000171007	0.000306781	9.26253e-06	0.000154119	0.557424	-0.843152
nrdD	D7XYX1	Anaerobic ribonucleoside-triphosphate reductase OS=Escherichia coli MS 115-1 OX=749537 GN=nrdD PE=4 SV=1 - [D7XYX1_ECOLX]	79.03	8.06	45	5	5	6	707	79.3468	6.80029	0.000170628	0.000306179	0.00267343	0.00292743	0.557282	-0.843522
Q609_ECAC01158G0001	W1X9M7	Uncharacterized protein (Fragment) OS=Escherichia coli DORA_A_5_14_21 OX=1403943 GN=Q609_ECAC01158G0001 PE=4 SV=1 - [W1X9M7_ECOLX]	63.6914	13.33	61	1	1	2	120	13.9322	6.68311	0.000160338	0.000287846	0.0256008	0.0106027	0.557027	-0.84418
yobB	A0A023LG04	Carbon-nitrogen hydrolase OS=Escherichia coli OX=562 GN=yobB PE=4 SV=1 - [A0A023LG04_ECOLX]	39.87	21.56	47	4	4	4	218	24.3544	8.49951	0.000173037	0.000310676	0.000874448	0.00165493	0.556971	-0.844327
AZZ83_000217	A0A192EME8	Lipoprotein OS=Escherichia coli OX=562 GN=AZZ83_000217 PE=4 SV=1 - [A0A192EME8_ECOLX]	5578.26	81.05	12	1	6	222	190	19.4033	8.14795	0.000165628	0.000297515	0.00242263	0.00277604	0.556705	-0.845016
gyrB	T9SCL6	DNA gyrase subunit B OS=Escherichia coli UMEA 3718-1 OX=1281269 GN=gyrB PE=3 SV=1 - [T9SCL6_ECOLX]	1934.29	48.63	121	1	32	87	804	89.8929	6.12549	0.000172895	0.000310604	0.00125509	0.00195015	0.556641	-0.845182
C6976_01580	A0A0J2DNJ3	2,5-diketo-D-gluconic acid reductase OS=Escherichia coli OX=562 GN=C6976_01580 PE=4 SV=1 - [A0A0J2DNJ3_ECOLX]	1165.5	44.52	13	2	11	48	283	31.8893	5.68115	0.000161573	0.000290358	0.0269714	0.0109681	0.556463	-0.845641
clbC	A0A2T3UGC6	Colibactin polyketide synthase ClbC OS=Escherichia coli OX=562 GN=clbC PE=4 SV=1 - [A0A2T3UGC6_ECOLX]	82.77	9.12	3	7	7	7	866	94.4941	5.49072	0.000173636	0.000312668	0.0027835	0.00299007	0.555336	-0.848566
eptA	A0A029HDV1	Phosphoethanolamine transferase eptA OS=Escherichia coli 2-005-03_S4_C3 OX=1444258 GN=eptA PE=4 SV=1 - [A0A029HDV1_ECOLX]	15.5	10.24	88	4	4	4	547	61.6638	7.28369	0.000170249	0.000306677	0.000524431	0.00133906	0.555142	-0.849071
raiA	A0A2J1D4J8	Ribosomal subunit interface protein (Fragment) OS=Escherichia coli OX=562 GN=raiA PE=4 SV=1 - [A0A2J1D4J8_ECOLX]	44.11	29.11	1	1	1	1	79	8.6985	6.27783	0.000163059	0.000293781	0.00727217	0.00491944	0.555034	-0.849351
AD23_1839	A0A029HXP6	Pertactin family protein OS=Escherichia coli 2-005-03_S4_C3 OX=1444258 GN=AD23_1839 PE=4 SV=1 - [A0A029HXP6_ECOLX]	311.495	20.81	14	1	7	14	418	42.8757	4.52588	0.000155486	0.000280356	0.00461608	0.00380358	0.554603	-0.850474
rplB	A0A0L7AI33	50S ribosomal protein L2 OS=Escherichia coli OX=562 GN=rplB PE=3 SV=1 - [A0A0L7AI33_ECOLX]	2531.85	53.48	7	2	13	177	273	29.798	10.8433	0.000163822	0.000295627	0.00724652	0.00490979	0.554151	-0.851649
murF	A0A0K4FIU4	UDP-N-acetylmuramoyl-tripeptide--D-alanyl-D-alanine ligase OS=Escherichia coli OX=562 GN=murF PE=3 SV=1 - [A0A0K4FIU4_ECOLX]	163.481	9.07	8	1	4	7	452	47.2966	5.80811	0.000173245	0.000312646	0.0141238	0.00741527	0.554124	-0.851718
fdxH	A0A066T5A6	Formate dehydrogenase OS=Escherichia coli OX=562 GN=fdxH PE=4 SV=1 - [A0A066T5A6_ECOLX]	436.906	34.33	34	4	9	22	300	33.0639	5.41455	0.000169643	0.000306364	0.00200513	0.00250392	0.553729	-0.852748
yidE	A0A061KJ29	Putative transport protein YidE OS=Escherichia coli OX=562 GN=yidE PE=3 SV=1 - [A0A061KJ29_ECOLX]	132.423	4.16	32	2	2	3	553	58.9241	8.52881	0.00016555	0.000299265	0.00404489	0.00356839	0.553187	-0.85416
AOX65_10345	A0A0T5XFA5	Uncharacterized protein OS=Escherichia coli OX=562 GN=AOX65_10345 PE=4 SV=1 - [A0A0T5XFA5_ECOLX]	27.32	10.74	1	1	1	1	121	12.7557	5.37646	0.000147964	0.000267659	0.0125911	0.00691631	0.55281	-0.855146
treA	V0AKL6	Periplasmic trehalase OS=Escherichia coli 909945-2 OX=1269007 GN=treA PE=3 SV=1 - [V0AKL6_ECOLX]	1006.94	52.35	22	2	19	63	554	62.3879	5.66846	0.000168847	0.00030548	0.00490043	0.0039205	0.552728	-0.855358
HMPREF9552_02332	D7X6S4	L-serine ammonia-lyase (Fragment) OS=Escherichia coli MS 198-1 OX=749549 GN=HMPREF9552_02332 PE=4 SV=1 - [D7X6S4_ECOLX]	120.416	17.01	58	7	8	13	441	47.2888	5.66846	0.000169627	0.000307055	0.0290339	0.0114937	0.552431	-0.856134
C6986_00285	A0A2T1N4G0	Type 3 dihydrofolate reductase (Fragment) OS=Escherichia coli OX=562 GN=C6986_00285 PE=4 SV=1 - [A0A2T1N4G0_ECOLX]	195.312	52.48	38	5	5	15	141	15.853	5.021	0.000166928	0.000302326	0.00119381	0.0019012	0.552147	-0.856876
rimO	A0A0K4LU86	Ribosomal protein S12 methylthiotransferase RimO OS=Escherichia coli OX=562 GN=rimO PE=3 SV=1 - [A0A0K4LU86_ECOLX]	87.71	13.38	29	5	5	7	441	49.6014	5.5542	0.00017115	0.000310005	0.00290707	0.00305762	0.552088	-0.85703
HMPREF9552_02947	D7X8H5	3-oxoacyl-(Acyl carrier protein) synthase II (Fragment) OS=Escherichia coli MS 198-1 OX=749549 GN=HMPREF9552_02947 PE=4 SV=1 - [D7X8H5_ECOLX]	48.7712	6.8	11	1	1	2	338	35.9644	5.14795	0.000179574	0.000325473	0.00149078	0.00214932	0.551733	-0.857957
ECW26_02050	I0VYR8	Protein CreA OS=Escherichia coli W26 OX=1090926 GN=ECW26_02050 PE=4 SV=1 - [I0VYR8_ECOLX]	400.974	63.89	18	8	8	24	144	15.5571	8.39697	0.000166481	0.000302147	0.0436591	0.0146233	0.550995	-0.85989
AD23_2407	A0A029HT77	Short chain dehydrogenase family protein OS=Escherichia coli 2-005-03_S4_C3 OX=1444258 GN=AD23_2407 PE=4 SV=1 - [A0A029HT77_ECOLX]	715.749	46.64	85	8	8	28	253	26.8768	5.59229	0.000163625	0.000297224	0.0322596	0.0122652	0.550509	-0.861161
fdnG	A0A2H3LU09	Formate dehydrogenase-N subunit alpha OS=Escherichia coli OX=562 GN=fdnG PE=3 SV=1 - [A0A2H3LU09_ECOLX]	502.804	31.53	27	1	25	40	1015	112.855	6.91748	0.000184342	0.000334886	0.0428589	0.0144676	0.550462	-0.861285
dapA	A0A026UK63	4-hydroxy-tetrahydrodipicolinate synthase OS=Escherichia coli O174:H8 str. 04-3038 OX=1446704 GN=dapA PE=3 SV=1 - [A0A026UK63_ECOLX]	1243.76	45.55	33	11	11	51	292	31.2221	6.44287	0.00016791	0.000305099	0.0195694	0.00902985	0.550347	-0.861586
C3K24_05815	A0A2L0MJ54	RNA polymerase subunit sigma-54 OS=Escherichia coli OX=562 GN=C3K24_05815 PE=4 SV=1 - [A0A2L0MJ54_ECOLX]	0	3.23	47	1	1	1	310	34.9464	6.7124	0.000160756	0.000292102	0.0116722	0.00661193	0.55034	-0.861605
BH694_11005	A0A066SWS6	Adenylosuccinate lyase OS=Escherichia coli OX=562 GN=BH694_11005 PE=3 SV=1 - [A0A066SWS6_ECOLX]	939.902	46.27	54	19	19	39	456	51.4916	5.99854	0.000165993	0.000301638	0.0328956	0.0124126	0.550305	-0.861696
grxB	I2XKA1	Glutaredoxin, GrxB family OS=Escherichia coli 2.3916 OX=869688 GN=grxB PE=4 SV=1 - [I2XKA1_ECOLX]	2811.25	74.88	4	2	15	140	215	24.3337	8.33838	0.000166905	0.000304112	0.0220248	0.00968379	0.548828	-0.865573
B2H83_06090	A0A1S6T9D6	CoA-binding protein OS=Escherichia coli M8 OX=1392854 GN=B2H83_06090 PE=4 SV=1 - [A0A1S6T9D6_ECOLX]	1448.41	68.61	23	3	8	57	137	14.6917	6.55127	0.000164352	0.000300002	0.0212202	0.00947481	0.547836	-0.868184
cobS	A0A2I5SPW7	Adenosylcobinamide-GDP ribazoletransferase OS=Escherichia coli OX=562 GN=cobS PE=3 SV=1 - [A0A2I5SPW7_ECOLX]	45.8	12.09	70	1	1	2	91	9.62126	8.22119	0.000185081	0.000338322	0.0305727	0.0118679	0.547057	-0.870238
SK85_04273	A0A0J2E3F5	Bifunctional aspartokinase/homoserine dehydrogenase OS=Escherichia coli OX=562 GN=SK85_04273 PE=3 SV=1 - [A0A0J2E3F5_ECOLX]	271.15	15.9	78	12	12	13	805	88.2914	5.64307	0.000168672	0.000308521	0.0238878	0.01015	0.54671	-0.871152
deoD	A0A2T1LPM3	Purine-nucleoside phosphorylase OS=Escherichia coli OX=562 GN=deoD PE=4 SV=1 - [A0A2T1LPM3_ECOLX]	4085.97	71.13	2	1	15	232	239	25.962	5.66846	0.000167051	0.00030567	0.0038532	0.0034942	0.546508	-0.871686
rimJ	B7MIK7	Ribosomal-protein-S5-alanine N-acetyltransferase OS=Escherichia coli O45:K1 (strain S88 / ExPEC) OX=585035 GN=rimJ PE=4 SV=1 - [B7MIK7_ECO45]	126.554	22.16	19	4	4	10	194	22.6593	9.14404	0.000165872	0.000303584	0.00104483	0.00178374	0.546379	-0.872027
creC	A0A125X9C5	Sensor protein CreC OS=Escherichia coli 1-110-08_S3_C1 OX=1444132 GN=creC PE=4 SV=1 - [A0A125X9C5_ECOLX]	19.37	1.69	3	1	1	1	474	52.2129	9.34912	0.000177363	0.000324681	0.00731521	0.00493556	0.546269	-0.872317
bamC	A0A2A2BYK7	Outer membrane protein assembly factor BamC OS=Escherichia coli OX=562 GN=bamC PE=3 SV=1 - [A0A2A2BYK7_ECOLX]	1237.28	56.4	50	1	14	59	344	36.8176	5.5542	0.000159734	0.000292447	0.00498579	0.00395427	0.546198	-0.872504
ECDEC1D_4550	H4JER3	Lipopolysaccharide core biosynthesis family protein OS=Escherichia coli DEC1D OX=868136 GN=ECDEC1D_4550 PE=4 SV=1 - [H4JER3_ECOLX]	0	22.08	35	1	2	2	77	9.08199	10.6675	0.000160273	0.000293831	0.00714461	0.00487115	0.54546	-0.874454
BET08_17785	A0A1V2T5Z6	Chorismate mutase (Fragment) OS=Escherichia coli OX=562 GN=BET08_17785 PE=4 SV=1 - [A0A1V2T5Z6_ECOLX]	49.4213	29.8	43	4	4	4	151	16.6678	5.09717	0.000165525	0.000303497	0.04168	0.0142433	0.545394	-0.874628
yaaA	A1A759	UPF0246 protein YaaA OS=Escherichia coli O1:K1 / APEC OX=405955 GN=yaaA PE=3 SV=1 - [YAAA_ECOK1]	185.605	38.76	42	6	6	11	258	29.5784	8.20654	0.000163728	0.00030034	0.0183639	0.00868568	0.545141	-0.8753
corC	P0AE79	Magnesium and cobalt efflux protein CorC OS=Escherichia coli O6:H1 (strain CFT073 / ATCC 700928 / UPEC) OX=199310 GN=corC PE=3 SV=1 - [CORC_ECOL6]	457.935	36.99	14	11	11	29	292	33.2775	4.70361	0.000165101	0.000302918	0.000686824	0.00149561	0.545034	-0.875581
WQ89_10405	A0A0L1C5B3	Phage late control protein OS=Escherichia coli OX=562 GN=WQ89_10405 PE=4 SV=1 - [A0A0L1C5B3_ECOLX]	20.85	2.98	1	1	1	1	369	41.1968	5.65576	0.000151938	0.000278934	0.0409927	0.0141126	0.544711	-0.876437
Q609_ECAC00250G0002	W1XE94	Uncharacterized protein (Fragment) OS=Escherichia coli DORA_A_5_14_21 OX=1403943 GN=Q609_ECAC00250G0002 PE=3 SV=1 - [W1XE94_ECOLX]	72.86	2.66	84	1	1	1	488	52.8987	7.1665	0.000154278	0.00028327	0.00720521	0.00489419	0.54463	-0.876651
miaA	A0A1X3KI97	tRNA dimethylallyltransferase OS=Escherichia coli H605 OX=656410 GN=miaA PE=3 SV=1 - [A0A1X3KI97_ECOLX]	399.005	31.01	2	1	8	23	316	35.0562	6.18896	0.000170965	0.000314008	0.0444235	0.0147699	0.544461	-0.8771
thrA	A0A0H3PVA3	Bifunctional aspartokinase/homoserine dehydrogenase OS=Escherichia coli O157:H7 (strain EC869) OX=478008 GN=thrA PE=3 SV=1 - [A0A0H3PVA3_ECO5C]	1750.71	48.17	107	27	27	70	818	88.7677	5.66846	0.000169951	0.000312244	0.00680853	0.00474022	0.544289	-0.877556
manA	B7M9W6	Mannose-6-phosphate isomerase OS=Escherichia coli O45:K1 (strain S88 / ExPEC) OX=585035 GN=manA PE=3 SV=1 - [B7M9W6_ECO45]	909.27	32.74	10	1	10	34	391	42.769	5.45264	0.000176242	0.000323946	0.0231777	0.00997465	0.544047	-0.878196
AC93_2346	A0A029IPW6	Helicase conserved C-terminal domain protein OS=Escherichia coli 2-005-03_S4_C2 OX=1444228 GN=AC93_2346 PE=4 SV=1 - [A0A029IPW6_ECOLX]	30.52	4.36	78	3	3	3	574	64.9694	7.72314	0.000165011	0.000303632	0.00277283	0.0029841	0.543456	-0.879765
msyB	B7MIJ3	Uncharacterized protein OS=Escherichia coli O45:K1 (strain S88 / ExPEC) OX=585035 GN=msyB PE=4 SV=1 - [B7MIJ3_ECO45]	3275.16	61.29	6	2	4	97	124	14.2653	3.72607	0.00017294	0.000318479	0.0133018	0.00715063	0.54302	-0.880923
poxB	A0A1D3U6K0	Pyruvate oxidase OS=Escherichia coli OX=562 GN=poxB PE=3 SV=1 - [A0A1D3U6K0_ECOLX]	1920.2	25.17	3	1	11	110	572	61.9726	6.60986	0.000153446	0.0002827	0.0168364	0.00822947	0.542789	-0.881538
yciI	A0A0K4HEV6	Putative cytoplasmic protein YciI OS=Escherichia coli OX=562 GN=yciI PE=4 SV=1 - [A0A0K4HEV6_ECOLX]	295.456	29.59	25	3	3	20	98	10.5864	5.12256	0.000167441	0.000308486	0.0162216	0.0080463	0.542781	-0.881557
yffB	A0A029INX6	Protein YffB OS=Escherichia coli 2-005-03_S4_C2 OX=1444228 GN=yffB PE=3 SV=1 - [A0A029INX6_ECOLX]	127.871	31.36	36	3	3	9	118	13.5499	7.28369	0.000162027	0.000298798	0.0266971	0.0108961	0.542262	-0.882937
azoR	A0A029I3R4	FMN-dependent NADH-azoreductase OS=Escherichia coli 2-005-03_S4_C3 OX=1444258 GN=azoR PE=3 SV=1 - [A0A029I3R4_ECOLX]	120.58	24.38	57	5	5	7	201	21.6424	5.38916	0.00017017	0.000313823	0.000762243	0.00155365	0.542248	-0.882975
NRG857_16865	A0A0H3EPW1	Transcriptional accessory protein OS=Escherichia coli O83:H1 (strain NRG 857C / AIEC) OX=685038 GN=NRG857_16865 PE=4 SV=1 - [A0A0H3EPW1_ECO8N]	616.52	34.41	17	2	22	41	773	85.0029	6.13818	0.000166207	0.000306744	0.00655072	0.00463597	0.541845	-0.884048
Q609_ECAC01083G0002	W1XA35	Toxin-antitoxin system, toxin component, HipA family (Fragment) OS=Escherichia coli DORA_A_5_14_21 OX=1403943 GN=Q609_ECAC01083G0002 PE=4 SV=1 - [W1XA35_ECOLX]	0	4.48	93	1	1	1	201	22.5448	6.21436	0.000176399	0.000326184	0.0169931	0.00827532	0.540796	-0.886844
AOX65_00565	A0A0T5XQV0	L-glyceraldehyde 3-phosphate reductase OS=Escherichia coli OX=562 GN=AOX65_00565 PE=4 SV=1 - [A0A0T5XQV0_ECOLX]	149.351	19.08	1	1	3	5	346	38.8066	7.02002	0.000153839	0.000285099	0.00355713	0.0033711	0.5396	-0.890038
purA	Q5MDB5	Adenylosuccinate dehydrogenase (Fragment) OS=Escherichia coli OX=562 GN=purA PE=3 SV=1 - [Q5MDB5_ECOLX]	951.777	58.95	29	1	12	49	229	25.0376	5.50342	0.000163933	0.000303837	0.0038318	0.00348566	0.539542	-0.890194
proS	A0A0K4FD11	Proline--tRNA ligase OS=Escherichia coli OX=562 GN=proS PE=3 SV=1 - [A0A0K4FD11_ECOLX]	2216.69	59.27	4	1	25	107	572	63.4747	5.22412	0.000157084	0.000291277	0.0304419	0.0118367	0.539296	-0.89085
BU64_13670	A0A070FEE5	Uncharacterized protein OS=Escherichia coli O128:H2 str. 2011C-3317 OX=1446581 GN=BU64_13670 PE=4 SV=1 - [A0A070FEE5_ECOLX]	134.288	45.38	48	6	6	8	119	13.552	9.92041	0.000163841	0.000303956	0.0381652	0.0135539	0.539029	-0.891566
cbpA	A0A0A1A6R1	Curved DNA-binding protein OS=Escherichia coli OX=562 GN=cbpA PE=3 SV=1 - [A0A0A1A6R1_ECOLX]	1716.36	46.08	42	14	14	84	306	34.4277	6.75635	0.000165494	0.000307091	0.0359563	0.0130923	0.53891	-0.891883
zwf	A0A070EV51	Glucose-6-phosphate 1-dehydrogenase OS=Escherichia coli O128:H2 str. 2011C-3317 OX=1446581 GN=zwf PE=3 SV=1 - [A0A070EV51_ECOLX]	1525.54	59.88	35	1	27	84	491	55.6834	5.88428	0.000171855	0.000319037	0.0234934	0.0100522	0.538668	-0.892533
Ec53638_3314	A0A0E1SWP7	Ribosomal subunit interface protein OS=Escherichia coli 53638 OX=344610 GN=Ec53638_3314 PE=4 SV=1 - [A0A0E1SWP7_ECOLX]	2863.54	69.03	19	6	6	91	113	12.8066	6.37939	0.000158926	0.000295074	0.00226368	0.00267308	0.538596	-0.892725
ydcF	A0A066SRJ5	YdcF family protein OS=Escherichia coli OX=562 GN=ydcF PE=4 SV=1 - [A0A066SRJ5_ECOLX]	163.925	31.95	20	1	7	13	266	29.629	5.73193	0.000168247	0.000312613	0.0182099	0.00864045	0.538196	-0.893795
ubiG	B7MXR3	Ubiquinone biosynthesis O-methyltransferase OS=Escherichia coli O81 (strain ED1a) OX=585397 GN=ubiG PE=3 SV=1 - [UBIG_ECO81]	138.595	30.83	65	5	5	6	240	26.5415	6.91748	0.00016261	0.000302386	0.0295174	0.0116128	0.537755	-0.894978
rpsC	E3PKZ8	30S ribosomal protein S3 OS=Escherichia coli O78:H11 (strain H10407 / ETEC) OX=316401 GN=rpsC PE=3 SV=1 - [E3PKZ8_ECOH1]	2745.47	61.64	4	1	12	119	232	25.8391	10.272	0.00015894	0.000295605	0.014592	0.00756057	0.537675	-0.895193
eda	A0A0A8U9E7	Multifunctional 2-keto-3-deoxygluconate 6-phosphate aldolase and 2-keto-4-hydroxyglutarate aldolase and oxaloacetate decarboxylase OS=Escherichia coli O26:H11 OX=244319 GN=eda PE=4 SV=1 - [A0A0A8U9E7_ECOLX]	808.048	58.69	28	3	11	50	213	22.269	7.09326	0.00016592	0.000309107	0.0130747	0.00707528	0.536771	-0.89762
CG701_27235	A0A2H9G3B3	Glutamate decarboxylase (Fragment) OS=Escherichia coli OX=562 GN=CG701_27235 PE=3 SV=1 - [A0A2H9G3B3_ECOLX]	20592.6	75.97	90	2	19	715	362	40.5432	5.74463	0.000157533	0.000293525	0.00390603	0.00351506	0.536692	-0.897834
HMPREF1604_02540	V0VBX0	Class III anaerobic ribonucleotide reductase small component domain protein OS=Escherichia coli 908519 OX=1268991 GN=HMPREF1604_02540 PE=4 SV=1 - [V0VBX0_ECOLX]	0	15.07	39	1	1	2	73	8.40546	7.34229	0.000165629	0.00030881	0.00192126	0.00245273	0.536346	-0.898763
BET08_02370	A0A1V2T0B4	Exodeoxyribonuclease I (Fragment) OS=Escherichia coli OX=562 GN=BET08_02370 PE=4 SV=1 - [A0A1V2T0B4_ECOLX]	283.163	27.79	203	13	13	19	439	50.2113	6.11279	0.000164522	0.000306884	0.0491631	0.0156515	0.536105	-0.899412
BET08_32975	A0A1V2T7N6	Uncharacterized protein (Fragment) OS=Escherichia coli OX=562 GN=BET08_32975 PE=3 SV=1 - [A0A1V2T7N6_ECOLX]	317.182	37.19	24	10	10	29	242	26.0497	4.88135	0.000163985	0.000305999	0.0281539	0.0112729	0.535901	-0.899961
EL76_0781	A0A0A0FIL2	Hydrogenase-2 large chain OS=Escherichia coli G3/10 OX=1455601 GN=EL76_0781 PE=3 SV=1 - [A0A0A0FIL2_ECOLX]	1419.35	53.44	49	1	20	74	567	62.4827	6.27783	0.000161372	0.00030183	0.0242643	0.0102423	0.534647	-0.903341
EL76_0563	A0A0A0FKM0	Putative ABC transporter ATP-binding protein YrbF OS=Escherichia coli G3/10 OX=1455601 GN=EL76_0563 PE=4 SV=1 - [A0A0A0FKM0_ECOLX]	347.676	38.29	21	1	6	13	269	29.1381	6.63916	0.000151231	0.000282924	0.00585757	0.00434459	0.534531	-0.903656
APT94_08430	A0A0D8WGE2	MarR family transcriptional regulator OS=Escherichia coli OX=562 GN=APT94_08430 PE=4 SV=1 - [A0A0D8WGE2_ECOLX]	44.08	11.76	2	1	1	1	85	9.6971	7.25439	0.000160416	0.000300586	0.0271786	0.0110222	0.533676	-0.905963
bioD	A0A2A3VZX9	ATP-dependent dethiobiotin synthetase BioD OS=Escherichia coli OX=562 GN=bioD PE=3 SV=1 - [A0A2A3VZX9_ECOLX]	0	5.78	1	1	1	1	225	24.0713	5.8335	0.000154626	0.000289845	0.0107606	0.00629062	0.533478	-0.906498
lptD	H4J367	LPS-assembly protein LptD OS=Escherichia coli DEC1D OX=868136 GN=lptD PE=3 SV=1 - [H4J367_ECOLX]	1224.2	51.23	18	2	31	70	773	88.3426	5.22412	0.000165603	0.000310444	0.00501225	0.00396463	0.53344	-0.906602
BMT53_10935	A0A066QZ82	4-hydroxybenzoyl-CoA thioesterase OS=Escherichia coli OX=562 GN=BMT53_10935 PE=4 SV=1 - [A0A066QZ82_ECOLX]	32.17	5.71	9	1	1	1	140	16.5993	6.53662	0.000159771	0.000299574	0.00181013	0.00238126	0.533328	-0.906905
gltX	Q0TF64	Glutamate--tRNA ligase OS=Escherichia coli O6:K15:H31 (strain 536 / UPEC) OX=362663 GN=gltX PE=3 SV=1 - [SYE_ECOL5]	1444.06	54.99	16	4	19	72	471	53.7648	6.01123	0.000156972	0.000294446	0.000163258	0.000724946	0.533109	-0.907498
bioD	A0A2H9AXT8	ATP-dependent dethiobiotin synthetase BioD OS=Escherichia coli OX=562 GN=bioD PE=3 SV=1 - [A0A2H9AXT8_ECOLX]	437.299	25.33	28	4	4	14	225	24.296	6.53662	0.000163505	0.000306814	0.000807816	0.00159661	0.532911	-0.908035
AZZ83_000225	B9VUA6	Efflux pump membrane transporter OS=Escherichia coli OX=562 GN=AZZ83_000225 PE=3 SV=1 - [B9VUA6_ECOLX]	1678.83	36.13	20	1	28	94	1049	113.477	5.56689	0.000162002	0.000304013	0.0406238	0.0140417	0.532879	-0.90812
asd	Q8FCR6	Aspartate-semialdehyde dehydrogenase OS=Escherichia coli O6:H1 (strain CFT073 / ATCC 700928 / UPEC) OX=199310 GN=asd PE=3 SV=2 - [DHAS_ECOL6]	1182.04	61.31	39	1	13	61	367	40.0055	5.57959	0.000158539	0.000297516	0.0130438	0.00706495	0.532875	-0.908132
grxB	A0A2K3TMB2	Glutaredoxin 2 OS=Escherichia coli OX=562 GN=grxB PE=4 SV=1 - [A0A2K3TMB2_ECOLX]	1838.55	74.42	5	2	14	117	215	24.3847	7.95752	0.000158409	0.000297445	0.00104782	0.00178577	0.532566	-0.908968
ddl_2	A0A023YSQ5	D-alanine--D-alanine ligase OS=Escherichia coli O145:H28 str. RM12581 OX=1248823 GN=ddl_2 PE=3 SV=1 - [A0A023YSQ5_ECOLX]	692.522	40.66	46	7	14	39	364	39.2722	5.18604	0.000157622	0.000296025	0.008701	0.00550815	0.532461	-0.909251
BXT93_03875	A0A1V2GL88	Two-component system response regulator (Fragment) OS=Escherichia coli OX=562 GN=BXT93_03875 PE=4 SV=1 - [A0A1V2GL88_ECOLX]	57.68	4.03	91	2	2	2	422	46.3312	5.30029	0.000157191	0.000295415	0.00207319	0.00254386	0.532101	-0.910228
erpA	B7NIB9	Iron-sulfur cluster insertion protein ErpA OS=Escherichia coli O7:K1 (strain IAI39 / ExPEC) OX=585057 GN=erpA PE=3 SV=1 - [ERPA_ECO7I]	511.694	33.33	8	3	3	19	114	12.0928	4.31006	0.000163683	0.000307682	0.0463914	0.0151444	0.531987	-0.910536
ECRM12581_11615	A0A023YY87	Exodeoxyribonuclease X OS=Escherichia coli O145:H28 str. RM12581 OX=1248823 GN=ECRM12581_11615 PE=4 SV=1 - [A0A023YY87_ECOLX]	34.86	10	39	2	2	2	220	25.1288	7.56201	0.000166242	0.000312598	0.00406363	0.00357543	0.531808	-0.911021
AC93_3761	A0A029IJM6	AsmA family protein OS=Escherichia coli 2-005-03_S4_C2 OX=1444228 GN=AC93_3761 PE=4 SV=1 - [A0A029IJM6_ECOLX]	1312.65	28.43	33	1	17	51	686	74.3662	8.19189	0.000169815	0.000319838	0.0169863	0.00827335	0.530941	-0.913378
deoC	A0A0B0VMS9	Deoxyribose-phosphate aldolase OS=Escherichia coli OX=562 GN=deoC PE=3 SV=1 - [A0A0B0VMS9_ECOLX]	2324.42	68.34	10	2	17	96	259	27.7323	5.73193	0.00016094	0.00030327	0.001053	0.00178929	0.530681	-0.914082
dedD	A0A2D0P4Z8	Uncharacterized protein OS=Escherichia coli O127:H6 OX=168807 GN=dedD PE=4 SV=1 - [A0A2D0P4Z8_ECOLX]	103.336	21.69	65	3	3	4	166	17.1311	8.77783	0.000163653	0.00030841	0.0084976	0.00542754	0.530635	-0.914209
dcd	A0A0K4UXE5	dCTP deaminase OS=Escherichia coli OX=562 GN=dcd PE=3 SV=1 - [A0A0K4UXE5_ECOLX]	252.541	33.68	13	8	8	17	193	21.249	5.90967	0.000162741	0.00030783	0.0176338	0.00846872	0.52867	-0.91956
BW70_11775	A0A026V0B3	Membrane protein OS=Escherichia coli O174:H8 str. 04-3038 OX=1446704 GN=BW70_11775 PE=4 SV=1 - [A0A026V0B3_ECOLX]	669.271	43.1	74	15	15	33	355	38.7767	6.85889	0.000161404	0.000305332	0.0113408	0.00649747	0.528619	-0.919701
JD73_15400	A0A085P036	DNA-specific endonuclease I OS=Escherichia coli OX=562 GN=JD73_15400 PE=4 SV=1 - [A0A085P036_ECOLX]	32.66	4.68	16	1	1	1	235	26.7579	8.95361	0.000172995	0.000327622	0.00433885	0.00368269	0.528033	-0.9213
btuB	A0A2G9BTR5	Vitamin B12 transporter BtuB OS=Escherichia coli OX=562 GN=btuB PE=3 SV=1 - [A0A2G9BTR5_ECOLX]	652.648	46.09	89	1	18	38	614	68.3314	5.74463	0.000159636	0.000302517	0.000522869	0.00133729	0.527692	-0.922232
Ec042-0260	Q5DY22	Putative glysosyltransferase OS=Escherichia coli OX=562 GN=Ec042-0260 PE=4 SV=1 - [Q5DY22_ECOLX]	32.96	1.46	1	1	1	1	823	93.892	8.11865	0.000165416	0.00031353	0.0201495	0.00918956	0.527592	-0.922505
coaBC	A0A2H9CSQ5	Deoxyuridine 5'-triphosphate nucleotidohydrolase OS=Escherichia coli OX=562 GN=coaBC PE=3 SV=1 - [A0A2H9CSQ5_ECOLX]	656.539	29.58	85	1	13	29	551	58.7375	5.85889	0.000156818	0.000297512	0.00392043	0.00352069	0.527099	-0.923855
Q609_ECAC00283G0001	W1XBJ7	Aspartokinase (Fragment) OS=Escherichia coli DORA_A_5_14_21 OX=1403943 GN=Q609_ECAC00283G0001 PE=3 SV=1 - [W1XBJ7_ECOLX]	276.93	22.82	55	8	8	16	412	44.2974	5.08447	0.000163169	0.000309649	0.000280413	0.000985386	0.526948	-0.924269
WE7_02002	S0W2L9	Lipoprotein OS=Escherichia coli KTE20 OX=1169339 GN=WE7_02002 PE=4 SV=1 - [S0W2L9_ECOLX]	1370.97	54.5	12	2	10	93	222	24.3824	7.91357	0.000156645	0.000297721	0.000117563	0.00061594	0.526147	-0.926461
pspB_2	A0A0A1AJ16	Probable phosphoglycerate mutase GpmB OS=Escherichia coli OX=562 GN=pspB_2 PE=3 SV=1 - [A0A0A1AJ16_ECOLX]	256.9	43.26	23	8	8	15	215	23.9762	5.33838	0.000161711	0.000308257	0.00267799	0.00293007	0.524596	-0.930721
nhaB	I0VNN1	Na(+)/H(+) antiporter NhaB OS=Escherichia coli W26 OX=1090926 GN=nhaB PE=3 SV=1 - [I0VNN1_ECOLX]	78.85	8.55	53	4	4	4	468	51.4375	6.22705	0.00015668	0.00029976	0.00380011	0.00347292	0.522686	-0.935984
A13A_03387	S1NYN2	Adenylate cyclase OS=Escherichia coli KTE182 OX=1181728 GN=A13A_03387 PE=4 SV=1 - [S1NYN2_ECOLX]	310.012	31.64	16	1	13	27	433	48.454	6.15088	0.000180245	0.000344953	0.00302825	0.00312117	0.522519	-0.936444
ECW26_11730	I0VW52	High-affinity gluconate transporter OS=Escherichia coli W26 OX=1090926 GN=ECW26_11730 PE=4 SV=1 - [I0VW52_ECOLX]	64.89	6.78	30	3	3	4	398	41.6913	7.48877	0.000153425	0.000293769	0.000930878	0.00170058	0.522263	-0.937153
phrB	A0A029J0G2	Deoxyribodipyrimidine photo-lyase OS=Escherichia coli 2-005-03_S4_C2 OX=1444228 GN=phrB PE=3 SV=1 - [A0A029J0G2_ECOLX]	60.3285	11.44	116	5	5	5	472	53.8031	7.37158	0.000157599	0.000301825	0.000489	0.00129744	0.522154	-0.937452
EC23916_5192	I2X9Z4	OmpW domain protein OS=Escherichia coli 2.3916 OX=869688 GN=EC23916_5192 PE=4 SV=1 - [I2X9Z4_ECOLX]	74.6733	65	6	1	2	6	40	4.70219	5.78271	0.000158049	0.000303008	0.00583216	0.00433363	0.5216	-0.938984
nupG	B8ZYD0	Nucleoside permease (Fragment) OS=Escherichia coli OX=562 GN=nupG PE=4 SV=1 - [B8ZYD0_ECOLX]	48.27	6.29	31	1	1	1	159	17.635	8.47021	0.000165673	0.000317635	0.00423462	0.00363796	0.521583	-0.939031
AZZ83_004456	A0A192EPZ5	Exodeoxyribonuclease III OS=Escherichia coli OX=562 GN=AZZ83_004456 PE=4 SV=1 - [A0A192EPZ5_ECOLX]	204.862	32.46	8	2	8	21	268	30.9016	6.3667	0.000147405	0.000282625	0.00388895	0.00350835	0.521556	-0.939105
hyaB	A0A0K4KYN7	Hydrogenase-1 large subunit OS=Escherichia coli OX=562 GN=hyaB PE=3 SV=1 - [A0A0K4KYN7_ECOLX]	2284.51	52.76	5	1	29	145	597	66.2921	6.04932	0.000151045	0.000289825	0.00560897	0.00423553	0.52116	-0.940203
upp	A0A2T7Y7P2	Uracil phosphoribosyltransferase OS=Escherichia coli OX=562 GN=upp PE=4 SV=1 - [A0A2T7Y7P2_ECOLX]	1837.33	88.48	12	11	11	62	191	20.5688	4.88135	0.000157896	0.000303498	3.93852e-05	0.000310924	0.520252	-0.942717
deoD	A7ZVS7	Purine nucleoside phosphorylase DeoD-type OS=Escherichia coli O139:H28 (strain E24377A / ETEC) OX=331111 GN=deoD PE=3 SV=1 - [DEOD_ECO24]	4672.36	80.75	18	3	17	256	239	25.933	5.65576	0.000156409	0.000300897	0.000650881	0.00146506	0.519807	-0.943951
BH694_07320	A0A066T0E2	Mannose-6-phosphate isomerase OS=Escherichia coli OX=562 GN=BH694_07320 PE=3 SV=1 - [A0A066T0E2_ECOLX]	932.645	32.74	18	1	10	35	391	42.739	5.56689	0.000160508	0.000309102	8.78182e-05	0.000522266	0.519274	-0.945432
AML07_24785	A0A0F3UXC1	Cytochrome bd-II oxidase subunit 1 OS=Escherichia coli OX=562 GN=AML07_24785 PE=4 SV=1 - [A0A0F3UXC1_ECOLX]	228.083	23.38	65	8	8	21	479	53.8376	7.02002	0.000158193	0.000304858	0.000384721	0.00115392	0.518907	-0.946452
yniB	A0A0H2YZ83	Uncharacterized protein OS=Escherichia coli O1:K1 / APEC OX=405955 GN=yniB PE=4 SV=1 - [A0A0H2YZ83_ECOK1]	141.38	10.67	31	2	2	5	178	20.3697	7.44482	0.000156779	0.00030218	0.0469501	0.0152486	0.518825	-0.94668
clsB	A0A2P6I5Q8	Cardiolipin synthase B OS=Escherichia coli OX=562 GN=clsB PE=3 SV=1 - [A0A2P6I5Q8_ECOLX]	30.4	6.05	56	2	2	2	413	47.5457	8.6167	0.000172802	0.000333157	0.0117374	0.00663417	0.518681	-0.947079
UC41_11465	A0A0D8WHR5	Glycerate kinase OS=Escherichia coli OX=562 GN=UC41_11465 PE=3 SV=1 - [A0A0D8WHR5_ECOLX]	0	2.36	2	1	1	1	381	39.156	5.10986	0.00015593	0.00030072	0.0153402	0.00778499	0.518524	-0.947517
CG692_25510	A0A2H9EIQ7	CoA-disulfide reductase OS=Escherichia coli OX=562 GN=CG692_25510 PE=4 SV=1 - [A0A2H9EIQ7_ECOLX]	0	1.99	1	1	1	1	552	59.4196	6.44287	0.000158395	0.000305509	0.0195653	0.00902873	0.518464	-0.947685
BZL69_13510	A0A244BKZ2	Glutamate decarboxylase OS=Escherichia coli OX=562 GN=BZL69_13510 PE=3 SV=1 - [A0A244BKZ2_ECOLX]	7412.24	59.8	3	2	8	229	204	22.7654	5.10986	0.000156544	0.000302359	0.0106551	0.00625211	0.517742	-0.949694
BX51_10850	A0A025CJY9	Uncharacterized protein OS=Escherichia coli O145:NM str. 2010C-3526 OX=1446596 GN=BX51_10850 PE=4 SV=1 - [A0A025CJY9_ECOLX]	447.987	46.05	29	7	7	27	215	23.77	5.37646	0.000155404	0.000300593	0.0413022	0.0141717	0.516993	-0.951782
garL	B7N0R8	5-keto-4-deoxy-D-glucarate aldolase OS=Escherichia coli O81 (strain ED1a) OX=585397 GN=garL PE=3 SV=1 - [B7N0R8_ECO81]	110.011	20.78	37	5	5	6	255	27.2671	6.29053	0.000167062	0.000323319	0.00432955	0.00367859	0.51671	-0.952572
yjiM	A0A024L8Z1	2-hydroxyglutaryl-CoA dehydratase D-component OS=Escherichia coli OX=562 GN=yjiM PE=4 SV=1 - [A0A024L8Z1_ECOLX]	115.368	23.24	108	7	7	8	383	42.7434	5.14795	0.00015479	0.000299649	0.00791688	0.00518924	0.51657	-0.952964
BK334_18750	A0A0A1A5D6	Alkyl hydroperoxide reductase OS=Escherichia coli OX=562 GN=BK334_18750 PE=3 SV=1 - [A0A0A1A5D6_ECOLX]	1433.92	48.75	11	4	21	69	521	56.1411	5.89697	0.000152108	0.000294516	0.00827867	0.00533915	0.516466	-0.953254
ade	A0A0K4AQL3	Adenine deaminase OS=Escherichia coli OX=562 GN=ade PE=3 SV=1 - [A0A0K4AQL3_ECOLX]	110.983	6.02	109	3	3	3	548	59.7332	5.50342	0.000155564	0.000301213	0.00115232	0.00186741	0.516459	-0.953275
AL530_014675	A0A136SJY3	Riboflavin synthase OS=Escherichia coli OX=562 GN=AL530_014675 PE=4 SV=1 - [A0A136SJY3_ECOLX]	527.396	53.99	13	2	10	40	213	23.429	6.21436	0.000154997	0.000300825	0.00254148	0.00284912	0.515238	-0.956689
AZZ83_001394	A0A192ETL3	PFL-like enzyme TdcE OS=Escherichia coli OX=562 GN=AZZ83_001394 PE=4 SV=1 - [A0A192ETL3_ECOLX]	2013.44	51.31	19	2	31	91	764	85.9592	5.78271	0.000158747	0.000308458	0.00163569	0.00225986	0.514648	-0.958343
C1I57_20440	A0A2R9W6C2	Uncharacterized protein (Fragment) OS=Escherichia coli OX=562 GN=C1I57_20440 PE=4 SV=1 - [A0A2R9W6C2_ECOLX]	67.0647	18.25	83	2	2	2	137	14.7007	8.00146	0.000168764	0.000328366	0.00800442	0.00522596	0.51395	-0.9603
C5P43_24395	A0A2S7HNI4	Uncharacterized protein (Fragment) OS=Escherichia coli OX=562 GN=C5P43_24395 PE=4 SV=1 - [A0A2S7HNI4_ECOLX]	0	23.6	121	2	2	2	89	10.1239	5.18604	0.000191566	0.000372934	0.0391243	0.0137473	0.513673	-0.961079
ECDEC1B_4949	H4IJU2	Na+/H+ antiporter OS=Escherichia coli DEC1B OX=868134 GN=ECDEC1B_4949 PE=4 SV=1 - [H4IJU2_ECOLX]	108.065	9.67	28	4	4	4	517	56.8978	5.77002	0.00016158	0.000314803	0.00206524	0.00253927	0.513272	-0.962204
metK	A0A1D3KM46	S-adenosylmethionine synthase OS=Escherichia coli OX=562 GN=metK PE=3 SV=1 - [A0A1D3KM46_ECOLX]	173.014	36.72	10	1	11	23	384	41.8812	5.26221	0.000157335	0.000306717	0.018487	0.0087216	0.512963	-0.963073
thiI	A0A066T5U9	tRNA sulfurtransferase OS=Escherichia coli OX=562 GN=thiI PE=3 SV=1 - [A0A066T5U9_ECOLX]	88.9414	10.79	53	6	6	8	482	54.9387	6.60986	0.000157982	0.000308353	0.00220103	0.00263076	0.512342	-0.964821
rpmE	A0A2B7MMK8	50S ribosomal protein L31 OS=Escherichia coli OX=562 GN=rpmE PE=3 SV=1 - [A0A2B7MMK8_ECOLX]	203.499	52.86	7	3	3	12	70	7.83891	9.31982	0.00013765	0.000268812	0.00971583	0.0058961	0.512069	-0.965591
yccK	A0A066RMH1	Sulfurtransferase OS=Escherichia coli OX=562 GN=yccK PE=3 SV=1 - [A0A066RMH1_ECOLX]	120.673	24.77	25	3	3	7	109	12.4015	8.63135	0.000153146	0.000299305	0.0345712	0.0127907	0.511674	-0.966704
gnd	A0A0K5YP96	6-phosphogluconate dehydrogenase, decarboxylating OS=Escherichia coli OX=562 GN=gnd PE=3 SV=1 - [A0A0K5YP96_ECOLX]	4776.95	76.28	89	2	28	169	468	51.4323	5.19873	0.000155775	0.000304756	0.0460684	0.0150836	0.511146	-0.968193
rplF	Q0TCF6	50S ribosomal protein L6 OS=Escherichia coli O6:K15:H31 (strain 536 / UPEC) OX=362663 GN=rplF PE=3 SV=1 - [RL6_ECOL5]	2288.15	80.23	11	1	12	112	177	18.8922	9.70068	0.000157611	0.000308714	0.00178742	0.00236612	0.51054	-0.969904
secY	A0A0K4VNG4	Protein translocase subunit SecY OS=Escherichia coli OX=562 GN=secY PE=3 SV=1 - [A0A0K4VNG4_ECOLX]	135.397	11.96	13	6	6	13	443	48.4852	9.89111	0.0001533	0.000300283	0.0377202	0.0134627	0.510517	-0.969969
cutA	B7MKU2	Divalent-cation tolerance protein CutA OS=Escherichia coli O45:K1 (strain S88 / ExPEC) OX=585035 GN=cutA PE=3 SV=1 - [CUTA_ECO45]	91.7502	33.04	22	2	2	4	112	12.3532	4.95752	0.000151413	0.000296654	0.00511375	0.00400607	0.510403	-0.970291
BH694_17570	A0A061YMX6	6-phospho-beta-glucosidase OS=Escherichia coli OX=562 GN=BH694_17570 PE=3 SV=1 - [A0A061YMX6_ECOLX]	953.47	51.57	198	23	23	61	477	54.9886	5.93506	0.000151952	0.000297765	0.0009333	0.00170247	0.510309	-0.970557
AZZ83_004519	A0A243UW83	Peptide/polyketide synthase OS=Escherichia coli OX=562 GN=AZZ83_004519 PE=4 SV=1 - [A0A243UW83_ECOLX]	46.3607	1.41	7	4	4	4	3194	350.992	6.20166	0.000164229	0.000322271	0.000355544	0.00111196	0.509598	-0.972569
icd	F8UPD0	Isocitrate dehydrogenase (Fragment) OS=Escherichia coli OX=562 GN=icd PE=4 SV=1 - [F8UPD0_ECOLX]	2436.63	72.6	6	1	17	152	208	23.5582	7.84033	0.00013316	0.000261859	0.0200939	0.00917441	0.508519	-0.975628
AZZ83_002975	A0A243UZL3	Filamentous hemagglutinin (Fragment) OS=Escherichia coli OX=562 GN=AZZ83_002975 PE=4 SV=1 - [A0A243UZL3_ECOLX]	151.759	2.44	45	5	5	5	3161	321.517	5.69385	0.000154718	0.000304649	0.000642392	0.00145755	0.507855	-0.977512
Ec53638_0201	A0A0E1SZ47	Putative lipoprotein OS=Escherichia coli 53638 OX=344610 GN=Ec53638_0201 PE=4 SV=1 - [A0A0E1SZ47_ECOLX]	658.085	52.69	10	1	7	22	186	20.4857	7.32764	0.000152589	0.000300757	0.000427906	0.00121748	0.507351	-0.978945
msrP	A0A2B7SXW1	Protein-methionine-sulfoxide reductase catalytic subunit MsrP OS=Escherichia coli OX=562 GN=msrP PE=3 SV=1 - [A0A2B7SXW1_ECOLX]	205.349	43.11	15	10	10	17	334	37.3604	9.15869	0.000151787	0.000299192	0.000259186	0.00094375	0.507322	-0.979026
Q609_ECAC00344G0001	W1XBF8	Uncharacterized protein (Fragment) OS=Escherichia coli DORA_A_5_14_21 OX=1403943 GN=Q609_ECAC00344G0001 PE=4 SV=1 - [W1XBF8_ECOLX]	0	5.85	22	1	1	3	171	18.923	9.14404	0.000156459	0.000308761	0.000957282	0.00172087	0.506731	-0.980709
Q609_ECAC01958G0001	W1WLC1	Sensor dcuS protein (Fragment) OS=Escherichia coli DORA_A_5_14_21 OX=1403943 GN=Q609_ECAC01958G0001 PE=4 SV=1 - [W1WLC1_ECOLX]	27.41	5.3	70	1	1	1	151	16.1573	4.89404	0.000158951	0.000313864	0.00168154	0.00229294	0.506434	-0.981553
avtA	A0A2T1MKT3	Valine--pyruvate transaminase (Fragment) OS=Escherichia coli OX=562 GN=avtA PE=4 SV=1 - [A0A2T1MKT3_ECOLX]	32.09	15.89	73	2	2	2	107	12.7286	7.50342	0.000156709	0.000309489	0.00747057	0.00499855	0.506348	-0.981798
C1I57_27815	A0A2R9W2E2	Pyrimidine utilization regulatory protein R (Fragment) OS=Escherichia coli OX=562 GN=C1I57_27815 PE=4 SV=1 - [A0A2R9W2E2_ECOLX]	143.783	11.35	38	2	2	4	185	20.4779	8.88037	0.000153623	0.000303641	0.00102272	0.00176847	0.505936	-0.982974
ERS085411_03181	A0A0K4RCE6	DNA-binding protein OS=Escherichia coli OX=562 GN=ERS085411_03181 PE=4 SV=1 - [A0A0K4RCE6_ECOLX]	42.5	19.5	6	3	3	3	159	17.3002	9.49561	0.000146615	0.00028986	0.000608085	0.0014259	0.505815	-0.983319
kdsB_1	A0A2G8Z744	3-deoxy-manno-octulosonate cytidylyltransferase OS=Escherichia coli OX=562 GN=kdsB_1 PE=3 SV=1 - [A0A2G8Z744_ECOLX]	162.587	54.84	39	3	11	16	248	27.6262	5.50342	0.00015935	0.000315139	0.0351514	0.0129182	0.505652	-0.983784
BHF46_07235	A0A1E5X149	Preprotein translocase subunit SecG OS=Escherichia coli OX=562 GN=BHF46_07235 PE=4 SV=1 - [A0A1E5X149_ECOLX]	74.6253	27.27	17	2	2	6	110	11.3719	6.59521	0.000150921	0.000298689	0.00307455	0.00314478	0.505279	-0.984848
C6985_20190	A0A2T1LF87	50S ribosomal protein L2 OS=Escherichia coli OX=562 GN=C6985_20190 PE=4 SV=1 - [A0A2T1LF87_ECOLX]	2171.81	46.89	2	1	12	149	273	29.802	10.9312	0.000156087	0.000309122	0.0297602	0.0116722	0.504938	-0.985822
purA	A0A161QWB8	Adenylosuccinate synthetase OS=Escherichia coli OX=562 GN=purA PE=3 SV=1 - [A0A161QWB8_ECOLX]	4222.98	70.6	61	14	25	167	432	47.3293	5.49072	0.000154692	0.000306541	0.0324973	0.0123205	0.504636	-0.986686
EC236275_4418	E3XTM4	HTH-type transcriptional regulator ebgR OS=Escherichia coli 2362-75 OX=670897 GN=EC236275_4418 PE=4 SV=1 - [E3XTM4_ECOLX]	49.46	9.8	61	2	3	4	306	34.0917	6.13818	0.000151261	0.00029976	0.00258816	0.00287721	0.504607	-0.986769
AL530_005325	A0A136SAR8	Aerobic respiration control sensor protein OS=Escherichia coli OX=562 GN=AL530_005325 PE=4 SV=1 - [A0A136SAR8_ECOLX]	368.189	21.85	9	1	16	30	778	87.8977	5.12256	0.000159291	0.000316085	0.00377484	0.00346267	0.503951	-0.988645
ECDEC1C_4648	H4IZL6	LysE type translocator family protein OS=Escherichia coli DEC1C OX=868135 GN=ECDEC1C_4648 PE=4 SV=1 - [H4IZL6_ECOLX]	110.39	8.7	13	1	1	2	161	17.5496	10.4331	0.00015234	0.000302318	0.0288105	0.0114381	0.503908	-0.988768
HMPREF1604_02364	V0VEB7	4Fe-4S binding domain protein OS=Escherichia coli 908519 OX=1268991 GN=HMPREF1604_02364 PE=4 SV=1 - [V0VEB7_ECOLX]	171.091	39.1	42	9	9	21	289	32.0625	6.85889	0.00015301	0.000303692	0.0027573	0.00297538	0.503834	-0.988981
AZZ83_000467	A0A192ELK2	Phospho-2-dehydro-3-deoxyheptonate aldolase OS=Escherichia coli OX=562 GN=AZZ83_000467 PE=3 SV=1 - [A0A192ELK2_ECOLX]	732.336	57.71	66	3	16	41	350	37.9855	6.46826	0.000150766	0.000300455	0.000331038	0.00107385	0.501794	-0.994833
BIZ41_02690	A0A271RDF5	Aspartate ammonia-lyase OS=Escherichia coli OX=562 GN=BIZ41_02690 PE=3 SV=1 - [A0A271RDF5_ECOLX]	3702.46	50.1	45	14	21	197	477	52.1945	5.2876	0.000154015	0.000307009	0.00687395	0.00476614	0.501663	-0.99521
C1I57_30680	A0A2R9W0U4	Iron export ABC transporter permease subunit FetB (Fragment) OS=Escherichia coli OX=562 GN=C1I57_30680 PE=4 SV=1 - [A0A2R9W0U4_ECOLX]	75.15	18.3	32	3	3	3	153	16.502	9.75928	0.000152508	0.00030408	3.18861e-06	0.000104816	0.501539	-0.995566
napA	W1X296	Periplasmic nitrate reductase OS=Escherichia coli DORA_A_5_14_21 OX=1403943 GN=napA PE=3 SV=1 - [W1X296_ECOLX]	265.945	22.51	76	16	16	28	804	90.6546	7.50342	0.000156684	0.000313605	0.000322242	0.00105947	0.499623	-1.00109
ubiF	A0A192EMW6	2-octaprenyl-3-methyl-6-methoxy-1,4-benzoquinol hydroxylase OS=Escherichia coli OX=562 GN=ubiF PE=4 SV=1 - [A0A192EMW6_ECOLX]	143.306	26.6	100	2	9	12	391	42.9711	7.66455	0.000151606	0.000303749	0.0461722	0.0151031	0.499117	-1.00255
AL530_015575	A0A210NXJ8	Fimbrial biogenesis outer membrane usher protein OS=Escherichia coli OX=562 GN=AL530_015575 PE=3 SV=1 - [A0A210NXJ8_ECOLX]	49.73	4.42	125	4	4	5	883	96.6033	6.37939	0.000147237	0.00029515	0.00208825	0.00255251	0.498856	-1.00331
AL530_014040	A0A178QU95	Putative glucose-6-phosphate 1-epimerase OS=Escherichia coli OX=562 GN=AL530_014040 PE=3 SV=1 - [A0A178QU95_ECOLX]	564.005	43.2	96	2	10	38	294	32.6727	6.22705	0.000151724	0.000304258	0.0140923	0.00740537	0.498668	-1.00385
wecB	I2RW48	UDP-N-acetylglucosamine 2-epimerase OS=Escherichia coli 97.0246 OX=869670 GN=wecB PE=3 SV=1 - [I2RW48_ECOLX]	126.052	25.27	8	1	8	10	376	42.2059	6.354	0.000167756	0.000336618	0.0422715	0.0143542	0.498358	-1.00475
katG	A0A2T1LCW3	Catalase/peroxidase HPI OS=Escherichia coli OX=562 GN=katG PE=4 SV=1 - [A0A2T1LCW3_ECOLX]	2065.44	34.57	4	1	20	118	726	79.6528	5.42725	0.000147596	0.000296249	0.0123993	0.00685431	0.498214	-1.00516
lpxD	B7UJ80	UDP-3-O-(3-hydroxymyristoyl)glucosamine N-acyltransferase OS=Escherichia coli O127:H6 (strain E2348/69 / EPEC) OX=574521 GN=lpxD PE=3 SV=1 - [B7UJ80_ECO27]	409.925	25.81	35	2	7	21	341	35.9764	6.53662	0.000146338	0.000293869	7.60165e-05	0.000479008	0.49797	-1.00587
hda	A0A094VSK4	DnaA regulatory inactivator Hda OS=Escherichia coli OX=562 GN=hda PE=3 SV=1 - [A0A094VSK4_ECOLX]	35.16	13.33	20	3	3	3	225	25.7914	5.51611	0.000149545	0.000300914	0.00573236	0.00429015	0.496969	-1.00877
tdcF	A0A0K3YW08	TdcF protein OS=Escherichia coli OX=562 GN=tdcF PE=4 SV=1 - [A0A0K3YW08_ECOLX]	478.146	54.26	28	5	6	32	129	13.9973	5.47803	0.000153282	0.000308464	0.0187349	0.0087934	0.49692	-1.00892
minC	A0A024KVA6	Probable septum site-determining protein MinC OS=Escherichia coli D6-113.11 OX=1400022 GN=minC PE=3 SV=1 - [A0A024KVA6_ECOLX]	127.995	29	29	7	7	11	231	24.7579	6.87354	0.000148787	0.000299829	0.0178798	0.00854254	0.49624	-1.01089
C1I57_29580	A0A2R9W1E3	Proline/glycine betaine ABC transporter ATP-binding protein ProV (Fragment) OS=Escherichia coli OX=562 GN=C1I57_29580 PE=4 SV=1 - [A0A2R9W1E3_ECOLX]	80.4419	20.45	48	5	5	6	357	39.5638	5.80811	0.000157676	0.000317923	0.00272194	0.00295533	0.495955	-1.01172
yeeA_2	A0A0K3MDZ3	Inner membrane protein OS=Escherichia coli OX=562 GN=yeeA_2 PE=4 SV=1 - [A0A0K3MDZ3_ECOLX]	0	8.59	50	3	3	3	256	29.1345	8.88037	0.000147648	0.000297874	0.00470755	0.00384195	0.495672	-1.01254
pflB	A0A2T1LLW8	Formate C-acetyltransferase OS=Escherichia coli OX=562 GN=pflB PE=4 SV=1 - [A0A2T1LLW8_ECOLX]	7182.47	41.58	4	3	28	335	760	84.9554	5.99854	0.000151861	0.000306507	0.00423812	0.00363921	0.495456	-1.01317
JD73_06915	A0A085PAV1	Glycine/betaine ABC transporter OS=Escherichia coli OX=562 GN=JD73_06915 PE=4 SV=1 - [A0A085PAV1_ECOLX]	245.502	15.8	41	7	7	15	500	54.8821	7.00537	0.000147767	0.000298281	0.00133906	0.00202279	0.495394	-1.01335
AC84_5479	A0A074HYV7	Outer membrane porin protein ompD OS=Escherichia coli 1-392-07_S4_C1 OX=1444219 GN=AC84_5479 PE=3 SV=1 - [A0A074HYV7_ECOLX]	1468.98	42.44	100	1	10	96	344	38.02	4.729	0.000149096	0.000301166	0.000324355	0.00106296	0.495063	-1.01432
yacL	A0A0L7ALL1	UPF0231 protein YacL OS=Escherichia coli OX=562 GN=yacL PE=3 SV=1 - [A0A0L7ALL1_ECOLX]	142.809	25.83	12	1	2	6	120	13.9555	4.43701	0.00015643	0.000316205	0.000717285	0.00151998	0.49471	-1.01535
AW059_06445	A0A085P1L2	Peroxidase OS=Escherichia coli OX=562 GN=AW059_06445 PE=4 SV=1 - [A0A085P1L2_ECOLX]	735.471	54.52	39	14	14	36	299	33.1235	5.5415	0.000152036	0.000307465	0.0158426	0.00793064	0.494482	-1.01601
rfe	A0A2D0NX61	UDP-GlcNAc: undecaprenylphosphate GlcNAc-1-phosphate transferase OS=Escherichia coli O127:H6 OX=168807 GN=rfe PE=4 SV=1 - [A0A2D0NX61_ECOLX]	0	3.5	38	1	1	1	257	28.9585	10.0815	0.000147015	0.000297311	0.00780771	0.00514304	0.494481	-1.01601
CSC15_0003	A0A2T7Y0C4	Dimethyl sulfoxide reductase DmsA domain protein OS=Escherichia coli OX=562 GN=CSC15_0003 PE=4 SV=1 - [A0A2T7Y0C4_ECOLX]	0	13.11	1	1	1	1	61	7.04953	9.45166	0.000157922	0.000319668	0.000386167	0.00115591	0.494019	-1.01736
EC1094V2_534	A0A222AM59	L-serine dehydratase, beta subunit / L-serine dehydratase, alpha subunit OS=Escherichia coli OX=562 GN=EC1094V2_534 PE=4 SV=1 - [A0A222AM59_ECOLX]	98.5071	6.71	76	2	3	7	432	46.2483	6.06201	0.000156758	0.000317337	0.0073003	0.00492999	0.49398	-1.01748
JD73_20150	A0A085P2L6	D-mannonate oxidoreductase OS=Escherichia coli OX=562 GN=JD73_20150 PE=3 SV=1 - [A0A085P2L6_ECOLX]	236.621	20.9	126	1	9	13	488	53.9535	6.29053	0.00013566	0.000274906	0.0290476	0.0114971	0.493477	-1.01895
cscR	P62604	Sucrose operon repressor OS=Escherichia coli OX=562 GN=cscR PE=3 SV=1 - [CSCR_ECOLX]	18.28	7.25	3	3	3	4	331	36.4477	6.53662	0.000153918	0.000312199	0.0188048	0.00881354	0.493013	-1.0203
thrS	A0A037Y430	Threonine--tRNA ligase OS=Escherichia coli OX=562 GN=thrS PE=3 SV=1 - [A0A037Y430_ECOLX]	1805.95	39.88	39	26	26	99	642	73.9528	6.18896	0.000153074	0.000310501	0.00319291	0.00320355	0.492991	-1.02037
C6986_35015	A0A2T1ML91	N-acetylmuramoyl-L-alanine amidase (Fragment) OS=Escherichia coli OX=562 GN=C6986_35015 PE=4 SV=1 - [A0A2T1ML91_ECOLX]	64.3672	3.54	53	1	1	2	226	24.6088	9.26123	0.000152983	0.000311019	0.0119146	0.00669405	0.491877	-1.02363
UN91_28840	A0A0F3TY56	Ferritin OS=Escherichia coli OX=562 GN=UN91_28840 PE=3 SV=1 - [A0A0F3TY56_ECOLX]	858.397	50.3	27	8	8	55	165	19.4264	4.83057	0.000152398	0.000310517	0.00810824	0.00526914	0.490787	-1.02683
AU473_13035	A0A1I9X2J8	NAD(P)H dehydrogenase (quinone) OS=Escherichia coli OX=562 GN=AU473_13035 PE=3 SV=1 - [A0A1I9X2J8_ECOLX]	5955.81	56.77	10	1	8	167	192	20.1661	6.53662	0.000145311	0.00029619	0.0366521	0.0132402	0.4906	-1.02738
psd	A0A070T7Z9	Phosphatidylserine decarboxylase proenzyme OS=Escherichia coli 2-210-07_S3_C3 OX=1444180 GN=psd PE=3 SV=1 - [A0A070T7Z9_ECOLX]	623.435	38.82	12	3	10	31	322	35.8326	6.16357	0.000149389	0.000304955	0.000605176	0.00142312	0.489873	-1.02952
Q609_ECAC01933G0001	W1WQ16	DNase TatD (Fragment) OS=Escherichia coli DORA_A_5_14_21 OX=1403943 GN=Q609_ECAC01933G0001 PE=4 SV=1 - [W1WQ16_ECOLX]	33.18	9.86	66	1	1	1	71	7.77878	6.50732	0.000146177	0.000300251	0.0101069	0.00604723	0.486848	-1.03846
hemL	A0A061KSA6	Glutamate-1-semialdehyde 2,1-aminomutase OS=Escherichia coli OX=562 GN=hemL PE=3 SV=1 - [A0A061KSA6_ECOLX]	1547.31	40.38	54	13	13	63	426	45.3994	4.90674	0.000144642	0.000297766	0.000568211	0.00138635	0.485756	-1.0417
tnaA	A0A0E1T0E1	Tryptophanase OS=Escherichia coli 53638 OX=344610 GN=tnaA PE=3 SV=1 - [A0A0E1T0E1_ECOLX]	4160.4	68.15	10	1	27	206	471	52.7386	6.39209	0.000144089	0.00029678	0.000195151	0.000803751	0.485506	-1.04244
ppa	A0A1X7BAS8	Inorganic pyrophosphatase OS=Escherichia coli OX=562 GN=ppa PE=3 SV=1 - [A0A1X7BAS8_ECOLX]	1115.41	54.55	5	2	12	96	176	19.7351	5.17334	0.000141033	0.000290536	0.0213758	0.00951528	0.485423	-1.04268
sodB	A0A0H3MKB4	Superoxide dismutase OS=Escherichia coli O7:K1 (strain IAI39 / ExPEC) OX=585057 GN=sodB PE=3 SV=1 - [A0A0H3MKB4_ECO7I]	2192.17	78.76	4	2	9	96	193	21.2516	6.40479	0.000148822	0.0003073	0.00358813	0.00338451	0.48429	-1.04606
CR539_06775	A0A2I6EX35	Paraslipin OS=Escherichia coli OX=562 GN=CR539_06775 PE=4 SV=1 - [A0A2I6EX35_ECOLX]	924.304	64.26	16	3	14	60	305	33.7527	5.64307	0.000150098	0.000309971	3.91667e-05	0.00030995	0.484232	-1.04623
CVH05_23340	A0A2J0QBV9	Glutamate decarboxylase (Fragment) OS=Escherichia coli OX=562 GN=CVH05_23340 PE=3 SV=1 - [A0A2J0QBV9_ECOLX]	21184.5	75.95	77	1	22	769	370	41.7067	5.49072	0.000142173	0.000293632	0.000672683	0.00148383	0.484186	-1.04637
copA	A0A192ELK9	Copper-exporting P-type ATPase A OS=Escherichia coli OX=562 GN=copA PE=3 SV=1 - [A0A192ELK9_ECOLX]	1189.85	39.81	115	23	23	52	834	87.8989	5.51611	0.00014618	0.000301972	0.00846575	0.00541479	0.484085	-1.04667
ydiU	A0A0V9S4T5	UPF0061 protein YdiU OS=Escherichia coli OX=562 GN=ydiU PE=3 SV=1 - [A0A0V9S4T5_ECOLX]	55.1282	5.44	133	3	3	3	478	54.518	5.87158	0.00015073	0.000312263	0.00707708	0.00484528	0.482701	-1.0508
Q609_ECAC01943G0001	W1WPR8	Sodium/glutamate symport carrier protein (Fragment) OS=Escherichia coli DORA_A_5_14_21 OX=1403943 GN=Q609_ECAC01943G0001 PE=4 SV=1 - [W1WPR8_ECOLX]	61.259	11	22	2	2	4	309	32.4977	8.27979	0.00014151	0.000294604	0.00315925	0.00318707	0.480341	-1.05787
AZZ83_002884	A0A192EXT7	Glucohydrolase OS=Escherichia coli OX=562 GN=AZZ83_002884 PE=4 SV=1 - [A0A192EXT7_ECOLX]	206.219	15.25	125	8	8	11	551	63.8391	5.5542	0.000155689	0.00032435	0.0184588	0.00871339	0.480004	-1.05888
thiL	A0A0K3Y186	Thiamine-monophosphate kinase OS=Escherichia coli OX=562 GN=thiL PE=3 SV=1 - [A0A0K3Y186_ECOLX]	40.37	7.38	6	2	3	3	325	34.9907	4.77979	0.000140946	0.000294201	0.0248651	0.010401	0.479079	-1.06166
A1WU_03504	S1IJZ3	Superoxide dismutase OS=Escherichia coli KTE108 OX=1182704 GN=A1WU_03504 PE=3 SV=1 - [S1IJZ3_ECOLX]	2537.81	80.31	12	1	9	115	193	21.2515	6.17627	0.000147214	0.000307364	0.00967133	0.00587862	0.478955	-1.06204
C1I57_35735	A0A2R9VY59	Chemotaxis protein CheY (Fragment) OS=Escherichia coli OX=562 GN=C1I57_35735 PE=4 SV=1 - [A0A2R9VY59_ECOLX]	181.861	29.13	13	2	2	7	127	13.9002	4.98291	0.000143051	0.000298692	0.000885129	0.00166382	0.478924	-1.06213
nanA	A0A027U3Z5	N-acetylneuraminate lyase OS=Escherichia coli O111:NM str. K6722 OX=1446533 GN=nanA PE=3 SV=1 - [A0A027U3Z5_ECOLX]	239.23	26.26	35	7	7	13	297	32.6028	5.89697	0.000154548	0.0003237	0.0255116	0.0105785	0.477441	-1.06661
hisB	A0A1X3KCP4	Histidine biosynthesis bifunctional protein HisB OS=Escherichia coli H461 OX=656403 GN=hisB PE=3 SV=1 - [A0A1X3KCP4_ECOLX]	526.69	36.06	68	3	9	29	355	40.2773	6.17627	0.000143652	0.000301498	0.0230823	0.00995105	0.476461	-1.06957
deoA	A0A192EZ12	Thymidine phosphorylase OS=Escherichia coli OX=562 GN=deoA PE=3 SV=1 - [A0A192EZ12_ECOLX]	2308.35	65.68	12	3	25	113	440	47.176	5.31299	0.000144583	0.000303992	1.16022e-05	0.00016488	0.475614	-1.07214
asnB	A0A2S5U6B3	Asparagine synthase B OS=Escherichia coli OX=562 GN=asnB PE=4 SV=1 - [A0A2S5U6B3_ECOLX]	902.962	37.55	21	1	17	43	554	62.6181	5.94775	0.000148847	0.000313301	0.00723394	0.00490505	0.475093	-1.07372
sohA	A0A0K4DCM8	HtrA suppressor protein OS=Escherichia coli OX=562 GN=sohA PE=4 SV=1 - [A0A0K4DCM8_ECOLX]	70.2681	42.34	35	4	4	5	111	12.3282	4.94482	0.000145706	0.000306929	0.00398819	0.00354688	0.474723	-1.07484
thiJ	D3GUC0	4-methyl-5(B-hydroxyethyl)-thiazole monophosphate biosynthesis protein OS=Escherichia coli O44:H18 (strain 042 / EAEC) OX=216592 GN=thiJ PE=4 SV=1 - [D3GUC0_ECO44]	473.472	26.16	51	4	4	17	172	18.4717	6.771	0.000144704	0.000305087	0.0133481	0.00716586	0.474303	-1.07612
iadA	A0A0V9S802	Isoaspartyl dipeptidase OS=Escherichia coli OX=562 GN=iadA PE=3 SV=1 - [A0A0V9S802_ECOLX]	699.833	45.38	13	1	12	28	390	41.0312	5.26221	0.000139109	0.000293313	0.000708466	0.00151306	0.474268	-1.07623
BET08_35585	A0A1V2T5S2	Aminodeoxychorismate synthase component II (Fragment) OS=Escherichia coli OX=562 GN=BET08_35585 PE=4 SV=1 - [A0A1V2T5S2_ECOLX]	40.7	5.99	40	1	1	1	167	18.4655	6.52197	0.000156353	0.000330065	0.0191185	0.0089031	0.473703	-1.07794
PPECC33_04250	A0A0G3KEC4	Putative dehydrogenase OS=Escherichia coli PCN033 OX=1001989 GN=PPECC33_04250 PE=4 SV=1 - [A0A0G3KEC4_ECOLX]	27.61	2.68	12	1	1	1	336	35.9535	6.27783	0.000148955	0.000314869	0.0157701	0.00790981	0.473069	-1.07988
EL75_0685	A0A0A0FXV8	Hydrogenase-2 small chain OS=Escherichia coli OX=562 GN=EL75_0685 PE=4 SV=1 - [A0A0A0FXV8_ECOLX]	234.318	19.21	21	7	7	16	354	37.5618	6.66846	0.000143521	0.000303743	0.00428916	0.00366069	0.472506	-1.08159
ahpC	P0AE09	Alkyl hydroperoxide reductase C OS=Escherichia coli O6:H1 (strain CFT073 / ATCC 700928 / UPEC) OX=199310 GN=ahpC PE=3 SV=2 - [AHPC_ECOL6]	2481.32	71.12	9	10	13	122	187	20.7484	5.17334	0.000143106	0.000303172	0.00296297	0.00308725	0.47203	-1.08305
murI	A0A234XVH5	Glutamate racemase OS=Escherichia coli OX=562 GN=murI PE=3 SV=1 - [A0A234XVH5_ECOLX]	168.125	32.63	54	1	7	8	285	31.1022	5.18604	0.000133066	0.000281907	0.0150065	0.00768603	0.472023	-1.08307
G925_04481	A0A0E2KXG5	Fumarate reductase flavoprotein subunit OS=Escherichia coli (strain UMEA 3162-1) OX=1281200 GN=G925_04481 PE=3 SV=1 - [A0A0E2KXG5_ECOU3]	5054.66	60.96	30	3	33	233	602	65.9476	6.27783	0.000144311	0.000306276	0.00933672	0.00575113	0.471181	-1.08565
ybcJ	A0A024KVG9	Uncharacterized protein OS=Escherichia coli D6-113.11 OX=1400022 GN=ybcJ PE=4 SV=1 - [A0A024KVG9_ECOLX]	112.22	40	34	3	3	4	70	7.38388	8.54346	0.00014565	0.000309558	0.0296755	0.0116515	0.470511	-1.0877
AC93_3215	A0A029IL82	Aldo/keto reductase family protein OS=Escherichia coli 2-005-03_S4_C2 OX=1444228 GN=AC93_3215 PE=4 SV=1 - [A0A029IL82_ECOLX]	254.532	50	20	2	13	22	346	38.8457	6.81494	0.000132387	0.0002815	0.0293612	0.0115745	0.470293	-1.08837
cspA	P0A9Y1	Cold shock protein CspA OS=Escherichia coli O157:H7 OX=83334 GN=cspA PE=3 SV=2 - [CSPA_ECO57]	74.6277	31.43	4	1	2	4	70	7.39863	5.94775	0.000145141	0.000308748	0.0132624	0.00713763	0.470096	-1.08897
putA	A0A178RG61	Bifunctional protein PutA OS=Escherichia coli OX=562 GN=putA PE=3 SV=1 - [A0A178RG61_ECOLX]	2781.52	47.5	162	47	47	147	1320	143.722	5.84619	0.000141841	0.000301955	0.0196237	0.00904497	0.469742	-1.09006
WQ89_17170	A0A0L1C1J7	Lipoprotein OS=Escherichia coli OX=562 GN=WQ89_17170 PE=4 SV=1 - [A0A0L1C1J7_ECOLX]	658.085	52.69	8	1	7	22	186	20.4857	7.32764	0.000145169	0.000309975	0.000366434	0.00112804	0.468325	-1.09442
AZZ83_003095	A0A234VZE5	Phage transcriptional regulator OS=Escherichia coli OX=562 GN=AZZ83_003095 PE=4 SV=1 - [A0A234VZE5_ECOLX]	50.7664	10.23	26	2	2	3	215	23.8292	5.19873	0.000143411	0.000306278	0.000205964	0.000829141	0.468237	-1.09469
EC970246_3827	I2RR82	GroES-like protein OS=Escherichia coli 97.0246 OX=869670 GN=EC970246_3827 PE=3 SV=1 - [I2RR82_ECOLX]	546.538	30.06	127	8	8	28	326	35.1398	6.27783	0.000138205	0.00029551	0.00021311	0.000845301	0.467682	-1.0964
AL530_006395	A0A136SA87	GntR family transcriptional regulator OS=Escherichia coli OX=562 GN=AL530_006395 PE=4 SV=1 - [A0A136SA87_ECOLX]	35.88	14.86	10	4	4	4	249	29.1623	7.15186	0.000149828	0.000320576	0.0061557	0.00447038	0.467372	-1.09736
ydfZ	P64464	Putative selenoprotein YdfZ OS=Escherichia coli O6:H1 (strain CFT073 / ATCC 700928 / UPEC) OX=199310 GN=ydfZ PE=3 SV=1 - [YDFZ_ECOL6]	428	77.61	10	5	5	18	67	7.27176	8.20654	0.00014714	0.000315151	0.000319059	0.00105417	0.466887	-1.09885
AD17_0557	A0A069XT81	Prolyl oligopeptidase family protein OS=Escherichia coli 3-373-03_S4_C2 OX=1444252 GN=AD17_0557 PE=4 SV=1 - [A0A069XT81_ECOLX]	233.137	33.22	112	8	8	14	295	32.5644	6.55127	0.000143693	0.000307889	0.000623548	0.00144042	0.466703	-1.09942
A8C65_23570	A0A210BKP5	Molecular chaperone (Fragment) OS=Escherichia coli OX=562 GN=A8C65_23570 PE=3 SV=1 - [A0A210BKP5_ECOLX]	43.2967	9.83	14	2	2	3	173	19.5485	9.5249	0.000137707	0.000295561	0.0285556	0.0113743	0.465917	-1.10185
gadC	A0A0A1A4V5	Antiporter OS=Escherichia coli OX=562 GN=gadC PE=4 SV=1 - [A0A0A1A4V5_ECOLX]	2104.65	17.81	11	3	13	156	511	55.0105	8.646	0.000137036	0.000294187	0.044651	0.0148131	0.465813	-1.10218
BZL31_16095	A0A243ZYF2	Universal stress protein UspC (Fragment) OS=Escherichia coli OX=562 GN=BZL31_16095 PE=4 SV=1 - [A0A243ZYF2_ECOLX]	215.347	18.32	34	2	2	6	131	14.4653	5.65576	0.000145646	0.000313719	1.58435e-05	0.000195496	0.464257	-1.107
trpB	A0A085NY36	Tryptophan synthase beta chain OS=Escherichia coli OX=562 GN=trpB PE=3 SV=1 - [A0A085NY36_ECOLX]	396.793	33	144	12	12	22	397	42.9847	6.0874	0.000141773	0.000305712	0.00112027	0.00184048	0.463747	-1.10859
BET08_12610	A0A1V2SWR2	Uncharacterized protein (Fragment) OS=Escherichia coli OX=562 GN=BET08_12610 PE=4 SV=1 - [A0A1V2SWR2_ECOLX]	0	7.55	18	1	1	1	106	12.2828	5.66846	0.000141399	0.000304961	1.01996e-05	0.000158083	0.463662	-1.10885
HMPREF9530_01348	D8A4B1	NmrA family protein OS=Escherichia coli (strain MS 21-1) OX=749527 GN=HMPREF9530_01348 PE=4 SV=1 - [D8A4B1_ECOMS]	199.148	43.01	43	1	10	17	286	29.8485	5.99854	0.000143638	0.000309951	0.00365219	0.00341182	0.463421	-1.1096
BMR23_01485	A0A2B7MQV1	Protease SohB OS=Escherichia coli OX=562 GN=BMR23_01485 PE=4 SV=1 - [A0A2B7MQV1_ECOLX]	157.02	24.93	8	2	7	12	349	39.3968	9.33447	0.000134987	0.000291873	0.0243302	0.0102583	0.462486	-1.11252
Q609_ECAC00990G0001	W1X8X6	Protein fimH (Fragment) OS=Escherichia coli DORA_A_5_14_21 OX=1403943 GN=Q609_ECAC00990G0001 PE=4 SV=1 - [W1X8X6_ECOLX]	82.97	19.08	89	3	3	5	173	18.2263	9.05615	0.000140117	0.000303173	0.000263333	0.00095212	0.462167	-1.11351
AZZ83_001250	A0A192ET84	Bifunctional glutathionylspermidine synthetase/amidase OS=Escherichia coli OX=562 GN=AZZ83_001250 PE=4 SV=1 - [A0A192ET84_ECOLX]	339.967	29.56	17	1	13	22	619	70.4333	5.14795	0.000145622	0.000315137	0.00162808	0.00225428	0.462091	-1.11375
ECDEC1C_2289	H4IT18	Uncharacterized protein OS=Escherichia coli DEC1C OX=868135 GN=ECDEC1C_2289 PE=4 SV=1 - [H4IT18_ECOLX]	909.155	61.42	6	2	6	28	127	14.025	4.7417	0.000139951	0.000303108	0.000142106	0.0006789	0.461721	-1.11491
panD	A0A0K4FGY9	Aspartate 1-decarboxylase OS=Escherichia coli OX=562 GN=panD PE=3 SV=1 - [A0A0K4FGY9_ECOLX]	87.0353	16.67	16	2	2	5	126	13.809	6.52197	0.000142159	0.000307987	0.000195045	0.000803496	0.461576	-1.11536
Q609_ECAC00411G0001	W1XAH8	Ethanolamine utilization protein EutM (Fragment) OS=Escherichia coli DORA_A_5_14_21 OX=1403943 GN=Q609_ECAC00411G0001 PE=4 SV=1 - [W1XAH8_ECOLX]	76.88	19.35	12	1	1	1	62	6.18017	5.74463	0.00013687	0.000296774	0.0315214	0.0120916	0.461192	-1.11656
tal	A0A0J2BHL2	Transaldolase OS=Escherichia coli OX=562 GN=tal PE=3 SV=1 - [A0A0J2BHL2_ECOLX]	3336.96	72.47	37	22	23	184	316	35.6645	6.26514	0.000137535	0.000298217	0.0268627	0.0109396	0.461192	-1.11656
alaS	Q0TEI3	Alanine--tRNA ligase OS=Escherichia coli O6:K15:H31 (strain 536 / UPEC) OX=362663 GN=alaS PE=3 SV=1 - [SYA_ECOL5]	4385.34	59.47	34	1	44	207	876	95.9286	5.80811	0.000152717	0.000332349	0.00399828	0.00355073	0.459506	-1.12184
cspE	P0A972	Cold shock-like protein CspE OS=Escherichia coli (strain K12) OX=83333 GN=cspE PE=1 SV=2 - [CSPE_ECOLI]	582.918	68.12	4	4	4	38	69	7.45881	8.54346	0.000137974	0.000301496	0.0149515	0.00766956	0.457633	-1.12774
Q609_ECAC01386G0003	W1X287	DNA polymerase (Fragment) OS=Escherichia coli DORA_A_5_14_21 OX=1403943 GN=Q609_ECAC01386G0003 PE=3 SV=1 - [W1X287_ECOLX]	86.9035	6.36	204	4	4	4	582	66.9912	7.13721	0.000130875	0.00028667	0.00289683	0.00305212	0.456537	-1.1312
CSC15_2587	A0A2T7Y5W0	Lysine--tRNA ligase OS=Escherichia coli OX=562 GN=CSC15_2587 PE=4 SV=1 - [A0A2T7Y5W0_ECOLX]	3069.7	62.77	7	1	30	187	505	57.8342	5.2749	0.00013737	0.0003014	0.0220099	0.00967995	0.455774	-1.13361
C6986_37985	A0A2T1M9P8	Uncharacterized protein (Fragment) OS=Escherichia coli OX=562 GN=C6986_37985 PE=4 SV=1 - [A0A2T1M9P8_ECOLX]	63.3278	42.86	29	5	5	7	119	12.2028	10.3452	0.000149429	0.000327945	0.00189314	0.00243505	0.455653	-1.13399
APU18_03880	A0A0V9I0B0	Dihydropyrimidine dehydrogenase OS=Escherichia coli OX=562 GN=APU18_03880 PE=4 SV=1 - [A0A0V9I0B0_ECOLX]	1122.56	42.96	18	1	15	39	412	44.2675	5.40186	0.000152717	0.00033577	0.0112993	0.00648295	0.454827	-1.13661
AC93_2322	A0A029IQ47	Nucleoside permease OS=Escherichia coli 2-005-03_S4_C2 OX=1444228 GN=AC93_2322 PE=3 SV=1 - [A0A029IQ47_ECOLX]	90.473	11.55	76	3	3	3	407	42.4648	8.35303	0.000137433	0.000302214	0.00994739	0.00598611	0.454755	-1.13684
cat	P62577	Chloramphenicol acetyltransferase OS=Escherichia coli OX=562 GN=cat PE=1 SV=1 - [CAT_ECOLX]	408.057	30.59	12	5	5	29	219	25.6463	6.37939	0.000137923	0.000303568	0.0388257	0.0136875	0.45434	-1.13815
HMPREF1604_03174	V0V8K1	Cadmium-exporting ATPase OS=Escherichia coli 908519 OX=1268991 GN=HMPREF1604_03174 PE=3 SV=1 - [V0V8K1_ECOLX]	447.12	21.45	131	1	11	21	676	70.8471	5.63037	0.000142158	0.000312931	0.00419599	0.0036241	0.454278	-1.13835
tsr	A0A0H3MXG4	Methyl-accepting chemotaxis protein I, serine sensor receptor OS=Escherichia coli O7:K1 (strain IAI39 / ExPEC) OX=585057 GN=tsr PE=4 SV=1 - [A0A0H3MXG4_ECO7I]	85.5337	24.19	134	12	12	12	554	59.8075	4.97021	0.000148441	0.000326874	0.00013484	0.00066145	0.454122	-1.13885
C1I57_33455	A0A2R9VZC1	Anaerobic glycerol-3-phosphate dehydrogenase subunit B (Fragment) OS=Escherichia coli OX=562 GN=C1I57_33455 PE=4 SV=1 - [A0A2R9VZC1_ECOLX]	173.71	30.65	102	5	5	11	199	22.2217	5.92236	0.00013795	0.000304492	0.00556862	0.00421746	0.453049	-1.14226
rfaH	Q0TAL4	Transcription antitermination protein RfaH OS=Escherichia coli O6:K15:H31 (strain 536 / UPEC) OX=362663 GN=rfaH PE=1 SV=1 - [RFAH_ECOL5]	58.7854	12.35	3	2	2	3	162	18.3446	8.44092	0.000135378	0.000299332	0.00911921	0.00566948	0.452267	-1.14475
glpK	V0AEI1	Glycerol kinase OS=Escherichia coli 909945-2 OX=1269007 GN=glpK PE=3 SV=1 - [V0AEI1_ECOLX]	2773.25	61.3	19	14	25	122	509	56.9396	5.59229	0.000137355	0.000304474	0.00133714	0.00202112	0.451122	-1.14841
Q609_ECAC02875G0001	W1W529	Nicotinate phosphoribosyltransferase (Fragment) OS=Escherichia coli DORA_A_5_14_21 OX=1403943 GN=Q609_ECAC02875G0001 PE=3 SV=1 - [W1W529_ECOLX]	47.37	2.66	58	1	1	1	301	34.9618	7.75244	0.000126078	0.000280202	0.00201107	0.00250747	0.449953	-1.15215
adhC	A0A0K4IUJ9	S-(hydroxymethyl)glutathione dehydrogenase OS=Escherichia coli OX=562 GN=adhC PE=3 SV=1 - [A0A0K4IUJ9_ECOLX]	192.544	39.3	11	2	11	26	369	39.3068	6.40479	0.000121939	0.000271781	0.00398542	0.00354581	0.448667	-1.15628
dcuA	A0A125WVE1	Anaerobic C4-dicarboxylate transporter OS=Escherichia coli 1-110-08_S3_C1 OX=1444132 GN=dcuA PE=3 SV=1 - [A0A125WVE1_ECOLX]	184.074	7.71	16	4	4	10	402	42.715	7.75244	0.000136415	0.000304752	0.00951924	0.00581848	0.447626	-1.15964
BX06_02440	A0A028APV0	DEAD/DEAH box helicase OS=Escherichia coli O69:H11 str. 08-4661 OX=1446753 GN=BX06_02440 PE=4 SV=1 - [A0A028APV0_ECOLX]	122.175	11.23	35	8	8	10	810	91.9457	5.09717	0.000136768	0.000305692	0.000697288	0.00150413	0.447406	-1.16034
HMPREF9530_03881	D8ABE5	Pyridoxal kinase OS=Escherichia coli (strain MS 21-1) OX=749527 GN=HMPREF9530_03881 PE=4 SV=1 - [D8ABE5_ECOMS]	265.419	19.15	44	3	3	8	188	20.6007	5.92236	0.000138769	0.000310786	0.0013191	0.00200525	0.44651	-1.16323
AZZ83_001633	A0A192EV49	Cell filamentation protein Fic OS=Escherichia coli OX=562 GN=AZZ83_001633 PE=4 SV=1 - [A0A192EV49_ECOLX]	272.58	50.5	9	3	8	19	200	22.9295	5.14795	0.000133438	0.000299595	6.06284e-07	5.80631e-05	0.445395	-1.16684
EC1303_c38540	A0A0E1M3E2	Uncharacterized protein OS=Escherichia coli 1303 OX=745156 GN=EC1303_c38540 PE=4 SV=1 - [A0A0E1M3E2_ECOLX]	41.2	12.56	47	3	3	3	207	24.0027	9.65674	0.000133419	0.000299693	0.000623186	0.00144009	0.445185	-1.16752
gntK	A0A1V2T8V8	Gluconokinase (Fragment) OS=Escherichia coli OX=562 GN=gntK PE=3 SV=1 - [A0A1V2T8V8_ECOLX]	112.666	40.16	30	4	4	7	122	13.637	8.83643	0.000135574	0.000305461	0.00229883	0.00269639	0.443832	-1.17191
trpA	Q0TIB0	Tryptophan synthase alpha chain OS=Escherichia coli O6:K15:H31 (strain 536 / UPEC) OX=362663 GN=trpA PE=3 SV=1 - [TRPA_ECOL5]	376.461	60.07	126	1	12	25	268	28.635	5.33838	0.000161702	0.000364682	0.0107569	0.00628926	0.443405	-1.1733
gadA	A5YKF6	Glutamate decarboxylase OS=Escherichia coli OX=562 GN=gadA PE=3 SV=1 - [A5YKF6_ECOLX]	20524.2	77.9	110	1	29	829	466	52.6932	5.41455	0.000119147	0.000268813	0.00640969	0.00457746	0.443235	-1.17386
argS	A0A2D0P661	Arginine--tRNA ligase OS=Escherichia coli O127:H6 OX=168807 GN=argS PE=3 SV=1 - [A0A2D0P661_ECOLX]	1620.51	48.49	6	5	23	68	563	63.018	5.49072	0.00013086	0.000295471	0.00073988	0.00153723	0.442886	-1.17499
ACN81_06100	A0A1Q6B056	VOC family protein OS=Escherichia coli OX=562 GN=ACN81_06100 PE=4 SV=1 - [A0A1Q6B056_ECOLX]	994.501	78.91	23	1	9	39	147	16.1268	5.19873	0.000129956	0.000294433	0.00254915	0.00285373	0.441379	-1.17991
aroD	A0A073HGE8	3-dehydroquinate dehydratase OS=Escherichia coli 5-366-08_S1_C3 OX=1444102 GN=aroD PE=3 SV=1 - [A0A073HGE8_ECOLX]	361.007	42.46	51	1	10	20	252	27.4352	5.36377	0.000135235	0.000306577	3.81404e-05	0.000305312	0.441113	-1.18078
mtlD	S1P6F4	Mannitol-1-phosphate 5-dehydrogenase OS=Escherichia coli KTE182 OX=1181728 GN=mtlD PE=3 SV=1 - [S1P6F4_ECOLX]	1500.03	71.2	74	2	19	64	382	41.1305	5.40186	0.000131134	0.000298799	0.000381577	0.00114957	0.43887	-1.18813
BB545_08520	A0A2A3WUN9	Glutathione transferase GstA OS=Escherichia coli OX=562 GN=BB545_08520 PE=4 SV=1 - [A0A2A3WUN9_ECOLX]	1214.85	73.63	6	4	13	67	201	22.8529	6.55127	0.00013078	0.000298192	0.00993547	0.00598151	0.438575	-1.1891
C6985_02165	A0A2T1LPA9	D-alanine--D-alanine ligase OS=Escherichia coli OX=562 GN=C6985_02165 PE=4 SV=1 - [A0A2T1LPA9_ECOLX]	375.134	27.2	7	1	8	26	364	39.1621	5.17334	0.000125569	0.00028853	0.00127051	0.00196233	0.435203	-1.20024
ispH	A0A0H3ED19	4-hydroxy-3-methylbut-2-enyl diphosphate reductase OS=Escherichia coli O83:H1 (strain NRG 857C / AIEC) OX=685038 GN=ispH PE=3 SV=1 - [A0A0H3ED19_ECO8N]	385.632	30.7	19	1	9	22	316	34.7139	5.22412	0.000131494	0.000302969	0.0459958	0.0150699	0.434019	-1.20417
G925_04386	A0A0E2KXX1	Lysine decarboxylase, inducible OS=Escherichia coli (strain UMEA 3162-1) OX=1281200 GN=G925_04386 PE=4 SV=1 - [A0A0E2KXX1_ECOU3]	1413.51	47.69	46	25	26	86	715	81.1937	6.34131	0.000132776	0.000306961	0.00471038	0.00384313	0.43255	-1.20906
ydiH	P64477	Uncharacterized protein YdiH OS=Escherichia coli O157:H7 OX=83334 GN=ydiH PE=4 SV=2 - [YDIH_ECO57]	83.1022	56.45	18	3	3	4	62	7.26183	5.2876	0.000139816	0.0003234	0.000733666	0.00153255	0.432331	-1.20979
WM48_01685	A0A192EKM3	Uncharacterized protein OS=Escherichia coli OX=562 GN=WM48_01685 PE=4 SV=1 - [A0A192EKM3_ECOLX]	1477.73	35.96	26	3	24	54	1040	106.965	6.1001	0.000116939	0.000270694	0.00304438	0.00312944	0.431996	-1.21091
BE963_06085	A0A0X5DWZ7	Inorganic triphosphatase OS=Escherichia coli OX=562 GN=BE963_06085 PE=4 SV=1 - [A0A0X5DWZ7_ECOLX]	308.827	31.64	41	1	13	25	433	48.5179	6.04932	0.000130217	0.000301461	0.000443701	0.00123924	0.431952	-1.21106
AZZ83_004512	A0A192ERT7	Polyketide synthase OS=Escherichia coli OX=562 GN=AZZ83_004512 PE=4 SV=1 - [A0A192ERT7_ECOLX]	189.858	17.43	3	13	13	15	1010	108.391	5.24951	0.000136969	0.000317315	2.5361e-05	0.000241539	0.431649	-1.21207
C5P43_26705	A0A2S7HM87	Transferase (Fragment) OS=Escherichia coli OX=562 GN=C5P43_26705 PE=4 SV=1 - [A0A2S7HM87_ECOLX]	50.48	15.63	77	1	1	1	64	7.40768	5.0083	0.000125261	0.000290963	0.0395222	0.0138264	0.430506	-1.21589
G925_01558	A0A0E2L5Y8	Spermidine N(1)-acetyltransferase OS=Escherichia coli (strain UMEA 3162-1) OX=1281200 GN=G925_01558 PE=4 SV=1 - [A0A0E2L5Y8_ECOU3]	486.101	51.61	18	9	9	30	186	21.8871	6.68311	0.000128024	0.000298537	0.000581234	0.00139961	0.428838	-1.2215
glgC	A0A1D3KFZ8	Glucose-1-phosphate adenylyltransferase OS=Escherichia coli OX=562 GN=glgC PE=3 SV=1 - [A0A1D3KFZ8_ECOLX]	463.722	23.43	1	1	8	29	431	48.4895	6.34131	0.00012795	0.000299935	0.00407314	0.00357899	0.426591	-1.22907
uxuA	A0A0E1LJQ8	Mannonate dehydratase OS=Escherichia coli OX=562 GN=uxuA PE=3 SV=1 - [A0A0E1LJQ8_ECOLX]	494.05	50.76	41	1	17	43	394	44.7835	5.61768	0.000129309	0.000303604	0.000386516	0.00115639	0.425913	-1.23137
tnaA	A0A066TAZ7	Tryptophanase OS=Escherichia coli OX=562 GN=tnaA PE=3 SV=1 - [A0A066TAZ7_ECOLX]	4160.4	68.15	10	1	27	206	471	52.7386	6.39209	0.000133256	0.0003133	0.00375899	0.0034562	0.425331	-1.23334
AD23_4315	A0A029HEJ6	KDPG and KHG aldolase family protein OS=Escherichia coli 2-005-03_S4_C3 OX=1444258 GN=AD23_4315 PE=4 SV=1 - [A0A029HEJ6_ECOLX]	0	6.4	15	1	1	1	203	21.5802	6.771	0.000132393	0.000311463	0.00986962	0.00595605	0.425069	-1.23423
HMPREF3040_01099	A0A135PTK8	Hydrogenase accessory protein HypB OS=Escherichia coli OX=562 GN=HMPREF3040_01099 PE=4 SV=1 - [A0A135PTK8_ECOLX]	110.24	25.3	34	4	4	4	253	27.6591	5.49072	0.000131978	0.00031063	9.50472e-05	0.000546441	0.424871	-1.2349
gsiB	A0A029IYL6	Glutathione-binding protein gsiB OS=Escherichia coli 2-005-03_S4_C2 OX=1444228 GN=gsiB PE=4 SV=1 - [A0A029IYL6_ECOLX]	223.814	25.98	14	1	10	17	512	56.4358	8.51416	0.000127342	0.000300104	0.000676857	0.00148734	0.424326	-1.23676
ptsI	A0A0K3SBT1	Phosphoenolpyruvate-protein phosphotransferase OS=Escherichia coli OX=562 GN=ptsI PE=3 SV=1 - [A0A0K3SBT1_ECOLX]	7275.75	74.78	180	1	35	284	575	63.5239	4.86865	0.000122785	0.000290901	0.00745897	0.00499384	0.422085	-1.24439
C4M78_22235	A0A2S5U7C1	Oxygen-insensitive NAD(P)H nitroreductase OS=Escherichia coli OX=562 GN=C4M78_22235 PE=4 SV=1 - [A0A2S5U7C1_ECOLX]	698.07	57.14	21	1	12	40	217	23.9202	6.01123	0.00013149	0.000311584	0.00106134	0.00179489	0.422005	-1.24467
grcA	A0A1Q4PZE9	Autonomous glycyl radical cofactor OS=Escherichia coli OX=562 GN=grcA PE=3 SV=1 - [A0A1Q4PZE9_ECOLX]	533.753	69.29	5	2	9	47	127	14.3054	5.17334	0.000134026	0.000317746	0.00130407	0.00199188	0.421801	-1.24536
APU18_21615	A0A0V9RFI4	Dimethyl sulfoxide reductase OS=Escherichia coli OX=562 GN=APU18_21615 PE=3 SV=1 - [A0A0V9RFI4_ECOLX]	773.49	32.68	218	14	23	44	814	90.4072	6.82959	0.000127385	0.000302371	0.0117625	0.0066427	0.421289	-1.24712
proS	A0A0K3UER4	Proline--tRNA ligase OS=Escherichia coli OX=562 GN=proS PE=3 SV=1 - [A0A0K3UER4_ECOLX]	2728.96	62.06	21	1	27	121	572	63.5677	5.18604	0.000125797	0.000299821	0.00161374	0.00224371	0.419575	-1.253
G925_04273	A0A0E2KXQ4	Diacylglycerol kinase OS=Escherichia coli (strain UMEA 3162-1) OX=1281200 GN=G925_04273 PE=3 SV=1 - [A0A0E2KXQ4_ECOU3]	0	21.31	15	3	3	4	122	13.2481	6.52197	0.000129322	0.000308386	0.00107789	0.00180587	0.419353	-1.25376
G925_00390	A0A0E2LNN5	Riboflavin biosynthesis protein RibD OS=Escherichia coli (strain UMEA 3162-1) OX=1281200 GN=G925_00390 PE=3 SV=1 - [A0A0E2LNN5_ECOU3]	489.438	37.33	4	2	11	29	367	40.3598	7.56201	0.000130227	0.000310666	0.0364243	0.013192	0.419186	-1.25434
CR539_18230	A0A2I6F2Q4	Uncharacterized protein OS=Escherichia coli OX=562 GN=CR539_18230 PE=4 SV=1 - [A0A2I6F2Q4_ECOLX]	649.357	46.79	4	1	4	21	109	11.839	9.05615	0.000117033	0.000279486	0.0460637	0.0150827	0.418742	-1.25587
A13A_04238	S1P3X9	Thiol:disulfide interchange protein OS=Escherichia coli KTE182 OX=1181728 GN=A13A_04238 PE=3 SV=1 - [S1P3X9_ECOLX]	1575.33	58.17	9	2	10	64	208	23.1347	6.34131	0.000127541	0.000305596	0.0194175	0.00898742	0.417352	-1.26066
C7U73_04790	A0A2T3RFV1	DEAD/DEAH box family ATP-dependent RNA helicase OS=Escherichia coli OX=562 GN=C7U73_04790 PE=4 SV=1 - [A0A2T3RFV1_ECOLX]	0	2.86	1	2	2	2	629	70.5467	8.71924	0.000125356	0.000301863	0.00358084	0.00338137	0.415274	-1.26786
BTQ06_26035	A0A2A2BS35	Peptide transporter (Fragment) OS=Escherichia coli OX=562 GN=BTQ06_26035 PE=4 SV=1 - [A0A2A2BS35_ECOLX]	77.6503	12.13	52	4	4	5	371	40.7676	6.41748	0.000127373	0.000306907	0.000530613	0.001346	0.415022	-1.26874
AB67_2453	A0A073HDS9	Cobalamin synthesis cobW C-terminal domain protein OS=Escherichia coli 5-366-08_S1_C3 OX=1444102 GN=AB67_2453 PE=4 SV=1 - [A0A073HDS9_ECOLX]	156.227	17.68	59	1	5	8	328	36.0668	6.53662	0.00012635	0.000305518	0.0389172	0.0137059	0.413559	-1.27384
EC54115_17077	I4SIS8	Outer membrane protein W OS=Escherichia coli 541-15 OX=752785 GN=EC54115_17077 PE=4 SV=1 - [I4SIS8_ECOLX]	4221.14	51.42	20	1	6	151	212	22.9133	6.52197	0.000138803	0.00033593	0.00600873	0.00440903	0.41319	-1.27512
C4Z16_01940	A0A061KRF9	Integrase OS=Escherichia coli OX=562 GN=C4Z16_01940 PE=4 SV=1 - [A0A061KRF9_ECOLX]	30.92	4.26	13	1	1	1	258	28.7452	9.20264	0.000119065	0.000288685	0.000659443	0.00147252	0.412439	-1.27775
APU18_08095	A0A0G9FM98	Thioesterase OS=Escherichia coli OX=562 GN=APU18_08095 PE=4 SV=1 - [A0A0G9FM98_ECOLX]	63.2763	18.52	4	3	3	4	189	21.6178	5.66846	0.000127712	0.000309807	0.00104658	0.00178493	0.412233	-1.27847
BH694_11740	A0A061KYN2	Hydrogenase expression/formation protein OS=Escherichia coli OX=562 GN=BH694_11740 PE=4 SV=1 - [A0A061KYN2_ECOLX]	29.93	3.16	9	1	1	1	285	31.3218	4.729	0.000129847	0.000316333	5.45561e-05	0.000385537	0.410477	-1.28463
APU18_17440	A0A0G9FLZ0	Disulfide-bond oxidoreductase YghU OS=Escherichia coli OX=562 GN=APU18_17440 PE=4 SV=1 - [A0A0G9FLZ0_ECOLX]	853.51	47.92	14	1	13	48	288	32.2994	6.69775	0.00012183	0.000297064	0.00207167	0.00254298	0.410114	-1.2859
hisC	A0A210NRS9	Histidinol-phosphate aminotransferase OS=Escherichia coli OX=562 GN=hisC PE=3 SV=1 - [A0A210NRS9_ECOLX]	220.382	30.62	124	2	10	16	356	39.3122	5.021	0.000122303	0.00029928	7.9983e-05	0.00049411	0.408655	-1.29104
clbG	A0A2T3SSL4	Colibactin biosynthesis acyltransferase ClbG OS=Escherichia coli OX=562 GN=clbG PE=4 SV=1 - [A0A2T3SSL4_ECOLX]	37.28	2.37	2	1	1	1	422	46.6346	6.45557	0.000133996	0.00032872	0.0122295	0.00679874	0.40763	-1.29467
C6986_35175	A0A2T1ML35	Exodeoxyribonuclease V subunit beta (Fragment) OS=Escherichia coli OX=562 GN=C6986_35175 PE=4 SV=1 - [A0A2T1ML35_ECOLX]	31.79	3.7	147	1	1	1	216	24.6513	8.01611	0.000124886	0.000306914	0.00656101	0.00464019	0.406908	-1.29723
folE	A0A244BNX2	GTP cyclohydrolase 1 OS=Escherichia coli OX=562 GN=folE PE=3 SV=1 - [A0A244BNX2_ECOLX]	84.52	20.72	13	4	4	9	222	24.843	7.32764	0.00012743	0.000313305	0.00394818	0.00353147	0.406729	-1.29786
NRG857_12310	A0A0H3EMY9	Putative NUDIX hydrolase OS=Escherichia coli O83:H1 (strain NRG 857C / AIEC) OX=685038 GN=NRG857_12310 PE=4 SV=1 - [A0A0H3EMY9_ECO8N]	48.37	4.19	2	1	1	1	191	21.689	4.94482	0.000122747	0.000302042	0.0365162	0.0132115	0.406389	-1.29907
metE	A0A029HEI3	5-methyltetrahydropteroyltriglutamate--homocysteine methyltransferase OS=Escherichia coli 2-005-03_S4_C3 OX=1444258 GN=metE PE=3 SV=1 - [A0A029HEI3_ECOLX]	65.2694	3.98	104	3	3	4	753	84.6578	5.92236	0.000131139	0.000322813	0.00384413	0.00349059	0.406237	-1.29961
yciE	Q6I8X4	Ferritin-like domain-containing protein OS=Escherichia coli OX=562 GN=yciE PE=4 SV=1 - [Q6I8X4_ECOLX]	685.276	61.31	52	1	8	34	168	18.9815	5.26221	0.000114656	0.000284015	0.0203674	0.00924862	0.403698	-1.30865
cmtB	A0A026UPP2	PTS system mannitol-specific transporter subunit IIA OS=Escherichia coli O174:H8 str. 04-3038 OX=1446704 GN=cmtB PE=4 SV=1 - [A0A026UPP2_ECOLX]	130.61	23.81	14	3	3	5	147	16.1455	4.99561	0.000124897	0.000310067	2.23188e-05	0.000229286	0.402807	-1.31184
Q609_ECAC01614G0006	W1WWK5	Conserved integral membrane protein (Fragment) OS=Escherichia coli DORA_A_5_14_21 OX=1403943 GN=Q609_ECAC01614G0006 PE=4 SV=1 - [W1WWK5_ECOLX]	34.72	1.42	35	1	1	1	565	61.9467	9.23193	0.000125405	0.00031218	0.000559146	0.0013769	0.401708	-1.31578
napH	A0A0K3RXM7	Ferredoxin-type protein NapH OS=Escherichia coli OX=562 GN=napH PE=4 SV=1 - [A0A0K3RXM7_ECOLX]	0	5.23	1	1	1	1	287	31.8625	8.55811	0.000125079	0.000314089	0.000114125	0.000606138	0.398227	-1.32834
gadB	A0A0H2Z472	Glutamate decarboxylase OS=Escherichia coli O1:K1 / APEC OX=405955 GN=gadB PE=3 SV=1 - [A0A0H2Z472_ECOK1]	27717	74.79	87	1	32	1055	476	53.7761	5.49072	0.000117627	0.000296423	0.00432202	0.00367526	0.396821	-1.33344
Q458_24165	V8FCB1	Uncharacterized protein (Fragment) OS=Escherichia coli ATCC BAA-2209 OX=1405293 GN=Q458_24165 PE=4 SV=1 - [V8FCB1_ECOLX]	51.17	21.28	37	2	2	3	94	9.84439	9.12939	0.000121312	0.000307654	0.000124842	0.000635849	0.394313	-1.34259
hyaC	A0A024KT01	Probable Ni/Fe-hydrogenase 1 b-type cytochrome subunit OS=Escherichia coli D6-113.11 OX=1400022 GN=hyaC PE=4 SV=1 - [A0A024KT01_ECOLX]	33.27	10.21	32	2	2	2	235	27.4498	9.34912	0.000121707	0.000310267	0.00064511	0.00145997	0.392265	-1.3501
A8C65_27200	A0A210NRE5	TetR family transcriptional regulator OS=Escherichia coli OX=562 GN=A8C65_27200 PE=4 SV=1 - [A0A210NRE5_ECOLX]	62.0696	17.22	4	4	4	5	209	23.1941	9.62744	0.000119281	0.000305654	1.78797e-05	0.0002075	0.390248	-1.35754
NRG857_21970	A0A0H3EQT0	Type I restriction enzyme EcoEI specificity protein OS=Escherichia coli O83:H1 (strain NRG 857C / AIEC) OX=685038 GN=NRG857_21970 PE=4 SV=1 - [A0A0H3EQT0_ECO8N]	57.4113	10.39	37	4	4	5	568	63.1477	5.42725	0.000116073	0.000298274	9.50778e-05	0.00054654	0.389149	-1.36161
BXT93_25390	A0A1V2G038	Methyl-accepting chemotaxis protein II (Fragment) OS=Escherichia coli OX=562 GN=BXT93_25390 PE=4 SV=1 - [A0A1V2G038_ECOLX]	38.45	5.51	121	2	2	2	363	40.0004	6.81494	0.000119994	0.000308966	0.00559808	0.00423066	0.388373	-1.36448
C1I57_32055	A0A2R9W098	Uncharacterized protein (Fragment) OS=Escherichia coli OX=562 GN=C1I57_32055 PE=4 SV=1 - [A0A2R9W098_ECOLX]	78.52	13.81	55	3	3	3	210	23.6778	9.99365	0.000112439	0.000289913	0.000620111	0.00143723	0.387838	-1.36647
yibQ	A0A2D0NWI8	Polysaccharide deacetylase OS=Escherichia coli O127:H6 OX=168807 GN=yibQ PE=4 SV=1 - [A0A2D0NWI8_ECOLX]	42.41	2.92	56	1	1	1	274	30.4368	9.5835	0.000116989	0.000302332	0.04894	0.0156116	0.386953	-1.36977
G925_04380	A0A0E2LCK9	Uncharacterized protein OS=Escherichia coli (strain UMEA 3162-1) OX=1281200 GN=G925_04380 PE=4 SV=1 - [A0A0E2LCK9_ECOU3]	93.9103	46.05	26	2	3	4	76	8.55826	8.48486	0.000115297	0.000299187	0.00733103	0.00494146	0.385367	-1.3757
AZZ83_001228	A0A243V332	Accessory colonization factor AcfD (Fragment) OS=Escherichia coli OX=562 GN=AZZ83_001228 PE=4 SV=1 - [A0A243V332_ECOLX]	204.077	10.16	76	12	12	13	1516	166.79	5.04639	0.000118176	0.000307103	0.00040014	0.00117718	0.38481	-1.37778
rpsF	P02358	30S ribosomal protein S6 OS=Escherichia coli (strain K12) OX=83333 GN=rpsF PE=1 SV=1 - [RS6_ECOLI]	1082.86	77.78	5	1	7	47	135	15.6936	4.99561	0.000122176	0.000317904	0.0446066	0.0148047	0.384318	-1.37963
elbB	A0A029HJ73	Glyoxalase OS=Escherichia coli 2-005-03_S4_C3 OX=1444258 GN=elbB PE=3 SV=1 - [A0A029HJ73_ECOLX]	507.858	40.55	55	1	6	19	217	22.9759	4.76709	0.000118109	0.000308477	0.0132559	0.0071355	0.382879	-1.38504
Q609_ECAC00312G0001	W1XDJ4	DNA topoisomerase 3 (Fragment) OS=Escherichia coli DORA_A_5_14_21 OX=1403943 GN=Q609_ECAC00312G0001 PE=3 SV=1 - [W1XDJ4_ECOLX]	47.18	4.21	116	3	3	3	617	69.6112	7.6792	0.00012357	0.000323342	6.18932e-05	0.000419946	0.382166	-1.38773
tolC	A0A0H2VDL3	Outer membrane protein tolC OS=Escherichia coli O6:H1 (strain CFT073 / ATCC 700928 / UPEC) OX=199310 GN=tolC PE=4 SV=1 - [A0A0H2VDL3_ECOL6]	1821.55	50.99	27	2	18	96	506	55.0178	6.0874	0.00011261	0.000295544	0.00805484	0.00524698	0.381026	-1.39204
AZZ83_004308	A0A192EQD0	Protein YdgA OS=Escherichia coli OX=562 GN=AZZ83_004308 PE=4 SV=1 - [A0A192EQD0_ECOLX]	4299.01	75.7	14	2	26	180	502	54.5729	5.16064	0.000115857	0.00030488	0.00308412	0.00314962	0.380009	-1.3959
trmB	Q0TDP1	tRNA (guanine-N(7)-)-methyltransferase OS=Escherichia coli O6:K15:H31 (strain 536 / UPEC) OX=362663 GN=trmB PE=3 SV=1 - [TRMB_ECOL5]	69.3525	16.32	1	1	3	13	239	27.3177	6.91748	0.000114597	0.000301659	0.000156532	0.000710982	0.379891	-1.39634
Q609_ECAC01594G0001	W1X278	Outer membrane receptor protein FhuA (Fragment) OS=Escherichia coli DORA_A_5_14_21 OX=1403943 GN=Q609_ECAC01594G0001 PE=3 SV=1 - [W1X278_ECOLX]	139.882	21.18	82	12	14	21	727	79.959	5.22412	0.000114061	0.000300983	0.0302246	0.0117846	0.378961	-1.39988
A8M42_23985	Q8G9V6	BMC domain-containing protein OS=Escherichia coli OX=562 GN=A8M42_23985 PE=4 SV=1 - [Q8G9V6_ECOLX]	0	12.77	1	1	1	1	94	9.64798	5.08447	0.000117337	0.000310032	0.000911674	0.0016854	0.378467	-1.40176
UC41_25355	A0A0D8W6N8	Uncharacterized protein (Fragment) OS=Escherichia coli OX=562 GN=UC41_25355 PE=4 SV=1 - [A0A0D8W6N8_ECOLX]	56.68	15	68	2	2	3	140	15.1049	4.97021	0.000109493	0.000291175	0.00158697	0.00222374	0.376037	-1.41105
BIZ41_13495	A0A271QZ49	Arsenate reductase OS=Escherichia coli OX=562 GN=BIZ41_13495 PE=3 SV=1 - [A0A271QZ49_ECOLX]	477.751	77.31	14	1	7	24	119	13.4071	7.18115	0.000117755	0.000314929	0.00123624	0.00193505	0.373909	-1.41924
sthA	Q0TA96	Soluble pyridine nucleotide transhydrogenase OS=Escherichia coli O6:K15:H31 (strain 536 / UPEC) OX=362663 GN=sthA PE=3 SV=1 - [STHA_ECOL5]	1085.75	51.07	6	1	16	53	466	51.5578	6.56592	0.0001093	0.000293217	0.00159209	0.00222758	0.372762	-1.42368
ECW26_02610	I0VYM5	Carbon starvation protein A OS=Escherichia coli W26 OX=1090926 GN=ECW26_02610 PE=4 SV=1 - [I0VYM5_ECOLX]	96.7496	10.34	70	6	6	6	677	72.9087	8.39697	0.000119126	0.000320194	0.00160248	0.00223535	0.372043	-1.42646
Q609_ECAC02202G0001	W1WJ71	Glycerol uptake facilitator protein (Fragment) OS=Escherichia coli DORA_A_5_14_21 OX=1403943 GN=Q609_ECAC02202G0001 PE=4 SV=1 - [W1WJ71_ECOLX]	26.97	23.68	18	1	1	1	38	4.17218	7.12256	0.000129513	0.000348161	0.0179631	0.0085674	0.371992	-1.42666
ECW26_31980	I0VQ71	Uncharacterized protein OS=Escherichia coli W26 OX=1090926 GN=ECW26_31980 PE=4 SV=1 - [I0VQ71_ECOLX]	0	33.33	12	1	1	1	39	4.85836	9.24658	0.000105919	0.000286946	0.00434248	0.00368429	0.369127	-1.43781
msrA	Q0T9G6	Peptide methionine sulfoxide reductase MsrA OS=Escherichia coli O6:K15:H31 (strain 536 / UPEC) OX=362663 GN=msrA PE=3 SV=1 - [MSRA_ECOL5]	422.196	41.51	6	1	7	22	212	23.3491	5.18604	0.000103879	0.000283091	0.0449488	0.0148701	0.366947	-1.44636
BWP17_08900	A0A1V3CKT2	Formate dehydrogenase subunit alpha OS=Escherichia coli OX=562 GN=BWP17_08900 PE=3 SV=1 - [A0A1V3CKT2_ECOLX]	0	1.58	1	1	1	1	568	63.3344	5.51611	0.000118494	0.000324578	0.00636207	0.00455747	0.36507	-1.45375
glpC	A0A0K4JIT9	Anaerobic glycerol-3-phosphate dehydrogenase subunit C OS=Escherichia coli OX=562 GN=glpC PE=4 SV=1 - [A0A0K4JIT9_ECOLX]	343.095	29.29	60	12	12	19	396	44.0796	8.57275	0.000112719	0.000309193	3.48894e-06	0.000108266	0.364559	-1.45577
NRG857_15805	A0A0H3EM32	Octaprenyl diphosphate synthase OS=Escherichia coli O83:H1 (strain NRG 857C / AIEC) OX=685038 GN=NRG857_15805 PE=3 SV=1 - [A0A0H3EM32_ECO8N]	451.334	26.63	31	1	7	20	323	35.2087	4.80518	0.000108816	0.000300264	8.09041e-05	0.000497533	0.362403	-1.46434
BXT93_24000	A0A1V2G584	Cob(I)yrinic acid a,c-diamide adenosyltransferase OS=Escherichia coli OX=562 GN=BXT93_24000 PE=3 SV=1 - [A0A1V2G584_ECOLX]	84.74	22.83	15	1	4	10	184	20.4354	6.29053	0.000107052	0.000295526	0.00240436	0.00276452	0.362241	-1.46498
yceH	F4SVV5	UPF0502 protein YceH OS=Escherichia coli M605 OX=656417 GN=yceH PE=3 SV=1 - [F4SVV5_ECOLX]	275.887	51.63	16	1	10	24	215	24.1212	5.13525	0.000109769	0.000305072	0.00341197	0.0033066	0.359813	-1.47468
grcA	B1LP92	Autonomous glycyl radical cofactor OS=Escherichia coli (strain SMS-3-5 / SECEC) OX=439855 GN=grcA PE=3 SV=1 - [GRCA_ECOSM]	1758.69	69.29	11	2	9	85	127	14.2594	5.17334	0.000110723	0.000307873	0.00377175	0.00346141	0.359638	-1.47538
APU18_08065	A0A0V9S443	Non-ribosomal peptide synthetase OS=Escherichia coli OX=562 GN=APU18_08065 PE=4 SV=1 - [A0A0V9S443_ECOLX]	329.158	11.1	11	13	20	28	2154	237.707	5.75732	0.000112076	0.000313417	4.38299e-05	0.000329757	0.357595	-1.4836
AC93_2484	A0A029IRA8	Uncharacterized protein OS=Escherichia coli 2-005-03_S4_C2 OX=1444228 GN=AC93_2484 PE=4 SV=1 - [A0A029IRA8_ECOLX]	113.328	41.12	7	2	9	18	214	24.2564	5.43994	0.000111116	0.000313071	0.000372874	0.00113731	0.354921	-1.49443
HMPREF3040_00878	A0A135PVY0	Uncharacterized protein OS=Escherichia coli OX=562 GN=HMPREF3040_00878 PE=4 SV=1 - [A0A135PVY0_ECOLX]	433.144	65	12	2	4	19	80	8.8532	4.36084	0.000111073	0.000313224	0.000984027	0.00174077	0.354613	-1.49568
metG	A0A0K4KQY6	Methionine--tRNA ligase OS=Escherichia coli OX=562 GN=metG PE=3 SV=1 - [A0A0K4KQY6_ECOLX]	2163.93	51.85	25	2	26	93	677	76.2511	5.70654	0.000107181	0.000303688	0.00422735	0.00363537	0.35293	-1.50254
mdh	Q0TCN0	Malate dehydrogenase OS=Escherichia coli O6:K15:H31 (strain 536 / UPEC) OX=362663 GN=mdh PE=3 SV=1 - [MDH_ECOL5]	7359.3	63.78	87	1	16	214	312	32.3312	5.77002	9.82267e-05	0.000279564	0.000860416	0.00164306	0.351356	-1.50899
Q609_ECAC00553G0002	W1X9J4	Uncharacterized protein (Fragment) OS=Escherichia coli DORA_A_5_14_21 OX=1403943 GN=Q609_ECAC00553G0002 PE=3 SV=1 - [W1X9J4_ECOLX]	193.043	41.94	38	4	4	9	93	10.7523	8.00146	0.000106874	0.000304549	0.000167942	0.000734356	0.350927	-1.51076
HMPREF1604_00117	V0VLZ4	Acriflavine resistance protein A OS=Escherichia coli 908519 OX=1268991 GN=HMPREF1604_00117 PE=3 SV=1 - [V0VLZ4_ECOLX]	3514.73	87.53	12	1	22	117	369	39.2534	5.23682	0.000106036	0.000302364	0.0451741	0.0149134	0.350692	-1.51172
G925_02287	A0A0E2L5U9	Outer membrane porin OS=Escherichia coli (strain UMEA 3162-1) OX=1281200 GN=G925_02287 PE=4 SV=1 - [A0A0E2L5U9_ECOU3]	58.41	9.44	26	2	2	2	180	18.506	4.79248	0.000108054	0.000308309	0.0125451	0.0069015	0.350473	-1.51263
AOX65_16080	A0A0T5XRY9	Peptidase M15 OS=Escherichia coli OX=562 GN=AOX65_16080 PE=3 SV=1 - [A0A0T5XRY9_ECOLX]	1309.11	34.91	1	3	11	44	401	43.4974	8.68994	0.00010292	0.000294322	0.00394961	0.00353203	0.349687	-1.51586
C6985_01220	A0A2T1LQ82	D-glycero-beta-D-manno-heptose 1,7-bisphosphate 7-phosphatase OS=Escherichia coli OX=562 GN=C6985_01220 PE=4 SV=1 - [A0A2T1LQ82_ECOLX]	36.11	10.64	5	1	2	3	188	20.9934	5.08447	0.000107444	0.000308156	0.0248368	0.0103931	0.348667	-1.52008
C1I57_38910	A0A2R9VWE6	Zinc resistance-associated protein ZraP (Fragment) OS=Escherichia coli OX=562 GN=C1I57_38910 PE=4 SV=1 - [A0A2R9VWE6_ECOLX]	90.42	11.34	41	1	1	2	97	10.6592	7.44482	0.000120919	0.000347022	0.0316	0.0121098	0.348447	-1.52099
AZZ83_000336	A0A243V5E2	Thiol:disulfide interchange protein (Fragment) OS=Escherichia coli OX=562 GN=AZZ83_000336 PE=3 SV=1 - [A0A243V5E2_ECOLX]	616.464	64.08	5	2	13	29	245	27.2131	7.26904	0.00010642	0.000306913	0.00137841	0.00205675	0.346743	-1.52806
AD23_1673	A0A029I2F2	Mannitol dehydrogenase Rossmann domain protein OS=Escherichia coli 2-005-03_S4_C3 OX=1444258 GN=AD23_1673 PE=3 SV=1 - [A0A029I2F2_ECOLX]	119.123	5.56	124	1	2	4	486	53.6842	5.8208	0.000102238	0.000295332	0.0019756	0.00248616	0.346179	-1.53041
ydcL	A0A024L339	Predicted lipoprotein OS=Escherichia coli OX=562 GN=ydcL PE=4 SV=1 - [A0A024L339_ECOLX]	1292.64	50	11	2	10	83	222	24.4155	8.32373	0.000102848	0.00029875	0.000969214	0.00172983	0.344262	-1.53842
yeiA	A0A029IP33	NAD-dependent dihydropyrimidine dehydrogenase subunit PreA OS=Escherichia coli 2-005-03_S4_C2 OX=1444228 GN=yeiA PE=4 SV=1 - [A0A029IP33_ECOLX]	484.184	26.76	78	11	11	27	411	45.0591	5.57959	0.000105367	0.000308564	0.000799376	0.00158885	0.341474	-1.55015
Q609_ECAC01165G0001	W1X9L2	Ribosomal-protein-serine acetyltransferase (Fragment) OS=Escherichia coli DORA_A_5_14_21 OX=1403943 GN=Q609_ECAC01165G0001 PE=4 SV=1 - [W1X9L2_ECOLX]	62.11	9.02	17	1	1	1	133	15.2527	5.80811	0.000105759	0.000309836	0.00695775	0.00479903	0.341338	-1.55073
UTI89_C2133	Q1RAK8	Outer membrane porin protein NmpC OS=Escherichia coli (strain UTI89 / UPEC) OX=364106 GN=UTI89_C2133 PE=3 SV=1 - [Q1RAK8_ECOUT]	1428.24	42.69	85	1	10	85	342	37.8289	4.70361	9.76867e-05	0.000286985	0.00587512	0.00435215	0.34039	-1.55474
C9E25_09955	A0A2T3V3J5	Thiosulfate sulfurtransferase PspE OS=Escherichia coli OX=562 GN=C9E25_09955 PE=4 SV=1 - [A0A2T3V3J5_ECOLX]	354.887	59.38	21	5	5	20	96	10.5975	6.78564	0.000104647	0.000309348	0.00469985	0.00383875	0.338284	-1.56369
APU18_18790	A0A066SUS1	Nitrous oxide-stimulated promoter family protein OS=Escherichia coli OX=562 GN=APU18_18790 PE=4 SV=1 - [A0A066SUS1_ECOLX]	0	13.16	31	2	2	2	114	13.54	9.56885	0.000105754	0.000313709	0.000660503	0.00147344	0.337108	-1.56872
A8C65_26245	A0A066T0R2	Cytosine methyltransferase OS=Escherichia coli OX=562 GN=A8C65_26245 PE=3 SV=1 - [A0A066T0R2_ECOLX]	63.0823	13.22	3	5	5	5	348	39.5631	7.86963	0.00010448	0.00031197	2.39206e-05	0.000235968	0.334902	-1.57819
AZZ83_003728	A0A2C9ZSF9	Anaerobic C4-dicarboxylate transporter DcuB (Fragment) OS=Escherichia coli OX=562 GN=AZZ83_003728 PE=4 SV=1 - [A0A2C9ZSF9_ECOLX]	164.533	4.72	22	2	2	5	445	47.7728	7.76709	0.000101524	0.000303237	0.0138315	0.00732259	0.334802	-1.57862
glpA	A0A0G3K5Y4	Glycerol-3-phosphate dehydrogenase OS=Escherichia coli PCN033 OX=1001989 GN=glpA PE=3 SV=1 - [A0A0G3K5Y4_ECOLX]	501.124	39.48	85	19	19	28	542	58.9404	6.7124	0.000104467	0.000312784	9.2984e-05	0.000539707	0.333992	-1.58212
ACU90_27545	A0A0P7N6B1	Uncharacterized protein OS=Escherichia coli OX=562 GN=ACU90_27545 PE=4 SV=1 - [A0A0P7N6B1_ECOLX]	159.273	45.6	2	5	5	8	125	13.6581	9.5249	0.000102618	0.000308129	3.43892e-05	0.000287409	0.333037	-1.58625
panC	B1LGT5	Pantothenate synthetase OS=Escherichia coli (strain SMS-3-5 / SECEC) OX=439855 GN=panC PE=3 SV=1 - [PANC_ECOSM]	576.578	47.35	46	1	13	40	283	31.5727	6.27783	0.000100372	0.000301645	0.0327208	0.0123723	0.332748	-1.5875
rpmJ	P0A7Q6	50S ribosomal protein L36 OS=Escherichia coli (strain K12) OX=83333 GN=rpmJ PE=1 SV=1 - [RL36_ECOLI]	43.04	21.05	1	1	1	1	38	4.36145	10.6821	8.9231e-05	0.000272103	0.00139872	0.00207396	0.327931	-1.60854
BU64_31985	A0A070F1Q9	Dimethyl sulfoxide reductase OS=Escherichia coli O128:H2 str. 2011C-3317 OX=1446581 GN=BU64_31985 PE=4 SV=1 - [A0A070F1Q9_ECOLX]	61.3248	20.98	37	3	4	6	205	22.8697	6.60986	0.000100761	0.000308553	0.0189451	0.00885374	0.326561	-1.61458
PU06_20445	A0A0B1MQH6	Hydrogenase OS=Escherichia coli OX=562 GN=PU06_20445 PE=4 SV=1 - [A0A0B1MQH6_ECOLX]	556.362	21.51	47	7	7	24	372	40.6889	7.13721	9.79681e-05	0.000300338	0.000633046	0.00144913	0.326193	-1.6162
CSC15_4439	A0A2T7YCC3	SmpA / OmlA family protein OS=Escherichia coli OX=562 GN=CSC15_4439 PE=4 SV=1 - [A0A2T7YCC3_ECOLX]	785.553	69.44	9	1	5	39	108	11.5557	7.23975	9.26472e-05	0.000284531	0.0421327	0.0143283	0.325614	-1.61876
fabA	A0A244AA48	3-hydroxydecanoyl-[acyl-carrier-protein] dehydratase OS=Escherichia coli OX=562 GN=fabA PE=3 SV=1 - [A0A244AA48_ECOLX]	1235.47	52.91	17	1	9	62	172	18.9567	6.56592	9.68498e-05	0.000299056	0.0247829	0.0103782	0.323852	-1.62659
CSC15_4453	A0A2T7Y1L9	Uncharacterized protein OS=Escherichia coli OX=562 GN=CSC15_4453 PE=4 SV=1 - [A0A2T7Y1L9_ECOLX]	272.803	81.82	4	2	3	15	77	8.74018	4.36084	9.62525e-05	0.000300396	0.000133317	0.000657672	0.320419	-1.64197
AL530_016650	A0A0G9FPX3	Outer membrane protein OmpW OS=Escherichia coli OX=562 GN=AL530_016650 PE=4 SV=1 - [A0A0G9FPX3_ECOLX]	4183.56	51.42	46	1	6	149	212	22.8833	6.52197	0.000102517	0.000320337	0.000789451	0.00157961	0.32003	-1.64372
WM48_24910	A0A192EYJ5	Uncharacterized protein OS=Escherichia coli OX=562 GN=WM48_24910 PE=4 SV=1 - [A0A192EYJ5_ECOLX]	303.35	22.33	1	12	12	17	627	69.2847	5.43994	9.57738e-05	0.000300552	0.00685031	0.0047568	0.318659	-1.64991
C4K41_21340	A0A2S5RLK2	Site-specific DNA-methyltransferase OS=Escherichia coli OX=562 GN=C4K41_21340 PE=4 SV=1 - [A0A2S5RLK2_ECOLX]	566.534	39.82	22	24	24	44	658	75.3621	5.74463	9.64067e-05	0.000302668	1.4385e-06	8.15063e-05	0.318523	-1.65053
glpK	A0A2T1LD07	Glycerol kinase OS=Escherichia coli OX=562 GN=glpK PE=4 SV=1 - [A0A2T1LD07_ECOLX]	1072.47	34.26	2	2	13	47	502	56.0351	5.43994	9.78816e-05	0.000307496	0.00132572	0.00201109	0.318318	-1.65146
AM270_20645	A0A0P7WJQ5	Acetyltransferase OS=Escherichia coli OX=562 GN=AM270_20645 PE=4 SV=1 - [A0A0P7WJQ5_ECOLX]	81.415	13.03	5	5	5	7	353	41.5174	8.89502	9.6907e-05	0.000305526	4.17066e-05	0.000320986	0.317181	-1.65662
UTI89_C4937	Q1R2S4	Uncharacterized protein OS=Escherichia coli (strain UTI89 / UPEC) OX=364106 GN=UTI89_C4937 PE=4 SV=1 - [Q1R2S4_ECOUT]	488.55	28.8	2	25	25	44	986	113.448	5.68115	9.67242e-05	0.000305681	3.98122e-06	0.000113156	0.316422	-1.66008
fim	A0A1D7PZZ1	Fimbrial subunit type 1 OS=Escherichia coli OX=562 GN=fim PE=4 SV=1 - [A0A1D7PZZ1_ECOLX]	77.38	10.92	35	1	1	2	119	12.4281	5.12256	9.23066e-05	0.000293326	0.000505281	0.00131696	0.314689	-1.668
lysS	A0A0V9R803	Lysine--tRNA ligase OS=Escherichia coli OX=562 GN=lysS PE=3 SV=1 - [A0A0V9R803_ECOLX]	3030.64	63.37	4	1	30	184	505	57.8022	5.32568	9.39897e-05	0.000300222	2.41123e-06	9.54506e-05	0.313068	-1.67545
aceB	A0A029HCM8	Malate synthase OS=Escherichia coli 2-005-03_S4_C3 OX=1444258 GN=aceB PE=3 SV=1 - [A0A029HCM8_ECOLX]	1120.5	47.28	12	2	20	70	533	60.2315	5.59229	8.99164e-05	0.000288687	0.00749457	0.00500829	0.311467	-1.68285
selD	A0A029HZ53	Selenide, water dikinase OS=Escherichia coli 2-005-03_S4_C3 OX=1444258 GN=selD PE=3 SV=1 - [A0A029HZ53_ECOLX]	760.947	54.18	43	1	13	43	347	36.6657	5.42725	9.51984e-05	0.000305862	0.0338415	0.0126279	0.311246	-1.68387
A8C65_26235	A0A178SLI6	Uncharacterized protein OS=Escherichia coli OX=562 GN=A8C65_26235 PE=4 SV=1 - [A0A178SLI6_ECOLX]	96.59	10.82	2	6	6	8	527	59.2588	6.49365	9.34682e-05	0.000300719	9.2864e-06	0.000154228	0.310816	-1.68587
HMPREF9530_04824	D8AE21	Uncharacterized protein OS=Escherichia coli (strain MS 21-1) OX=749527 GN=HMPREF9530_04824 PE=4 SV=1 - [D8AE21_ECOMS]	108.26	60	6	1	2	6	35	4.0359	5.78271	9.7361e-05	0.000314307	0.000212481	0.000843897	0.309764	-1.69076
yeiN	A0A0C2EIH8	Pseudouridine-5'-phosphate glycosidase OS=Escherichia coli OX=562 GN=yeiN PE=3 SV=1 - [A0A0C2EIH8_ECOLX]	412.811	54.49	89	9	13	28	312	32.9834	5.16064	9.84911e-05	0.000318548	0.00260634	0.00288805	0.309187	-1.69345
BIQ87_18770	A0A0J2AXM3	Bacterioferritin OS=Escherichia coli OX=562 GN=BIQ87_18770 PE=3 SV=1 - [A0A0J2AXM3_ECOLX]	1743.64	81.65	5	7	10	98	158	18.5133	4.80518	8.70689e-05	0.000282615	8.37507e-05	0.000507917	0.308083	-1.69861
AL530_022485	A0A0G9FNA0	Aldehyde oxidase OS=Escherichia coli OX=562 GN=AL530_022485 PE=4 SV=1 - [A0A0G9FNA0_ECOLX]	890.173	40.12	3	1	12	38	329	36.2001	6.26514	9.28413e-05	0.000301361	0.000227234	0.000875883	0.308073	-1.69865
hchA	B7NRB5	Protein/nucleic acid deglycase HchA OS=Escherichia coli O7:K1 (strain IAI39 / ExPEC) OX=585057 GN=hchA PE=3 SV=1 - [HCHA_ECO7I]	1552.46	56.54	13	1	13	109	283	31.2166	6.02393	8.5508e-05	0.000279533	0.000246102	0.00091655	0.305896	-1.70889
AW059_09520	A0A066SSV4	Bacteriocin immunity protein OS=Escherichia coli OX=562 GN=AW059_09520 PE=4 SV=1 - [A0A066SSV4_ECOLX]	0	17.71	10	2	2	3	96	11.4747	4.83057	9.56273e-05	0.000314232	0.000631145	0.0014474	0.304321	-1.71634
C5P44_26435	A0A2S7GEP8	Glutamate decarboxylase (Fragment) OS=Escherichia coli OX=562 GN=C5P44_26435 PE=4 SV=1 - [A0A2S7GEP8_ECOLX]	14756.2	89.86	74	1	20	614	286	32.2169	5.85889	8.86205e-05	0.000293032	0.000385362	0.0011548	0.302426	-1.72534
AZZ83_000293	A0A243V5R1	Uncharacterized protein (Fragment) OS=Escherichia coli OX=562 GN=AZZ83_000293 PE=4 SV=1 - [A0A243V5R1_ECOLX]	41.5102	9.66	76	2	2	2	207	23.3952	8.99756	9.62334e-05	0.000318339	3.8887e-05	0.000308697	0.302299	-1.72595
lysS	Q83W87	Lysine--tRNA ligase OS=Escherichia coli OX=562 GN=lysS PE=3 SV=1 - [Q83W87_ECOLX]	1025.08	32.93	2	12	14	41	498	57.7252	5.88428	9.2435e-05	0.000305781	0.00397148	0.00354046	0.302292	-1.72599
pepE	A0A066T2M0	Peptidase E OS=Escherichia coli OX=562 GN=pepE PE=3 SV=1 - [A0A066T2M0_ECOLX]	246.818	30.57	33	1	5	11	229	24.569	6.02393	8.9623e-05	0.000296817	0.0197012	0.00906647	0.301947	-1.72763
AC45_2356	A0A070SRE1	DEAD/DEAH box helicase family protein OS=Escherichia coli 2-210-07_S3_C3 OX=1444180 GN=AC45_2356 PE=4 SV=1 - [A0A070SRE1_ECOLX]	329.667	26.47	20	25	25	35	986	111.303	5.70654	9.19406e-05	0.0003051	9.01938e-06	0.000152994	0.301346	-1.73051
glpQ	A0A029IQ04	Glycerophosphoryl diester phosphodiesterase OS=Escherichia coli 2-005-03_S4_C2 OX=1444228 GN=glpQ PE=4 SV=1 - [A0A029IQ04_ECOLX]	3415.66	78.49	15	3	23	140	358	40.8003	5.8208	9.12365e-05	0.000303158	0.000190458	0.000792363	0.300953	-1.73239
AZZ83_004298	A0A192EQC0	Protein YdgH OS=Escherichia coli OX=562 GN=AZZ83_004298 PE=4 SV=1 - [A0A192EQC0_ECOLX]	1380.49	66.88	9	1	18	71	314	33.8965	9.27588	8.95143e-05	0.000302137	2.67967e-07	5.74872e-05	0.296271	-1.75501
manX	A0A029HZB9	PTS system mannose-specific EIIAB component OS=Escherichia coli 2-005-03_S4_C3 OX=1444258 GN=manX PE=4 SV=1 - [A0A029HZB9_ECOLX]	1623.01	60.68	22	2	16	84	323	35.0986	6.02393	9.06045e-05	0.000306349	0.00111282	0.00183411	0.295756	-1.75752
AL530_012605	A0A178RJB2	DNA uptake protein OS=Escherichia coli OX=562 GN=AL530_012605 PE=4 SV=1 - [A0A178RJB2_ECOLX]	261.956	20.26	3	7	7	12	390	44.0242	7.50342	8.95162e-05	0.000303348	0.0023665	0.00274039	0.295094	-1.76075
BE963_28325	A0A023L065	Uncharacterized protein OS=Escherichia coli OX=562 GN=BE963_28325 PE=4 SV=1 - [A0A023L065_ECOLX]	0	11.27	13	1	1	1	71	7.78572	7.25439	7.41886e-05	0.000252468	0.0409272	0.0141	0.293853	-1.76683
AZZ83_001434	A0A192EV84	Monooxygenase OS=Escherichia coli OX=562 GN=AZZ83_001434 PE=4 SV=1 - [A0A192EV84_ECOLX]	217.251	19.1	10	2	5	9	335	37.0818	6.40479	8.61648e-05	0.000294684	0.000160078	0.00071839	0.292397	-1.774
fimC	V9PYM7	FimC (Fragment) OS=Escherichia coli OX=562 GN=fimC PE=3 SV=1 - [V9PYM7_ECOLX]	128.638	27.27	141	3	4	8	165	18.3537	9.5835	8.03509e-05	0.00027516	0.00284787	0.00302561	0.292015	-1.77589
ECs0486	Q8XE63	Ubiquinol oxidase subunit 2 OS=Escherichia coli O157:H7 OX=83334 GN=ECs0486 PE=3 SV=1 - [Q8XE63_ECO57]	591.857	35.87	6	2	7	29	315	34.9076	7.66455	8.27753e-05	0.000284013	0.000881204	0.00166056	0.291449	-1.77868
ORF9	Q9AI23	PTS ascorbate transporter subunit IIB OS=Escherichia coli OX=562 GN=ORF9 PE=4 SV=1 - [Q9AI23_ECOLX]	452.368	55.79	10	5	5	10	95	9.98623	5.41455	9.19598e-05	0.000315798	0.00275845	0.00297603	0.291199	-1.77992
yecD	A0A0K5DHD5	Putative isochorismatase OS=Escherichia coli OX=562 GN=yecD PE=4 SV=1 - [A0A0K5DHD5_ECOLX]	182.09	33.51	12	1	5	10	188	20.4896	5.80811	8.6437e-05	0.000297688	0.000114199	0.000606352	0.290361	-1.78408
BMR26_26455	A0A2B7MWI2	Transcriptional regulator (Fragment) OS=Escherichia coli OX=562 GN=BMR26_26455 PE=4 SV=1 - [A0A2B7MWI2_ECOLX]	23.73	5.26	10	1	1	1	152	17.3888	6.66846	8.73352e-05	0.000302261	0.000178043	0.000761095	0.28894	-1.79116
manC	Q9EXX9	GDP-mannose pyrophosphorylase OS=Escherichia coli OX=562 GN=manC PE=3 SV=1 - [Q9EXX9_ECOLX]	501.414	46.97	207	18	20	43	479	53.7542	5.5542	8.85936e-05	0.000307733	8.09472e-06	0.000148282	0.287891	-1.7964
AL530_015930	A0A135PUV8	ABC transporter periplasmic binding protein ydcS OS=Escherichia coli OX=562 GN=AL530_015930 PE=4 SV=1 - [A0A135PUV8_ECOLX]	602.605	48.29	24	1	15	37	381	42.2781	7.07861	7.91664e-05	0.000275801	0.000607937	0.00142576	0.287042	-1.80067
BXT93_11590	A0A1V2GF71	Xanthine dehydrogenase molybdenum-binding subunit XdhA (Fragment) OS=Escherichia coli OX=562 GN=BXT93_11590 PE=4 SV=1 - [A0A1V2GF71_ECOLX]	61.57	4.26	122	1	1	1	258	27.9205	6.0874	0.000106968	0.000373502	0.0416913	0.0142454	0.286392	-1.80394
tktA	A0A0K3ZJ48	Transketolase OS=Escherichia coli OX=562 GN=tktA PE=3 SV=1 - [A0A0K3ZJ48_ECOLX]	2824.32	46.15	56	1	25	162	663	72.1949	5.66846	9.03809e-05	0.000317459	9.04112e-05	0.000531126	0.284701	-1.81248
cscA	A0A0K6AX70	Sucrose-6-phosphate hydrolase OS=Escherichia coli OX=562 GN=cscA PE=3 SV=1 - [A0A0K6AX70_ECOLX]	25.58	1.47	2	1	1	1	477	54.3503	6.21436	8.84642e-05	0.000311694	7.08147e-05	0.00045826	0.283817	-1.81696
iroN	A0A2R4KYK6	Catecholate siderophore receptor (Fragment) OS=Escherichia coli OX=562 GN=iroN PE=4 SV=1 - [A0A2R4KYK6_ECOLX]	24.59	4.88	29	1	1	1	205	22.7873	6.01123	8.538e-05	0.000302113	5.76942e-06	0.000132266	0.282609	-1.82312
BET08_36410	A0A1V2T5N7	ATP phosphoribosyltransferase (Fragment) OS=Escherichia coli OX=562 GN=BET08_36410 PE=3 SV=1 - [A0A1V2T5N7_ECOLX]	92.1678	20.51	51	1	4	8	195	21.5603	5.96045	8.35757e-05	0.000297298	0.0293068	0.0115611	0.281118	-1.83075
ECW_m2196	E0J139	Putative glycosyltransferase OS=Escherichia coli (strain ATCC 9637 / CCM 2024 / DSM 1116 / NCIMB 8666 / NRRL B-766 / W) OX=566546 GN=ECW_m2196 PE=4 SV=1 - [E0J139_ECOLW]	53.9467	11.54	3	3	3	4	286	33.2431	8.6167	9.08953e-05	0.000326015	0.000684053	0.00149332	0.278807	-1.84266
AZZ83_003064	A0A192EXF5	Restriction endonuclease subunit M OS=Escherichia coli OX=562 GN=AZZ83_003064 PE=4 SV=1 - [A0A192EXF5_ECOLX]	273.183	35.58	7	1	14	26	489	55.2232	5.41455	8.39828e-05	0.000303594	1.53465e-07	5.74872e-05	0.276629	-1.85398
A13A_02048	S1PWK7	3-hydroxyacyl-CoA dehydrogenase OS=Escherichia coli KTE182 OX=1181728 GN=A13A_02048 PE=4 SV=1 - [S1PWK7_ECOLX]	119.893	17.71	2	5	5	8	288	32.3343	6.59521	9.36251e-05	0.000338479	0.00103695	0.00177834	0.276606	-1.8541
tyrS	A0A0B0TPG4	Tyrosine--tRNA ligase OS=Escherichia coli OX=562 GN=tyrS PE=3 SV=1 - [A0A0B0TPG4_ECOLX]	1202.44	38.92	35	1	14	60	424	47.4961	6.16357	8.28476e-05	0.000300653	0.0210889	0.00944047	0.275559	-1.85957
rpoC	A0A1M0D356	DNA-directed RNA polymerase subunit beta' OS=Escherichia coli OX=562 GN=rpoC PE=3 SV=1 - [A0A1M0D356_ECOLX]	9610.91	62.62	33	1	75	471	1407	155.063	7.07861	8.17367e-05	0.000297262	0.0288303	0.011443	0.274966	-1.86268
ybcL	A0A0A2R7B6	Kinase inhibitor OS=Escherichia coli OX=562 GN=ybcL PE=4 SV=1 - [A0A0A2R7B6_ECOLX]	119.68	7.1	14	1	1	3	183	19.3787	7.98682	8.1636e-05	0.000298644	0.00197694	0.00248697	0.273356	-1.87115
cdiI	Q0T964	Immunity protein CdiI OS=Escherichia coli O6:K15:H31 (strain 536 / UPEC) OX=362663 GN=cdiI PE=1 SV=1 - [CDII_ECOL5]	273.743	64.84	1	7	7	15	128	14.8079	4.83057	8.27254e-05	0.000302881	6.63273e-06	0.000139072	0.273128	-1.87235
tagB	A0A2K9RC00	Glycerophosphotransferase OS=Escherichia coli OX=562 GN=tagB PE=4 SV=1 - [A0A2K9RC00_ECOLX]	502.312	23.14	15	32	32	52	1266	148.508	8.04541	8.63907e-05	0.000317749	9.24934e-06	0.000154059	0.271884	-1.87894
tig	Q8FKA7	Trigger factor OS=Escherichia coli O6:H1 (strain CFT073 / ATCC 700928 / UPEC) OX=199310 GN=tig PE=3 SV=1 - [TIG_ECOL6]	7077.38	65.74	8	2	28	240	432	48.2209	4.85596	8.14976e-05	0.000301021	0.0435644	0.014605	0.270738	-1.88503
trpA	A0A1U9T2S4	Tryptophan synthase alpha chain OS=Escherichia coli OX=562 GN=trpA PE=3 SV=1 - [A0A1U9T2S4_ECOLX]	297.467	42.91	39	1	10	24	268	28.679	5.33838	8.27909e-05	0.000308945	0.00971763	0.0058968	0.267979	-1.89981
WM48_10475	A0A192EQ12	Non-ribosomal peptide synthetase OS=Escherichia coli OX=562 GN=WM48_10475 PE=4 SV=1 - [A0A192EQ12_ECOLX]	149.678	4.25	8	2	9	11	2166	242.761	6.66846	8.88043e-05	0.000331633	0.000756308	0.00154935	0.267779	-1.90088
AL530_011810	A0A067HFD2	Glycosyl transferase family 1 OS=Escherichia coli OX=562 GN=AL530_011810 PE=4 SV=1 - [A0A067HFD2_ECOLX]	93.0714	18.08	4	7	7	11	343	39.0684	9.12939	8.14676e-05	0.000304919	1.10245e-05	0.000161148	0.267178	-1.90413
CRT55_12445	A0A2I6JDE7	Arabinose ABC transporter substrate-binding protein OS=Escherichia coli OX=562 GN=CRT55_12445 PE=4 SV=1 - [A0A2I6JDE7_ECOLX]	540.223	39.08	25	1	10	26	325	35.2711	6.27783	8.27012e-05	0.000309989	2.31778e-05	0.000232937	0.266788	-1.90624
glpT	A0A0B1MWX1	sn-glycerol-3-phosphate transporter OS=Escherichia coli OX=562 GN=glpT PE=4 SV=1 - [A0A0B1MWX1_ECOLX]	76.3126	18.36	40	9	9	17	452	50.3398	8.70459	7.89257e-05	0.000296289	0.000137721	0.000668478	0.266381	-1.90844
BET08_26730	A0A1V2SW59	Uncharacterized protein (Fragment) OS=Escherichia coli OX=562 GN=BET08_26730 PE=4 SV=1 - [A0A1V2SW59_ECOLX]	87.2581	16.45	43	2	2	4	152	15.4195	9.70068	8.09687e-05	0.00030558	0.00626557	0.00451657	0.264968	-1.91611
ECDEC1B_4968	H4IJJ5	Bacterial extracellular solute-binding s, 5 Middle family protein OS=Escherichia coli DEC1B OX=868134 GN=ECDEC1B_4968 PE=4 SV=1 - [H4IJJ5_ECOLX]	491.07	35.25	6	2	13	22	522	57.0365	7.66455	8.04165e-05	0.000306841	4.35685e-05	0.000328699	0.262079	-1.93193
BTQ06_24360	A0A2A2BZI2	Uncharacterized protein OS=Escherichia coli OX=562 GN=BTQ06_24360 PE=4 SV=1 - [A0A2A2BZI2_ECOLX]	906.824	64	4	6	6	33	125	14.1384	10.0522	7.92843e-05	0.000305078	0.00323705	0.0032249	0.259882	-1.94407
AZZ83_004272	A0A192ENT7	Dipeptidyl carboxypeptidase OS=Escherichia coli OX=562 GN=AZZ83_004272 PE=3 SV=1 - [A0A192ENT7_ECOLX]	950.395	38.33	151	1	21	54	681	77.607	5.61768	7.65497e-05	0.000294988	0.0299798	0.0117255	0.259501	-1.94619
B2H83_13145	A0A1S6TCP9	Uncharacterized protein OS=Escherichia coli M8 OX=1392854 GN=B2H83_13145 PE=4 SV=1 - [A0A1S6TCP9_ECOLX]	2897.65	68.18	26	1	7	93	110	11.987	9.43701	7.55323e-05	0.000292417	0.00373221	0.0034452	0.258303	-1.95286
EATG_00518	A0A1X3KQP5	Putative homeobox protein OS=Escherichia coli H605 OX=656410 GN=EATG_00518 PE=4 SV=1 - [A0A1X3KQP5_ECOLX]	820.862	53.17	19	1	5	45	126	12.917	4.88135	6.84604e-05	0.000265387	0.02877	0.011428	0.257965	-1.95475
ECO26H__190007	A0A0A8UB94	Uncharacterized protein OS=Escherichia coli O26:H11 OX=244319 GN=ECO26H__190007 PE=4 SV=1 - [A0A0A8UB94_ECOLX]	106.175	19.56	6	5	5	8	271	31.1249	9.5249	7.89095e-05	0.000310562	2.17183e-06	9.28609e-05	0.254086	-1.97661
rne	A0A0J8XSB6	Ribonuclease E OS=Escherichia coli OX=562 GN=rne PE=3 SV=1 - [A0A0J8XSB6_ECOLX]	2626.65	48.92	28	2	41	121	1061	118.189	5.57959	7.4792e-05	0.000297617	0.000403358	0.00118199	0.251303	-1.9925
ECW_m2193	E0J142	Putative UDP-glucosamine-4-epimerase OS=Escherichia coli (strain ATCC 9637 / CCM 2024 / DSM 1116 / NCIMB 8666 / NRRL B-766 / W) OX=566546 GN=ECW_m2193 PE=3 SV=1 - [E0J142_ECOLW]	498.168	39.4	10	10	10	32	335	37.02	6.87354	7.69954e-05	0.00030709	1.01945e-05	0.000158063	0.250726	-1.99582
AZZ83_004374	A0A192EP27	Monooxygenase OS=Escherichia coli OX=562 GN=AZZ83_004374 PE=4 SV=1 - [A0A192EP27_ECOLX]	157.72	53.47	6	3	5	8	101	11.2668	5.38916	7.58864e-05	0.000306349	0.00207502	0.00254491	0.247712	-2.01326
BIZ41_14405	A0A271QVE8	Protease OS=Escherichia coli OX=562 GN=BIZ41_14405 PE=4 SV=1 - [A0A271QVE8_ECOLX]	743.6	80.81	15	2	11	46	172	18.8469	5.46533	7.29009e-05	0.000295027	0.0169967	0.00827638	0.247099	-2.01684
acpP_1	A0A066QZ76	Acyl carrier protein OS=Escherichia coli OX=562 GN=acpP_1 PE=3 SV=1 - [A0A066QZ76_ECOLX]	165.603	30.12	7	2	2	6	83	9.57806	4.70361	7.5867e-05	0.000308562	4.91741e-05	0.000358422	0.245873	-2.02401
rlmL	A0A0V9REY7	Ribosomal RNA large subunit methyltransferase K/L OS=Escherichia coli OX=562 GN=rlmL PE=3 SV=1 - [A0A0V9REY7_ECOLX]	451.907	34.62	20	2	25	43	702	78.7745	8.82178	7.1146e-05	0.000291933	2.0638e-05	0.000221652	0.243706	-2.03678
ECJG_04303	F4TP10	Insertion element (Fragment) OS=Escherichia coli M718 OX=656419 GN=ECJG_04303 PE=4 SV=1 - [F4TP10_ECOLX]	50.26	20.45	53	1	1	2	44	5.26546	4.99561	7.93651e-05	0.000326989	0.000403394	0.00118204	0.242715	-2.04267
maeA	D7XZW6	NAD-dependent malic enzyme OS=Escherichia coli MS 115-1 OX=749537 GN=maeA PE=3 SV=1 - [D7XZW6_ECOLX]	1775.32	54.07	51	1	21	92	540	60.2756	5.18604	7.0337e-05	0.00029434	0.000454654	0.00125387	0.238965	-2.06513
manB	A0A0A7DNE2	Phosphomannomutase OS=Escherichia coli OX=562 GN=manB PE=3 SV=1 - [A0A0A7DNE2_ECOLX]	1079.27	44.74	291	14	19	53	456	50.3727	5.57959	7.33153e-05	0.000307115	6.2908e-06	0.00013652	0.238722	-2.06659
J444_pF60	A0A140WZ37	Uncharacterized protein OS=Escherichia coli ACN001 OX=1311757 GN=J444_pF60 PE=4 SV=1 - [A0A140WZ37_ECOLX]	66.71	59.46	11	2	2	3	37	4.00304	8.57275	7.12758e-05	0.000307913	1.77998e-06	8.75914e-05	0.23148	-2.11104
G925_01869	A0A0E2L4K0	Uncharacterized protein OS=Escherichia coli (strain UMEA 3162-1) OX=1281200 GN=G925_01869 PE=4 SV=1 - [A0A0E2L4K0_ECOU3]	127.304	17.72	11	1	1	3	79	8.63811	6.02393	7.00994e-05	0.000307527	0.000306241	0.00103228	0.227945	-2.13324
ttdB	A0A029HJ31	L(+)-tartrate dehydratase subunit beta OS=Escherichia coli 2-005-03_S4_C3 OX=1444258 GN=ttdB PE=4 SV=1 - [A0A029HJ31_ECOLX]	111.658	23.38	29	5	5	8	201	22.6638	6.85889	7.24541e-05	0.000320851	0.00012702	0.00064159	0.225819	-2.14676
WM48_16205	A0A192ETU5	Uncharacterized protein OS=Escherichia coli OX=562 GN=WM48_16205 PE=1 SV=1 - [A0A192ETU5_ECOLX]	15.5	19.81	1	2	2	3	106	13.0564	5.5415	7.00681e-05	0.000313931	0.000116784	0.000613742	0.223196	-2.16362
AL530_012635	A0A136TBS2	Molecular chaperone Tir OS=Escherichia coli OX=562 GN=AL530_012635 PE=4 SV=1 - [A0A136TBS2_ECOLX]	84.5633	13.02	1	2	2	3	169	19.4209	8.77783	6.66364e-05	0.000321252	2.36045e-05	0.000234692	0.207427	-2.26932
manC	A0A0A6ZEM4	Mannose-1-phosphate guanyltransferase OS=Escherichia coli OX=562 GN=manC PE=3 SV=2 - [A0A0A6ZEM4_ECOLX]	32.63	5.27	203	1	3	7	474	53.761	5.35107	6.37755e-05	0.0003075	3.37101e-07	5.74872e-05	0.2074	-2.26951
AZZ83_000588	A0A192ENE4	Low specificity L-threonine aldolase OS=Escherichia coli OX=562 GN=AZZ83_000588 PE=4 SV=1 - [A0A192ENE4_ECOLX]	410.679	39.04	65	1	12	26	333	36.5166	6.55127	6.06609e-05	0.000299152	2.67511e-05	0.000246562	0.202776	-2.30204
aceF	A0A0D8WJY6	Acetyltransferase component of pyruvate dehydrogenase complex OS=Escherichia coli OX=562 GN=aceF PE=3 SV=1 - [A0A0D8WJY6_ECOLX]	5354.93	56.51	14	1	31	220	630	66.0868	5.17334	7.81781e-05	0.000388581	0.0498871	0.0157798	0.201189	-2.31338
clbE	A0A2P6IYS1	Colibactin biosynthesis aminomalonyl-acyl carrier protein ClbE OS=Escherichia coli OX=562 GN=clbE PE=4 SV=1 - [A0A2P6IYS1_ECOLX]	79.1967	19.51	3	2	2	3	82	9.48208	5.41455	6.34366e-05	0.00032048	0.000515781	0.00132919	0.197942	-2.33685
tolA	A0A192EM62	Protein TolA OS=Escherichia coli OX=562 GN=tolA PE=4 SV=1 - [A0A192EM62_ECOLX]	152.826	28.5	32	2	12	15	421	43.1445	9.01221	6.17639e-05	0.000315246	0.000832309	0.00161864	0.195923	-2.35164
AML35_11355	A0A0U4US45	Uncharacterized protein OS=Escherichia coli OX=562 GN=AML35_11355 PE=4 SV=1 - [A0A0U4US45_ECOLX]	68.34	25.42	3	1	1	2	59	6.98462	9.70068	6.01967e-05	0.000310085	3.69994e-06	0.000110468	0.194129	-2.36491
clbS	Q0P7K8	Colibactin self-protection protein ClbS OS=Escherichia coli OX=562 GN=clbS PE=4 SV=1 - [Q0P7K8_ECOLX]	1070.98	52.35	2	8	8	59	170	19.6383	8.52881	5.91408e-05	0.000306202	1.06084e-05	0.000159647	0.193143	-2.37226
A8C65_27195	A0A210B4C8	DUF4440 domain-containing protein OS=Escherichia coli OX=562 GN=A8C65_27195 PE=4 SV=1 - [A0A210B4C8_ECOLX]	252.775	34.07	3	7	7	21	182	20.3992	6.20166	7.89133e-05	0.000416796	0.0137213	0.00728725	0.189333	-2.401
HMPREF1604_03955	V0UUJ1	Uncharacterized protein (Fragment) OS=Escherichia coli 908519 OX=1268991 GN=HMPREF1604_03955 PE=3 SV=1 - [V0UUJ1_ECOLX]	7348.76	91.67	1	1	5	241	84	9.23752	8.49951	4.97435e-05	0.000265742	0.00571687	0.00428335	0.187187	-2.41745
dxs	A0A0J2B710	1-deoxy-D-xylulose-5-phosphate synthase OS=Escherichia coli OX=562 GN=dxs PE=3 SV=1 - [A0A0J2B710_ECOLX]	455.172	30.32	24	1	14	36	620	67.5758	6.62451	5.50676e-05	0.000298933	2.68001e-06	9.79356e-05	0.184214	-2.44054
BH694_24930	A0A2R9V2Q0	Cytotoxin OS=Escherichia coli OX=562 GN=BH694_24930 PE=4 SV=1 - [A0A2R9V2Q0_ECOLX]	99.5703	5.13	9	6	6	6	1014	113.831	5.37646	5.12714e-05	0.000285666	4.28972e-05	0.000325953	0.179481	-2.4781
accD	Q0TFD0	Acetyl-coenzyme A carboxylase carboxyl transferase subunit beta OS=Escherichia coli O6:K15:H31 (strain 536 / UPEC) OX=362663 GN=accD PE=3 SV=1 - [ACCD_ECOL5]	693.877	50.66	1	1	14	40	304	33.3141	7.6792	5.15113e-05	0.000291747	1.63333e-05	0.00019852	0.176561	-2.50176
AC067_14435	A0A0L7AGE6	Peptidyl-prolyl cis-trans isomerase OS=Escherichia coli OX=562 GN=AC067_14435 PE=3 SV=1 - [A0A0L7AGE6_ECOLX]	1980.34	62.8	4	2	13	114	164	18.1549	6.0874	5.16551e-05	0.00029641	0.000998757	0.00175146	0.174269	-2.52061
pckA	V0ANF8	Phosphoenolpyruvate carboxykinase (ATP) OS=Escherichia coli 909945-2 OX=1269007 GN=pckA PE=3 SV=1 - [V0ANF8_ECOLX]	3682.38	61.67	10	1	24	152	540	59.605	5.80811	5.19459e-05	0.000298254	0.000296649	0.00101532	0.174167	-2.52146
HMPREF1604_04122	V0UYT3	Oxidoreductase family, alpha/beta domain protein OS=Escherichia coli 908519 OX=1268991 GN=HMPREF1604_04122 PE=4 SV=1 - [V0UYT3_ECOLX]	944.824	55.24	10	1	11	43	286	31.8002	5.69385	4.99683e-05	0.000294598	7.61868e-06	0.000145549	0.169616	-2.55966
A8C65_23395	A0A192EWV5	Uncharacterized protein OS=Escherichia coli OX=562 GN=A8C65_23395 PE=4 SV=1 - [A0A192EWV5_ECOLX]	84.87	14.75	1	2	2	4	122	13.3527	5.40186	5.08895e-05	0.000303598	7.76454e-06	0.000146411	0.167621	-2.57672
C4K41_21930	A0A152S374	Transcriptional regulator OS=Escherichia coli OX=562 GN=C4K41_21930 PE=4 SV=1 - [A0A152S374_ECOLX]	57.4	5.15	2	1	1	1	233	26.3794	4.88135	4.38136e-05	0.000263298	0.0411212	0.0141372	0.166403	-2.58725
sucB_2	A0A0J2A305	Dihydrolipoyllysine-residue succinyltransferase component of 2-oxoglutarate dehydrogenase complex OS=Escherichia coli OX=562 GN=sucB_2 PE=3 SV=1 - [A0A0J2A305_ECOLX]	3774.37	49.63	28	1	17	160	405	44.014	5.80811	4.92852e-05	0.000296718	0.000115649	0.000610516	0.166101	-2.58987
AD17_0050	A0A069XSP4	Outer membrane transport family protein OS=Escherichia coli 3-373-03_S4_C2 OX=1444252 GN=AD17_0050 PE=4 SV=1 - [A0A069XSP4_ECOLX]	872.654	34.08	50	2	8	27	446	48.4835	5.30029	4.69168e-05	0.000296168	6.66366e-07	5.81288e-05	0.158413	-2.65824
ttdA	A0A029ILG2	L(+)-tartrate dehydratase subunit alpha OS=Escherichia coli 2-005-03_S4_C2 OX=1444228 GN=ttdA PE=4 SV=1 - [A0A029ILG2_ECOLX]	265.966	25.74	63	8	8	12	303	32.7147	6.53662	5.25623e-05	0.0003383	0.00014498	0.000685553	0.155372	-2.6862
AZZ83_000913	A0A192EP96	Acetyltransferase OS=Escherichia coli OX=562 GN=AZZ83_000913 PE=4 SV=1 - [A0A192EP96_ECOLX]	65.39	7.33	2	1	1	1	150	17.0995	5.36377	4.39258e-05	0.000290008	1.03351e-05	0.000158611	0.151464	-2.72295
AZZ83_001017	A0A192EN40	Protein YciF OS=Escherichia coli OX=562 GN=AZZ83_001017 PE=4 SV=1 - [A0A192EN40_ECOLX]	211.324	37.35	14	2	5	12	166	18.7157	5.47803	4.38813e-05	0.000296605	0.00096086	0.00172357	0.147945	-2.75687
AZZ83_002452	A0A192ESH5	Phosphate acetyltransferase OS=Escherichia coli OX=562 GN=AZZ83_002452 PE=3 SV=1 - [A0A192ESH5_ECOLX]	4759.08	52.24	1	1	29	227	714	77.147	5.41455	4.48067e-05	0.000303821	0.000512317	0.00132519	0.147478	-2.76143
AZZ83_004194	A0A192EPT8	Flagellin OS=Escherichia coli OX=562 GN=AZZ83_004194 PE=3 SV=1 - [A0A192EPT8_ECOLX]	3576.05	69.55	154	15	27	107	555	56.5914	4.86865	4.74312e-05	0.000323972	0.00189033	0.00243326	0.146405	-2.77196
fabG	A0A210BFI9	3-oxoacyl-ACP reductase (Fragment) OS=Escherichia coli OX=562 GN=fabG PE=4 SV=1 - [A0A210BFI9_ECOLX]	109.77	19.65	14	4	4	4	173	18.1092	7.02002	4.32802e-05	0.000299978	1.95627e-06	9.01464e-05	0.144278	-2.79308
C4K41_21435	A0A2S5RLJ5	DNA-binding protein OS=Escherichia coli OX=562 GN=C4K41_21435 PE=4 SV=1 - [A0A2S5RLJ5_ECOLX]	492.239	47.01	3	4	6	25	134	15.0969	5.12256	4.23603e-05	0.000303627	1.24242e-05	0.000171519	0.139515	-2.84151
AL530_012575	A0A136TC53	DNA-binding protein OS=Escherichia coli OX=562 GN=AL530_012575 PE=3 SV=1 - [A0A136TC53_ECOLX]	464.419	55.97	10	4	6	20	134	15.0388	5.2749	4.06026e-05	0.000304388	2.53385e-06	9.66338e-05	0.133391	-2.90627
rph	Q0TBG6	Ribonuclease PH OS=Escherichia coli O6:K15:H31 (strain 536 / UPEC) OX=362663 GN=rph PE=3 SV=1 - [RNPH_ECOL5]	310.357	28.99	5	1	5	12	238	25.324	5.70654	3.95216e-05	0.000301595	1.40992e-05	0.000183937	0.131042	-2.9319
C6986_13290	A0A2T1MXG3	Phosphomannomutase CpsG OS=Escherichia coli OX=562 GN=C6986_13290 PE=4 SV=1 - [A0A2T1MXG3_ECOLX]	637.137	17.11	8	1	6	21	456	50.2316	5.5542	4.02852e-05	0.000318369	2.62101e-05	0.000244646	0.126536	-2.98238
yqjD	A0A192EUF4	DUF883 domain-containing protein OS=Escherichia coli OX=562 GN=yqjD PE=4 SV=1 - [A0A192EUF4_ECOLX]	2339.32	50.5	2	1	6	71	101	11.0719	9.08545	3.37957e-05	0.000301779	0.00192367	0.00245423	0.111988	-3.15858
ppsA	A0A0H2V902	Phosphoenolpyruvate synthase OS=Escherichia coli O6:H1 (strain CFT073 / ATCC 700928 / UPEC) OX=199310 GN=ppsA PE=3 SV=1 - [A0A0H2V902_ECOL6]	4050.54	55.05	8	1	36	166	792	87.3415	5.05908	3.13076e-05	0.000298222	2.0935e-06	9.1921e-05	0.104981	-3.2518
WM48_06835	A0A192ENU5	Aconitate hydratase OS=Escherichia coli OX=562 GN=WM48_06835 PE=3 SV=1 - [A0A192ENU5_ECOLX]	7781.9	58.92	19	2	49	346	891	97.6899	5.8208	2.83463e-05	0.00029726	2.94669e-05	0.000261376	0.0953587	-3.39049
fucO	A0A029HKV9	Lactaldehyde reductase OS=Escherichia coli 2-005-03_S4_C3 OX=1444258 GN=fucO PE=4 SV=1 - [A0A029HKV9_ECOLX]	472.822	28.27	21	1	9	19	382	40.5547	5.21143	2.77661e-05	0.000308184	3.14592e-05	0.000272288	0.0900959	-3.47239
G925_00985	A0A0E2L6T1	Glucose-1-phosphatase OS=Escherichia coli (strain UMEA 3162-1) OX=1281200 GN=G925_00985 PE=4 SV=1 - [A0A0E2L6T1_ECOU3]	1671.16	49.39	26	2	17	104	413	45.6749	5.85889	2.50178e-05	0.000298766	6.81904e-07	5.8144e-05	0.0837368	-3.57799
AZZ83_002906	A0A192EWT1	ATPase OS=Escherichia coli OX=562 GN=AZZ83_002906 PE=4 SV=1 - [A0A192EWT1_ECOLX]	1485.09	62.6	139	1	26	67	500	54.2524	6.29053	1.80184e-05	0.000335762	0.0033393	0.0032732	0.0536643	-4.21989
groL	Q0T9P8	60 kDa chaperonin OS=Escherichia coli O6:K15:H31 (strain 536 / UPEC) OX=362663 GN=groL PE=3 SV=1 - [CH60_ECOL5]	42693.7	81.57	6	1	32	1245	548	57.2927	4.94482	1.37119e-05	0.000291774	0.000540623	0.00135705	0.0469949	-4.41135
Q609_ECAC02550G0001	W1WEQ5	Component of an ABC transporter system (Fragment) OS=Escherichia coli DORA_A_5_14_21 OX=1403943 GN=Q609_ECAC02550G0001 PE=4 SV=1 - [W1WEQ5_ECOLX]	29.3	5.48	8	1	1	1	146	16.4224	6.87354	1.28801e-05	0.000303219	0.00020431	0.000825331	0.0424778	-4.55715
BK373_16480	A0A0J2BE83	4-aminobutyrate aminotransferase OS=Escherichia coli OX=562 GN=BK373_16480 PE=3 SV=1 - [A0A0J2BE83_ECOLX]	1084.77	49.06	16	1	16	63	426	45.6985	6.23975	1.06379e-05	0.000281097	0.00419045	0.00362209	0.0378443	-4.72378
